# Supplementary material for: A sensitive and accurate framework for population-scale structural variant discovery and genotyping across sequence types
Source: Research Square preprint supplement (doi:10.21203/rs.3.rs-8773548/v1), 2026-02-18
Supplement: Supplementary file 1 [file 345d31c8a0d8232312b898aa.xlsx]

## Sheet: Table S1
Supplementary Table 1. Published data used in this study
Accession	Download link	Sequencing platform	Sample	Use
ERR11436052	ftp.sra.ebi.ac.uk/vol1/fastq/ERR114/052/ERR11436052/ERR11436052_1.fastq.gz;ftp.sra.ebi.ac.uk/vol1/fastq/ERR114/052/ERR11436052/ERR11436052_2.fastq.gz	Illumina HiSeq 3000	Bla-1	Benchmark on Arabidopsis
ERR11436637	ftp.sra.ebi.ac.uk/vol1/fastq/ERR114/037/ERR11436637/ERR11436637.fastq.gz	PromethION	Ct-1	Benchmark on Arabidopsis
ERR11436058	ftp.sra.ebi.ac.uk/vol1/fastq/ERR114/058/ERR11436058/ERR11436058_1.fastq.gz;ftp.sra.ebi.ac.uk/vol1/fastq/ERR114/058/ERR11436058/ERR11436058_2.fastq.gz	Illumina HiSeq 3000	Ct-1	Benchmark on Arabidopsis
ERR11436000	ftp.sra.ebi.ac.uk/vol1/fastq/ERR114/000/ERR11436000/ERR11436000_1.fastq.gz;ftp.sra.ebi.ac.uk/vol1/fastq/ERR114/000/ERR11436000/ERR11436000_2.fastq.gz	NextSeq 2000	Db-1	Benchmark on Arabidopsis
ERR11437307	ftp.sra.ebi.ac.uk/vol1/fastq/ERR114/007/ERR11437307/ERR11437307.fastq.gz	Sequel II	Db-1	Benchmark on Arabidopsis
ERR11437316	ftp.sra.ebi.ac.uk/vol1/fastq/ERR114/016/ERR11437316/ERR11437316.fastq.gz	Sequel II	Est-1	Benchmark on Arabidopsis
ERR11436009	ftp.sra.ebi.ac.uk/vol1/fastq/ERR114/009/ERR11436009/ERR11436009_1.fastq.gz;ftp.sra.ebi.ac.uk/vol1/fastq/ERR114/009/ERR11436009/ERR11436009_2.fastq.gz	NextSeq 2000	Est-1	Benchmark on Arabidopsis
ERR11436062	ftp.sra.ebi.ac.uk/vol1/fastq/ERR114/062/ERR11436062/ERR11436062_1.fastq.gz;ftp.sra.ebi.ac.uk/vol1/fastq/ERR114/062/ERR11436062/ERR11436062_2.fastq.gz	Illumina HiSeq 3000	Jea	Benchmark on Arabidopsis
ERR11436641	ftp.sra.ebi.ac.uk/vol1/fastq/ERR114/041/ERR11436641/ERR11436641.fastq.gz	PromethION	Jea	Benchmark on Arabidopsis
ERR11436002	ftp.sra.ebi.ac.uk/vol1/fastq/ERR114/002/ERR11436002/ERR11436002_1.fastq.gz;ftp.sra.ebi.ac.uk/vol1/fastq/ERR114/002/ERR11436002/ERR11436002_2.fastq.gz	NextSeq 2000	Kas-1	Benchmark on Arabidopsis
ERR11437309	ftp.sra.ebi.ac.uk/vol1/fastq/ERR114/009/ERR11437309/ERR11437309.fastq.gz	Sequel II	Kas-1	Benchmark on Arabidopsis
ERR11436004	ftp.sra.ebi.ac.uk/vol1/fastq/ERR114/004/ERR11436004/ERR11436004_1.fastq.gz;ftp.sra.ebi.ac.uk/vol1/fastq/ERR114/004/ERR11436004/ERR11436004_2.fastq.gz	NextSeq 2000	Mh-0	Benchmark on Arabidopsis
ERR11437311	ftp.sra.ebi.ac.uk/vol1/fastq/ERR114/011/ERR11437311/ERR11437311.fastq.gz	Sequel II	Mh-0	Benchmark on Arabidopsis
ERR11436644	ftp.sra.ebi.ac.uk/vol1/fastq/ERR114/044/ERR11436644/ERR11436644.fastq.gz	PromethION	Oy-0	Benchmark on Arabidopsis
ERR11436065	ftp.sra.ebi.ac.uk/vol1/fastq/ERR114/065/ERR11436065/ERR11436065_1.fastq.gz;ftp.sra.ebi.ac.uk/vol1/fastq/ERR114/065/ERR11436065/ERR11436065_2.fastq.gz	Illumina HiSeq 3000	Oy-0	Benchmark on Arabidopsis
ERR11437337	ftp.sra.ebi.ac.uk/vol1/fastq/ERR114/037/ERR11437337/ERR11437337.fastq.gz	Sequel II	Sf-2	Benchmark on Arabidopsis
ERR11436029	ftp.sra.ebi.ac.uk/vol1/fastq/ERR114/029/ERR11436029/ERR11436029_1.fastq.gz;ftp.sra.ebi.ac.uk/vol1/fastq/ERR114/029/ERR11436029/ERR11436029_2.fastq.gz	NextSeq 2000	Sf-2	Benchmark on Arabidopsis
ERR11436033	ftp.sra.ebi.ac.uk/vol1/fastq/ERR114/033/ERR11436033/ERR11436033_1.fastq.gz;ftp.sra.ebi.ac.uk/vol1/fastq/ERR114/033/ERR11436033/ERR11436033_2.fastq.gz	NextSeq 2000	St-0	Benchmark on Arabidopsis
ERR11437341	ftp.sra.ebi.ac.uk/vol1/fastq/ERR114/041/ERR11437341/ERR11437341.fastq.gz	Sequel II	St-0	Benchmark on Arabidopsis
ERR11436034	ftp.sra.ebi.ac.uk/vol1/fastq/ERR114/034/ERR11436034/ERR11436034_1.fastq.gz;ftp.sra.ebi.ac.uk/vol1/fastq/ERR114/034/ERR11436034/ERR11436034_2.fastq.gz	NextSeq 2000	Stw-0	Benchmark on Arabidopsis
ERR11437342	ftp.sra.ebi.ac.uk/vol1/fastq/ERR114/042/ERR11437342/ERR11437342.fastq.gz	Sequel II	Stw-0	Benchmark on Arabidopsis
ERR13765503	ftp.sra.ebi.ac.uk/vol1/fastq/ERR137/003/ERR13765503/ERR13765503_1.fastq.gz;ftp.sra.ebi.ac.uk/vol1/fastq/ERR137/003/ERR13765503/ERR13765503_2.fastq.gz	Illumina HiSeq 4000	HP436	Benchmark on Oryza sativa
ERR13765499	ftp.sra.ebi.ac.uk/vol1/fastq/ERR137/099/ERR13765499/ERR13765499_1.fastq.gz;ftp.sra.ebi.ac.uk/vol1/fastq/ERR137/099/ERR13765499/ERR13765499_2.fastq.gz	Illumina HiSeq 4000	GP58	Benchmark on Oryza sativa
ERR13765497	ftp.sra.ebi.ac.uk/vol1/fastq/ERR137/097/ERR13765497/ERR13765497_1.fastq.gz;ftp.sra.ebi.ac.uk/vol1/fastq/ERR137/097/ERR13765497/ERR13765497_2.fastq.gz	Illumina HiSeq 4000	GP524	Benchmark on Oryza sativa
ERR13765495	ftp.sra.ebi.ac.uk/vol1/fastq/ERR137/095/ERR13765495/ERR13765495_1.fastq.gz;ftp.sra.ebi.ac.uk/vol1/fastq/ERR137/095/ERR13765495/ERR13765495_2.fastq.gz	Illumina HiSeq 4000	GP505	Benchmark on Oryza sativa
ERR13765493	ftp.sra.ebi.ac.uk/vol1/fastq/ERR137/093/ERR13765493/ERR13765493_1.fastq.gz;ftp.sra.ebi.ac.uk/vol1/fastq/ERR137/093/ERR13765493/ERR13765493_2.fastq.gz	Illumina HiSeq 4000	GP117	Benchmark on Oryza sativa
ERR13765492	ftp.sra.ebi.ac.uk/vol1/fastq/ERR137/092/ERR13765492/ERR13765492_1.fastq.gz;ftp.sra.ebi.ac.uk/vol1/fastq/ERR137/092/ERR13765492/ERR13765492_2.fastq.gz	Illumina HiSeq 4000	GP100	Benchmark on Oryza sativa
ERR13765491	ftp.sra.ebi.ac.uk/vol1/fastq/ERR137/091/ERR13765491/ERR13765491_1.fastq.gz;ftp.sra.ebi.ac.uk/vol1/fastq/ERR137/091/ERR13765491/ERR13765491_2.fastq.gz	Illumina HiSeq 4000	Gla4	Benchmark on Oryza sativa
ERR13765490	ftp.sra.ebi.ac.uk/vol1/fastq/ERR137/090/ERR13765490/ERR13765490_1.fastq.gz;ftp.sra.ebi.ac.uk/vol1/fastq/ERR137/090/ERR13765490/ERR13765490_2.fastq.gz	Illumina HiSeq 4000	534M	Benchmark on Oryza sativa
ERR13765489	ftp.sra.ebi.ac.uk/vol1/fastq/ERR137/089/ERR13765489/ERR13765489_1.fastq.gz;ftp.sra.ebi.ac.uk/vol1/fastq/ERR137/089/ERR13765489/ERR13765489_2.fastq.gz	Illumina NovaSeq 6000	W3096	Benchmark on Oryza sativa
ERR3307811	ftp.sra.ebi.ac.uk/vol1/fastq/ERR330/001/ERR3307811/ERR3307811_1.fastq.gz;ftp.sra.ebi.ac.uk/vol1/fastq/ERR330/001/ERR3307811/ERR3307811_2.fastq.gz	NextSeq 550	NAM founder line B97	Benchmark on maize
ERR3307812	ftp.sra.ebi.ac.uk/vol1/fastq/ERR330/002/ERR3307812/ERR3307812_1.fastq.gz;ftp.sra.ebi.ac.uk/vol1/fastq/ERR330/002/ERR3307812/ERR3307812_2.fastq.gz	NextSeq 550	NAM founder line B97	Benchmark on maize
ERR3309206	ftp.sra.ebi.ac.uk/vol1/fastq/ERR330/006/ERR3309206/ERR3309206_subreads.fastq.gz	Sequel	NAM founder line B97	Benchmark on maize
ERR3309208	ftp.sra.ebi.ac.uk/vol1/fastq/ERR330/008/ERR3309208/ERR3309208_subreads.fastq.gz	Sequel	NAM founder line B97	Benchmark on maize
ERR3309213	ftp.sra.ebi.ac.uk/vol1/fastq/ERR330/003/ERR3309213/ERR3309213_subreads.fastq.gz	Sequel	NAM founder line B97	Benchmark on maize
ERR3307809	ftp.sra.ebi.ac.uk/vol1/fastq/ERR330/009/ERR3307809/ERR3307809_1.fastq.gz;ftp.sra.ebi.ac.uk/vol1/fastq/ERR330/009/ERR3307809/ERR3307809_2.fastq.gz	NextSeq 550	NAM founder line B97	Benchmark on maize
ERR3307810	ftp.sra.ebi.ac.uk/vol1/fastq/ERR330/000/ERR3307810/ERR3307810_1.fastq.gz;ftp.sra.ebi.ac.uk/vol1/fastq/ERR330/000/ERR3307810/ERR3307810_2.fastq.gz	NextSeq 550	NAM founder line B97	Benchmark on maize
ERR3309194	ftp.sra.ebi.ac.uk/vol1/fastq/ERR330/004/ERR3309194/ERR3309194_subreads.fastq.gz	Sequel	NAM founder line B97	Benchmark on maize
ERR3309196	ftp.sra.ebi.ac.uk/vol1/fastq/ERR330/006/ERR3309196/ERR3309196_subreads.fastq.gz	Sequel	NAM founder line B97	Benchmark on maize
ERR3309198	ftp.sra.ebi.ac.uk/vol1/fastq/ERR330/008/ERR3309198/ERR3309198_subreads.fastq.gz	Sequel	NAM founder line B97	Benchmark on maize
ERR3309199	ftp.sra.ebi.ac.uk/vol1/fastq/ERR330/009/ERR3309199/ERR3309199_subreads.fastq.gz	Sequel	NAM founder line B97	Benchmark on maize
ERR3309200	ftp.sra.ebi.ac.uk/vol1/fastq/ERR330/000/ERR3309200/ERR3309200_subreads.fastq.gz	Sequel	NAM founder line B97	Benchmark on maize
ERR3309201	ftp.sra.ebi.ac.uk/vol1/fastq/ERR330/001/ERR3309201/ERR3309201_subreads.fastq.gz	Sequel	NAM founder line B97	Benchmark on maize
ERR3309202	ftp.sra.ebi.ac.uk/vol1/fastq/ERR330/002/ERR3309202/ERR3309202_subreads.fastq.gz	Sequel	NAM founder line B97	Benchmark on maize
ERR3309205	ftp.sra.ebi.ac.uk/vol1/fastq/ERR330/005/ERR3309205/ERR3309205_subreads.fastq.gz	Sequel	NAM founder line B97	Benchmark on maize
ERR3309209	ftp.sra.ebi.ac.uk/vol1/fastq/ERR330/009/ERR3309209/ERR3309209_subreads.fastq.gz	Sequel	NAM founder line B97	Benchmark on maize
ERR3309210	ftp.sra.ebi.ac.uk/vol1/fastq/ERR330/000/ERR3309210/ERR3309210_subreads.fastq.gz	Sequel	NAM founder line B97	Benchmark on maize
ERR3309211	ftp.sra.ebi.ac.uk/vol1/fastq/ERR330/001/ERR3309211/ERR3309211_subreads.fastq.gz	Sequel	NAM founder line B97	Benchmark on maize
ERR3309195	ftp.sra.ebi.ac.uk/vol1/fastq/ERR330/005/ERR3309195/ERR3309195_subreads.fastq.gz	Sequel	NAM founder line B97	Benchmark on maize
ERR3309197	ftp.sra.ebi.ac.uk/vol1/fastq/ERR330/007/ERR3309197/ERR3309197_subreads.fastq.gz	Sequel	NAM founder line B97	Benchmark on maize
ERR3309203	ftp.sra.ebi.ac.uk/vol1/fastq/ERR330/003/ERR3309203/ERR3309203_subreads.fastq.gz	Sequel	NAM founder line B97	Benchmark on maize
ERR3309204	ftp.sra.ebi.ac.uk/vol1/fastq/ERR330/004/ERR3309204/ERR3309204_subreads.fastq.gz	Sequel	NAM founder line B97	Benchmark on maize
ERR3309207	ftp.sra.ebi.ac.uk/vol1/fastq/ERR330/007/ERR3309207/ERR3309207_subreads.fastq.gz	Sequel	NAM founder line B97	Benchmark on maize
ERR3309212	ftp.sra.ebi.ac.uk/vol1/fastq/ERR330/002/ERR3309212/ERR3309212_subreads.fastq.gz	Sequel	NAM founder line B97	Benchmark on maize
ERR3309214	ftp.sra.ebi.ac.uk/vol1/fastq/ERR330/004/ERR3309214/ERR3309214_subreads.fastq.gz	Sequel	NAM founder line B97	Benchmark on maize
ERR3309215	ftp.sra.ebi.ac.uk/vol1/fastq/ERR330/005/ERR3309215/ERR3309215_subreads.fastq.gz	Sequel	NAM founder line B97	Benchmark on maize
ERR3309216	ftp.sra.ebi.ac.uk/vol1/fastq/ERR330/006/ERR3309216/ERR3309216_subreads.fastq.gz	Sequel	NAM founder line B97	Benchmark on maize
ERR3307836	ftp.sra.ebi.ac.uk/vol1/fastq/ERR330/006/ERR3307836/ERR3307836_1.fastq.gz;ftp.sra.ebi.ac.uk/vol1/fastq/ERR330/006/ERR3307836/ERR3307836_2.fastq.gz	NextSeq 550	NAM founder line CML103	Benchmark on maize
ERR3309217	ftp.sra.ebi.ac.uk/vol1/fastq/ERR330/007/ERR3309217/ERR3309217_subreads.fastq.gz	Sequel	NAM founder line CML103	Benchmark on maize
ERR3309219	ftp.sra.ebi.ac.uk/vol1/fastq/ERR330/009/ERR3309219/ERR3309219_subreads.fastq.gz	Sequel	NAM founder line CML103	Benchmark on maize
ERR3309223	ftp.sra.ebi.ac.uk/vol1/fastq/ERR330/003/ERR3309223/ERR3309223_subreads.fastq.gz	Sequel	NAM founder line CML103	Benchmark on maize
ERR3309226	ftp.sra.ebi.ac.uk/vol1/fastq/ERR330/006/ERR3309226/ERR3309226_subreads.fastq.gz	Sequel	NAM founder line CML103	Benchmark on maize
ERR3309227	ftp.sra.ebi.ac.uk/vol1/fastq/ERR330/007/ERR3309227/ERR3309227_subreads.fastq.gz	Sequel	NAM founder line CML103	Benchmark on maize
ERR3309228	ftp.sra.ebi.ac.uk/vol1/fastq/ERR330/008/ERR3309228/ERR3309228_subreads.fastq.gz	Sequel	NAM founder line CML103	Benchmark on maize
ERR3309230	ftp.sra.ebi.ac.uk/vol1/fastq/ERR330/000/ERR3309230/ERR3309230_subreads.fastq.gz	Sequel	NAM founder line CML103	Benchmark on maize
ERR3309236	ftp.sra.ebi.ac.uk/vol1/fastq/ERR330/006/ERR3309236/ERR3309236_subreads.fastq.gz	Sequel	NAM founder line CML103	Benchmark on maize
ERR3307834	ftp.sra.ebi.ac.uk/vol1/fastq/ERR330/004/ERR3307834/ERR3307834_1.fastq.gz;ftp.sra.ebi.ac.uk/vol1/fastq/ERR330/004/ERR3307834/ERR3307834_2.fastq.gz	NextSeq 550	NAM founder line CML103	Benchmark on maize
ERR3309218	ftp.sra.ebi.ac.uk/vol1/fastq/ERR330/008/ERR3309218/ERR3309218_subreads.fastq.gz	Sequel	NAM founder line CML103	Benchmark on maize
ERR3309220	ftp.sra.ebi.ac.uk/vol1/fastq/ERR330/000/ERR3309220/ERR3309220_subreads.fastq.gz	Sequel	NAM founder line CML103	Benchmark on maize
ERR3309222	ftp.sra.ebi.ac.uk/vol1/fastq/ERR330/002/ERR3309222/ERR3309222_subreads.fastq.gz	Sequel	NAM founder line CML103	Benchmark on maize
ERR3309224	ftp.sra.ebi.ac.uk/vol1/fastq/ERR330/004/ERR3309224/ERR3309224_subreads.fastq.gz	Sequel	NAM founder line CML103	Benchmark on maize
ERR3309225	ftp.sra.ebi.ac.uk/vol1/fastq/ERR330/005/ERR3309225/ERR3309225_subreads.fastq.gz	Sequel	NAM founder line CML103	Benchmark on maize
ERR3309232	ftp.sra.ebi.ac.uk/vol1/fastq/ERR330/002/ERR3309232/ERR3309232_subreads.fastq.gz	Sequel	NAM founder line CML103	Benchmark on maize
ERR3309234	ftp.sra.ebi.ac.uk/vol1/fastq/ERR330/004/ERR3309234/ERR3309234_subreads.fastq.gz	Sequel	NAM founder line CML103	Benchmark on maize
ERR3309235	ftp.sra.ebi.ac.uk/vol1/fastq/ERR330/005/ERR3309235/ERR3309235_subreads.fastq.gz	Sequel	NAM founder line CML103	Benchmark on maize
ERR3309237	ftp.sra.ebi.ac.uk/vol1/fastq/ERR330/007/ERR3309237/ERR3309237_subreads.fastq.gz	Sequel	NAM founder line CML103	Benchmark on maize
ERR3309239	ftp.sra.ebi.ac.uk/vol1/fastq/ERR330/009/ERR3309239/ERR3309239_subreads.fastq.gz	Sequel	NAM founder line CML103	Benchmark on maize
ERR3307833	ftp.sra.ebi.ac.uk/vol1/fastq/ERR330/003/ERR3307833/ERR3307833_1.fastq.gz;ftp.sra.ebi.ac.uk/vol1/fastq/ERR330/003/ERR3307833/ERR3307833_2.fastq.gz	NextSeq 550	NAM founder line CML103	Benchmark on maize
ERR3307835	ftp.sra.ebi.ac.uk/vol1/fastq/ERR330/005/ERR3307835/ERR3307835_1.fastq.gz;ftp.sra.ebi.ac.uk/vol1/fastq/ERR330/005/ERR3307835/ERR3307835_2.fastq.gz	NextSeq 550	NAM founder line CML103	Benchmark on maize
ERR3309221	ftp.sra.ebi.ac.uk/vol1/fastq/ERR330/001/ERR3309221/ERR3309221_subreads.fastq.gz	Sequel	NAM founder line CML103	Benchmark on maize
ERR3309229	ftp.sra.ebi.ac.uk/vol1/fastq/ERR330/009/ERR3309229/ERR3309229_subreads.fastq.gz	Sequel	NAM founder line CML103	Benchmark on maize
ERR3309231	ftp.sra.ebi.ac.uk/vol1/fastq/ERR330/001/ERR3309231/ERR3309231_subreads.fastq.gz	Sequel	NAM founder line CML103	Benchmark on maize
ERR3309233	ftp.sra.ebi.ac.uk/vol1/fastq/ERR330/003/ERR3309233/ERR3309233_subreads.fastq.gz	Sequel	NAM founder line CML103	Benchmark on maize
ERR3309238	ftp.sra.ebi.ac.uk/vol1/fastq/ERR330/008/ERR3309238/ERR3309238_subreads.fastq.gz	Sequel	NAM founder line CML103	Benchmark on maize
ERR3307831	ftp.sra.ebi.ac.uk/vol1/fastq/ERR330/001/ERR3307831/ERR3307831_1.fastq.gz;ftp.sra.ebi.ac.uk/vol1/fastq/ERR330/001/ERR3307831/ERR3307831_2.fastq.gz	NextSeq 550	NAM founder line CML69	Benchmark on maize
ERR3309384	ftp.sra.ebi.ac.uk/vol1/fastq/ERR330/004/ERR3309384/ERR3309384_subreads.fastq.gz	Sequel	NAM founder line CML69	Benchmark on maize
ERR3309385	ftp.sra.ebi.ac.uk/vol1/fastq/ERR330/005/ERR3309385/ERR3309385_subreads.fastq.gz	Sequel	NAM founder line CML69	Benchmark on maize
ERR3309386	ftp.sra.ebi.ac.uk/vol1/fastq/ERR330/006/ERR3309386/ERR3309386_subreads.fastq.gz	Sequel	NAM founder line CML69	Benchmark on maize
ERR3309394	ftp.sra.ebi.ac.uk/vol1/fastq/ERR330/004/ERR3309394/ERR3309394_subreads.fastq.gz	Sequel	NAM founder line CML69	Benchmark on maize
ERR3309397	ftp.sra.ebi.ac.uk/vol1/fastq/ERR330/007/ERR3309397/ERR3309397_subreads.fastq.gz	Sequel	NAM founder line CML69	Benchmark on maize
ERR3309399	ftp.sra.ebi.ac.uk/vol1/fastq/ERR330/009/ERR3309399/ERR3309399_subreads.fastq.gz	Sequel	NAM founder line CML69	Benchmark on maize
ERR3307829	ftp.sra.ebi.ac.uk/vol1/fastq/ERR330/009/ERR3307829/ERR3307829_1.fastq.gz;ftp.sra.ebi.ac.uk/vol1/fastq/ERR330/009/ERR3307829/ERR3307829_2.fastq.gz	NextSeq 550	NAM founder line CML69	Benchmark on maize
ERR3307830	ftp.sra.ebi.ac.uk/vol1/fastq/ERR330/000/ERR3307830/ERR3307830_1.fastq.gz;ftp.sra.ebi.ac.uk/vol1/fastq/ERR330/000/ERR3307830/ERR3307830_2.fastq.gz	NextSeq 550	NAM founder line CML69	Benchmark on maize
ERR3307832	ftp.sra.ebi.ac.uk/vol1/fastq/ERR330/002/ERR3307832/ERR3307832_1.fastq.gz;ftp.sra.ebi.ac.uk/vol1/fastq/ERR330/002/ERR3307832/ERR3307832_2.fastq.gz	NextSeq 550	NAM founder line CML69	Benchmark on maize
ERR3309383	ftp.sra.ebi.ac.uk/vol1/fastq/ERR330/003/ERR3309383/ERR3309383_subreads.fastq.gz	Sequel	NAM founder line CML69	Benchmark on maize
ERR3309388	ftp.sra.ebi.ac.uk/vol1/fastq/ERR330/008/ERR3309388/ERR3309388_subreads.fastq.gz	Sequel	NAM founder line CML69	Benchmark on maize
ERR3309389	ftp.sra.ebi.ac.uk/vol1/fastq/ERR330/009/ERR3309389/ERR3309389_subreads.fastq.gz	Sequel	NAM founder line CML69	Benchmark on maize
ERR3309392	ftp.sra.ebi.ac.uk/vol1/fastq/ERR330/002/ERR3309392/ERR3309392_subreads.fastq.gz	Sequel	NAM founder line CML69	Benchmark on maize
ERR3309396	ftp.sra.ebi.ac.uk/vol1/fastq/ERR330/006/ERR3309396/ERR3309396_subreads.fastq.gz	Sequel	NAM founder line CML69	Benchmark on maize
ERR3309398	ftp.sra.ebi.ac.uk/vol1/fastq/ERR330/008/ERR3309398/ERR3309398_subreads.fastq.gz	Sequel	NAM founder line CML69	Benchmark on maize
ERR3309402	ftp.sra.ebi.ac.uk/vol1/fastq/ERR330/002/ERR3309402/ERR3309402_subreads.fastq.gz	Sequel	NAM founder line CML69	Benchmark on maize
ERR3309403	ftp.sra.ebi.ac.uk/vol1/fastq/ERR330/003/ERR3309403/ERR3309403_subreads.fastq.gz	Sequel	NAM founder line CML69	Benchmark on maize
ERR3309404	ftp.sra.ebi.ac.uk/vol1/fastq/ERR330/004/ERR3309404/ERR3309404_subreads.fastq.gz	Sequel	NAM founder line CML69	Benchmark on maize
ERR3309387	ftp.sra.ebi.ac.uk/vol1/fastq/ERR330/007/ERR3309387/ERR3309387_subreads.fastq.gz	Sequel	NAM founder line CML69	Benchmark on maize
ERR3309390	ftp.sra.ebi.ac.uk/vol1/fastq/ERR330/000/ERR3309390/ERR3309390_subreads.fastq.gz	Sequel	NAM founder line CML69	Benchmark on maize
ERR3309391	ftp.sra.ebi.ac.uk/vol1/fastq/ERR330/001/ERR3309391/ERR3309391_subreads.fastq.gz	Sequel	NAM founder line CML69	Benchmark on maize
ERR3309393	ftp.sra.ebi.ac.uk/vol1/fastq/ERR330/003/ERR3309393/ERR3309393_subreads.fastq.gz	Sequel	NAM founder line CML69	Benchmark on maize
ERR3309395	ftp.sra.ebi.ac.uk/vol1/fastq/ERR330/005/ERR3309395/ERR3309395_subreads.fastq.gz	Sequel	NAM founder line CML69	Benchmark on maize
ERR3309400	ftp.sra.ebi.ac.uk/vol1/fastq/ERR330/000/ERR3309400/ERR3309400_subreads.fastq.gz	Sequel	NAM founder line CML69	Benchmark on maize
ERR3309401	ftp.sra.ebi.ac.uk/vol1/fastq/ERR330/001/ERR3309401/ERR3309401_subreads.fastq.gz	Sequel	NAM founder line CML69	Benchmark on maize
CRA014517	ftp://download.big.ac.cn/gsa2/CRA014517/CRR1016037/CRR1016037_f1.fq.gz|ftp://download.big.ac.cn/gsa2/CRA014517/CRR1016037/CRR1016037_r2.fq.gz	ILLUMINA	lettuce	Benchmark on tetraploid datasets
SRR32121366	https://trace.ncbi.nlm.nih.gov/Traces/index.html?run=SRR32121368	Sequel II	Eig	Benchmark on tetraploid datasets
SRR32121368	https://trace.ncbi.nlm.nih.gov/Traces/index.html?run=SRR32121366	Sequel II	BdF	Benchmark on tetraploid datasets
SRR32121371	https://trace.ncbi.nlm.nih.gov/Traces/index.html?run=SRR32121371	Sequel II	Flo	Benchmark on tetraploid datasets
HG002	ftp://ftp-trace.ncbi.nlm.nih.gov/ReferenceSamples/giab/data/AshkenazimTrio/HG002_NA24385_son/NIST_HiSeq_HG002_Homogeneity-10953946/HG002_HiSeq300x_fastq/140528_D00360_0018_AH8VC6ADXX/Project_RM8391_RM8392/Sample_2A1/2A1_CGATGT_L001_R1_001.fastq.gz	Illumina WGS	HG002	Benchmark PSVGT on short reads
HG002	ftp://ftp-trace.ncbi.nlm.nih.gov/ReferenceSamples/giab/data/AshkenazimTrio/HG002_NA24385_son/NIST_HiSeq_HG002_Homogeneity-10953946/HG002_HiSeq300x_fastq/140528_D00360_0018_AH8VC6ADXX/Project_RM8391_RM8392/Sample_2A1/2A1_CGATGT_L001_R1_002.fastq.gz	Illumina WGS	HG002	Benchmark PSVGT on short reads
HG002	ftp://ftp-trace.ncbi.nlm.nih.gov/ReferenceSamples/giab/data/AshkenazimTrio/HG002_NA24385_son/NIST_HiSeq_HG002_Homogeneity-10953946/HG002_HiSeq300x_fastq/140528_D00360_0018_AH8VC6ADXX/Project_RM8391_RM8392/Sample_2A1/2A1_CGATGT_L002_R1_001.fastq.gz	Illumina WGS	HG002	Benchmark PSVGT on short reads
HG002	ftp://ftp-trace.ncbi.nlm.nih.gov/ReferenceSamples/giab/data/AshkenazimTrio/HG002_NA24385_son/NIST_HiSeq_HG002_Homogeneity-10953946/HG002_HiSeq300x_fastq/140528_D00360_0018_AH8VC6ADXX/Project_RM8391_RM8392/Sample_2A1/2A1_CGATGT_L002_R1_002.fastq.gz	Illumina WGS	HG002	Benchmark PSVGT on short reads
HG002	ftp://ftp-trace.ncbi.nlm.nih.gov/ReferenceSamples/giab/data/AshkenazimTrio/HG002_NA24385_son/NIST_HiSeq_HG002_Homogeneity-10953946/HG002_HiSeq300x_fastq/140528_D00360_0018_AH8VC6ADXX/Project_RM8391_RM8392/Sample_2A2/2A2_TGACCA_L001_R1_001.fastq.gz	Illumina WGS	HG002	Benchmark PSVGT on short reads
HG002	ftp://ftp-trace.ncbi.nlm.nih.gov/ReferenceSamples/giab/data/AshkenazimTrio/HG002_NA24385_son/NIST_HiSeq_HG002_Homogeneity-10953946/HG002_HiSeq300x_fastq/140528_D00360_0018_AH8VC6ADXX/Project_RM8391_RM8392/Sample_2A2/2A2_TGACCA_L001_R1_002.fastq.gz	Illumina WGS	HG002	Benchmark PSVGT on short reads
HG002	ftp://ftp-trace.ncbi.nlm.nih.gov/ReferenceSamples/giab/data/AshkenazimTrio/HG002_NA24385_son/NIST_HiSeq_HG002_Homogeneity-10953946/HG002_HiSeq300x_fastq/140528_D00360_0018_AH8VC6ADXX/Project_RM8391_RM8392/Sample_2A2/2A2_TGACCA_L002_R1_001.fastq.gz	Illumina WGS	HG002	Benchmark PSVGT on short reads
HG002	ftp://ftp-trace.ncbi.nlm.nih.gov/ReferenceSamples/giab/data/AshkenazimTrio/HG002_NA24385_son/NIST_HiSeq_HG002_Homogeneity-10953946/HG002_HiSeq300x_fastq/140528_D00360_0018_AH8VC6ADXX/Project_RM8391_RM8392/Sample_2A2/2A2_TGACCA_L002_R1_002.fastq.gz	Illumina WGS	HG002	Benchmark PSVGT on short reads
HG002	ftp://ftp-trace.ncbi.nlm.nih.gov/ReferenceSamples/giab/data/AshkenazimTrio/HG002_NA24385_son/NIST_HiSeq_HG002_Homogeneity-10953946/HG002_HiSeq300x_fastq/140528_D00360_0018_AH8VC6ADXX/Project_RM8391_RM8392/Sample_2B1/2B1_CAGATC_L001_R1_001.fastq.gz	Illumina WGS	HG002	Benchmark PSVGT on short reads
HG002	ftp://ftp-trace.ncbi.nlm.nih.gov/ReferenceSamples/giab/data/AshkenazimTrio/HG002_NA24385_son/NIST_HiSeq_HG002_Homogeneity-10953946/HG002_HiSeq300x_fastq/140528_D00360_0018_AH8VC6ADXX/Project_RM8391_RM8392/Sample_2B1/2B1_CAGATC_L001_R1_002.fastq.gz	Illumina WGS	HG002	Benchmark PSVGT on short reads
HG002	ftp://ftp-trace.ncbi.nlm.nih.gov/ReferenceSamples/giab/data/AshkenazimTrio/HG002_NA24385_son/NIST_HiSeq_HG002_Homogeneity-10953946/HG002_HiSeq300x_fastq/140528_D00360_0018_AH8VC6ADXX/Project_RM8391_RM8392/Sample_2B1/2B1_CAGATC_L002_R1_001.fastq.gz	Illumina WGS	HG002	Benchmark PSVGT on short reads
HG002	ftp://ftp-trace.ncbi.nlm.nih.gov/ReferenceSamples/giab/data/AshkenazimTrio/HG002_NA24385_son/NIST_HiSeq_HG002_Homogeneity-10953946/HG002_HiSeq300x_fastq/140528_D00360_0018_AH8VC6ADXX/Project_RM8391_RM8392/Sample_2B1/2B1_CAGATC_L002_R1_002.fastq.gz	Illumina WGS	HG002	Benchmark PSVGT on short reads
HG002	ftp://ftp-trace.ncbi.nlm.nih.gov/ReferenceSamples/giab/data/AshkenazimTrio/HG002_NA24385_son/NIST_HiSeq_HG002_Homogeneity-10953946/HG002_HiSeq300x_fastq/140528_D00360_0018_AH8VC6ADXX/Project_RM8391_RM8392/Sample_2B2/2B2_CCGTCC_L001_R1_001.fastq.gz	Illumina WGS	HG002	Benchmark PSVGT on short reads
HG002	ftp://ftp-trace.ncbi.nlm.nih.gov/ReferenceSamples/giab/data/AshkenazimTrio/HG002_NA24385_son/NIST_HiSeq_HG002_Homogeneity-10953946/HG002_HiSeq300x_fastq/140528_D00360_0018_AH8VC6ADXX/Project_RM8391_RM8392/Sample_2B2/2B2_CCGTCC_L001_R1_002.fastq.gz	Illumina WGS	HG002	Benchmark PSVGT on short reads
HG002	ftp://ftp-trace.ncbi.nlm.nih.gov/ReferenceSamples/giab/data/AshkenazimTrio/HG002_NA24385_son/NIST_HiSeq_HG002_Homogeneity-10953946/HG002_HiSeq300x_fastq/140528_D00360_0018_AH8VC6ADXX/Project_RM8391_RM8392/Sample_2B2/2B2_CCGTCC_L002_R1_001.fastq.gz	Illumina WGS	HG002	Benchmark PSVGT on short reads
HG002	ftp://ftp-trace.ncbi.nlm.nih.gov/ReferenceSamples/giab/data/AshkenazimTrio/HG002_NA24385_son/NIST_HiSeq_HG002_Homogeneity-10953946/HG002_HiSeq300x_fastq/140528_D00360_0018_AH8VC6ADXX/Project_RM8391_RM8392/Sample_2B2/2B2_CCGTCC_L002_R1_002.fastq.gz	Illumina WGS	HG002	Benchmark PSVGT on short reads
HG002	ftp://ftp-trace.ncbi.nlm.nih.gov/ReferenceSamples/giab/data/AshkenazimTrio/HG002_NA24385_son/NIST_HiSeq_HG002_Homogeneity-10953946/HG002_HiSeq300x_fastq/140528_D00360_0018_AH8VC6ADXX/Project_RM8391_RM8392/Sample_2C1/2C1_AGTCAA_L001_R1_001.fastq.gz	Illumina WGS	HG002	Benchmark PSVGT on short reads
HG002	ftp://ftp-trace.ncbi.nlm.nih.gov/ReferenceSamples/giab/data/AshkenazimTrio/HG002_NA24385_son/NIST_HiSeq_HG002_Homogeneity-10953946/HG002_HiSeq300x_fastq/140528_D00360_0018_AH8VC6ADXX/Project_RM8391_RM8392/Sample_2C1/2C1_AGTCAA_L001_R1_002.fastq.gz	Illumina WGS	HG002	Benchmark PSVGT on short reads
HG002	ftp://ftp-trace.ncbi.nlm.nih.gov/ReferenceSamples/giab/data/AshkenazimTrio/HG002_NA24385_son/NIST_HiSeq_HG002_Homogeneity-10953946/HG002_HiSeq300x_fastq/140528_D00360_0018_AH8VC6ADXX/Project_RM8391_RM8392/Sample_2C1/2C1_AGTCAA_L002_R1_001.fastq.gz	Illumina WGS	HG002	Benchmark PSVGT on short reads
HG002	ftp://ftp-trace.ncbi.nlm.nih.gov/ReferenceSamples/giab/data/AshkenazimTrio/HG002_NA24385_son/NIST_HiSeq_HG002_Homogeneity-10953946/HG002_HiSeq300x_fastq/140528_D00360_0018_AH8VC6ADXX/Project_RM8391_RM8392/Sample_2C1/2C1_AGTCAA_L002_R1_002.fastq.gz	Illumina WGS	HG002	Benchmark PSVGT on short reads
HG002	ftp://ftp-trace.ncbi.nlm.nih.gov/ReferenceSamples/giab/data/AshkenazimTrio/HG002_NA24385_son/NIST_HiSeq_HG002_Homogeneity-10953946/HG002_HiSeq300x_fastq/140528_D00360_0018_AH8VC6ADXX/Project_RM8391_RM8392/Sample_2C2/2C2_AGTTCC_L001_R1_001.fastq.gz	Illumina WGS	HG002	Benchmark PSVGT on short reads
HG002	ftp://ftp-trace.ncbi.nlm.nih.gov/ReferenceSamples/giab/data/AshkenazimTrio/HG002_NA24385_son/NIST_HiSeq_HG002_Homogeneity-10953946/HG002_HiSeq300x_fastq/140528_D00360_0018_AH8VC6ADXX/Project_RM8391_RM8392/Sample_2C2/2C2_AGTTCC_L002_R1_001.fastq.gz	Illumina WGS	HG002	Benchmark PSVGT on short reads
HG002	ftp://ftp-trace.ncbi.nlm.nih.gov/ReferenceSamples/giab/data/AshkenazimTrio/HG002_NA24385_son/NIST_HiSeq_HG002_Homogeneity-10953946/HG002_HiSeq300x_fastq/140528_D00360_0018_AH8VC6ADXX/Project_RM8391_RM8392/Sample_2C2/2C2_AGTTCC_L002_R1_002.fastq.gz	Illumina WGS	HG002	Benchmark PSVGT on short reads
HG002	ftp://ftp-trace.ncbi.nlm.nih.gov/ReferenceSamples/giab/data/AshkenazimTrio/HG002_NA24385_son/NIST_HiSeq_HG002_Homogeneity-10953946/HG002_HiSeq300x_fastq/140528_D00360_0018_AH8VC6ADXX/Project_RM8391_RM8392/Sample_2D1/2D1_ATGTCA_L001_R1_001.fastq.gz	Illumina WGS	HG002	Benchmark PSVGT on short reads
HG002	ftp://ftp-trace.ncbi.nlm.nih.gov/ReferenceSamples/giab/data/AshkenazimTrio/HG002_NA24385_son/NIST_HiSeq_HG002_Homogeneity-10953946/HG002_HiSeq300x_fastq/140528_D00360_0018_AH8VC6ADXX/Project_RM8391_RM8392/Sample_2D1/2D1_ATGTCA_L001_R1_002.fastq.gz	Illumina WGS	HG002	Benchmark PSVGT on short reads
HG002	ftp://ftp-trace.ncbi.nlm.nih.gov/ReferenceSamples/giab/data/AshkenazimTrio/HG002_NA24385_son/NIST_HiSeq_HG002_Homogeneity-10953946/HG002_HiSeq300x_fastq/140528_D00360_0018_AH8VC6ADXX/Project_RM8391_RM8392/Sample_2D1/2D1_ATGTCA_L002_R1_001.fastq.gz	Illumina WGS	HG002	Benchmark PSVGT on short reads
HG002	ftp://ftp-trace.ncbi.nlm.nih.gov/ReferenceSamples/giab/data/AshkenazimTrio/HG002_NA24385_son/NIST_HiSeq_HG002_Homogeneity-10953946/HG002_HiSeq300x_fastq/140528_D00360_0018_AH8VC6ADXX/Project_RM8391_RM8392/Sample_2D1/2D1_ATGTCA_L002_R1_002.fastq.gz	Illumina WGS	HG002	Benchmark PSVGT on short reads
HG002	ftp://ftp-trace.ncbi.nlm.nih.gov/ReferenceSamples/giab/data/AshkenazimTrio/HG002_NA24385_son/NIST_HiSeq_HG002_Homogeneity-10953946/HG002_HiSeq300x_fastq/140528_D00360_0018_AH8VC6ADXX/Project_RM8391_RM8392/Sample_2D2/2D2_GTCCGC_L001_R1_001.fastq.gz	Illumina WGS	HG002	Benchmark PSVGT on short reads
HG002	ftp://ftp-trace.ncbi.nlm.nih.gov/ReferenceSamples/giab/data/AshkenazimTrio/HG002_NA24385_son/NIST_HiSeq_HG002_Homogeneity-10953946/HG002_HiSeq300x_fastq/140528_D00360_0018_AH8VC6ADXX/Project_RM8391_RM8392/Sample_2D2/2D2_GTCCGC_L001_R1_002.fastq.gz	Illumina WGS	HG002	Benchmark PSVGT on short reads
HG002	ftp://ftp-trace.ncbi.nlm.nih.gov/ReferenceSamples/giab/data/AshkenazimTrio/HG002_NA24385_son/NIST_HiSeq_HG002_Homogeneity-10953946/HG002_HiSeq300x_fastq/140528_D00360_0018_AH8VC6ADXX/Project_RM8391_RM8392/Sample_2D2/2D2_GTCCGC_L002_R1_001.fastq.gz	Illumina WGS	HG002	Benchmark PSVGT on short reads
HG002	ftp://ftp-trace.ncbi.nlm.nih.gov/ReferenceSamples/giab/data/AshkenazimTrio/HG002_NA24385_son/NIST_HiSeq_HG002_Homogeneity-10953946/HG002_HiSeq300x_fastq/140528_D00360_0018_AH8VC6ADXX/Project_RM8391_RM8392/Sample_2D2/2D2_GTCCGC_L002_R1_002.fastq.gz	Illumina WGS	HG002	Benchmark PSVGT on short reads
HG002	ftp://ftp-trace.ncbi.nlm.nih.gov/ReferenceSamples/giab/data/AshkenazimTrio/HG002_NA24385_son/NIST_HiSeq_HG002_Homogeneity-10953946/HG002_HiSeq300x_fastq/140528_D00360_0018_AH8VC6ADXX/Project_RM8391_RM8392/Sample_2F1/2F1_ACAGTG_L001_R1_001.fastq.gz	Illumina WGS	HG002	Benchmark PSVGT on short reads
HG002	ftp://ftp-trace.ncbi.nlm.nih.gov/ReferenceSamples/giab/data/AshkenazimTrio/HG002_NA24385_son/NIST_HiSeq_HG002_Homogeneity-10953946/HG002_HiSeq300x_fastq/140528_D00360_0018_AH8VC6ADXX/Project_RM8391_RM8392/Sample_2F1/2F1_ACAGTG_L001_R1_002.fastq.gz	Illumina WGS	HG002	Benchmark PSVGT on short reads
HG002	ftp://ftp-trace.ncbi.nlm.nih.gov/ReferenceSamples/giab/data/AshkenazimTrio/HG002_NA24385_son/NIST_HiSeq_HG002_Homogeneity-10953946/HG002_HiSeq300x_fastq/140528_D00360_0018_AH8VC6ADXX/Project_RM8391_RM8392/Sample_2F1/2F1_ACAGTG_L001_R1_003.fastq.gz	Illumina WGS	HG002	Benchmark PSVGT on short reads
HG002	ftp://ftp-trace.ncbi.nlm.nih.gov/ReferenceSamples/giab/data/AshkenazimTrio/HG002_NA24385_son/NIST_HiSeq_HG002_Homogeneity-10953946/HG002_HiSeq300x_fastq/140528_D00360_0018_AH8VC6ADXX/Project_RM8391_RM8392/Sample_2F1/2F1_ACAGTG_L001_R1_004.fastq.gz	Illumina WGS	HG002	Benchmark PSVGT on short reads
HG002	ftp://ftp-trace.ncbi.nlm.nih.gov/ReferenceSamples/giab/data/AshkenazimTrio/HG002_NA24385_son/NIST_HiSeq_HG002_Homogeneity-10953946/HG002_HiSeq300x_fastq/140528_D00360_0018_AH8VC6ADXX/Project_RM8391_RM8392/Sample_2F1/2F1_ACAGTG_L001_R1_005.fastq.gz	Illumina WGS	HG002	Benchmark PSVGT on short reads
HG002	ftp://ftp-trace.ncbi.nlm.nih.gov/ReferenceSamples/giab/data/AshkenazimTrio/HG002_NA24385_son/NIST_HiSeq_HG002_Homogeneity-10953946/HG002_HiSeq300x_fastq/140528_D00360_0018_AH8VC6ADXX/Project_RM8391_RM8392/Sample_2F1/2F1_ACAGTG_L001_R1_006.fastq.gz	Illumina WGS	HG002	Benchmark PSVGT on short reads
HG002	ftp://ftp-trace.ncbi.nlm.nih.gov/ReferenceSamples/giab/data/AshkenazimTrio/HG002_NA24385_son/NIST_HiSeq_HG002_Homogeneity-10953946/HG002_HiSeq300x_fastq/140528_D00360_0018_AH8VC6ADXX/Project_RM8391_RM8392/Sample_2F1/2F1_ACAGTG_L002_R1_001.fastq.gz	Illumina WGS	HG002	Benchmark PSVGT on short reads
HG002	ftp://ftp-trace.ncbi.nlm.nih.gov/ReferenceSamples/giab/data/AshkenazimTrio/HG002_NA24385_son/NIST_HiSeq_HG002_Homogeneity-10953946/HG002_HiSeq300x_fastq/140528_D00360_0018_AH8VC6ADXX/Project_RM8391_RM8392/Sample_2F1/2F1_ACAGTG_L002_R1_002.fastq.gz	Illumina WGS	HG002	Benchmark PSVGT on short reads
HG002	ftp://ftp-trace.ncbi.nlm.nih.gov/ReferenceSamples/giab/data/AshkenazimTrio/HG002_NA24385_son/NIST_HiSeq_HG002_Homogeneity-10953946/HG002_HiSeq300x_fastq/140528_D00360_0018_AH8VC6ADXX/Project_RM8391_RM8392/Sample_2F1/2F1_ACAGTG_L002_R1_003.fastq.gz	Illumina WGS	HG002	Benchmark PSVGT on short reads
HG002	ftp://ftp-trace.ncbi.nlm.nih.gov/ReferenceSamples/giab/data/AshkenazimTrio/HG002_NA24385_son/NIST_HiSeq_HG002_Homogeneity-10953946/HG002_HiSeq300x_fastq/140528_D00360_0018_AH8VC6ADXX/Project_RM8391_RM8392/Sample_2F1/2F1_ACAGTG_L002_R1_004.fastq.gz	Illumina WGS	HG002	Benchmark PSVGT on short reads
HG002	ftp://ftp-trace.ncbi.nlm.nih.gov/ReferenceSamples/giab/data/AshkenazimTrio/HG002_NA24385_son/NIST_HiSeq_HG002_Homogeneity-10953946/HG002_HiSeq300x_fastq/140528_D00360_0018_AH8VC6ADXX/Project_RM8391_RM8392/Sample_2F1/2F1_ACAGTG_L002_R1_005.fastq.gz	Illumina WGS	HG002	Benchmark PSVGT on short reads
HG002	ftp://ftp-trace.ncbi.nlm.nih.gov/ReferenceSamples/giab/data/AshkenazimTrio/HG002_NA24385_son/NIST_HiSeq_HG002_Homogeneity-10953946/HG002_HiSeq300x_fastq/140528_D00360_0018_AH8VC6ADXX/Project_RM8391_RM8392/Sample_2F1/2F1_ACAGTG_L002_R1_006.fastq.gz	Illumina WGS	HG002	Benchmark PSVGT on short reads
HG002	ftp://ftp-trace.ncbi.nlm.nih.gov/ReferenceSamples/giab/data/AshkenazimTrio/HG002_NA24385_son/NIST_HiSeq_HG002_Homogeneity-10953946/HG002_HiSeq300x_fastq/140528_D00360_0018_AH8VC6ADXX/Project_RM8391_RM8392/Sample_2F2/2F2_GCCAAT_L001_R1_001.fastq.gz	Illumina WGS	HG002	Benchmark PSVGT on short reads
HG002	ftp://ftp-trace.ncbi.nlm.nih.gov/ReferenceSamples/giab/data/AshkenazimTrio/HG002_NA24385_son/NIST_HiSeq_HG002_Homogeneity-10953946/HG002_HiSeq300x_fastq/140528_D00360_0018_AH8VC6ADXX/Project_RM8391_RM8392/Sample_2F2/2F2_GCCAAT_L001_R1_002.fastq.gz	Illumina WGS	HG002	Benchmark PSVGT on short reads
HG002	ftp://ftp-trace.ncbi.nlm.nih.gov/ReferenceSamples/giab/data/AshkenazimTrio/HG002_NA24385_son/NIST_HiSeq_HG002_Homogeneity-10953946/HG002_HiSeq300x_fastq/140528_D00360_0018_AH8VC6ADXX/Project_RM8391_RM8392/Sample_2F2/2F2_GCCAAT_L001_R1_003.fastq.gz	Illumina WGS	HG002	Benchmark PSVGT on short reads
HG002	ftp://ftp-trace.ncbi.nlm.nih.gov/ReferenceSamples/giab/data/AshkenazimTrio/HG002_NA24385_son/NIST_HiSeq_HG002_Homogeneity-10953946/HG002_HiSeq300x_fastq/140528_D00360_0018_AH8VC6ADXX/Project_RM8391_RM8392/Sample_2F2/2F2_GCCAAT_L001_R1_004.fastq.gz	Illumina WGS	HG002	Benchmark PSVGT on short reads
HG002	ftp://ftp-trace.ncbi.nlm.nih.gov/ReferenceSamples/giab/data/AshkenazimTrio/HG002_NA24385_son/NIST_HiSeq_HG002_Homogeneity-10953946/HG002_HiSeq300x_fastq/140528_D00360_0018_AH8VC6ADXX/Project_RM8391_RM8392/Sample_2F2/2F2_GCCAAT_L001_R1_005.fastq.gz	Illumina WGS	HG002	Benchmark PSVGT on short reads
HG002	ftp://ftp-trace.ncbi.nlm.nih.gov/ReferenceSamples/giab/data/AshkenazimTrio/HG002_NA24385_son/NIST_HiSeq_HG002_Homogeneity-10953946/HG002_HiSeq300x_fastq/140528_D00360_0018_AH8VC6ADXX/Project_RM8391_RM8392/Sample_2F2/2F2_GCCAAT_L001_R1_006.fastq.gz	Illumina WGS	HG002	Benchmark PSVGT on short reads
HG002	ftp://ftp-trace.ncbi.nlm.nih.gov/ReferenceSamples/giab/data/AshkenazimTrio/HG002_NA24385_son/NIST_HiSeq_HG002_Homogeneity-10953946/HG002_HiSeq300x_fastq/140528_D00360_0018_AH8VC6ADXX/Project_RM8391_RM8392/Sample_2F2/2F2_GCCAAT_L002_R1_001.fastq.gz	Illumina WGS	HG002	Benchmark PSVGT on short reads
HG002	ftp://ftp-trace.ncbi.nlm.nih.gov/ReferenceSamples/giab/data/AshkenazimTrio/HG002_NA24385_son/NIST_HiSeq_HG002_Homogeneity-10953946/HG002_HiSeq300x_fastq/140528_D00360_0018_AH8VC6ADXX/Project_RM8391_RM8392/Sample_2F2/2F2_GCCAAT_L002_R1_002.fastq.gz	Illumina WGS	HG002	Benchmark PSVGT on short reads
HG002	ftp://ftp-trace.ncbi.nlm.nih.gov/ReferenceSamples/giab/data/AshkenazimTrio/HG002_NA24385_son/NIST_HiSeq_HG002_Homogeneity-10953946/HG002_HiSeq300x_fastq/140528_D00360_0018_AH8VC6ADXX/Project_RM8391_RM8392/Sample_2F2/2F2_GCCAAT_L002_R1_003.fastq.gz	Illumina WGS	HG002	Benchmark PSVGT on short reads
HG002	ftp://ftp-trace.ncbi.nlm.nih.gov/ReferenceSamples/giab/data/AshkenazimTrio/HG002_NA24385_son/NIST_HiSeq_HG002_Homogeneity-10953946/HG002_HiSeq300x_fastq/140528_D00360_0018_AH8VC6ADXX/Project_RM8391_RM8392/Sample_2F2/2F2_GCCAAT_L002_R1_004.fastq.gz	Illumina WGS	HG002	Benchmark PSVGT on short reads
HG002	ftp://ftp-trace.ncbi.nlm.nih.gov/ReferenceSamples/giab/data/AshkenazimTrio/HG002_NA24385_son/NIST_HiSeq_HG002_Homogeneity-10953946/HG002_HiSeq300x_fastq/140528_D00360_0018_AH8VC6ADXX/Project_RM8391_RM8392/Sample_2F2/2F2_GCCAAT_L002_R1_005.fastq.gz	Illumina WGS	HG002	Benchmark PSVGT on short reads
HG002	ftp://ftp-trace.ncbi.nlm.nih.gov/ReferenceSamples/giab/data/AshkenazimTrio/HG002_NA24385_son/NIST_HiSeq_HG002_Homogeneity-10953946/HG002_HiSeq300x_fastq/140528_D00360_0018_AH8VC6ADXX/Project_RM8391_RM8392/Sample_2F2/2F2_GCCAAT_L002_R1_006.fastq.gz	Illumina WGS	HG002	Benchmark PSVGT on short reads
HG002	ftp://ftp-trace.ncbi.nlm.nih.gov/ReferenceSamples/giab/data/AshkenazimTrio/HG002_NA24385_son/NIST_HiSeq_HG002_Homogeneity-10953946/HG002_HiSeq300x_fastq/140528_D00360_0018_AH8VC6ADXX/Project_RM8391_RM8392/Sample_2L1/2L1_CTTGTA_L001_R1_001.fastq.gz	Illumina WGS	HG002	Benchmark PSVGT on short reads
HG002	ftp://ftp-trace.ncbi.nlm.nih.gov/ReferenceSamples/giab/data/AshkenazimTrio/HG002_NA24385_son/NIST_HiSeq_HG002_Homogeneity-10953946/HG002_HiSeq300x_fastq/140528_D00360_0018_AH8VC6ADXX/Project_RM8391_RM8392/Sample_2L1/2L1_CTTGTA_L001_R1_002.fastq.gz	Illumina WGS	HG002	Benchmark PSVGT on short reads
HG002	ftp://ftp-trace.ncbi.nlm.nih.gov/ReferenceSamples/giab/data/AshkenazimTrio/HG002_NA24385_son/NIST_HiSeq_HG002_Homogeneity-10953946/HG002_HiSeq300x_fastq/140528_D00360_0018_AH8VC6ADXX/Project_RM8391_RM8392/Sample_2L1/2L1_CTTGTA_L001_R1_003.fastq.gz	Illumina WGS	HG002	Benchmark PSVGT on short reads
HG002	ftp://ftp-trace.ncbi.nlm.nih.gov/ReferenceSamples/giab/data/AshkenazimTrio/HG002_NA24385_son/NIST_HiSeq_HG002_Homogeneity-10953946/HG002_HiSeq300x_fastq/140528_D00360_0018_AH8VC6ADXX/Project_RM8391_RM8392/Sample_2L1/2L1_CTTGTA_L001_R1_004.fastq.gz	Illumina WGS	HG002	Benchmark PSVGT on short reads
HG002	ftp://ftp-trace.ncbi.nlm.nih.gov/ReferenceSamples/giab/data/AshkenazimTrio/HG002_NA24385_son/NIST_HiSeq_HG002_Homogeneity-10953946/HG002_HiSeq300x_fastq/140528_D00360_0018_AH8VC6ADXX/Project_RM8391_RM8392/Sample_2L1/2L1_CTTGTA_L001_R1_005.fastq.gz	Illumina WGS	HG002	Benchmark PSVGT on short reads
HG002	ftp://ftp-trace.ncbi.nlm.nih.gov/ReferenceSamples/giab/data/AshkenazimTrio/HG002_NA24385_son/NIST_HiSeq_HG002_Homogeneity-10953946/HG002_HiSeq300x_fastq/140528_D00360_0018_AH8VC6ADXX/Project_RM8391_RM8392/Sample_2L1/2L1_CTTGTA_L001_R1_006.fastq.gz	Illumina WGS	HG002	Benchmark PSVGT on short reads
HG002	ftp://ftp-trace.ncbi.nlm.nih.gov/ReferenceSamples/giab/data/AshkenazimTrio/HG002_NA24385_son/NIST_HiSeq_HG002_Homogeneity-10953946/HG002_HiSeq300x_fastq/140528_D00360_0018_AH8VC6ADXX/Project_RM8391_RM8392/Sample_2L1/2L1_CTTGTA_L001_R1_007.fastq.gz	Illumina WGS	HG002	Benchmark PSVGT on short reads
HG002	ftp://ftp-trace.ncbi.nlm.nih.gov/ReferenceSamples/giab/data/AshkenazimTrio/HG002_NA24385_son/NIST_HiSeq_HG002_Homogeneity-10953946/HG002_HiSeq300x_fastq/140528_D00360_0018_AH8VC6ADXX/Project_RM8391_RM8392/Sample_2L1/2L1_CTTGTA_L002_R1_001.fastq.gz	Illumina WGS	HG002	Benchmark PSVGT on short reads
HG002	ftp://ftp-trace.ncbi.nlm.nih.gov/ReferenceSamples/giab/data/AshkenazimTrio/HG002_NA24385_son/NIST_HiSeq_HG002_Homogeneity-10953946/HG002_HiSeq300x_fastq/140528_D00360_0018_AH8VC6ADXX/Project_RM8391_RM8392/Sample_2L1/2L1_CTTGTA_L002_R1_002.fastq.gz	Illumina WGS	HG002	Benchmark PSVGT on short reads
HG002	ftp://ftp-trace.ncbi.nlm.nih.gov/ReferenceSamples/giab/data/AshkenazimTrio/HG002_NA24385_son/NIST_HiSeq_HG002_Homogeneity-10953946/HG002_HiSeq300x_fastq/140528_D00360_0018_AH8VC6ADXX/Project_RM8391_RM8392/Sample_2L1/2L1_CTTGTA_L002_R1_003.fastq.gz	Illumina WGS	HG002	Benchmark PSVGT on short reads
HG002	ftp://ftp-trace.ncbi.nlm.nih.gov/ReferenceSamples/giab/data/AshkenazimTrio/HG002_NA24385_son/NIST_HiSeq_HG002_Homogeneity-10953946/HG002_HiSeq300x_fastq/140528_D00360_0018_AH8VC6ADXX/Project_RM8391_RM8392/Sample_2L1/2L1_CTTGTA_L002_R1_004.fastq.gz	Illumina WGS	HG002	Benchmark PSVGT on short reads
HG002	ftp://ftp-trace.ncbi.nlm.nih.gov/ReferenceSamples/giab/data/AshkenazimTrio/HG002_NA24385_son/NIST_HiSeq_HG002_Homogeneity-10953946/HG002_HiSeq300x_fastq/140528_D00360_0018_AH8VC6ADXX/Project_RM8391_RM8392/Sample_2L1/2L1_CTTGTA_L002_R1_005.fastq.gz	Illumina WGS	HG002	Benchmark PSVGT on short reads
HG002	ftp://ftp-trace.ncbi.nlm.nih.gov/ReferenceSamples/giab/data/AshkenazimTrio/HG002_NA24385_son/NIST_HiSeq_HG002_Homogeneity-10953946/HG002_HiSeq300x_fastq/140528_D00360_0018_AH8VC6ADXX/Project_RM8391_RM8392/Sample_2L1/2L1_CTTGTA_L002_R1_006.fastq.gz	Illumina WGS	HG002	Benchmark PSVGT on short reads
HG002	ftp://ftp-trace.ncbi.nlm.nih.gov/ReferenceSamples/giab/data/AshkenazimTrio/HG002_NA24385_son/NIST_HiSeq_HG002_Homogeneity-10953946/HG002_HiSeq300x_fastq/140528_D00360_0018_AH8VC6ADXX/Project_RM8391_RM8392/Sample_2L1/2L1_CTTGTA_L002_R1_007.fastq.gz	Illumina WGS	HG002	Benchmark PSVGT on short reads
HG002	ftp://ftp-trace.ncbi.nlm.nih.gov/ReferenceSamples/giab/data/AshkenazimTrio/HG002_NA24385_son/NIST_HiSeq_HG002_Homogeneity-10953946/HG002_HiSeq300x_fastq/140528_D00360_0018_AH8VC6ADXX/Project_RM8391_RM8392/Sample_2L2/2L2_GTGAAA_L001_R1_001.fastq.gz	Illumina WGS	HG002	Benchmark PSVGT on short reads
HG002	ftp://ftp-trace.ncbi.nlm.nih.gov/ReferenceSamples/giab/data/AshkenazimTrio/HG002_NA24385_son/NIST_HiSeq_HG002_Homogeneity-10953946/HG002_HiSeq300x_fastq/140528_D00360_0018_AH8VC6ADXX/Project_RM8391_RM8392/Sample_2L2/2L2_GTGAAA_L001_R1_002.fastq.gz	Illumina WGS	HG002	Benchmark PSVGT on short reads
HG002	ftp://ftp-trace.ncbi.nlm.nih.gov/ReferenceSamples/giab/data/AshkenazimTrio/HG002_NA24385_son/NIST_HiSeq_HG002_Homogeneity-10953946/HG002_HiSeq300x_fastq/140528_D00360_0018_AH8VC6ADXX/Project_RM8391_RM8392/Sample_2L2/2L2_GTGAAA_L001_R1_003.fastq.gz	Illumina WGS	HG002	Benchmark PSVGT on short reads
HG002	ftp://ftp-trace.ncbi.nlm.nih.gov/ReferenceSamples/giab/data/AshkenazimTrio/HG002_NA24385_son/NIST_HiSeq_HG002_Homogeneity-10953946/HG002_HiSeq300x_fastq/140528_D00360_0018_AH8VC6ADXX/Project_RM8391_RM8392/Sample_2L2/2L2_GTGAAA_L001_R1_004.fastq.gz	Illumina WGS	HG002	Benchmark PSVGT on short reads
HG002	ftp://ftp-trace.ncbi.nlm.nih.gov/ReferenceSamples/giab/data/AshkenazimTrio/HG002_NA24385_son/NIST_HiSeq_HG002_Homogeneity-10953946/HG002_HiSeq300x_fastq/140528_D00360_0018_AH8VC6ADXX/Project_RM8391_RM8392/Sample_2L2/2L2_GTGAAA_L001_R1_005.fastq.gz	Illumina WGS	HG002	Benchmark PSVGT on short reads
HG002	ftp://ftp-trace.ncbi.nlm.nih.gov/ReferenceSamples/giab/data/AshkenazimTrio/HG002_NA24385_son/NIST_HiSeq_HG002_Homogeneity-10953946/HG002_HiSeq300x_fastq/140528_D00360_0018_AH8VC6ADXX/Project_RM8391_RM8392/Sample_2L2/2L2_GTGAAA_L001_R1_006.fastq.gz	Illumina WGS	HG002	Benchmark PSVGT on short reads
HG002	ftp://ftp-trace.ncbi.nlm.nih.gov/ReferenceSamples/giab/data/AshkenazimTrio/HG002_NA24385_son/NIST_HiSeq_HG002_Homogeneity-10953946/HG002_HiSeq300x_fastq/140528_D00360_0018_AH8VC6ADXX/Project_RM8391_RM8392/Sample_2L2/2L2_GTGAAA_L002_R1_001.fastq.gz	Illumina WGS	HG002	Benchmark PSVGT on short reads
HG002	ftp://ftp-trace.ncbi.nlm.nih.gov/ReferenceSamples/giab/data/AshkenazimTrio/HG002_NA24385_son/NIST_HiSeq_HG002_Homogeneity-10953946/HG002_HiSeq300x_fastq/140528_D00360_0018_AH8VC6ADXX/Project_RM8391_RM8392/Sample_2L2/2L2_GTGAAA_L002_R1_002.fastq.gz	Illumina WGS	HG002	Benchmark PSVGT on short reads
HG002	ftp://ftp-trace.ncbi.nlm.nih.gov/ReferenceSamples/giab/data/AshkenazimTrio/HG002_NA24385_son/NIST_HiSeq_HG002_Homogeneity-10953946/HG002_HiSeq300x_fastq/140528_D00360_0018_AH8VC6ADXX/Project_RM8391_RM8392/Sample_2L2/2L2_GTGAAA_L002_R1_003.fastq.gz	Illumina WGS	HG002	Benchmark PSVGT on short reads
HG002	ftp://ftp-trace.ncbi.nlm.nih.gov/ReferenceSamples/giab/data/AshkenazimTrio/HG002_NA24385_son/NIST_HiSeq_HG002_Homogeneity-10953946/HG002_HiSeq300x_fastq/140528_D00360_0018_AH8VC6ADXX/Project_RM8391_RM8392/Sample_2L2/2L2_GTGAAA_L002_R1_004.fastq.gz	Illumina WGS	HG002	Benchmark PSVGT on short reads
HG002	ftp://ftp-trace.ncbi.nlm.nih.gov/ReferenceSamples/giab/data/AshkenazimTrio/HG002_NA24385_son/NIST_HiSeq_HG002_Homogeneity-10953946/HG002_HiSeq300x_fastq/140528_D00360_0018_AH8VC6ADXX/Project_RM8391_RM8392/Sample_2L2/2L2_GTGAAA_L002_R1_005.fastq.gz	Illumina WGS	HG002	Benchmark PSVGT on short reads
HG002	ftp://ftp-trace.ncbi.nlm.nih.gov/ReferenceSamples/giab/data/AshkenazimTrio/HG002_NA24385_son/NIST_HiSeq_HG002_Homogeneity-10953946/HG002_HiSeq300x_fastq/140528_D00360_0018_AH8VC6ADXX/Project_RM8391_RM8392/Sample_2L2/2L2_GTGAAA_L002_R1_006.fastq.gz	Illumina WGS	HG002	Benchmark PSVGT on short reads
HG002	ftp://ftp-trace.ncbi.nlm.nih.gov/ReferenceSamples/giab/data/AshkenazimTrio/HG002_NA24385_son/NIST_HiSeq_HG002_Homogeneity-10953946/HG002_HiSeq300x_fastq/140528_D00360_0019_BH8VDAADXX/Project_RM8391_RM8392/Sample_2A1/2A1_CGATGT_L001_R1_001.fastq.gz	Illumina WGS	HG002	Benchmark PSVGT on short reads
HG002	ftp://ftp-trace.ncbi.nlm.nih.gov/ReferenceSamples/giab/data/AshkenazimTrio/HG002_NA24385_son/NIST_HiSeq_HG002_Homogeneity-10953946/HG002_HiSeq300x_fastq/140528_D00360_0019_BH8VDAADXX/Project_RM8391_RM8392/Sample_2A1/2A1_CGATGT_L002_R1_001.fastq.gz	Illumina WGS	HG002	Benchmark PSVGT on short reads
HG002	ftp://ftp-trace.ncbi.nlm.nih.gov/ReferenceSamples/giab/data/AshkenazimTrio/HG002_NA24385_son/NIST_HiSeq_HG002_Homogeneity-10953946/HG002_HiSeq300x_fastq/140528_D00360_0019_BH8VDAADXX/Project_RM8391_RM8392/Sample_2A2/2A2_TGACCA_L001_R1_001.fastq.gz	Illumina WGS	HG002	Benchmark PSVGT on short reads
HG002	ftp://ftp-trace.ncbi.nlm.nih.gov/ReferenceSamples/giab/data/AshkenazimTrio/HG002_NA24385_son/NIST_HiSeq_HG002_Homogeneity-10953946/HG002_HiSeq300x_fastq/140528_D00360_0019_BH8VDAADXX/Project_RM8391_RM8392/Sample_2A2/2A2_TGACCA_L002_R1_001.fastq.gz	Illumina WGS	HG002	Benchmark PSVGT on short reads
HG002	ftp://ftp-trace.ncbi.nlm.nih.gov/ReferenceSamples/giab/data/AshkenazimTrio/HG002_NA24385_son/NIST_HiSeq_HG002_Homogeneity-10953946/HG002_HiSeq300x_fastq/140528_D00360_0019_BH8VDAADXX/Project_RM8391_RM8392/Sample_2B1/2B1_CAGATC_L001_R1_001.fastq.gz	Illumina WGS	HG002	Benchmark PSVGT on short reads
HG002	ftp://ftp-trace.ncbi.nlm.nih.gov/ReferenceSamples/giab/data/AshkenazimTrio/HG002_NA24385_son/NIST_HiSeq_HG002_Homogeneity-10953946/HG002_HiSeq300x_fastq/140528_D00360_0019_BH8VDAADXX/Project_RM8391_RM8392/Sample_2B1/2B1_CAGATC_L001_R1_002.fastq.gz	Illumina WGS	HG002	Benchmark PSVGT on short reads
HG002	ftp://ftp-trace.ncbi.nlm.nih.gov/ReferenceSamples/giab/data/AshkenazimTrio/HG002_NA24385_son/NIST_HiSeq_HG002_Homogeneity-10953946/HG002_HiSeq300x_fastq/140528_D00360_0019_BH8VDAADXX/Project_RM8391_RM8392/Sample_2B1/2B1_CAGATC_L002_R1_001.fastq.gz	Illumina WGS	HG002	Benchmark PSVGT on short reads
HG002	ftp://ftp-trace.ncbi.nlm.nih.gov/ReferenceSamples/giab/data/AshkenazimTrio/HG002_NA24385_son/NIST_HiSeq_HG002_Homogeneity-10953946/HG002_HiSeq300x_fastq/140528_D00360_0019_BH8VDAADXX/Project_RM8391_RM8392/Sample_2B1/2B1_CAGATC_L002_R1_002.fastq.gz	Illumina WGS	HG002	Benchmark PSVGT on short reads
HG002	ftp://ftp-trace.ncbi.nlm.nih.gov/ReferenceSamples/giab/data/AshkenazimTrio/HG002_NA24385_son/NIST_HiSeq_HG002_Homogeneity-10953946/HG002_HiSeq300x_fastq/140528_D00360_0019_BH8VDAADXX/Project_RM8391_RM8392/Sample_2B2/2B2_CCGTCC_L001_R1_001.fastq.gz	Illumina WGS	HG002	Benchmark PSVGT on short reads
HG002	ftp://ftp-trace.ncbi.nlm.nih.gov/ReferenceSamples/giab/data/AshkenazimTrio/HG002_NA24385_son/NIST_HiSeq_HG002_Homogeneity-10953946/HG002_HiSeq300x_fastq/140528_D00360_0019_BH8VDAADXX/Project_RM8391_RM8392/Sample_2B2/2B2_CCGTCC_L001_R1_002.fastq.gz	Illumina WGS	HG002	Benchmark PSVGT on short reads
HG002	ftp://ftp-trace.ncbi.nlm.nih.gov/ReferenceSamples/giab/data/AshkenazimTrio/HG002_NA24385_son/NIST_HiSeq_HG002_Homogeneity-10953946/HG002_HiSeq300x_fastq/140528_D00360_0019_BH8VDAADXX/Project_RM8391_RM8392/Sample_2B2/2B2_CCGTCC_L002_R1_001.fastq.gz	Illumina WGS	HG002	Benchmark PSVGT on short reads
HG002	ftp://ftp-trace.ncbi.nlm.nih.gov/ReferenceSamples/giab/data/AshkenazimTrio/HG002_NA24385_son/NIST_HiSeq_HG002_Homogeneity-10953946/HG002_HiSeq300x_fastq/140528_D00360_0019_BH8VDAADXX/Project_RM8391_RM8392/Sample_2B2/2B2_CCGTCC_L002_R1_002.fastq.gz	Illumina WGS	HG002	Benchmark PSVGT on short reads
HG002	ftp://ftp-trace.ncbi.nlm.nih.gov/ReferenceSamples/giab/data/AshkenazimTrio/HG002_NA24385_son/NIST_HiSeq_HG002_Homogeneity-10953946/HG002_HiSeq300x_fastq/140528_D00360_0019_BH8VDAADXX/Project_RM8391_RM8392/Sample_2C1/2C1_AGTCAA_L001_R1_001.fastq.gz	Illumina WGS	HG002	Benchmark PSVGT on short reads
HG002	ftp://ftp-trace.ncbi.nlm.nih.gov/ReferenceSamples/giab/data/AshkenazimTrio/HG002_NA24385_son/NIST_HiSeq_HG002_Homogeneity-10953946/HG002_HiSeq300x_fastq/140528_D00360_0019_BH8VDAADXX/Project_RM8391_RM8392/Sample_2C1/2C1_AGTCAA_L002_R1_001.fastq.gz	Illumina WGS	HG002	Benchmark PSVGT on short reads
HG002	ftp://ftp-trace.ncbi.nlm.nih.gov/ReferenceSamples/giab/data/AshkenazimTrio/HG002_NA24385_son/NIST_HiSeq_HG002_Homogeneity-10953946/HG002_HiSeq300x_fastq/140528_D00360_0019_BH8VDAADXX/Project_RM8391_RM8392/Sample_2C2/2C2_AGTTCC_L001_R1_001.fastq.gz	Illumina WGS	HG002	Benchmark PSVGT on short reads
HG002	ftp://ftp-trace.ncbi.nlm.nih.gov/ReferenceSamples/giab/data/AshkenazimTrio/HG002_NA24385_son/NIST_HiSeq_HG002_Homogeneity-10953946/HG002_HiSeq300x_fastq/140528_D00360_0019_BH8VDAADXX/Project_RM8391_RM8392/Sample_2C2/2C2_AGTTCC_L002_R1_001.fastq.gz	Illumina WGS	HG002	Benchmark PSVGT on short reads
HG002	ftp://ftp-trace.ncbi.nlm.nih.gov/ReferenceSamples/giab/data/AshkenazimTrio/HG002_NA24385_son/NIST_HiSeq_HG002_Homogeneity-10953946/HG002_HiSeq300x_fastq/140528_D00360_0019_BH8VDAADXX/Project_RM8391_RM8392/Sample_2D1/2D1_ATGTCA_L001_R1_001.fastq.gz	Illumina WGS	HG002	Benchmark PSVGT on short reads
HG002	ftp://ftp-trace.ncbi.nlm.nih.gov/ReferenceSamples/giab/data/AshkenazimTrio/HG002_NA24385_son/NIST_HiSeq_HG002_Homogeneity-10953946/HG002_HiSeq300x_fastq/140528_D00360_0019_BH8VDAADXX/Project_RM8391_RM8392/Sample_2D1/2D1_ATGTCA_L002_R1_001.fastq.gz	Illumina WGS	HG002	Benchmark PSVGT on short reads
HG002	ftp://ftp-trace.ncbi.nlm.nih.gov/ReferenceSamples/giab/data/AshkenazimTrio/HG002_NA24385_son/NIST_HiSeq_HG002_Homogeneity-10953946/HG002_HiSeq300x_fastq/140528_D00360_0019_BH8VDAADXX/Project_RM8391_RM8392/Sample_2D2/2D2_GTCCGC_L001_R1_001.fastq.gz	Illumina WGS	HG002	Benchmark PSVGT on short reads
HG002	ftp://ftp-trace.ncbi.nlm.nih.gov/ReferenceSamples/giab/data/AshkenazimTrio/HG002_NA24385_son/NIST_HiSeq_HG002_Homogeneity-10953946/HG002_HiSeq300x_fastq/140528_D00360_0019_BH8VDAADXX/Project_RM8391_RM8392/Sample_2D2/2D2_GTCCGC_L002_R1_001.fastq.gz	Illumina WGS	HG002	Benchmark PSVGT on short reads
HG002	ftp://ftp-trace.ncbi.nlm.nih.gov/ReferenceSamples/giab/data/AshkenazimTrio/HG002_NA24385_son/NIST_HiSeq_HG002_Homogeneity-10953946/HG002_HiSeq300x_fastq/140528_D00360_0019_BH8VDAADXX/Project_RM8391_RM8392/Sample_2F1/2F1_ACAGTG_L001_R1_001.fastq.gz	Illumina WGS	HG002	Benchmark PSVGT on short reads
HG002	ftp://ftp-trace.ncbi.nlm.nih.gov/ReferenceSamples/giab/data/AshkenazimTrio/HG002_NA24385_son/NIST_HiSeq_HG002_Homogeneity-10953946/HG002_HiSeq300x_fastq/140528_D00360_0019_BH8VDAADXX/Project_RM8391_RM8392/Sample_2F1/2F1_ACAGTG_L001_R1_002.fastq.gz	Illumina WGS	HG002	Benchmark PSVGT on short reads
HG002	ftp://ftp-trace.ncbi.nlm.nih.gov/ReferenceSamples/giab/data/AshkenazimTrio/HG002_NA24385_son/NIST_HiSeq_HG002_Homogeneity-10953946/HG002_HiSeq300x_fastq/140528_D00360_0019_BH8VDAADXX/Project_RM8391_RM8392/Sample_2F1/2F1_ACAGTG_L001_R1_003.fastq.gz	Illumina WGS	HG002	Benchmark PSVGT on short reads
HG002	ftp://ftp-trace.ncbi.nlm.nih.gov/ReferenceSamples/giab/data/AshkenazimTrio/HG002_NA24385_son/NIST_HiSeq_HG002_Homogeneity-10953946/HG002_HiSeq300x_fastq/140528_D00360_0019_BH8VDAADXX/Project_RM8391_RM8392/Sample_2F1/2F1_ACAGTG_L001_R1_004.fastq.gz	Illumina WGS	HG002	Benchmark PSVGT on short reads
HG002	ftp://ftp-trace.ncbi.nlm.nih.gov/ReferenceSamples/giab/data/AshkenazimTrio/HG002_NA24385_son/NIST_HiSeq_HG002_Homogeneity-10953946/HG002_HiSeq300x_fastq/140528_D00360_0019_BH8VDAADXX/Project_RM8391_RM8392/Sample_2F1/2F1_ACAGTG_L002_R1_001.fastq.gz	Illumina WGS	HG002	Benchmark PSVGT on short reads
HG002	ftp://ftp-trace.ncbi.nlm.nih.gov/ReferenceSamples/giab/data/AshkenazimTrio/HG002_NA24385_son/NIST_HiSeq_HG002_Homogeneity-10953946/HG002_HiSeq300x_fastq/140528_D00360_0019_BH8VDAADXX/Project_RM8391_RM8392/Sample_2F1/2F1_ACAGTG_L002_R1_002.fastq.gz	Illumina WGS	HG002	Benchmark PSVGT on short reads
HG002	ftp://ftp-trace.ncbi.nlm.nih.gov/ReferenceSamples/giab/data/AshkenazimTrio/HG002_NA24385_son/NIST_HiSeq_HG002_Homogeneity-10953946/HG002_HiSeq300x_fastq/140528_D00360_0019_BH8VDAADXX/Project_RM8391_RM8392/Sample_2F1/2F1_ACAGTG_L002_R1_003.fastq.gz	Illumina WGS	HG002	Benchmark PSVGT on short reads
HG002	ftp://ftp-trace.ncbi.nlm.nih.gov/ReferenceSamples/giab/data/AshkenazimTrio/HG002_NA24385_son/NIST_HiSeq_HG002_Homogeneity-10953946/HG002_HiSeq300x_fastq/140528_D00360_0019_BH8VDAADXX/Project_RM8391_RM8392/Sample_2F1/2F1_ACAGTG_L002_R1_004.fastq.gz	Illumina WGS	HG002	Benchmark PSVGT on short reads
HG002	ftp://ftp-trace.ncbi.nlm.nih.gov/ReferenceSamples/giab/data/AshkenazimTrio/HG002_NA24385_son/NIST_HiSeq_HG002_Homogeneity-10953946/HG002_HiSeq300x_fastq/140528_D00360_0019_BH8VDAADXX/Project_RM8391_RM8392/Sample_2F2/2F2_GCCAAT_L001_R1_001.fastq.gz	Illumina WGS	HG002	Benchmark PSVGT on short reads
HG002	ftp://ftp-trace.ncbi.nlm.nih.gov/ReferenceSamples/giab/data/AshkenazimTrio/HG002_NA24385_son/NIST_HiSeq_HG002_Homogeneity-10953946/HG002_HiSeq300x_fastq/140528_D00360_0019_BH8VDAADXX/Project_RM8391_RM8392/Sample_2F2/2F2_GCCAAT_L001_R1_002.fastq.gz	Illumina WGS	HG002	Benchmark PSVGT on short reads
HG002	ftp://ftp-trace.ncbi.nlm.nih.gov/ReferenceSamples/giab/data/AshkenazimTrio/HG002_NA24385_son/NIST_HiSeq_HG002_Homogeneity-10953946/HG002_HiSeq300x_fastq/140528_D00360_0019_BH8VDAADXX/Project_RM8391_RM8392/Sample_2F2/2F2_GCCAAT_L001_R1_003.fastq.gz	Illumina WGS	HG002	Benchmark PSVGT on short reads
HG002	ftp://ftp-trace.ncbi.nlm.nih.gov/ReferenceSamples/giab/data/AshkenazimTrio/HG002_NA24385_son/NIST_HiSeq_HG002_Homogeneity-10953946/HG002_HiSeq300x_fastq/140528_D00360_0019_BH8VDAADXX/Project_RM8391_RM8392/Sample_2F2/2F2_GCCAAT_L001_R1_004.fastq.gz	Illumina WGS	HG002	Benchmark PSVGT on short reads
HG002	ftp://ftp-trace.ncbi.nlm.nih.gov/ReferenceSamples/giab/data/AshkenazimTrio/HG002_NA24385_son/NIST_HiSeq_HG002_Homogeneity-10953946/HG002_HiSeq300x_fastq/140528_D00360_0019_BH8VDAADXX/Project_RM8391_RM8392/Sample_2F2/2F2_GCCAAT_L002_R1_001.fastq.gz	Illumina WGS	HG002	Benchmark PSVGT on short reads
HG002	ftp://ftp-trace.ncbi.nlm.nih.gov/ReferenceSamples/giab/data/AshkenazimTrio/HG002_NA24385_son/NIST_HiSeq_HG002_Homogeneity-10953946/HG002_HiSeq300x_fastq/140528_D00360_0019_BH8VDAADXX/Project_RM8391_RM8392/Sample_2F2/2F2_GCCAAT_L002_R1_002.fastq.gz	Illumina WGS	HG002	Benchmark PSVGT on short reads
HG002	ftp://ftp-trace.ncbi.nlm.nih.gov/ReferenceSamples/giab/data/AshkenazimTrio/HG002_NA24385_son/NIST_HiSeq_HG002_Homogeneity-10953946/HG002_HiSeq300x_fastq/140528_D00360_0019_BH8VDAADXX/Project_RM8391_RM8392/Sample_2F2/2F2_GCCAAT_L002_R1_003.fastq.gz	Illumina WGS	HG002	Benchmark PSVGT on short reads
HG002	ftp://ftp-trace.ncbi.nlm.nih.gov/ReferenceSamples/giab/data/AshkenazimTrio/HG002_NA24385_son/NIST_HiSeq_HG002_Homogeneity-10953946/HG002_HiSeq300x_fastq/140528_D00360_0019_BH8VDAADXX/Project_RM8391_RM8392/Sample_2F2/2F2_GCCAAT_L002_R1_004.fastq.gz	Illumina WGS	HG002	Benchmark PSVGT on short reads
HG002	ftp://ftp-trace.ncbi.nlm.nih.gov/ReferenceSamples/giab/data/AshkenazimTrio/HG002_NA24385_son/NIST_HiSeq_HG002_Homogeneity-10953946/HG002_HiSeq300x_fastq/140528_D00360_0019_BH8VDAADXX/Project_RM8391_RM8392/Sample_2L1/2L1_CTTGTA_L001_R1_001.fastq.gz	Illumina WGS	HG002	Benchmark PSVGT on short reads
HG002	ftp://ftp-trace.ncbi.nlm.nih.gov/ReferenceSamples/giab/data/AshkenazimTrio/HG002_NA24385_son/NIST_HiSeq_HG002_Homogeneity-10953946/HG002_HiSeq300x_fastq/140528_D00360_0019_BH8VDAADXX/Project_RM8391_RM8392/Sample_2L1/2L1_CTTGTA_L001_R1_002.fastq.gz	Illumina WGS	HG002	Benchmark PSVGT on short reads
HG002	ftp://ftp-trace.ncbi.nlm.nih.gov/ReferenceSamples/giab/data/AshkenazimTrio/HG002_NA24385_son/NIST_HiSeq_HG002_Homogeneity-10953946/HG002_HiSeq300x_fastq/140528_D00360_0019_BH8VDAADXX/Project_RM8391_RM8392/Sample_2L1/2L1_CTTGTA_L001_R1_003.fastq.gz	Illumina WGS	HG002	Benchmark PSVGT on short reads
HG002	ftp://ftp-trace.ncbi.nlm.nih.gov/ReferenceSamples/giab/data/AshkenazimTrio/HG002_NA24385_son/NIST_HiSeq_HG002_Homogeneity-10953946/HG002_HiSeq300x_fastq/140528_D00360_0019_BH8VDAADXX/Project_RM8391_RM8392/Sample_2L1/2L1_CTTGTA_L001_R1_004.fastq.gz	Illumina WGS	HG002	Benchmark PSVGT on short reads
HG002	ftp://ftp-trace.ncbi.nlm.nih.gov/ReferenceSamples/giab/data/AshkenazimTrio/HG002_NA24385_son/NIST_HiSeq_HG002_Homogeneity-10953946/HG002_HiSeq300x_fastq/140528_D00360_0019_BH8VDAADXX/Project_RM8391_RM8392/Sample_2L1/2L1_CTTGTA_L002_R1_001.fastq.gz	Illumina WGS	HG002	Benchmark PSVGT on short reads
HG002	ftp://ftp-trace.ncbi.nlm.nih.gov/ReferenceSamples/giab/data/AshkenazimTrio/HG002_NA24385_son/NIST_HiSeq_HG002_Homogeneity-10953946/HG002_HiSeq300x_fastq/140528_D00360_0019_BH8VDAADXX/Project_RM8391_RM8392/Sample_2L1/2L1_CTTGTA_L002_R1_002.fastq.gz	Illumina WGS	HG002	Benchmark PSVGT on short reads
HG002	ftp://ftp-trace.ncbi.nlm.nih.gov/ReferenceSamples/giab/data/AshkenazimTrio/HG002_NA24385_son/NIST_HiSeq_HG002_Homogeneity-10953946/HG002_HiSeq300x_fastq/140528_D00360_0019_BH8VDAADXX/Project_RM8391_RM8392/Sample_2L1/2L1_CTTGTA_L002_R1_003.fastq.gz	Illumina WGS	HG002	Benchmark PSVGT on short reads
HG002	ftp://ftp-trace.ncbi.nlm.nih.gov/ReferenceSamples/giab/data/AshkenazimTrio/HG002_NA24385_son/NIST_HiSeq_HG002_Homogeneity-10953946/HG002_HiSeq300x_fastq/140528_D00360_0019_BH8VDAADXX/Project_RM8391_RM8392/Sample_2L1/2L1_CTTGTA_L002_R1_004.fastq.gz	Illumina WGS	HG002	Benchmark PSVGT on short reads
HG002	ftp://ftp-trace.ncbi.nlm.nih.gov/ReferenceSamples/giab/data/AshkenazimTrio/HG002_NA24385_son/NIST_HiSeq_HG002_Homogeneity-10953946/HG002_HiSeq300x_fastq/140528_D00360_0019_BH8VDAADXX/Project_RM8391_RM8392/Sample_2L2/2L2_GTGAAA_L001_R1_001.fastq.gz	Illumina WGS	HG002	Benchmark PSVGT on short reads
HG002	ftp://ftp-trace.ncbi.nlm.nih.gov/ReferenceSamples/giab/data/AshkenazimTrio/HG002_NA24385_son/NIST_HiSeq_HG002_Homogeneity-10953946/HG002_HiSeq300x_fastq/140528_D00360_0019_BH8VDAADXX/Project_RM8391_RM8392/Sample_2L2/2L2_GTGAAA_L001_R1_002.fastq.gz	Illumina WGS	HG002	Benchmark PSVGT on short reads
HG002	ftp://ftp-trace.ncbi.nlm.nih.gov/ReferenceSamples/giab/data/AshkenazimTrio/HG002_NA24385_son/NIST_HiSeq_HG002_Homogeneity-10953946/HG002_HiSeq300x_fastq/140528_D00360_0019_BH8VDAADXX/Project_RM8391_RM8392/Sample_2L2/2L2_GTGAAA_L001_R1_003.fastq.gz	Illumina WGS	HG002	Benchmark PSVGT on short reads
HG002	ftp://ftp-trace.ncbi.nlm.nih.gov/ReferenceSamples/giab/data/AshkenazimTrio/HG002_NA24385_son/NIST_HiSeq_HG002_Homogeneity-10953946/HG002_HiSeq300x_fastq/140528_D00360_0019_BH8VDAADXX/Project_RM8391_RM8392/Sample_2L2/2L2_GTGAAA_L001_R1_004.fastq.gz	Illumina WGS	HG002	Benchmark PSVGT on short reads
HG002	ftp://ftp-trace.ncbi.nlm.nih.gov/ReferenceSamples/giab/data/AshkenazimTrio/HG002_NA24385_son/NIST_HiSeq_HG002_Homogeneity-10953946/HG002_HiSeq300x_fastq/140528_D00360_0019_BH8VDAADXX/Project_RM8391_RM8392/Sample_2L2/2L2_GTGAAA_L002_R1_001.fastq.gz	Illumina WGS	HG002	Benchmark PSVGT on short reads
HG002	ftp://ftp-trace.ncbi.nlm.nih.gov/ReferenceSamples/giab/data/AshkenazimTrio/HG002_NA24385_son/NIST_HiSeq_HG002_Homogeneity-10953946/HG002_HiSeq300x_fastq/140528_D00360_0019_BH8VDAADXX/Project_RM8391_RM8392/Sample_2L2/2L2_GTGAAA_L002_R1_002.fastq.gz	Illumina WGS	HG002	Benchmark PSVGT on short reads
HG002	ftp://ftp-trace.ncbi.nlm.nih.gov/ReferenceSamples/giab/data/AshkenazimTrio/HG002_NA24385_son/NIST_HiSeq_HG002_Homogeneity-10953946/HG002_HiSeq300x_fastq/140528_D00360_0019_BH8VDAADXX/Project_RM8391_RM8392/Sample_2L2/2L2_GTGAAA_L002_R1_003.fastq.gz	Illumina WGS	HG002	Benchmark PSVGT on short reads
HG002	ftp://ftp-trace.ncbi.nlm.nih.gov/ReferenceSamples/giab/data/AshkenazimTrio/HG002_NA24385_son/NIST_HiSeq_HG002_Homogeneity-10953946/HG002_HiSeq300x_fastq/140528_D00360_0019_BH8VDAADXX/Project_RM8391_RM8392/Sample_2L2/2L2_GTGAAA_L002_R1_004.fastq.gz	Illumina WGS	HG002	Benchmark PSVGT on short reads
HG002	ftp://ftp-trace.ncbi.nlm.nih.gov/ReferenceSamples/giab/data/AshkenazimTrio/HG002_NA24385_son/NIST_HiSeq_HG002_Homogeneity-10953946/HG002_HiSeq300x_fastq/140605_D00360_0020_AH9V1RADXX/Project_RM8391_RM8392/Sample_2A1/2A1_CGATGT_L001_R1_001.fastq.gz	Illumina WGS	HG002	Benchmark PSVGT on short reads
HG002	ftp://ftp-trace.ncbi.nlm.nih.gov/ReferenceSamples/giab/data/AshkenazimTrio/HG002_NA24385_son/NIST_HiSeq_HG002_Homogeneity-10953946/HG002_HiSeq300x_fastq/140605_D00360_0020_AH9V1RADXX/Project_RM8391_RM8392/Sample_2A1/2A1_CGATGT_L001_R1_002.fastq.gz	Illumina WGS	HG002	Benchmark PSVGT on short reads
HG002	ftp://ftp-trace.ncbi.nlm.nih.gov/ReferenceSamples/giab/data/AshkenazimTrio/HG002_NA24385_son/NIST_HiSeq_HG002_Homogeneity-10953946/HG002_HiSeq300x_fastq/140605_D00360_0020_AH9V1RADXX/Project_RM8391_RM8392/Sample_2A1/2A1_CGATGT_L002_R1_001.fastq.gz	Illumina WGS	HG002	Benchmark PSVGT on short reads
HG002	ftp://ftp-trace.ncbi.nlm.nih.gov/ReferenceSamples/giab/data/AshkenazimTrio/HG002_NA24385_son/NIST_HiSeq_HG002_Homogeneity-10953946/HG002_HiSeq300x_fastq/140605_D00360_0020_AH9V1RADXX/Project_RM8391_RM8392/Sample_2A1/2A1_CGATGT_L002_R1_002.fastq.gz	Illumina WGS	HG002	Benchmark PSVGT on short reads
HG002	ftp://ftp-trace.ncbi.nlm.nih.gov/ReferenceSamples/giab/data/AshkenazimTrio/HG002_NA24385_son/NIST_HiSeq_HG002_Homogeneity-10953946/HG002_HiSeq300x_fastq/140605_D00360_0020_AH9V1RADXX/Project_RM8391_RM8392/Sample_2A2/2A2_TGACCA_L001_R1_001.fastq.gz	Illumina WGS	HG002	Benchmark PSVGT on short reads
HG002	ftp://ftp-trace.ncbi.nlm.nih.gov/ReferenceSamples/giab/data/AshkenazimTrio/HG002_NA24385_son/NIST_HiSeq_HG002_Homogeneity-10953946/HG002_HiSeq300x_fastq/140605_D00360_0020_AH9V1RADXX/Project_RM8391_RM8392/Sample_2A2/2A2_TGACCA_L001_R1_002.fastq.gz	Illumina WGS	HG002	Benchmark PSVGT on short reads
HG002	ftp://ftp-trace.ncbi.nlm.nih.gov/ReferenceSamples/giab/data/AshkenazimTrio/HG002_NA24385_son/NIST_HiSeq_HG002_Homogeneity-10953946/HG002_HiSeq300x_fastq/140605_D00360_0020_AH9V1RADXX/Project_RM8391_RM8392/Sample_2A2/2A2_TGACCA_L002_R1_001.fastq.gz	Illumina WGS	HG002	Benchmark PSVGT on short reads
HG002	ftp://ftp-trace.ncbi.nlm.nih.gov/ReferenceSamples/giab/data/AshkenazimTrio/HG002_NA24385_son/NIST_HiSeq_HG002_Homogeneity-10953946/HG002_HiSeq300x_fastq/140605_D00360_0020_AH9V1RADXX/Project_RM8391_RM8392/Sample_2A2/2A2_TGACCA_L002_R1_002.fastq.gz	Illumina WGS	HG002	Benchmark PSVGT on short reads
HG002	ftp://ftp-trace.ncbi.nlm.nih.gov/ReferenceSamples/giab/data/AshkenazimTrio/HG002_NA24385_son/NIST_HiSeq_HG002_Homogeneity-10953946/HG002_HiSeq300x_fastq/140605_D00360_0020_AH9V1RADXX/Project_RM8391_RM8392/Sample_2B1/2B1_CAGATC_L001_R1_001.fastq.gz	Illumina WGS	HG002	Benchmark PSVGT on short reads
HG002	ftp://ftp-trace.ncbi.nlm.nih.gov/ReferenceSamples/giab/data/AshkenazimTrio/HG002_NA24385_son/NIST_HiSeq_HG002_Homogeneity-10953946/HG002_HiSeq300x_fastq/140605_D00360_0020_AH9V1RADXX/Project_RM8391_RM8392/Sample_2B1/2B1_CAGATC_L001_R1_002.fastq.gz	Illumina WGS	HG002	Benchmark PSVGT on short reads
HG002	ftp://ftp-trace.ncbi.nlm.nih.gov/ReferenceSamples/giab/data/AshkenazimTrio/HG002_NA24385_son/NIST_HiSeq_HG002_Homogeneity-10953946/HG002_HiSeq300x_fastq/140605_D00360_0020_AH9V1RADXX/Project_RM8391_RM8392/Sample_2B1/2B1_CAGATC_L002_R1_001.fastq.gz	Illumina WGS	HG002	Benchmark PSVGT on short reads
HG002	ftp://ftp-trace.ncbi.nlm.nih.gov/ReferenceSamples/giab/data/AshkenazimTrio/HG002_NA24385_son/NIST_HiSeq_HG002_Homogeneity-10953946/HG002_HiSeq300x_fastq/140605_D00360_0020_AH9V1RADXX/Project_RM8391_RM8392/Sample_2B1/2B1_CAGATC_L002_R1_002.fastq.gz	Illumina WGS	HG002	Benchmark PSVGT on short reads
HG002	ftp://ftp-trace.ncbi.nlm.nih.gov/ReferenceSamples/giab/data/AshkenazimTrio/HG002_NA24385_son/NIST_HiSeq_HG002_Homogeneity-10953946/HG002_HiSeq300x_fastq/140605_D00360_0020_AH9V1RADXX/Project_RM8391_RM8392/Sample_2B2/2B2_CCGTCC_L001_R1_001.fastq.gz	Illumina WGS	HG002	Benchmark PSVGT on short reads
HG002	ftp://ftp-trace.ncbi.nlm.nih.gov/ReferenceSamples/giab/data/AshkenazimTrio/HG002_NA24385_son/NIST_HiSeq_HG002_Homogeneity-10953946/HG002_HiSeq300x_fastq/140605_D00360_0020_AH9V1RADXX/Project_RM8391_RM8392/Sample_2B2/2B2_CCGTCC_L001_R1_002.fastq.gz	Illumina WGS	HG002	Benchmark PSVGT on short reads
HG002	ftp://ftp-trace.ncbi.nlm.nih.gov/ReferenceSamples/giab/data/AshkenazimTrio/HG002_NA24385_son/NIST_HiSeq_HG002_Homogeneity-10953946/HG002_HiSeq300x_fastq/140605_D00360_0020_AH9V1RADXX/Project_RM8391_RM8392/Sample_2B2/2B2_CCGTCC_L002_R1_001.fastq.gz	Illumina WGS	HG002	Benchmark PSVGT on short reads
HG002	ftp://ftp-trace.ncbi.nlm.nih.gov/ReferenceSamples/giab/data/AshkenazimTrio/HG002_NA24385_son/NIST_HiSeq_HG002_Homogeneity-10953946/HG002_HiSeq300x_fastq/140605_D00360_0020_AH9V1RADXX/Project_RM8391_RM8392/Sample_2B2/2B2_CCGTCC_L002_R1_002.fastq.gz	Illumina WGS	HG002	Benchmark PSVGT on short reads
HG002	ftp://ftp-trace.ncbi.nlm.nih.gov/ReferenceSamples/giab/data/AshkenazimTrio/HG002_NA24385_son/NIST_HiSeq_HG002_Homogeneity-10953946/HG002_HiSeq300x_fastq/140605_D00360_0020_AH9V1RADXX/Project_RM8391_RM8392/Sample_2C1/2C1_AGTCAA_L001_R1_001.fastq.gz	Illumina WGS	HG002	Benchmark PSVGT on short reads
HG002	ftp://ftp-trace.ncbi.nlm.nih.gov/ReferenceSamples/giab/data/AshkenazimTrio/HG002_NA24385_son/NIST_HiSeq_HG002_Homogeneity-10953946/HG002_HiSeq300x_fastq/140605_D00360_0020_AH9V1RADXX/Project_RM8391_RM8392/Sample_2C1/2C1_AGTCAA_L001_R1_002.fastq.gz	Illumina WGS	HG002	Benchmark PSVGT on short reads
HG002	ftp://ftp-trace.ncbi.nlm.nih.gov/ReferenceSamples/giab/data/AshkenazimTrio/HG002_NA24385_son/NIST_HiSeq_HG002_Homogeneity-10953946/HG002_HiSeq300x_fastq/140605_D00360_0020_AH9V1RADXX/Project_RM8391_RM8392/Sample_2C1/2C1_AGTCAA_L002_R1_001.fastq.gz	Illumina WGS	HG002	Benchmark PSVGT on short reads
HG002	ftp://ftp-trace.ncbi.nlm.nih.gov/ReferenceSamples/giab/data/AshkenazimTrio/HG002_NA24385_son/NIST_HiSeq_HG002_Homogeneity-10953946/HG002_HiSeq300x_fastq/140605_D00360_0020_AH9V1RADXX/Project_RM8391_RM8392/Sample_2C1/2C1_AGTCAA_L002_R1_002.fastq.gz	Illumina WGS	HG002	Benchmark PSVGT on short reads
HG002	ftp://ftp-trace.ncbi.nlm.nih.gov/ReferenceSamples/giab/data/AshkenazimTrio/HG002_NA24385_son/NIST_HiSeq_HG002_Homogeneity-10953946/HG002_HiSeq300x_fastq/140605_D00360_0020_AH9V1RADXX/Project_RM8391_RM8392/Sample_2C2/2C2_AGTTCC_L001_R1_001.fastq.gz	Illumina WGS	HG002	Benchmark PSVGT on short reads
HG002	ftp://ftp-trace.ncbi.nlm.nih.gov/ReferenceSamples/giab/data/AshkenazimTrio/HG002_NA24385_son/NIST_HiSeq_HG002_Homogeneity-10953946/HG002_HiSeq300x_fastq/140605_D00360_0020_AH9V1RADXX/Project_RM8391_RM8392/Sample_2C2/2C2_AGTTCC_L001_R1_002.fastq.gz	Illumina WGS	HG002	Benchmark PSVGT on short reads
HG002	ftp://ftp-trace.ncbi.nlm.nih.gov/ReferenceSamples/giab/data/AshkenazimTrio/HG002_NA24385_son/NIST_HiSeq_HG002_Homogeneity-10953946/HG002_HiSeq300x_fastq/140605_D00360_0020_AH9V1RADXX/Project_RM8391_RM8392/Sample_2C2/2C2_AGTTCC_L002_R1_001.fastq.gz	Illumina WGS	HG002	Benchmark PSVGT on short reads
HG002	ftp://ftp-trace.ncbi.nlm.nih.gov/ReferenceSamples/giab/data/AshkenazimTrio/HG002_NA24385_son/NIST_HiSeq_HG002_Homogeneity-10953946/HG002_HiSeq300x_fastq/140605_D00360_0020_AH9V1RADXX/Project_RM8391_RM8392/Sample_2C2/2C2_AGTTCC_L002_R1_002.fastq.gz	Illumina WGS	HG002	Benchmark PSVGT on short reads
HG002	ftp://ftp-trace.ncbi.nlm.nih.gov/ReferenceSamples/giab/data/AshkenazimTrio/HG002_NA24385_son/NIST_HiSeq_HG002_Homogeneity-10953946/HG002_HiSeq300x_fastq/140605_D00360_0020_AH9V1RADXX/Project_RM8391_RM8392/Sample_2D1/2D1_ATGTCA_L001_R1_001.fastq.gz	Illumina WGS	HG002	Benchmark PSVGT on short reads
HG002	ftp://ftp-trace.ncbi.nlm.nih.gov/ReferenceSamples/giab/data/AshkenazimTrio/HG002_NA24385_son/NIST_HiSeq_HG002_Homogeneity-10953946/HG002_HiSeq300x_fastq/140605_D00360_0020_AH9V1RADXX/Project_RM8391_RM8392/Sample_2D1/2D1_ATGTCA_L001_R1_002.fastq.gz	Illumina WGS	HG002	Benchmark PSVGT on short reads
HG002	ftp://ftp-trace.ncbi.nlm.nih.gov/ReferenceSamples/giab/data/AshkenazimTrio/HG002_NA24385_son/NIST_HiSeq_HG002_Homogeneity-10953946/HG002_HiSeq300x_fastq/140605_D00360_0020_AH9V1RADXX/Project_RM8391_RM8392/Sample_2D1/2D1_ATGTCA_L002_R1_001.fastq.gz	Illumina WGS	HG002	Benchmark PSVGT on short reads
HG002	ftp://ftp-trace.ncbi.nlm.nih.gov/ReferenceSamples/giab/data/AshkenazimTrio/HG002_NA24385_son/NIST_HiSeq_HG002_Homogeneity-10953946/HG002_HiSeq300x_fastq/140605_D00360_0020_AH9V1RADXX/Project_RM8391_RM8392/Sample_2D1/2D1_ATGTCA_L002_R1_002.fastq.gz	Illumina WGS	HG002	Benchmark PSVGT on short reads
HG002	ftp://ftp-trace.ncbi.nlm.nih.gov/ReferenceSamples/giab/data/AshkenazimTrio/HG002_NA24385_son/NIST_HiSeq_HG002_Homogeneity-10953946/HG002_HiSeq300x_fastq/140605_D00360_0020_AH9V1RADXX/Project_RM8391_RM8392/Sample_2D2/2D2_GTCCGC_L001_R1_001.fastq.gz	Illumina WGS	HG002	Benchmark PSVGT on short reads
HG002	ftp://ftp-trace.ncbi.nlm.nih.gov/ReferenceSamples/giab/data/AshkenazimTrio/HG002_NA24385_son/NIST_HiSeq_HG002_Homogeneity-10953946/HG002_HiSeq300x_fastq/140605_D00360_0020_AH9V1RADXX/Project_RM8391_RM8392/Sample_2D2/2D2_GTCCGC_L001_R1_002.fastq.gz	Illumina WGS	HG002	Benchmark PSVGT on short reads
HG002	ftp://ftp-trace.ncbi.nlm.nih.gov/ReferenceSamples/giab/data/AshkenazimTrio/HG002_NA24385_son/NIST_HiSeq_HG002_Homogeneity-10953946/HG002_HiSeq300x_fastq/140605_D00360_0020_AH9V1RADXX/Project_RM8391_RM8392/Sample_2D2/2D2_GTCCGC_L002_R1_001.fastq.gz	Illumina WGS	HG002	Benchmark PSVGT on short reads
HG002	ftp://ftp-trace.ncbi.nlm.nih.gov/ReferenceSamples/giab/data/AshkenazimTrio/HG002_NA24385_son/NIST_HiSeq_HG002_Homogeneity-10953946/HG002_HiSeq300x_fastq/140605_D00360_0020_AH9V1RADXX/Project_RM8391_RM8392/Sample_2D2/2D2_GTCCGC_L002_R1_002.fastq.gz	Illumina WGS	HG002	Benchmark PSVGT on short reads
HG002	ftp://ftp-trace.ncbi.nlm.nih.gov/ReferenceSamples/giab/data/AshkenazimTrio/HG002_NA24385_son/NIST_HiSeq_HG002_Homogeneity-10953946/HG002_HiSeq300x_fastq/140605_D00360_0020_AH9V1RADXX/Project_RM8391_RM8392/Sample_2F1/2F1_ACAGTG_L001_R1_001.fastq.gz	Illumina WGS	HG002	Benchmark PSVGT on short reads
HG002	ftp://ftp-trace.ncbi.nlm.nih.gov/ReferenceSamples/giab/data/AshkenazimTrio/HG002_NA24385_son/NIST_HiSeq_HG002_Homogeneity-10953946/HG002_HiSeq300x_fastq/140605_D00360_0020_AH9V1RADXX/Project_RM8391_RM8392/Sample_2F1/2F1_ACAGTG_L001_R1_002.fastq.gz	Illumina WGS	HG002	Benchmark PSVGT on short reads
HG002	ftp://ftp-trace.ncbi.nlm.nih.gov/ReferenceSamples/giab/data/AshkenazimTrio/HG002_NA24385_son/NIST_HiSeq_HG002_Homogeneity-10953946/HG002_HiSeq300x_fastq/140605_D00360_0020_AH9V1RADXX/Project_RM8391_RM8392/Sample_2F1/2F1_ACAGTG_L001_R1_003.fastq.gz	Illumina WGS	HG002	Benchmark PSVGT on short reads
HG002	ftp://ftp-trace.ncbi.nlm.nih.gov/ReferenceSamples/giab/data/AshkenazimTrio/HG002_NA24385_son/NIST_HiSeq_HG002_Homogeneity-10953946/HG002_HiSeq300x_fastq/140605_D00360_0020_AH9V1RADXX/Project_RM8391_RM8392/Sample_2F1/2F1_ACAGTG_L001_R1_004.fastq.gz	Illumina WGS	HG002	Benchmark PSVGT on short reads
HG002	ftp://ftp-trace.ncbi.nlm.nih.gov/ReferenceSamples/giab/data/AshkenazimTrio/HG002_NA24385_son/NIST_HiSeq_HG002_Homogeneity-10953946/HG002_HiSeq300x_fastq/140605_D00360_0020_AH9V1RADXX/Project_RM8391_RM8392/Sample_2F1/2F1_ACAGTG_L001_R1_005.fastq.gz	Illumina WGS	HG002	Benchmark PSVGT on short reads
HG002	ftp://ftp-trace.ncbi.nlm.nih.gov/ReferenceSamples/giab/data/AshkenazimTrio/HG002_NA24385_son/NIST_HiSeq_HG002_Homogeneity-10953946/HG002_HiSeq300x_fastq/140605_D00360_0020_AH9V1RADXX/Project_RM8391_RM8392/Sample_2F1/2F1_ACAGTG_L001_R1_006.fastq.gz	Illumina WGS	HG002	Benchmark PSVGT on short reads
HG002	ftp://ftp-trace.ncbi.nlm.nih.gov/ReferenceSamples/giab/data/AshkenazimTrio/HG002_NA24385_son/NIST_HiSeq_HG002_Homogeneity-10953946/HG002_HiSeq300x_fastq/140605_D00360_0020_AH9V1RADXX/Project_RM8391_RM8392/Sample_2F1/2F1_ACAGTG_L002_R1_001.fastq.gz	Illumina WGS	HG002	Benchmark PSVGT on short reads
HG002	ftp://ftp-trace.ncbi.nlm.nih.gov/ReferenceSamples/giab/data/AshkenazimTrio/HG002_NA24385_son/NIST_HiSeq_HG002_Homogeneity-10953946/HG002_HiSeq300x_fastq/140605_D00360_0020_AH9V1RADXX/Project_RM8391_RM8392/Sample_2F1/2F1_ACAGTG_L002_R1_002.fastq.gz	Illumina WGS	HG002	Benchmark PSVGT on short reads
HG002	ftp://ftp-trace.ncbi.nlm.nih.gov/ReferenceSamples/giab/data/AshkenazimTrio/HG002_NA24385_son/NIST_HiSeq_HG002_Homogeneity-10953946/HG002_HiSeq300x_fastq/140605_D00360_0020_AH9V1RADXX/Project_RM8391_RM8392/Sample_2F1/2F1_ACAGTG_L002_R1_003.fastq.gz	Illumina WGS	HG002	Benchmark PSVGT on short reads
HG002	ftp://ftp-trace.ncbi.nlm.nih.gov/ReferenceSamples/giab/data/AshkenazimTrio/HG002_NA24385_son/NIST_HiSeq_HG002_Homogeneity-10953946/HG002_HiSeq300x_fastq/140605_D00360_0020_AH9V1RADXX/Project_RM8391_RM8392/Sample_2F1/2F1_ACAGTG_L002_R1_004.fastq.gz	Illumina WGS	HG002	Benchmark PSVGT on short reads
HG002	ftp://ftp-trace.ncbi.nlm.nih.gov/ReferenceSamples/giab/data/AshkenazimTrio/HG002_NA24385_son/NIST_HiSeq_HG002_Homogeneity-10953946/HG002_HiSeq300x_fastq/140605_D00360_0020_AH9V1RADXX/Project_RM8391_RM8392/Sample_2F1/2F1_ACAGTG_L002_R1_005.fastq.gz	Illumina WGS	HG002	Benchmark PSVGT on short reads
HG002	ftp://ftp-trace.ncbi.nlm.nih.gov/ReferenceSamples/giab/data/AshkenazimTrio/HG002_NA24385_son/NIST_HiSeq_HG002_Homogeneity-10953946/HG002_HiSeq300x_fastq/140605_D00360_0020_AH9V1RADXX/Project_RM8391_RM8392/Sample_2F1/2F1_ACAGTG_L002_R1_006.fastq.gz	Illumina WGS	HG002	Benchmark PSVGT on short reads
HG002	ftp://ftp-trace.ncbi.nlm.nih.gov/ReferenceSamples/giab/data/AshkenazimTrio/HG002_NA24385_son/NIST_HiSeq_HG002_Homogeneity-10953946/HG002_HiSeq300x_fastq/140605_D00360_0020_AH9V1RADXX/Project_RM8391_RM8392/Sample_2F2/2F2_GCCAAT_L001_R1_001.fastq.gz	Illumina WGS	HG002	Benchmark PSVGT on short reads
HG002	ftp://ftp-trace.ncbi.nlm.nih.gov/ReferenceSamples/giab/data/AshkenazimTrio/HG002_NA24385_son/NIST_HiSeq_HG002_Homogeneity-10953946/HG002_HiSeq300x_fastq/140605_D00360_0020_AH9V1RADXX/Project_RM8391_RM8392/Sample_2F2/2F2_GCCAAT_L001_R1_002.fastq.gz	Illumina WGS	HG002	Benchmark PSVGT on short reads
HG002	ftp://ftp-trace.ncbi.nlm.nih.gov/ReferenceSamples/giab/data/AshkenazimTrio/HG002_NA24385_son/NIST_HiSeq_HG002_Homogeneity-10953946/HG002_HiSeq300x_fastq/140605_D00360_0020_AH9V1RADXX/Project_RM8391_RM8392/Sample_2F2/2F2_GCCAAT_L001_R1_003.fastq.gz	Illumina WGS	HG002	Benchmark PSVGT on short reads
HG002	ftp://ftp-trace.ncbi.nlm.nih.gov/ReferenceSamples/giab/data/AshkenazimTrio/HG002_NA24385_son/NIST_HiSeq_HG002_Homogeneity-10953946/HG002_HiSeq300x_fastq/140605_D00360_0020_AH9V1RADXX/Project_RM8391_RM8392/Sample_2F2/2F2_GCCAAT_L001_R1_004.fastq.gz	Illumina WGS	HG002	Benchmark PSVGT on short reads
HG002	ftp://ftp-trace.ncbi.nlm.nih.gov/ReferenceSamples/giab/data/AshkenazimTrio/HG002_NA24385_son/NIST_HiSeq_HG002_Homogeneity-10953946/HG002_HiSeq300x_fastq/140605_D00360_0020_AH9V1RADXX/Project_RM8391_RM8392/Sample_2F2/2F2_GCCAAT_L001_R1_005.fastq.gz	Illumina WGS	HG002	Benchmark PSVGT on short reads
HG002	ftp://ftp-trace.ncbi.nlm.nih.gov/ReferenceSamples/giab/data/AshkenazimTrio/HG002_NA24385_son/NIST_HiSeq_HG002_Homogeneity-10953946/HG002_HiSeq300x_fastq/140605_D00360_0020_AH9V1RADXX/Project_RM8391_RM8392/Sample_2F2/2F2_GCCAAT_L001_R1_006.fastq.gz	Illumina WGS	HG002	Benchmark PSVGT on short reads
HG002	ftp://ftp-trace.ncbi.nlm.nih.gov/ReferenceSamples/giab/data/AshkenazimTrio/HG002_NA24385_son/NIST_HiSeq_HG002_Homogeneity-10953946/HG002_HiSeq300x_fastq/140605_D00360_0020_AH9V1RADXX/Project_RM8391_RM8392/Sample_2F2/2F2_GCCAAT_L002_R1_001.fastq.gz	Illumina WGS	HG002	Benchmark PSVGT on short reads
HG002	ftp://ftp-trace.ncbi.nlm.nih.gov/ReferenceSamples/giab/data/AshkenazimTrio/HG002_NA24385_son/NIST_HiSeq_HG002_Homogeneity-10953946/HG002_HiSeq300x_fastq/140605_D00360_0020_AH9V1RADXX/Project_RM8391_RM8392/Sample_2F2/2F2_GCCAAT_L002_R1_002.fastq.gz	Illumina WGS	HG002	Benchmark PSVGT on short reads
HG002	ftp://ftp-trace.ncbi.nlm.nih.gov/ReferenceSamples/giab/data/AshkenazimTrio/HG002_NA24385_son/NIST_HiSeq_HG002_Homogeneity-10953946/HG002_HiSeq300x_fastq/140605_D00360_0020_AH9V1RADXX/Project_RM8391_RM8392/Sample_2F2/2F2_GCCAAT_L002_R1_003.fastq.gz	Illumina WGS	HG002	Benchmark PSVGT on short reads
HG002	ftp://ftp-trace.ncbi.nlm.nih.gov/ReferenceSamples/giab/data/AshkenazimTrio/HG002_NA24385_son/NIST_HiSeq_HG002_Homogeneity-10953946/HG002_HiSeq300x_fastq/140605_D00360_0020_AH9V1RADXX/Project_RM8391_RM8392/Sample_2F2/2F2_GCCAAT_L002_R1_004.fastq.gz	Illumina WGS	HG002	Benchmark PSVGT on short reads
HG002	ftp://ftp-trace.ncbi.nlm.nih.gov/ReferenceSamples/giab/data/AshkenazimTrio/HG002_NA24385_son/NIST_HiSeq_HG002_Homogeneity-10953946/HG002_HiSeq300x_fastq/140605_D00360_0020_AH9V1RADXX/Project_RM8391_RM8392/Sample_2F2/2F2_GCCAAT_L002_R1_005.fastq.gz	Illumina WGS	HG002	Benchmark PSVGT on short reads
HG002	ftp://ftp-trace.ncbi.nlm.nih.gov/ReferenceSamples/giab/data/AshkenazimTrio/HG002_NA24385_son/NIST_HiSeq_HG002_Homogeneity-10953946/HG002_HiSeq300x_fastq/140605_D00360_0020_AH9V1RADXX/Project_RM8391_RM8392/Sample_2F2/2F2_GCCAAT_L002_R1_006.fastq.gz	Illumina WGS	HG002	Benchmark PSVGT on short reads
HG002	ftp://ftp-trace.ncbi.nlm.nih.gov/ReferenceSamples/giab/data/AshkenazimTrio/HG002_NA24385_son/NIST_HiSeq_HG002_Homogeneity-10953946/HG002_HiSeq300x_fastq/140605_D00360_0020_AH9V1RADXX/Project_RM8391_RM8392/Sample_2L1/2L1_CTTGTA_L001_R1_001.fastq.gz	Illumina WGS	HG002	Benchmark PSVGT on short reads
HG002	ftp://ftp-trace.ncbi.nlm.nih.gov/ReferenceSamples/giab/data/AshkenazimTrio/HG002_NA24385_son/NIST_HiSeq_HG002_Homogeneity-10953946/HG002_HiSeq300x_fastq/140605_D00360_0020_AH9V1RADXX/Project_RM8391_RM8392/Sample_2L1/2L1_CTTGTA_L001_R1_002.fastq.gz	Illumina WGS	HG002	Benchmark PSVGT on short reads
HG002	ftp://ftp-trace.ncbi.nlm.nih.gov/ReferenceSamples/giab/data/AshkenazimTrio/HG002_NA24385_son/NIST_HiSeq_HG002_Homogeneity-10953946/HG002_HiSeq300x_fastq/140605_D00360_0020_AH9V1RADXX/Project_RM8391_RM8392/Sample_2L1/2L1_CTTGTA_L001_R1_003.fastq.gz	Illumina WGS	HG002	Benchmark PSVGT on short reads
HG002	ftp://ftp-trace.ncbi.nlm.nih.gov/ReferenceSamples/giab/data/AshkenazimTrio/HG002_NA24385_son/NIST_HiSeq_HG002_Homogeneity-10953946/HG002_HiSeq300x_fastq/140605_D00360_0020_AH9V1RADXX/Project_RM8391_RM8392/Sample_2L1/2L1_CTTGTA_L001_R1_004.fastq.gz	Illumina WGS	HG002	Benchmark PSVGT on short reads
HG002	ftp://ftp-trace.ncbi.nlm.nih.gov/ReferenceSamples/giab/data/AshkenazimTrio/HG002_NA24385_son/NIST_HiSeq_HG002_Homogeneity-10953946/HG002_HiSeq300x_fastq/140605_D00360_0020_AH9V1RADXX/Project_RM8391_RM8392/Sample_2L1/2L1_CTTGTA_L001_R1_005.fastq.gz	Illumina WGS	HG002	Benchmark PSVGT on short reads
HG002	ftp://ftp-trace.ncbi.nlm.nih.gov/ReferenceSamples/giab/data/AshkenazimTrio/HG002_NA24385_son/NIST_HiSeq_HG002_Homogeneity-10953946/HG002_HiSeq300x_fastq/140605_D00360_0020_AH9V1RADXX/Project_RM8391_RM8392/Sample_2L1/2L1_CTTGTA_L001_R1_006.fastq.gz	Illumina WGS	HG002	Benchmark PSVGT on short reads
HG002	ftp://ftp-trace.ncbi.nlm.nih.gov/ReferenceSamples/giab/data/AshkenazimTrio/HG002_NA24385_son/NIST_HiSeq_HG002_Homogeneity-10953946/HG002_HiSeq300x_fastq/140605_D00360_0020_AH9V1RADXX/Project_RM8391_RM8392/Sample_2L1/2L1_CTTGTA_L002_R1_001.fastq.gz	Illumina WGS	HG002	Benchmark PSVGT on short reads
HG002	ftp://ftp-trace.ncbi.nlm.nih.gov/ReferenceSamples/giab/data/AshkenazimTrio/HG002_NA24385_son/NIST_HiSeq_HG002_Homogeneity-10953946/HG002_HiSeq300x_fastq/140605_D00360_0020_AH9V1RADXX/Project_RM8391_RM8392/Sample_2L1/2L1_CTTGTA_L002_R1_002.fastq.gz	Illumina WGS	HG002	Benchmark PSVGT on short reads
HG002	ftp://ftp-trace.ncbi.nlm.nih.gov/ReferenceSamples/giab/data/AshkenazimTrio/HG002_NA24385_son/NIST_HiSeq_HG002_Homogeneity-10953946/HG002_HiSeq300x_fastq/140605_D00360_0020_AH9V1RADXX/Project_RM8391_RM8392/Sample_2L1/2L1_CTTGTA_L002_R1_003.fastq.gz	Illumina WGS	HG002	Benchmark PSVGT on short reads
HG002	ftp://ftp-trace.ncbi.nlm.nih.gov/ReferenceSamples/giab/data/AshkenazimTrio/HG002_NA24385_son/NIST_HiSeq_HG002_Homogeneity-10953946/HG002_HiSeq300x_fastq/140605_D00360_0020_AH9V1RADXX/Project_RM8391_RM8392/Sample_2L1/2L1_CTTGTA_L002_R1_004.fastq.gz	Illumina WGS	HG002	Benchmark PSVGT on short reads
HG002	ftp://ftp-trace.ncbi.nlm.nih.gov/ReferenceSamples/giab/data/AshkenazimTrio/HG002_NA24385_son/NIST_HiSeq_HG002_Homogeneity-10953946/HG002_HiSeq300x_fastq/140605_D00360_0020_AH9V1RADXX/Project_RM8391_RM8392/Sample_2L1/2L1_CTTGTA_L002_R1_005.fastq.gz	Illumina WGS	HG002	Benchmark PSVGT on short reads
HG002	ftp://ftp-trace.ncbi.nlm.nih.gov/ReferenceSamples/giab/data/AshkenazimTrio/HG002_NA24385_son/NIST_HiSeq_HG002_Homogeneity-10953946/HG002_HiSeq300x_fastq/140605_D00360_0020_AH9V1RADXX/Project_RM8391_RM8392/Sample_2L1/2L1_CTTGTA_L002_R1_006.fastq.gz	Illumina WGS	HG002	Benchmark PSVGT on short reads
HG002	ftp://ftp-trace.ncbi.nlm.nih.gov/ReferenceSamples/giab/data/AshkenazimTrio/HG002_NA24385_son/NIST_HiSeq_HG002_Homogeneity-10953946/HG002_HiSeq300x_fastq/140605_D00360_0020_AH9V1RADXX/Project_RM8391_RM8392/Sample_2L2/2L2_GTGAAA_L001_R1_001.fastq.gz	Illumina WGS	HG002	Benchmark PSVGT on short reads
HG002	ftp://ftp-trace.ncbi.nlm.nih.gov/ReferenceSamples/giab/data/AshkenazimTrio/HG002_NA24385_son/NIST_HiSeq_HG002_Homogeneity-10953946/HG002_HiSeq300x_fastq/140605_D00360_0020_AH9V1RADXX/Project_RM8391_RM8392/Sample_2L2/2L2_GTGAAA_L001_R1_002.fastq.gz	Illumina WGS	HG002	Benchmark PSVGT on short reads
HG002	ftp://ftp-trace.ncbi.nlm.nih.gov/ReferenceSamples/giab/data/AshkenazimTrio/HG002_NA24385_son/NIST_HiSeq_HG002_Homogeneity-10953946/HG002_HiSeq300x_fastq/140605_D00360_0020_AH9V1RADXX/Project_RM8391_RM8392/Sample_2L2/2L2_GTGAAA_L001_R1_003.fastq.gz	Illumina WGS	HG002	Benchmark PSVGT on short reads
HG002	ftp://ftp-trace.ncbi.nlm.nih.gov/ReferenceSamples/giab/data/AshkenazimTrio/HG002_NA24385_son/NIST_HiSeq_HG002_Homogeneity-10953946/HG002_HiSeq300x_fastq/140605_D00360_0020_AH9V1RADXX/Project_RM8391_RM8392/Sample_2L2/2L2_GTGAAA_L001_R1_004.fastq.gz	Illumina WGS	HG002	Benchmark PSVGT on short reads
HG002	ftp://ftp-trace.ncbi.nlm.nih.gov/ReferenceSamples/giab/data/AshkenazimTrio/HG002_NA24385_son/NIST_HiSeq_HG002_Homogeneity-10953946/HG002_HiSeq300x_fastq/140605_D00360_0020_AH9V1RADXX/Project_RM8391_RM8392/Sample_2L2/2L2_GTGAAA_L001_R1_005.fastq.gz	Illumina WGS	HG002	Benchmark PSVGT on short reads
HG002	ftp://ftp-trace.ncbi.nlm.nih.gov/ReferenceSamples/giab/data/AshkenazimTrio/HG002_NA24385_son/NIST_HiSeq_HG002_Homogeneity-10953946/HG002_HiSeq300x_fastq/140605_D00360_0020_AH9V1RADXX/Project_RM8391_RM8392/Sample_2L2/2L2_GTGAAA_L001_R1_006.fastq.gz	Illumina WGS	HG002	Benchmark PSVGT on short reads
HG002	ftp://ftp-trace.ncbi.nlm.nih.gov/ReferenceSamples/giab/data/AshkenazimTrio/HG002_NA24385_son/NIST_HiSeq_HG002_Homogeneity-10953946/HG002_HiSeq300x_fastq/140605_D00360_0020_AH9V1RADXX/Project_RM8391_RM8392/Sample_2L2/2L2_GTGAAA_L002_R1_001.fastq.gz	Illumina WGS	HG002	Benchmark PSVGT on short reads
HG002	ftp://ftp-trace.ncbi.nlm.nih.gov/ReferenceSamples/giab/data/AshkenazimTrio/HG002_NA24385_son/NIST_HiSeq_HG002_Homogeneity-10953946/HG002_HiSeq300x_fastq/140605_D00360_0020_AH9V1RADXX/Project_RM8391_RM8392/Sample_2L2/2L2_GTGAAA_L002_R1_002.fastq.gz	Illumina WGS	HG002	Benchmark PSVGT on short reads
HG002	ftp://ftp-trace.ncbi.nlm.nih.gov/ReferenceSamples/giab/data/AshkenazimTrio/HG002_NA24385_son/NIST_HiSeq_HG002_Homogeneity-10953946/HG002_HiSeq300x_fastq/140605_D00360_0020_AH9V1RADXX/Project_RM8391_RM8392/Sample_2L2/2L2_GTGAAA_L002_R1_003.fastq.gz	Illumina WGS	HG002	Benchmark PSVGT on short reads
HG002	ftp://ftp-trace.ncbi.nlm.nih.gov/ReferenceSamples/giab/data/AshkenazimTrio/HG002_NA24385_son/NIST_HiSeq_HG002_Homogeneity-10953946/HG002_HiSeq300x_fastq/140605_D00360_0020_AH9V1RADXX/Project_RM8391_RM8392/Sample_2L2/2L2_GTGAAA_L002_R1_004.fastq.gz	Illumina WGS	HG002	Benchmark PSVGT on short reads
HG002	ftp://ftp-trace.ncbi.nlm.nih.gov/ReferenceSamples/giab/data/AshkenazimTrio/HG002_NA24385_son/NIST_HiSeq_HG002_Homogeneity-10953946/HG002_HiSeq300x_fastq/140605_D00360_0020_AH9V1RADXX/Project_RM8391_RM8392/Sample_2L2/2L2_GTGAAA_L002_R1_005.fastq.gz	Illumina WGS	HG002	Benchmark PSVGT on short reads
HG002	ftp://ftp-trace.ncbi.nlm.nih.gov/ReferenceSamples/giab/data/AshkenazimTrio/HG002_NA24385_son/NIST_HiSeq_HG002_Homogeneity-10953946/HG002_HiSeq300x_fastq/140605_D00360_0020_AH9V1RADXX/Project_RM8391_RM8392/Sample_2L2/2L2_GTGAAA_L002_R1_006.fastq.gz	Illumina WGS	HG002	Benchmark PSVGT on short reads
HG002	ftp://ftp-trace.ncbi.nlm.nih.gov/ReferenceSamples/giab/data/AshkenazimTrio/HG002_NA24385_son/NIST_HiSeq_HG002_Homogeneity-10953946/HG002_HiSeq300x_fastq/140605_D00360_0021_BH9V1VADXX/Project_RM8391_RM8392/Sample_2A1/2A1_CGATGT_L001_R1_001.fastq.gz	Illumina WGS	HG002	Benchmark PSVGT on short reads
HG002	ftp://ftp-trace.ncbi.nlm.nih.gov/ReferenceSamples/giab/data/AshkenazimTrio/HG002_NA24385_son/NIST_HiSeq_HG002_Homogeneity-10953946/HG002_HiSeq300x_fastq/140605_D00360_0021_BH9V1VADXX/Project_RM8391_RM8392/Sample_2A1/2A1_CGATGT_L001_R1_002.fastq.gz	Illumina WGS	HG002	Benchmark PSVGT on short reads
HG002	ftp://ftp-trace.ncbi.nlm.nih.gov/ReferenceSamples/giab/data/AshkenazimTrio/HG002_NA24385_son/NIST_HiSeq_HG002_Homogeneity-10953946/HG002_HiSeq300x_fastq/140605_D00360_0021_BH9V1VADXX/Project_RM8391_RM8392/Sample_2A1/2A1_CGATGT_L002_R1_001.fastq.gz	Illumina WGS	HG002	Benchmark PSVGT on short reads
HG002	ftp://ftp-trace.ncbi.nlm.nih.gov/ReferenceSamples/giab/data/AshkenazimTrio/HG002_NA24385_son/NIST_HiSeq_HG002_Homogeneity-10953946/HG002_HiSeq300x_fastq/140605_D00360_0021_BH9V1VADXX/Project_RM8391_RM8392/Sample_2A1/2A1_CGATGT_L002_R1_002.fastq.gz	Illumina WGS	HG002	Benchmark PSVGT on short reads
HG002	ftp://ftp-trace.ncbi.nlm.nih.gov/ReferenceSamples/giab/data/AshkenazimTrio/HG002_NA24385_son/NIST_HiSeq_HG002_Homogeneity-10953946/HG002_HiSeq300x_fastq/140605_D00360_0021_BH9V1VADXX/Project_RM8391_RM8392/Sample_2A2/2A2_TGACCA_L001_R1_001.fastq.gz	Illumina WGS	HG002	Benchmark PSVGT on short reads
HG002	ftp://ftp-trace.ncbi.nlm.nih.gov/ReferenceSamples/giab/data/AshkenazimTrio/HG002_NA24385_son/NIST_HiSeq_HG002_Homogeneity-10953946/HG002_HiSeq300x_fastq/140605_D00360_0021_BH9V1VADXX/Project_RM8391_RM8392/Sample_2A2/2A2_TGACCA_L001_R1_002.fastq.gz	Illumina WGS	HG002	Benchmark PSVGT on short reads
HG002	ftp://ftp-trace.ncbi.nlm.nih.gov/ReferenceSamples/giab/data/AshkenazimTrio/HG002_NA24385_son/NIST_HiSeq_HG002_Homogeneity-10953946/HG002_HiSeq300x_fastq/140605_D00360_0021_BH9V1VADXX/Project_RM8391_RM8392/Sample_2A2/2A2_TGACCA_L002_R1_001.fastq.gz	Illumina WGS	HG002	Benchmark PSVGT on short reads
HG002	ftp://ftp-trace.ncbi.nlm.nih.gov/ReferenceSamples/giab/data/AshkenazimTrio/HG002_NA24385_son/NIST_HiSeq_HG002_Homogeneity-10953946/HG002_HiSeq300x_fastq/140605_D00360_0021_BH9V1VADXX/Project_RM8391_RM8392/Sample_2A2/2A2_TGACCA_L002_R1_002.fastq.gz	Illumina WGS	HG002	Benchmark PSVGT on short reads
HG002	ftp://ftp-trace.ncbi.nlm.nih.gov/ReferenceSamples/giab/data/AshkenazimTrio/HG002_NA24385_son/NIST_HiSeq_HG002_Homogeneity-10953946/HG002_HiSeq300x_fastq/140605_D00360_0021_BH9V1VADXX/Project_RM8391_RM8392/Sample_2B1/2B1_CAGATC_L001_R1_001.fastq.gz	Illumina WGS	HG002	Benchmark PSVGT on short reads
HG002	ftp://ftp-trace.ncbi.nlm.nih.gov/ReferenceSamples/giab/data/AshkenazimTrio/HG002_NA24385_son/NIST_HiSeq_HG002_Homogeneity-10953946/HG002_HiSeq300x_fastq/140605_D00360_0021_BH9V1VADXX/Project_RM8391_RM8392/Sample_2B1/2B1_CAGATC_L001_R1_002.fastq.gz	Illumina WGS	HG002	Benchmark PSVGT on short reads
HG002	ftp://ftp-trace.ncbi.nlm.nih.gov/ReferenceSamples/giab/data/AshkenazimTrio/HG002_NA24385_son/NIST_HiSeq_HG002_Homogeneity-10953946/HG002_HiSeq300x_fastq/140605_D00360_0021_BH9V1VADXX/Project_RM8391_RM8392/Sample_2B1/2B1_CAGATC_L002_R1_001.fastq.gz	Illumina WGS	HG002	Benchmark PSVGT on short reads
HG002	ftp://ftp-trace.ncbi.nlm.nih.gov/ReferenceSamples/giab/data/AshkenazimTrio/HG002_NA24385_son/NIST_HiSeq_HG002_Homogeneity-10953946/HG002_HiSeq300x_fastq/140605_D00360_0021_BH9V1VADXX/Project_RM8391_RM8392/Sample_2B1/2B1_CAGATC_L002_R1_002.fastq.gz	Illumina WGS	HG002	Benchmark PSVGT on short reads
HG002	ftp://ftp-trace.ncbi.nlm.nih.gov/ReferenceSamples/giab/data/AshkenazimTrio/HG002_NA24385_son/NIST_HiSeq_HG002_Homogeneity-10953946/HG002_HiSeq300x_fastq/140605_D00360_0021_BH9V1VADXX/Project_RM8391_RM8392/Sample_2B2/2B2_CCGTCC_L001_R1_001.fastq.gz	Illumina WGS	HG002	Benchmark PSVGT on short reads
HG002	ftp://ftp-trace.ncbi.nlm.nih.gov/ReferenceSamples/giab/data/AshkenazimTrio/HG002_NA24385_son/NIST_HiSeq_HG002_Homogeneity-10953946/HG002_HiSeq300x_fastq/140605_D00360_0021_BH9V1VADXX/Project_RM8391_RM8392/Sample_2B2/2B2_CCGTCC_L001_R1_002.fastq.gz	Illumina WGS	HG002	Benchmark PSVGT on short reads
HG002	ftp://ftp-trace.ncbi.nlm.nih.gov/ReferenceSamples/giab/data/AshkenazimTrio/HG002_NA24385_son/NIST_HiSeq_HG002_Homogeneity-10953946/HG002_HiSeq300x_fastq/140605_D00360_0021_BH9V1VADXX/Project_RM8391_RM8392/Sample_2B2/2B2_CCGTCC_L002_R1_001.fastq.gz	Illumina WGS	HG002	Benchmark PSVGT on short reads
HG002	ftp://ftp-trace.ncbi.nlm.nih.gov/ReferenceSamples/giab/data/AshkenazimTrio/HG002_NA24385_son/NIST_HiSeq_HG002_Homogeneity-10953946/HG002_HiSeq300x_fastq/140605_D00360_0021_BH9V1VADXX/Project_RM8391_RM8392/Sample_2B2/2B2_CCGTCC_L002_R1_002.fastq.gz	Illumina WGS	HG002	Benchmark PSVGT on short reads
HG002	ftp://ftp-trace.ncbi.nlm.nih.gov/ReferenceSamples/giab/data/AshkenazimTrio/HG002_NA24385_son/NIST_HiSeq_HG002_Homogeneity-10953946/HG002_HiSeq300x_fastq/140605_D00360_0021_BH9V1VADXX/Project_RM8391_RM8392/Sample_2C1/2C1_AGTCAA_L001_R1_001.fastq.gz	Illumina WGS	HG002	Benchmark PSVGT on short reads
HG002	ftp://ftp-trace.ncbi.nlm.nih.gov/ReferenceSamples/giab/data/AshkenazimTrio/HG002_NA24385_son/NIST_HiSeq_HG002_Homogeneity-10953946/HG002_HiSeq300x_fastq/140605_D00360_0021_BH9V1VADXX/Project_RM8391_RM8392/Sample_2C1/2C1_AGTCAA_L001_R1_002.fastq.gz	Illumina WGS	HG002	Benchmark PSVGT on short reads
HG002	ftp://ftp-trace.ncbi.nlm.nih.gov/ReferenceSamples/giab/data/AshkenazimTrio/HG002_NA24385_son/NIST_HiSeq_HG002_Homogeneity-10953946/HG002_HiSeq300x_fastq/140605_D00360_0021_BH9V1VADXX/Project_RM8391_RM8392/Sample_2C1/2C1_AGTCAA_L002_R1_001.fastq.gz	Illumina WGS	HG002	Benchmark PSVGT on short reads
HG002	ftp://ftp-trace.ncbi.nlm.nih.gov/ReferenceSamples/giab/data/AshkenazimTrio/HG002_NA24385_son/NIST_HiSeq_HG002_Homogeneity-10953946/HG002_HiSeq300x_fastq/140605_D00360_0021_BH9V1VADXX/Project_RM8391_RM8392/Sample_2C1/2C1_AGTCAA_L002_R1_002.fastq.gz	Illumina WGS	HG002	Benchmark PSVGT on short reads
HG002	ftp://ftp-trace.ncbi.nlm.nih.gov/ReferenceSamples/giab/data/AshkenazimTrio/HG002_NA24385_son/NIST_HiSeq_HG002_Homogeneity-10953946/HG002_HiSeq300x_fastq/140605_D00360_0021_BH9V1VADXX/Project_RM8391_RM8392/Sample_2C2/2C2_AGTTCC_L001_R1_001.fastq.gz	Illumina WGS	HG002	Benchmark PSVGT on short reads
HG002	ftp://ftp-trace.ncbi.nlm.nih.gov/ReferenceSamples/giab/data/AshkenazimTrio/HG002_NA24385_son/NIST_HiSeq_HG002_Homogeneity-10953946/HG002_HiSeq300x_fastq/140605_D00360_0021_BH9V1VADXX/Project_RM8391_RM8392/Sample_2C2/2C2_AGTTCC_L001_R1_002.fastq.gz	Illumina WGS	HG002	Benchmark PSVGT on short reads
HG002	ftp://ftp-trace.ncbi.nlm.nih.gov/ReferenceSamples/giab/data/AshkenazimTrio/HG002_NA24385_son/NIST_HiSeq_HG002_Homogeneity-10953946/HG002_HiSeq300x_fastq/140605_D00360_0021_BH9V1VADXX/Project_RM8391_RM8392/Sample_2C2/2C2_AGTTCC_L002_R1_001.fastq.gz	Illumina WGS	HG002	Benchmark PSVGT on short reads
HG002	ftp://ftp-trace.ncbi.nlm.nih.gov/ReferenceSamples/giab/data/AshkenazimTrio/HG002_NA24385_son/NIST_HiSeq_HG002_Homogeneity-10953946/HG002_HiSeq300x_fastq/140605_D00360_0021_BH9V1VADXX/Project_RM8391_RM8392/Sample_2C2/2C2_AGTTCC_L002_R1_002.fastq.gz	Illumina WGS	HG002	Benchmark PSVGT on short reads
HG002	ftp://ftp-trace.ncbi.nlm.nih.gov/ReferenceSamples/giab/data/AshkenazimTrio/HG002_NA24385_son/NIST_HiSeq_HG002_Homogeneity-10953946/HG002_HiSeq300x_fastq/140605_D00360_0021_BH9V1VADXX/Project_RM8391_RM8392/Sample_2D1/2D1_ATGTCA_L001_R1_001.fastq.gz	Illumina WGS	HG002	Benchmark PSVGT on short reads
HG002	ftp://ftp-trace.ncbi.nlm.nih.gov/ReferenceSamples/giab/data/AshkenazimTrio/HG002_NA24385_son/NIST_HiSeq_HG002_Homogeneity-10953946/HG002_HiSeq300x_fastq/140605_D00360_0021_BH9V1VADXX/Project_RM8391_RM8392/Sample_2D1/2D1_ATGTCA_L001_R1_002.fastq.gz	Illumina WGS	HG002	Benchmark PSVGT on short reads
HG002	ftp://ftp-trace.ncbi.nlm.nih.gov/ReferenceSamples/giab/data/AshkenazimTrio/HG002_NA24385_son/NIST_HiSeq_HG002_Homogeneity-10953946/HG002_HiSeq300x_fastq/140605_D00360_0021_BH9V1VADXX/Project_RM8391_RM8392/Sample_2D1/2D1_ATGTCA_L002_R1_001.fastq.gz	Illumina WGS	HG002	Benchmark PSVGT on short reads
HG002	ftp://ftp-trace.ncbi.nlm.nih.gov/ReferenceSamples/giab/data/AshkenazimTrio/HG002_NA24385_son/NIST_HiSeq_HG002_Homogeneity-10953946/HG002_HiSeq300x_fastq/140605_D00360_0021_BH9V1VADXX/Project_RM8391_RM8392/Sample_2D1/2D1_ATGTCA_L002_R1_002.fastq.gz	Illumina WGS	HG002	Benchmark PSVGT on short reads
HG002	ftp://ftp-trace.ncbi.nlm.nih.gov/ReferenceSamples/giab/data/AshkenazimTrio/HG002_NA24385_son/NIST_HiSeq_HG002_Homogeneity-10953946/HG002_HiSeq300x_fastq/140605_D00360_0021_BH9V1VADXX/Project_RM8391_RM8392/Sample_2D2/2D2_GTCCGC_L001_R1_001.fastq.gz	Illumina WGS	HG002	Benchmark PSVGT on short reads
HG002	ftp://ftp-trace.ncbi.nlm.nih.gov/ReferenceSamples/giab/data/AshkenazimTrio/HG002_NA24385_son/NIST_HiSeq_HG002_Homogeneity-10953946/HG002_HiSeq300x_fastq/140605_D00360_0021_BH9V1VADXX/Project_RM8391_RM8392/Sample_2D2/2D2_GTCCGC_L001_R1_002.fastq.gz	Illumina WGS	HG002	Benchmark PSVGT on short reads
HG002	ftp://ftp-trace.ncbi.nlm.nih.gov/ReferenceSamples/giab/data/AshkenazimTrio/HG002_NA24385_son/NIST_HiSeq_HG002_Homogeneity-10953946/HG002_HiSeq300x_fastq/140605_D00360_0021_BH9V1VADXX/Project_RM8391_RM8392/Sample_2D2/2D2_GTCCGC_L002_R1_001.fastq.gz	Illumina WGS	HG002	Benchmark PSVGT on short reads
HG002	ftp://ftp-trace.ncbi.nlm.nih.gov/ReferenceSamples/giab/data/AshkenazimTrio/HG002_NA24385_son/NIST_HiSeq_HG002_Homogeneity-10953946/HG002_HiSeq300x_fastq/140605_D00360_0021_BH9V1VADXX/Project_RM8391_RM8392/Sample_2D2/2D2_GTCCGC_L002_R1_002.fastq.gz	Illumina WGS	HG002	Benchmark PSVGT on short reads
HG002	ftp://ftp-trace.ncbi.nlm.nih.gov/ReferenceSamples/giab/data/AshkenazimTrio/HG002_NA24385_son/NIST_HiSeq_HG002_Homogeneity-10953946/HG002_HiSeq300x_fastq/140605_D00360_0021_BH9V1VADXX/Project_RM8391_RM8392/Sample_2F1/2F1_ACAGTG_L001_R1_001.fastq.gz	Illumina WGS	HG002	Benchmark PSVGT on short reads
HG002	ftp://ftp-trace.ncbi.nlm.nih.gov/ReferenceSamples/giab/data/AshkenazimTrio/HG002_NA24385_son/NIST_HiSeq_HG002_Homogeneity-10953946/HG002_HiSeq300x_fastq/140605_D00360_0021_BH9V1VADXX/Project_RM8391_RM8392/Sample_2F1/2F1_ACAGTG_L001_R1_002.fastq.gz	Illumina WGS	HG002	Benchmark PSVGT on short reads
HG002	ftp://ftp-trace.ncbi.nlm.nih.gov/ReferenceSamples/giab/data/AshkenazimTrio/HG002_NA24385_son/NIST_HiSeq_HG002_Homogeneity-10953946/HG002_HiSeq300x_fastq/140605_D00360_0021_BH9V1VADXX/Project_RM8391_RM8392/Sample_2F1/2F1_ACAGTG_L001_R1_003.fastq.gz	Illumina WGS	HG002	Benchmark PSVGT on short reads
HG002	ftp://ftp-trace.ncbi.nlm.nih.gov/ReferenceSamples/giab/data/AshkenazimTrio/HG002_NA24385_son/NIST_HiSeq_HG002_Homogeneity-10953946/HG002_HiSeq300x_fastq/140605_D00360_0021_BH9V1VADXX/Project_RM8391_RM8392/Sample_2F1/2F1_ACAGTG_L001_R1_004.fastq.gz	Illumina WGS	HG002	Benchmark PSVGT on short reads
HG002	ftp://ftp-trace.ncbi.nlm.nih.gov/ReferenceSamples/giab/data/AshkenazimTrio/HG002_NA24385_son/NIST_HiSeq_HG002_Homogeneity-10953946/HG002_HiSeq300x_fastq/140605_D00360_0021_BH9V1VADXX/Project_RM8391_RM8392/Sample_2F1/2F1_ACAGTG_L001_R1_005.fastq.gz	Illumina WGS	HG002	Benchmark PSVGT on short reads
HG002	ftp://ftp-trace.ncbi.nlm.nih.gov/ReferenceSamples/giab/data/AshkenazimTrio/HG002_NA24385_son/NIST_HiSeq_HG002_Homogeneity-10953946/HG002_HiSeq300x_fastq/140605_D00360_0021_BH9V1VADXX/Project_RM8391_RM8392/Sample_2F1/2F1_ACAGTG_L001_R1_006.fastq.gz	Illumina WGS	HG002	Benchmark PSVGT on short reads
HG002	ftp://ftp-trace.ncbi.nlm.nih.gov/ReferenceSamples/giab/data/AshkenazimTrio/HG002_NA24385_son/NIST_HiSeq_HG002_Homogeneity-10953946/HG002_HiSeq300x_fastq/140605_D00360_0021_BH9V1VADXX/Project_RM8391_RM8392/Sample_2F1/2F1_ACAGTG_L002_R1_001.fastq.gz	Illumina WGS	HG002	Benchmark PSVGT on short reads
HG002	ftp://ftp-trace.ncbi.nlm.nih.gov/ReferenceSamples/giab/data/AshkenazimTrio/HG002_NA24385_son/NIST_HiSeq_HG002_Homogeneity-10953946/HG002_HiSeq300x_fastq/140605_D00360_0021_BH9V1VADXX/Project_RM8391_RM8392/Sample_2F1/2F1_ACAGTG_L002_R1_002.fastq.gz	Illumina WGS	HG002	Benchmark PSVGT on short reads
HG002	ftp://ftp-trace.ncbi.nlm.nih.gov/ReferenceSamples/giab/data/AshkenazimTrio/HG002_NA24385_son/NIST_HiSeq_HG002_Homogeneity-10953946/HG002_HiSeq300x_fastq/140605_D00360_0021_BH9V1VADXX/Project_RM8391_RM8392/Sample_2F1/2F1_ACAGTG_L002_R1_003.fastq.gz	Illumina WGS	HG002	Benchmark PSVGT on short reads
HG002	ftp://ftp-trace.ncbi.nlm.nih.gov/ReferenceSamples/giab/data/AshkenazimTrio/HG002_NA24385_son/NIST_HiSeq_HG002_Homogeneity-10953946/HG002_HiSeq300x_fastq/140605_D00360_0021_BH9V1VADXX/Project_RM8391_RM8392/Sample_2F1/2F1_ACAGTG_L002_R1_004.fastq.gz	Illumina WGS	HG002	Benchmark PSVGT on short reads
HG002	ftp://ftp-trace.ncbi.nlm.nih.gov/ReferenceSamples/giab/data/AshkenazimTrio/HG002_NA24385_son/NIST_HiSeq_HG002_Homogeneity-10953946/HG002_HiSeq300x_fastq/140605_D00360_0021_BH9V1VADXX/Project_RM8391_RM8392/Sample_2F1/2F1_ACAGTG_L002_R1_005.fastq.gz	Illumina WGS	HG002	Benchmark PSVGT on short reads
HG002	ftp://ftp-trace.ncbi.nlm.nih.gov/ReferenceSamples/giab/data/AshkenazimTrio/HG002_NA24385_son/NIST_HiSeq_HG002_Homogeneity-10953946/HG002_HiSeq300x_fastq/140605_D00360_0021_BH9V1VADXX/Project_RM8391_RM8392/Sample_2F1/2F1_ACAGTG_L002_R1_006.fastq.gz	Illumina WGS	HG002	Benchmark PSVGT on short reads
HG002	ftp://ftp-trace.ncbi.nlm.nih.gov/ReferenceSamples/giab/data/AshkenazimTrio/HG002_NA24385_son/NIST_HiSeq_HG002_Homogeneity-10953946/HG002_HiSeq300x_fastq/140605_D00360_0021_BH9V1VADXX/Project_RM8391_RM8392/Sample_2F2/2F2_GCCAAT_L001_R1_001.fastq.gz	Illumina WGS	HG002	Benchmark PSVGT on short reads
HG002	ftp://ftp-trace.ncbi.nlm.nih.gov/ReferenceSamples/giab/data/AshkenazimTrio/HG002_NA24385_son/NIST_HiSeq_HG002_Homogeneity-10953946/HG002_HiSeq300x_fastq/140605_D00360_0021_BH9V1VADXX/Project_RM8391_RM8392/Sample_2F2/2F2_GCCAAT_L001_R1_002.fastq.gz	Illumina WGS	HG002	Benchmark PSVGT on short reads
HG002	ftp://ftp-trace.ncbi.nlm.nih.gov/ReferenceSamples/giab/data/AshkenazimTrio/HG002_NA24385_son/NIST_HiSeq_HG002_Homogeneity-10953946/HG002_HiSeq300x_fastq/140605_D00360_0021_BH9V1VADXX/Project_RM8391_RM8392/Sample_2F2/2F2_GCCAAT_L001_R1_003.fastq.gz	Illumina WGS	HG002	Benchmark PSVGT on short reads
HG002	ftp://ftp-trace.ncbi.nlm.nih.gov/ReferenceSamples/giab/data/AshkenazimTrio/HG002_NA24385_son/NIST_HiSeq_HG002_Homogeneity-10953946/HG002_HiSeq300x_fastq/140605_D00360_0021_BH9V1VADXX/Project_RM8391_RM8392/Sample_2F2/2F2_GCCAAT_L001_R1_004.fastq.gz	Illumina WGS	HG002	Benchmark PSVGT on short reads
HG002	ftp://ftp-trace.ncbi.nlm.nih.gov/ReferenceSamples/giab/data/AshkenazimTrio/HG002_NA24385_son/NIST_HiSeq_HG002_Homogeneity-10953946/HG002_HiSeq300x_fastq/140605_D00360_0021_BH9V1VADXX/Project_RM8391_RM8392/Sample_2F2/2F2_GCCAAT_L001_R1_005.fastq.gz	Illumina WGS	HG002	Benchmark PSVGT on short reads
HG002	ftp://ftp-trace.ncbi.nlm.nih.gov/ReferenceSamples/giab/data/AshkenazimTrio/HG002_NA24385_son/NIST_HiSeq_HG002_Homogeneity-10953946/HG002_HiSeq300x_fastq/140605_D00360_0021_BH9V1VADXX/Project_RM8391_RM8392/Sample_2F2/2F2_GCCAAT_L001_R1_006.fastq.gz	Illumina WGS	HG002	Benchmark PSVGT on short reads
HG002	ftp://ftp-trace.ncbi.nlm.nih.gov/ReferenceSamples/giab/data/AshkenazimTrio/HG002_NA24385_son/NIST_HiSeq_HG002_Homogeneity-10953946/HG002_HiSeq300x_fastq/140605_D00360_0021_BH9V1VADXX/Project_RM8391_RM8392/Sample_2F2/2F2_GCCAAT_L002_R1_001.fastq.gz	Illumina WGS	HG002	Benchmark PSVGT on short reads
HG002	ftp://ftp-trace.ncbi.nlm.nih.gov/ReferenceSamples/giab/data/AshkenazimTrio/HG002_NA24385_son/NIST_HiSeq_HG002_Homogeneity-10953946/HG002_HiSeq300x_fastq/140605_D00360_0021_BH9V1VADXX/Project_RM8391_RM8392/Sample_2F2/2F2_GCCAAT_L002_R1_002.fastq.gz	Illumina WGS	HG002	Benchmark PSVGT on short reads
HG002	ftp://ftp-trace.ncbi.nlm.nih.gov/ReferenceSamples/giab/data/AshkenazimTrio/HG002_NA24385_son/NIST_HiSeq_HG002_Homogeneity-10953946/HG002_HiSeq300x_fastq/140605_D00360_0021_BH9V1VADXX/Project_RM8391_RM8392/Sample_2F2/2F2_GCCAAT_L002_R1_003.fastq.gz	Illumina WGS	HG002	Benchmark PSVGT on short reads
HG002	ftp://ftp-trace.ncbi.nlm.nih.gov/ReferenceSamples/giab/data/AshkenazimTrio/HG002_NA24385_son/NIST_HiSeq_HG002_Homogeneity-10953946/HG002_HiSeq300x_fastq/140605_D00360_0021_BH9V1VADXX/Project_RM8391_RM8392/Sample_2F2/2F2_GCCAAT_L002_R1_004.fastq.gz	Illumina WGS	HG002	Benchmark PSVGT on short reads
HG002	ftp://ftp-trace.ncbi.nlm.nih.gov/ReferenceSamples/giab/data/AshkenazimTrio/HG002_NA24385_son/NIST_HiSeq_HG002_Homogeneity-10953946/HG002_HiSeq300x_fastq/140605_D00360_0021_BH9V1VADXX/Project_RM8391_RM8392/Sample_2F2/2F2_GCCAAT_L002_R1_005.fastq.gz	Illumina WGS	HG002	Benchmark PSVGT on short reads
HG002	ftp://ftp-trace.ncbi.nlm.nih.gov/ReferenceSamples/giab/data/AshkenazimTrio/HG002_NA24385_son/NIST_HiSeq_HG002_Homogeneity-10953946/HG002_HiSeq300x_fastq/140605_D00360_0021_BH9V1VADXX/Project_RM8391_RM8392/Sample_2F2/2F2_GCCAAT_L002_R1_006.fastq.gz	Illumina WGS	HG002	Benchmark PSVGT on short reads
HG002	ftp://ftp-trace.ncbi.nlm.nih.gov/ReferenceSamples/giab/data/AshkenazimTrio/HG002_NA24385_son/NIST_HiSeq_HG002_Homogeneity-10953946/HG002_HiSeq300x_fastq/140605_D00360_0021_BH9V1VADXX/Project_RM8391_RM8392/Sample_2L1/2L1_CTTGTA_L001_R1_001.fastq.gz	Illumina WGS	HG002	Benchmark PSVGT on short reads
HG002	ftp://ftp-trace.ncbi.nlm.nih.gov/ReferenceSamples/giab/data/AshkenazimTrio/HG002_NA24385_son/NIST_HiSeq_HG002_Homogeneity-10953946/HG002_HiSeq300x_fastq/140605_D00360_0021_BH9V1VADXX/Project_RM8391_RM8392/Sample_2L1/2L1_CTTGTA_L001_R1_002.fastq.gz	Illumina WGS	HG002	Benchmark PSVGT on short reads
HG002	ftp://ftp-trace.ncbi.nlm.nih.gov/ReferenceSamples/giab/data/AshkenazimTrio/HG002_NA24385_son/NIST_HiSeq_HG002_Homogeneity-10953946/HG002_HiSeq300x_fastq/140605_D00360_0021_BH9V1VADXX/Project_RM8391_RM8392/Sample_2L1/2L1_CTTGTA_L001_R1_003.fastq.gz	Illumina WGS	HG002	Benchmark PSVGT on short reads
HG002	ftp://ftp-trace.ncbi.nlm.nih.gov/ReferenceSamples/giab/data/AshkenazimTrio/HG002_NA24385_son/NIST_HiSeq_HG002_Homogeneity-10953946/HG002_HiSeq300x_fastq/140605_D00360_0021_BH9V1VADXX/Project_RM8391_RM8392/Sample_2L1/2L1_CTTGTA_L001_R1_004.fastq.gz	Illumina WGS	HG002	Benchmark PSVGT on short reads
HG002	ftp://ftp-trace.ncbi.nlm.nih.gov/ReferenceSamples/giab/data/AshkenazimTrio/HG002_NA24385_son/NIST_HiSeq_HG002_Homogeneity-10953946/HG002_HiSeq300x_fastq/140605_D00360_0021_BH9V1VADXX/Project_RM8391_RM8392/Sample_2L1/2L1_CTTGTA_L001_R1_005.fastq.gz	Illumina WGS	HG002	Benchmark PSVGT on short reads
HG002	ftp://ftp-trace.ncbi.nlm.nih.gov/ReferenceSamples/giab/data/AshkenazimTrio/HG002_NA24385_son/NIST_HiSeq_HG002_Homogeneity-10953946/HG002_HiSeq300x_fastq/140605_D00360_0021_BH9V1VADXX/Project_RM8391_RM8392/Sample_2L1/2L1_CTTGTA_L001_R1_006.fastq.gz	Illumina WGS	HG002	Benchmark PSVGT on short reads
HG002	ftp://ftp-trace.ncbi.nlm.nih.gov/ReferenceSamples/giab/data/AshkenazimTrio/HG002_NA24385_son/NIST_HiSeq_HG002_Homogeneity-10953946/HG002_HiSeq300x_fastq/140605_D00360_0021_BH9V1VADXX/Project_RM8391_RM8392/Sample_2L1/2L1_CTTGTA_L002_R1_001.fastq.gz	Illumina WGS	HG002	Benchmark PSVGT on short reads
HG002	ftp://ftp-trace.ncbi.nlm.nih.gov/ReferenceSamples/giab/data/AshkenazimTrio/HG002_NA24385_son/NIST_HiSeq_HG002_Homogeneity-10953946/HG002_HiSeq300x_fastq/140605_D00360_0021_BH9V1VADXX/Project_RM8391_RM8392/Sample_2L1/2L1_CTTGTA_L002_R1_002.fastq.gz	Illumina WGS	HG002	Benchmark PSVGT on short reads
HG002	ftp://ftp-trace.ncbi.nlm.nih.gov/ReferenceSamples/giab/data/AshkenazimTrio/HG002_NA24385_son/NIST_HiSeq_HG002_Homogeneity-10953946/HG002_HiSeq300x_fastq/140605_D00360_0021_BH9V1VADXX/Project_RM8391_RM8392/Sample_2L1/2L1_CTTGTA_L002_R1_003.fastq.gz	Illumina WGS	HG002	Benchmark PSVGT on short reads
HG002	ftp://ftp-trace.ncbi.nlm.nih.gov/ReferenceSamples/giab/data/AshkenazimTrio/HG002_NA24385_son/NIST_HiSeq_HG002_Homogeneity-10953946/HG002_HiSeq300x_fastq/140605_D00360_0021_BH9V1VADXX/Project_RM8391_RM8392/Sample_2L1/2L1_CTTGTA_L002_R1_004.fastq.gz	Illumina WGS	HG002	Benchmark PSVGT on short reads
HG002	ftp://ftp-trace.ncbi.nlm.nih.gov/ReferenceSamples/giab/data/AshkenazimTrio/HG002_NA24385_son/NIST_HiSeq_HG002_Homogeneity-10953946/HG002_HiSeq300x_fastq/140605_D00360_0021_BH9V1VADXX/Project_RM8391_RM8392/Sample_2L1/2L1_CTTGTA_L002_R1_005.fastq.gz	Illumina WGS	HG002	Benchmark PSVGT on short reads
HG002	ftp://ftp-trace.ncbi.nlm.nih.gov/ReferenceSamples/giab/data/AshkenazimTrio/HG002_NA24385_son/NIST_HiSeq_HG002_Homogeneity-10953946/HG002_HiSeq300x_fastq/140605_D00360_0021_BH9V1VADXX/Project_RM8391_RM8392/Sample_2L1/2L1_CTTGTA_L002_R1_006.fastq.gz	Illumina WGS	HG002	Benchmark PSVGT on short reads
HG002	ftp://ftp-trace.ncbi.nlm.nih.gov/ReferenceSamples/giab/data/AshkenazimTrio/HG002_NA24385_son/NIST_HiSeq_HG002_Homogeneity-10953946/HG002_HiSeq300x_fastq/140605_D00360_0021_BH9V1VADXX/Project_RM8391_RM8392/Sample_2L2/2L2_GTGAAA_L001_R1_001.fastq.gz	Illumina WGS	HG002	Benchmark PSVGT on short reads
HG002	ftp://ftp-trace.ncbi.nlm.nih.gov/ReferenceSamples/giab/data/AshkenazimTrio/HG002_NA24385_son/NIST_HiSeq_HG002_Homogeneity-10953946/HG002_HiSeq300x_fastq/140605_D00360_0021_BH9V1VADXX/Project_RM8391_RM8392/Sample_2L2/2L2_GTGAAA_L001_R1_002.fastq.gz	Illumina WGS	HG002	Benchmark PSVGT on short reads
HG002	ftp://ftp-trace.ncbi.nlm.nih.gov/ReferenceSamples/giab/data/AshkenazimTrio/HG002_NA24385_son/NIST_HiSeq_HG002_Homogeneity-10953946/HG002_HiSeq300x_fastq/140605_D00360_0021_BH9V1VADXX/Project_RM8391_RM8392/Sample_2L2/2L2_GTGAAA_L001_R1_003.fastq.gz	Illumina WGS	HG002	Benchmark PSVGT on short reads
HG002	ftp://ftp-trace.ncbi.nlm.nih.gov/ReferenceSamples/giab/data/AshkenazimTrio/HG002_NA24385_son/NIST_HiSeq_HG002_Homogeneity-10953946/HG002_HiSeq300x_fastq/140605_D00360_0021_BH9V1VADXX/Project_RM8391_RM8392/Sample_2L2/2L2_GTGAAA_L001_R1_004.fastq.gz	Illumina WGS	HG002	Benchmark PSVGT on short reads
HG002	ftp://ftp-trace.ncbi.nlm.nih.gov/ReferenceSamples/giab/data/AshkenazimTrio/HG002_NA24385_son/NIST_HiSeq_HG002_Homogeneity-10953946/HG002_HiSeq300x_fastq/140605_D00360_0021_BH9V1VADXX/Project_RM8391_RM8392/Sample_2L2/2L2_GTGAAA_L001_R1_005.fastq.gz	Illumina WGS	HG002	Benchmark PSVGT on short reads
HG002	ftp://ftp-trace.ncbi.nlm.nih.gov/ReferenceSamples/giab/data/AshkenazimTrio/HG002_NA24385_son/NIST_HiSeq_HG002_Homogeneity-10953946/HG002_HiSeq300x_fastq/140605_D00360_0021_BH9V1VADXX/Project_RM8391_RM8392/Sample_2L2/2L2_GTGAAA_L001_R1_006.fastq.gz	Illumina WGS	HG002	Benchmark PSVGT on short reads
HG002	ftp://ftp-trace.ncbi.nlm.nih.gov/ReferenceSamples/giab/data/AshkenazimTrio/HG002_NA24385_son/NIST_HiSeq_HG002_Homogeneity-10953946/HG002_HiSeq300x_fastq/140605_D00360_0021_BH9V1VADXX/Project_RM8391_RM8392/Sample_2L2/2L2_GTGAAA_L002_R1_001.fastq.gz	Illumina WGS	HG002	Benchmark PSVGT on short reads
HG002	ftp://ftp-trace.ncbi.nlm.nih.gov/ReferenceSamples/giab/data/AshkenazimTrio/HG002_NA24385_son/NIST_HiSeq_HG002_Homogeneity-10953946/HG002_HiSeq300x_fastq/140605_D00360_0021_BH9V1VADXX/Project_RM8391_RM8392/Sample_2L2/2L2_GTGAAA_L002_R1_002.fastq.gz	Illumina WGS	HG002	Benchmark PSVGT on short reads
HG002	ftp://ftp-trace.ncbi.nlm.nih.gov/ReferenceSamples/giab/data/AshkenazimTrio/HG002_NA24385_son/NIST_HiSeq_HG002_Homogeneity-10953946/HG002_HiSeq300x_fastq/140605_D00360_0021_BH9V1VADXX/Project_RM8391_RM8392/Sample_2L2/2L2_GTGAAA_L002_R1_003.fastq.gz	Illumina WGS	HG002	Benchmark PSVGT on short reads
HG002	ftp://ftp-trace.ncbi.nlm.nih.gov/ReferenceSamples/giab/data/AshkenazimTrio/HG002_NA24385_son/NIST_HiSeq_HG002_Homogeneity-10953946/HG002_HiSeq300x_fastq/140605_D00360_0021_BH9V1VADXX/Project_RM8391_RM8392/Sample_2L2/2L2_GTGAAA_L002_R1_004.fastq.gz	Illumina WGS	HG002	Benchmark PSVGT on short reads
HG002	ftp://ftp-trace.ncbi.nlm.nih.gov/ReferenceSamples/giab/data/AshkenazimTrio/HG002_NA24385_son/NIST_HiSeq_HG002_Homogeneity-10953946/HG002_HiSeq300x_fastq/140605_D00360_0021_BH9V1VADXX/Project_RM8391_RM8392/Sample_2L2/2L2_GTGAAA_L002_R1_005.fastq.gz	Illumina WGS	HG002	Benchmark PSVGT on short reads
HG002	ftp://ftp-trace.ncbi.nlm.nih.gov/ReferenceSamples/giab/data/AshkenazimTrio/HG002_NA24385_son/NIST_HiSeq_HG002_Homogeneity-10953946/HG002_HiSeq300x_fastq/140605_D00360_0021_BH9V1VADXX/Project_RM8391_RM8392/Sample_2L2/2L2_GTGAAA_L002_R1_006.fastq.gz	Illumina WGS	HG002	Benchmark PSVGT on short reads
HG002	ftp://ftp-trace.ncbi.nlm.nih.gov/ReferenceSamples/giab/data/AshkenazimTrio/HG002_NA24385_son/NIST_HiSeq_HG002_Homogeneity-10953946/HG002_HiSeq300x_fastq/140609_D00360_0022_AH9UJNADXX/Project_RM8391_RM8392/Sample_2A1/2A1_CGATGT_L001_R1_001.fastq.gz	Illumina WGS	HG002	Benchmark PSVGT on short reads
HG002	ftp://ftp-trace.ncbi.nlm.nih.gov/ReferenceSamples/giab/data/AshkenazimTrio/HG002_NA24385_son/NIST_HiSeq_HG002_Homogeneity-10953946/HG002_HiSeq300x_fastq/140609_D00360_0022_AH9UJNADXX/Project_RM8391_RM8392/Sample_2A1/2A1_CGATGT_L001_R1_002.fastq.gz	Illumina WGS	HG002	Benchmark PSVGT on short reads
HG002	ftp://ftp-trace.ncbi.nlm.nih.gov/ReferenceSamples/giab/data/AshkenazimTrio/HG002_NA24385_son/NIST_HiSeq_HG002_Homogeneity-10953946/HG002_HiSeq300x_fastq/140609_D00360_0022_AH9UJNADXX/Project_RM8391_RM8392/Sample_2A1/2A1_CGATGT_L002_R1_001.fastq.gz	Illumina WGS	HG002	Benchmark PSVGT on short reads
HG002	ftp://ftp-trace.ncbi.nlm.nih.gov/ReferenceSamples/giab/data/AshkenazimTrio/HG002_NA24385_son/NIST_HiSeq_HG002_Homogeneity-10953946/HG002_HiSeq300x_fastq/140609_D00360_0022_AH9UJNADXX/Project_RM8391_RM8392/Sample_2A1/2A1_CGATGT_L002_R1_002.fastq.gz	Illumina WGS	HG002	Benchmark PSVGT on short reads
HG002	ftp://ftp-trace.ncbi.nlm.nih.gov/ReferenceSamples/giab/data/AshkenazimTrio/HG002_NA24385_son/NIST_HiSeq_HG002_Homogeneity-10953946/HG002_HiSeq300x_fastq/140609_D00360_0022_AH9UJNADXX/Project_RM8391_RM8392/Sample_2A2/2A2_TGACCA_L001_R1_001.fastq.gz	Illumina WGS	HG002	Benchmark PSVGT on short reads
HG002	ftp://ftp-trace.ncbi.nlm.nih.gov/ReferenceSamples/giab/data/AshkenazimTrio/HG002_NA24385_son/NIST_HiSeq_HG002_Homogeneity-10953946/HG002_HiSeq300x_fastq/140609_D00360_0022_AH9UJNADXX/Project_RM8391_RM8392/Sample_2A2/2A2_TGACCA_L001_R1_002.fastq.gz	Illumina WGS	HG002	Benchmark PSVGT on short reads
HG002	ftp://ftp-trace.ncbi.nlm.nih.gov/ReferenceSamples/giab/data/AshkenazimTrio/HG002_NA24385_son/NIST_HiSeq_HG002_Homogeneity-10953946/HG002_HiSeq300x_fastq/140609_D00360_0022_AH9UJNADXX/Project_RM8391_RM8392/Sample_2A2/2A2_TGACCA_L002_R1_001.fastq.gz	Illumina WGS	HG002	Benchmark PSVGT on short reads
HG002	ftp://ftp-trace.ncbi.nlm.nih.gov/ReferenceSamples/giab/data/AshkenazimTrio/HG002_NA24385_son/NIST_HiSeq_HG002_Homogeneity-10953946/HG002_HiSeq300x_fastq/140609_D00360_0022_AH9UJNADXX/Project_RM8391_RM8392/Sample_2A2/2A2_TGACCA_L002_R1_002.fastq.gz	Illumina WGS	HG002	Benchmark PSVGT on short reads
HG002	ftp://ftp-trace.ncbi.nlm.nih.gov/ReferenceSamples/giab/data/AshkenazimTrio/HG002_NA24385_son/NIST_HiSeq_HG002_Homogeneity-10953946/HG002_HiSeq300x_fastq/140609_D00360_0022_AH9UJNADXX/Project_RM8391_RM8392/Sample_2B1/2B1_CAGATC_L001_R1_001.fastq.gz	Illumina WGS	HG002	Benchmark PSVGT on short reads
HG002	ftp://ftp-trace.ncbi.nlm.nih.gov/ReferenceSamples/giab/data/AshkenazimTrio/HG002_NA24385_son/NIST_HiSeq_HG002_Homogeneity-10953946/HG002_HiSeq300x_fastq/140609_D00360_0022_AH9UJNADXX/Project_RM8391_RM8392/Sample_2B1/2B1_CAGATC_L001_R1_002.fastq.gz	Illumina WGS	HG002	Benchmark PSVGT on short reads
HG002	ftp://ftp-trace.ncbi.nlm.nih.gov/ReferenceSamples/giab/data/AshkenazimTrio/HG002_NA24385_son/NIST_HiSeq_HG002_Homogeneity-10953946/HG002_HiSeq300x_fastq/140609_D00360_0022_AH9UJNADXX/Project_RM8391_RM8392/Sample_2B1/2B1_CAGATC_L002_R1_001.fastq.gz	Illumina WGS	HG002	Benchmark PSVGT on short reads
HG002	ftp://ftp-trace.ncbi.nlm.nih.gov/ReferenceSamples/giab/data/AshkenazimTrio/HG002_NA24385_son/NIST_HiSeq_HG002_Homogeneity-10953946/HG002_HiSeq300x_fastq/140609_D00360_0022_AH9UJNADXX/Project_RM8391_RM8392/Sample_2B1/2B1_CAGATC_L002_R1_002.fastq.gz	Illumina WGS	HG002	Benchmark PSVGT on short reads
HG002	ftp://ftp-trace.ncbi.nlm.nih.gov/ReferenceSamples/giab/data/AshkenazimTrio/HG002_NA24385_son/NIST_HiSeq_HG002_Homogeneity-10953946/HG002_HiSeq300x_fastq/140609_D00360_0022_AH9UJNADXX/Project_RM8391_RM8392/Sample_2B2/2B2_CCGTCC_L001_R1_001.fastq.gz	Illumina WGS	HG002	Benchmark PSVGT on short reads
HG002	ftp://ftp-trace.ncbi.nlm.nih.gov/ReferenceSamples/giab/data/AshkenazimTrio/HG002_NA24385_son/NIST_HiSeq_HG002_Homogeneity-10953946/HG002_HiSeq300x_fastq/140609_D00360_0022_AH9UJNADXX/Project_RM8391_RM8392/Sample_2B2/2B2_CCGTCC_L001_R1_002.fastq.gz	Illumina WGS	HG002	Benchmark PSVGT on short reads
HG002	ftp://ftp-trace.ncbi.nlm.nih.gov/ReferenceSamples/giab/data/AshkenazimTrio/HG002_NA24385_son/NIST_HiSeq_HG002_Homogeneity-10953946/HG002_HiSeq300x_fastq/140609_D00360_0022_AH9UJNADXX/Project_RM8391_RM8392/Sample_2B2/2B2_CCGTCC_L002_R1_001.fastq.gz	Illumina WGS	HG002	Benchmark PSVGT on short reads
HG002	ftp://ftp-trace.ncbi.nlm.nih.gov/ReferenceSamples/giab/data/AshkenazimTrio/HG002_NA24385_son/NIST_HiSeq_HG002_Homogeneity-10953946/HG002_HiSeq300x_fastq/140609_D00360_0022_AH9UJNADXX/Project_RM8391_RM8392/Sample_2B2/2B2_CCGTCC_L002_R1_002.fastq.gz	Illumina WGS	HG002	Benchmark PSVGT on short reads
HG002	ftp://ftp-trace.ncbi.nlm.nih.gov/ReferenceSamples/giab/data/AshkenazimTrio/HG002_NA24385_son/NIST_HiSeq_HG002_Homogeneity-10953946/HG002_HiSeq300x_fastq/140609_D00360_0022_AH9UJNADXX/Project_RM8391_RM8392/Sample_2C1/2C1_AGTCAA_L001_R1_001.fastq.gz	Illumina WGS	HG002	Benchmark PSVGT on short reads
HG002	ftp://ftp-trace.ncbi.nlm.nih.gov/ReferenceSamples/giab/data/AshkenazimTrio/HG002_NA24385_son/NIST_HiSeq_HG002_Homogeneity-10953946/HG002_HiSeq300x_fastq/140609_D00360_0022_AH9UJNADXX/Project_RM8391_RM8392/Sample_2C1/2C1_AGTCAA_L001_R1_002.fastq.gz	Illumina WGS	HG002	Benchmark PSVGT on short reads
HG002	ftp://ftp-trace.ncbi.nlm.nih.gov/ReferenceSamples/giab/data/AshkenazimTrio/HG002_NA24385_son/NIST_HiSeq_HG002_Homogeneity-10953946/HG002_HiSeq300x_fastq/140609_D00360_0022_AH9UJNADXX/Project_RM8391_RM8392/Sample_2C1/2C1_AGTCAA_L002_R1_001.fastq.gz	Illumina WGS	HG002	Benchmark PSVGT on short reads
HG002	ftp://ftp-trace.ncbi.nlm.nih.gov/ReferenceSamples/giab/data/AshkenazimTrio/HG002_NA24385_son/NIST_HiSeq_HG002_Homogeneity-10953946/HG002_HiSeq300x_fastq/140609_D00360_0022_AH9UJNADXX/Project_RM8391_RM8392/Sample_2C1/2C1_AGTCAA_L002_R1_002.fastq.gz	Illumina WGS	HG002	Benchmark PSVGT on short reads
HG002	ftp://ftp-trace.ncbi.nlm.nih.gov/ReferenceSamples/giab/data/AshkenazimTrio/HG002_NA24385_son/NIST_HiSeq_HG002_Homogeneity-10953946/HG002_HiSeq300x_fastq/140609_D00360_0022_AH9UJNADXX/Project_RM8391_RM8392/Sample_2C2/2C2_AGTTCC_L001_R1_001.fastq.gz	Illumina WGS	HG002	Benchmark PSVGT on short reads
HG002	ftp://ftp-trace.ncbi.nlm.nih.gov/ReferenceSamples/giab/data/AshkenazimTrio/HG002_NA24385_son/NIST_HiSeq_HG002_Homogeneity-10953946/HG002_HiSeq300x_fastq/140609_D00360_0022_AH9UJNADXX/Project_RM8391_RM8392/Sample_2C2/2C2_AGTTCC_L001_R1_002.fastq.gz	Illumina WGS	HG002	Benchmark PSVGT on short reads
HG002	ftp://ftp-trace.ncbi.nlm.nih.gov/ReferenceSamples/giab/data/AshkenazimTrio/HG002_NA24385_son/NIST_HiSeq_HG002_Homogeneity-10953946/HG002_HiSeq300x_fastq/140609_D00360_0022_AH9UJNADXX/Project_RM8391_RM8392/Sample_2C2/2C2_AGTTCC_L002_R1_001.fastq.gz	Illumina WGS	HG002	Benchmark PSVGT on short reads
HG002	ftp://ftp-trace.ncbi.nlm.nih.gov/ReferenceSamples/giab/data/AshkenazimTrio/HG002_NA24385_son/NIST_HiSeq_HG002_Homogeneity-10953946/HG002_HiSeq300x_fastq/140609_D00360_0022_AH9UJNADXX/Project_RM8391_RM8392/Sample_2C2/2C2_AGTTCC_L002_R1_002.fastq.gz	Illumina WGS	HG002	Benchmark PSVGT on short reads
HG002	ftp://ftp-trace.ncbi.nlm.nih.gov/ReferenceSamples/giab/data/AshkenazimTrio/HG002_NA24385_son/NIST_HiSeq_HG002_Homogeneity-10953946/HG002_HiSeq300x_fastq/140609_D00360_0022_AH9UJNADXX/Project_RM8391_RM8392/Sample_2D1/2D1_ATGTCA_L001_R1_001.fastq.gz	Illumina WGS	HG002	Benchmark PSVGT on short reads
HG002	ftp://ftp-trace.ncbi.nlm.nih.gov/ReferenceSamples/giab/data/AshkenazimTrio/HG002_NA24385_son/NIST_HiSeq_HG002_Homogeneity-10953946/HG002_HiSeq300x_fastq/140609_D00360_0022_AH9UJNADXX/Project_RM8391_RM8392/Sample_2D1/2D1_ATGTCA_L001_R1_002.fastq.gz	Illumina WGS	HG002	Benchmark PSVGT on short reads
HG002	ftp://ftp-trace.ncbi.nlm.nih.gov/ReferenceSamples/giab/data/AshkenazimTrio/HG002_NA24385_son/NIST_HiSeq_HG002_Homogeneity-10953946/HG002_HiSeq300x_fastq/140609_D00360_0022_AH9UJNADXX/Project_RM8391_RM8392/Sample_2D1/2D1_ATGTCA_L002_R1_001.fastq.gz	Illumina WGS	HG002	Benchmark PSVGT on short reads
HG002	ftp://ftp-trace.ncbi.nlm.nih.gov/ReferenceSamples/giab/data/AshkenazimTrio/HG002_NA24385_son/NIST_HiSeq_HG002_Homogeneity-10953946/HG002_HiSeq300x_fastq/140609_D00360_0022_AH9UJNADXX/Project_RM8391_RM8392/Sample_2D1/2D1_ATGTCA_L002_R1_002.fastq.gz	Illumina WGS	HG002	Benchmark PSVGT on short reads
HG002	ftp://ftp-trace.ncbi.nlm.nih.gov/ReferenceSamples/giab/data/AshkenazimTrio/HG002_NA24385_son/NIST_HiSeq_HG002_Homogeneity-10953946/HG002_HiSeq300x_fastq/140609_D00360_0022_AH9UJNADXX/Project_RM8391_RM8392/Sample_2D2/2D2_GTCCGC_L001_R1_001.fastq.gz	Illumina WGS	HG002	Benchmark PSVGT on short reads
HG002	ftp://ftp-trace.ncbi.nlm.nih.gov/ReferenceSamples/giab/data/AshkenazimTrio/HG002_NA24385_son/NIST_HiSeq_HG002_Homogeneity-10953946/HG002_HiSeq300x_fastq/140609_D00360_0022_AH9UJNADXX/Project_RM8391_RM8392/Sample_2D2/2D2_GTCCGC_L001_R1_002.fastq.gz	Illumina WGS	HG002	Benchmark PSVGT on short reads
HG002	ftp://ftp-trace.ncbi.nlm.nih.gov/ReferenceSamples/giab/data/AshkenazimTrio/HG002_NA24385_son/NIST_HiSeq_HG002_Homogeneity-10953946/HG002_HiSeq300x_fastq/140609_D00360_0022_AH9UJNADXX/Project_RM8391_RM8392/Sample_2D2/2D2_GTCCGC_L002_R1_001.fastq.gz	Illumina WGS	HG002	Benchmark PSVGT on short reads
HG002	ftp://ftp-trace.ncbi.nlm.nih.gov/ReferenceSamples/giab/data/AshkenazimTrio/HG002_NA24385_son/NIST_HiSeq_HG002_Homogeneity-10953946/HG002_HiSeq300x_fastq/140609_D00360_0022_AH9UJNADXX/Project_RM8391_RM8392/Sample_2D2/2D2_GTCCGC_L002_R1_002.fastq.gz	Illumina WGS	HG002	Benchmark PSVGT on short reads
HG002	ftp://ftp-trace.ncbi.nlm.nih.gov/ReferenceSamples/giab/data/AshkenazimTrio/HG002_NA24385_son/NIST_HiSeq_HG002_Homogeneity-10953946/HG002_HiSeq300x_fastq/140609_D00360_0022_AH9UJNADXX/Project_RM8391_RM8392/Sample_2F1/2F1_ACAGTG_L001_R1_001.fastq.gz	Illumina WGS	HG002	Benchmark PSVGT on short reads
HG002	ftp://ftp-trace.ncbi.nlm.nih.gov/ReferenceSamples/giab/data/AshkenazimTrio/HG002_NA24385_son/NIST_HiSeq_HG002_Homogeneity-10953946/HG002_HiSeq300x_fastq/140609_D00360_0022_AH9UJNADXX/Project_RM8391_RM8392/Sample_2F1/2F1_ACAGTG_L001_R1_002.fastq.gz	Illumina WGS	HG002	Benchmark PSVGT on short reads
HG002	ftp://ftp-trace.ncbi.nlm.nih.gov/ReferenceSamples/giab/data/AshkenazimTrio/HG002_NA24385_son/NIST_HiSeq_HG002_Homogeneity-10953946/HG002_HiSeq300x_fastq/140609_D00360_0022_AH9UJNADXX/Project_RM8391_RM8392/Sample_2F1/2F1_ACAGTG_L001_R1_003.fastq.gz	Illumina WGS	HG002	Benchmark PSVGT on short reads
HG002	ftp://ftp-trace.ncbi.nlm.nih.gov/ReferenceSamples/giab/data/AshkenazimTrio/HG002_NA24385_son/NIST_HiSeq_HG002_Homogeneity-10953946/HG002_HiSeq300x_fastq/140609_D00360_0022_AH9UJNADXX/Project_RM8391_RM8392/Sample_2F1/2F1_ACAGTG_L001_R1_004.fastq.gz	Illumina WGS	HG002	Benchmark PSVGT on short reads
HG002	ftp://ftp-trace.ncbi.nlm.nih.gov/ReferenceSamples/giab/data/AshkenazimTrio/HG002_NA24385_son/NIST_HiSeq_HG002_Homogeneity-10953946/HG002_HiSeq300x_fastq/140609_D00360_0022_AH9UJNADXX/Project_RM8391_RM8392/Sample_2F1/2F1_ACAGTG_L001_R1_005.fastq.gz	Illumina WGS	HG002	Benchmark PSVGT on short reads
HG002	ftp://ftp-trace.ncbi.nlm.nih.gov/ReferenceSamples/giab/data/AshkenazimTrio/HG002_NA24385_son/NIST_HiSeq_HG002_Homogeneity-10953946/HG002_HiSeq300x_fastq/140609_D00360_0022_AH9UJNADXX/Project_RM8391_RM8392/Sample_2F1/2F1_ACAGTG_L001_R1_006.fastq.gz	Illumina WGS	HG002	Benchmark PSVGT on short reads
HG002	ftp://ftp-trace.ncbi.nlm.nih.gov/ReferenceSamples/giab/data/AshkenazimTrio/HG002_NA24385_son/NIST_HiSeq_HG002_Homogeneity-10953946/HG002_HiSeq300x_fastq/140609_D00360_0022_AH9UJNADXX/Project_RM8391_RM8392/Sample_2F1/2F1_ACAGTG_L001_R1_007.fastq.gz	Illumina WGS	HG002	Benchmark PSVGT on short reads
HG002	ftp://ftp-trace.ncbi.nlm.nih.gov/ReferenceSamples/giab/data/AshkenazimTrio/HG002_NA24385_son/NIST_HiSeq_HG002_Homogeneity-10953946/HG002_HiSeq300x_fastq/140609_D00360_0022_AH9UJNADXX/Project_RM8391_RM8392/Sample_2F1/2F1_ACAGTG_L002_R1_001.fastq.gz	Illumina WGS	HG002	Benchmark PSVGT on short reads
HG002	ftp://ftp-trace.ncbi.nlm.nih.gov/ReferenceSamples/giab/data/AshkenazimTrio/HG002_NA24385_son/NIST_HiSeq_HG002_Homogeneity-10953946/HG002_HiSeq300x_fastq/140609_D00360_0022_AH9UJNADXX/Project_RM8391_RM8392/Sample_2F1/2F1_ACAGTG_L002_R1_002.fastq.gz	Illumina WGS	HG002	Benchmark PSVGT on short reads
HG002	ftp://ftp-trace.ncbi.nlm.nih.gov/ReferenceSamples/giab/data/AshkenazimTrio/HG002_NA24385_son/NIST_HiSeq_HG002_Homogeneity-10953946/HG002_HiSeq300x_fastq/140609_D00360_0022_AH9UJNADXX/Project_RM8391_RM8392/Sample_2F1/2F1_ACAGTG_L002_R1_003.fastq.gz	Illumina WGS	HG002	Benchmark PSVGT on short reads
HG002	ftp://ftp-trace.ncbi.nlm.nih.gov/ReferenceSamples/giab/data/AshkenazimTrio/HG002_NA24385_son/NIST_HiSeq_HG002_Homogeneity-10953946/HG002_HiSeq300x_fastq/140609_D00360_0022_AH9UJNADXX/Project_RM8391_RM8392/Sample_2F1/2F1_ACAGTG_L002_R1_004.fastq.gz	Illumina WGS	HG002	Benchmark PSVGT on short reads
HG002	ftp://ftp-trace.ncbi.nlm.nih.gov/ReferenceSamples/giab/data/AshkenazimTrio/HG002_NA24385_son/NIST_HiSeq_HG002_Homogeneity-10953946/HG002_HiSeq300x_fastq/140609_D00360_0022_AH9UJNADXX/Project_RM8391_RM8392/Sample_2F1/2F1_ACAGTG_L002_R1_005.fastq.gz	Illumina WGS	HG002	Benchmark PSVGT on short reads
HG002	ftp://ftp-trace.ncbi.nlm.nih.gov/ReferenceSamples/giab/data/AshkenazimTrio/HG002_NA24385_son/NIST_HiSeq_HG002_Homogeneity-10953946/HG002_HiSeq300x_fastq/140609_D00360_0022_AH9UJNADXX/Project_RM8391_RM8392/Sample_2F1/2F1_ACAGTG_L002_R1_006.fastq.gz	Illumina WGS	HG002	Benchmark PSVGT on short reads
HG002	ftp://ftp-trace.ncbi.nlm.nih.gov/ReferenceSamples/giab/data/AshkenazimTrio/HG002_NA24385_son/NIST_HiSeq_HG002_Homogeneity-10953946/HG002_HiSeq300x_fastq/140609_D00360_0022_AH9UJNADXX/Project_RM8391_RM8392/Sample_2F1/2F1_ACAGTG_L002_R1_007.fastq.gz	Illumina WGS	HG002	Benchmark PSVGT on short reads
HG002	ftp://ftp-trace.ncbi.nlm.nih.gov/ReferenceSamples/giab/data/AshkenazimTrio/HG002_NA24385_son/NIST_HiSeq_HG002_Homogeneity-10953946/HG002_HiSeq300x_fastq/140609_D00360_0022_AH9UJNADXX/Project_RM8391_RM8392/Sample_2F2/2F2_GCCAAT_L001_R1_001.fastq.gz	Illumina WGS	HG002	Benchmark PSVGT on short reads
HG002	ftp://ftp-trace.ncbi.nlm.nih.gov/ReferenceSamples/giab/data/AshkenazimTrio/HG002_NA24385_son/NIST_HiSeq_HG002_Homogeneity-10953946/HG002_HiSeq300x_fastq/140609_D00360_0022_AH9UJNADXX/Project_RM8391_RM8392/Sample_2F2/2F2_GCCAAT_L001_R1_002.fastq.gz	Illumina WGS	HG002	Benchmark PSVGT on short reads
HG002	ftp://ftp-trace.ncbi.nlm.nih.gov/ReferenceSamples/giab/data/AshkenazimTrio/HG002_NA24385_son/NIST_HiSeq_HG002_Homogeneity-10953946/HG002_HiSeq300x_fastq/140609_D00360_0022_AH9UJNADXX/Project_RM8391_RM8392/Sample_2F2/2F2_GCCAAT_L001_R1_003.fastq.gz	Illumina WGS	HG002	Benchmark PSVGT on short reads
HG002	ftp://ftp-trace.ncbi.nlm.nih.gov/ReferenceSamples/giab/data/AshkenazimTrio/HG002_NA24385_son/NIST_HiSeq_HG002_Homogeneity-10953946/HG002_HiSeq300x_fastq/140609_D00360_0022_AH9UJNADXX/Project_RM8391_RM8392/Sample_2F2/2F2_GCCAAT_L001_R1_004.fastq.gz	Illumina WGS	HG002	Benchmark PSVGT on short reads
HG002	ftp://ftp-trace.ncbi.nlm.nih.gov/ReferenceSamples/giab/data/AshkenazimTrio/HG002_NA24385_son/NIST_HiSeq_HG002_Homogeneity-10953946/HG002_HiSeq300x_fastq/140609_D00360_0022_AH9UJNADXX/Project_RM8391_RM8392/Sample_2F2/2F2_GCCAAT_L001_R1_005.fastq.gz	Illumina WGS	HG002	Benchmark PSVGT on short reads
HG002	ftp://ftp-trace.ncbi.nlm.nih.gov/ReferenceSamples/giab/data/AshkenazimTrio/HG002_NA24385_son/NIST_HiSeq_HG002_Homogeneity-10953946/HG002_HiSeq300x_fastq/140609_D00360_0022_AH9UJNADXX/Project_RM8391_RM8392/Sample_2F2/2F2_GCCAAT_L001_R1_006.fastq.gz	Illumina WGS	HG002	Benchmark PSVGT on short reads
HG002	ftp://ftp-trace.ncbi.nlm.nih.gov/ReferenceSamples/giab/data/AshkenazimTrio/HG002_NA24385_son/NIST_HiSeq_HG002_Homogeneity-10953946/HG002_HiSeq300x_fastq/140609_D00360_0022_AH9UJNADXX/Project_RM8391_RM8392/Sample_2F2/2F2_GCCAAT_L002_R1_001.fastq.gz	Illumina WGS	HG002	Benchmark PSVGT on short reads
HG002	ftp://ftp-trace.ncbi.nlm.nih.gov/ReferenceSamples/giab/data/AshkenazimTrio/HG002_NA24385_son/NIST_HiSeq_HG002_Homogeneity-10953946/HG002_HiSeq300x_fastq/140609_D00360_0022_AH9UJNADXX/Project_RM8391_RM8392/Sample_2F2/2F2_GCCAAT_L002_R1_002.fastq.gz	Illumina WGS	HG002	Benchmark PSVGT on short reads
HG002	ftp://ftp-trace.ncbi.nlm.nih.gov/ReferenceSamples/giab/data/AshkenazimTrio/HG002_NA24385_son/NIST_HiSeq_HG002_Homogeneity-10953946/HG002_HiSeq300x_fastq/140609_D00360_0022_AH9UJNADXX/Project_RM8391_RM8392/Sample_2F2/2F2_GCCAAT_L002_R1_003.fastq.gz	Illumina WGS	HG002	Benchmark PSVGT on short reads
HG002	ftp://ftp-trace.ncbi.nlm.nih.gov/ReferenceSamples/giab/data/AshkenazimTrio/HG002_NA24385_son/NIST_HiSeq_HG002_Homogeneity-10953946/HG002_HiSeq300x_fastq/140609_D00360_0022_AH9UJNADXX/Project_RM8391_RM8392/Sample_2F2/2F2_GCCAAT_L002_R1_004.fastq.gz	Illumina WGS	HG002	Benchmark PSVGT on short reads
HG002	ftp://ftp-trace.ncbi.nlm.nih.gov/ReferenceSamples/giab/data/AshkenazimTrio/HG002_NA24385_son/NIST_HiSeq_HG002_Homogeneity-10953946/HG002_HiSeq300x_fastq/140609_D00360_0022_AH9UJNADXX/Project_RM8391_RM8392/Sample_2F2/2F2_GCCAAT_L002_R1_005.fastq.gz	Illumina WGS	HG002	Benchmark PSVGT on short reads
HG002	ftp://ftp-trace.ncbi.nlm.nih.gov/ReferenceSamples/giab/data/AshkenazimTrio/HG002_NA24385_son/NIST_HiSeq_HG002_Homogeneity-10953946/HG002_HiSeq300x_fastq/140609_D00360_0022_AH9UJNADXX/Project_RM8391_RM8392/Sample_2F2/2F2_GCCAAT_L002_R1_006.fastq.gz	Illumina WGS	HG002	Benchmark PSVGT on short reads
HG002	ftp://ftp-trace.ncbi.nlm.nih.gov/ReferenceSamples/giab/data/AshkenazimTrio/HG002_NA24385_son/NIST_HiSeq_HG002_Homogeneity-10953946/HG002_HiSeq300x_fastq/140609_D00360_0022_AH9UJNADXX/Project_RM8391_RM8392/Sample_2L1/2L1_CTTGTA_L001_R1_001.fastq.gz	Illumina WGS	HG002	Benchmark PSVGT on short reads
HG002	ftp://ftp-trace.ncbi.nlm.nih.gov/ReferenceSamples/giab/data/AshkenazimTrio/HG002_NA24385_son/NIST_HiSeq_HG002_Homogeneity-10953946/HG002_HiSeq300x_fastq/140609_D00360_0022_AH9UJNADXX/Project_RM8391_RM8392/Sample_2L1/2L1_CTTGTA_L001_R1_002.fastq.gz	Illumina WGS	HG002	Benchmark PSVGT on short reads
HG002	ftp://ftp-trace.ncbi.nlm.nih.gov/ReferenceSamples/giab/data/AshkenazimTrio/HG002_NA24385_son/NIST_HiSeq_HG002_Homogeneity-10953946/HG002_HiSeq300x_fastq/140609_D00360_0022_AH9UJNADXX/Project_RM8391_RM8392/Sample_2L1/2L1_CTTGTA_L001_R1_003.fastq.gz	Illumina WGS	HG002	Benchmark PSVGT on short reads
HG002	ftp://ftp-trace.ncbi.nlm.nih.gov/ReferenceSamples/giab/data/AshkenazimTrio/HG002_NA24385_son/NIST_HiSeq_HG002_Homogeneity-10953946/HG002_HiSeq300x_fastq/140609_D00360_0022_AH9UJNADXX/Project_RM8391_RM8392/Sample_2L1/2L1_CTTGTA_L001_R1_004.fastq.gz	Illumina WGS	HG002	Benchmark PSVGT on short reads
HG002	ftp://ftp-trace.ncbi.nlm.nih.gov/ReferenceSamples/giab/data/AshkenazimTrio/HG002_NA24385_son/NIST_HiSeq_HG002_Homogeneity-10953946/HG002_HiSeq300x_fastq/140609_D00360_0022_AH9UJNADXX/Project_RM8391_RM8392/Sample_2L1/2L1_CTTGTA_L001_R1_005.fastq.gz	Illumina WGS	HG002	Benchmark PSVGT on short reads
HG002	ftp://ftp-trace.ncbi.nlm.nih.gov/ReferenceSamples/giab/data/AshkenazimTrio/HG002_NA24385_son/NIST_HiSeq_HG002_Homogeneity-10953946/HG002_HiSeq300x_fastq/140609_D00360_0022_AH9UJNADXX/Project_RM8391_RM8392/Sample_2L1/2L1_CTTGTA_L001_R1_006.fastq.gz	Illumina WGS	HG002	Benchmark PSVGT on short reads
HG002	ftp://ftp-trace.ncbi.nlm.nih.gov/ReferenceSamples/giab/data/AshkenazimTrio/HG002_NA24385_son/NIST_HiSeq_HG002_Homogeneity-10953946/HG002_HiSeq300x_fastq/140609_D00360_0022_AH9UJNADXX/Project_RM8391_RM8392/Sample_2L1/2L1_CTTGTA_L002_R1_001.fastq.gz	Illumina WGS	HG002	Benchmark PSVGT on short reads
HG002	ftp://ftp-trace.ncbi.nlm.nih.gov/ReferenceSamples/giab/data/AshkenazimTrio/HG002_NA24385_son/NIST_HiSeq_HG002_Homogeneity-10953946/HG002_HiSeq300x_fastq/140609_D00360_0022_AH9UJNADXX/Project_RM8391_RM8392/Sample_2L1/2L1_CTTGTA_L002_R1_002.fastq.gz	Illumina WGS	HG002	Benchmark PSVGT on short reads
HG002	ftp://ftp-trace.ncbi.nlm.nih.gov/ReferenceSamples/giab/data/AshkenazimTrio/HG002_NA24385_son/NIST_HiSeq_HG002_Homogeneity-10953946/HG002_HiSeq300x_fastq/140609_D00360_0022_AH9UJNADXX/Project_RM8391_RM8392/Sample_2L1/2L1_CTTGTA_L002_R1_003.fastq.gz	Illumina WGS	HG002	Benchmark PSVGT on short reads
HG002	ftp://ftp-trace.ncbi.nlm.nih.gov/ReferenceSamples/giab/data/AshkenazimTrio/HG002_NA24385_son/NIST_HiSeq_HG002_Homogeneity-10953946/HG002_HiSeq300x_fastq/140609_D00360_0022_AH9UJNADXX/Project_RM8391_RM8392/Sample_2L1/2L1_CTTGTA_L002_R1_004.fastq.gz	Illumina WGS	HG002	Benchmark PSVGT on short reads
HG002	ftp://ftp-trace.ncbi.nlm.nih.gov/ReferenceSamples/giab/data/AshkenazimTrio/HG002_NA24385_son/NIST_HiSeq_HG002_Homogeneity-10953946/HG002_HiSeq300x_fastq/140609_D00360_0022_AH9UJNADXX/Project_RM8391_RM8392/Sample_2L1/2L1_CTTGTA_L002_R1_005.fastq.gz	Illumina WGS	HG002	Benchmark PSVGT on short reads
HG002	ftp://ftp-trace.ncbi.nlm.nih.gov/ReferenceSamples/giab/data/AshkenazimTrio/HG002_NA24385_son/NIST_HiSeq_HG002_Homogeneity-10953946/HG002_HiSeq300x_fastq/140609_D00360_0022_AH9UJNADXX/Project_RM8391_RM8392/Sample_2L1/2L1_CTTGTA_L002_R1_006.fastq.gz	Illumina WGS	HG002	Benchmark PSVGT on short reads
HG002	ftp://ftp-trace.ncbi.nlm.nih.gov/ReferenceSamples/giab/data/AshkenazimTrio/HG002_NA24385_son/NIST_HiSeq_HG002_Homogeneity-10953946/HG002_HiSeq300x_fastq/140609_D00360_0022_AH9UJNADXX/Project_RM8391_RM8392/Sample_2L2/2L2_GTGAAA_L001_R1_001.fastq.gz	Illumina WGS	HG002	Benchmark PSVGT on short reads
HG002	ftp://ftp-trace.ncbi.nlm.nih.gov/ReferenceSamples/giab/data/AshkenazimTrio/HG002_NA24385_son/NIST_HiSeq_HG002_Homogeneity-10953946/HG002_HiSeq300x_fastq/140609_D00360_0022_AH9UJNADXX/Project_RM8391_RM8392/Sample_2L2/2L2_GTGAAA_L001_R1_002.fastq.gz	Illumina WGS	HG002	Benchmark PSVGT on short reads
HG002	ftp://ftp-trace.ncbi.nlm.nih.gov/ReferenceSamples/giab/data/AshkenazimTrio/HG002_NA24385_son/NIST_HiSeq_HG002_Homogeneity-10953946/HG002_HiSeq300x_fastq/140609_D00360_0022_AH9UJNADXX/Project_RM8391_RM8392/Sample_2L2/2L2_GTGAAA_L001_R1_003.fastq.gz	Illumina WGS	HG002	Benchmark PSVGT on short reads
HG002	ftp://ftp-trace.ncbi.nlm.nih.gov/ReferenceSamples/giab/data/AshkenazimTrio/HG002_NA24385_son/NIST_HiSeq_HG002_Homogeneity-10953946/HG002_HiSeq300x_fastq/140609_D00360_0022_AH9UJNADXX/Project_RM8391_RM8392/Sample_2L2/2L2_GTGAAA_L001_R1_004.fastq.gz	Illumina WGS	HG002	Benchmark PSVGT on short reads
HG002	ftp://ftp-trace.ncbi.nlm.nih.gov/ReferenceSamples/giab/data/AshkenazimTrio/HG002_NA24385_son/NIST_HiSeq_HG002_Homogeneity-10953946/HG002_HiSeq300x_fastq/140609_D00360_0022_AH9UJNADXX/Project_RM8391_RM8392/Sample_2L2/2L2_GTGAAA_L001_R1_005.fastq.gz	Illumina WGS	HG002	Benchmark PSVGT on short reads
HG002	ftp://ftp-trace.ncbi.nlm.nih.gov/ReferenceSamples/giab/data/AshkenazimTrio/HG002_NA24385_son/NIST_HiSeq_HG002_Homogeneity-10953946/HG002_HiSeq300x_fastq/140609_D00360_0022_AH9UJNADXX/Project_RM8391_RM8392/Sample_2L2/2L2_GTGAAA_L001_R1_006.fastq.gz	Illumina WGS	HG002	Benchmark PSVGT on short reads
HG002	ftp://ftp-trace.ncbi.nlm.nih.gov/ReferenceSamples/giab/data/AshkenazimTrio/HG002_NA24385_son/NIST_HiSeq_HG002_Homogeneity-10953946/HG002_HiSeq300x_fastq/140609_D00360_0022_AH9UJNADXX/Project_RM8391_RM8392/Sample_2L2/2L2_GTGAAA_L002_R1_001.fastq.gz	Illumina WGS	HG002	Benchmark PSVGT on short reads
HG002	ftp://ftp-trace.ncbi.nlm.nih.gov/ReferenceSamples/giab/data/AshkenazimTrio/HG002_NA24385_son/NIST_HiSeq_HG002_Homogeneity-10953946/HG002_HiSeq300x_fastq/140609_D00360_0022_AH9UJNADXX/Project_RM8391_RM8392/Sample_2L2/2L2_GTGAAA_L002_R1_002.fastq.gz	Illumina WGS	HG002	Benchmark PSVGT on short reads
HG002	ftp://ftp-trace.ncbi.nlm.nih.gov/ReferenceSamples/giab/data/AshkenazimTrio/HG002_NA24385_son/NIST_HiSeq_HG002_Homogeneity-10953946/HG002_HiSeq300x_fastq/140609_D00360_0022_AH9UJNADXX/Project_RM8391_RM8392/Sample_2L2/2L2_GTGAAA_L002_R1_003.fastq.gz	Illumina WGS	HG002	Benchmark PSVGT on short reads
HG002	ftp://ftp-trace.ncbi.nlm.nih.gov/ReferenceSamples/giab/data/AshkenazimTrio/HG002_NA24385_son/NIST_HiSeq_HG002_Homogeneity-10953946/HG002_HiSeq300x_fastq/140609_D00360_0022_AH9UJNADXX/Project_RM8391_RM8392/Sample_2L2/2L2_GTGAAA_L002_R1_004.fastq.gz	Illumina WGS	HG002	Benchmark PSVGT on short reads
HG002	ftp://ftp-trace.ncbi.nlm.nih.gov/ReferenceSamples/giab/data/AshkenazimTrio/HG002_NA24385_son/NIST_HiSeq_HG002_Homogeneity-10953946/HG002_HiSeq300x_fastq/140609_D00360_0022_AH9UJNADXX/Project_RM8391_RM8392/Sample_2L2/2L2_GTGAAA_L002_R1_005.fastq.gz	Illumina WGS	HG002	Benchmark PSVGT on short reads
HG002	ftp://ftp-trace.ncbi.nlm.nih.gov/ReferenceSamples/giab/data/AshkenazimTrio/HG002_NA24385_son/NIST_HiSeq_HG002_Homogeneity-10953946/HG002_HiSeq300x_fastq/140609_D00360_0022_AH9UJNADXX/Project_RM8391_RM8392/Sample_2L2/2L2_GTGAAA_L002_R1_006.fastq.gz	Illumina WGS	HG002	Benchmark PSVGT on short reads
HG002	ftp://ftp-trace.ncbi.nlm.nih.gov/ReferenceSamples/giab/data/AshkenazimTrio/HG002_NA24385_son/NIST_HiSeq_HG002_Homogeneity-10953946/HG002_HiSeq300x_fastq/140609_D00360_0023_BH9UD5ADXX/Project_RM8391_RM8392/Sample_2A1/2A1_CGATGT_L001_R1_001.fastq.gz	Illumina WGS	HG002	Benchmark PSVGT on short reads
HG002	ftp://ftp-trace.ncbi.nlm.nih.gov/ReferenceSamples/giab/data/AshkenazimTrio/HG002_NA24385_son/NIST_HiSeq_HG002_Homogeneity-10953946/HG002_HiSeq300x_fastq/140609_D00360_0023_BH9UD5ADXX/Project_RM8391_RM8392/Sample_2A1/2A1_CGATGT_L001_R1_002.fastq.gz	Illumina WGS	HG002	Benchmark PSVGT on short reads
HG002	ftp://ftp-trace.ncbi.nlm.nih.gov/ReferenceSamples/giab/data/AshkenazimTrio/HG002_NA24385_son/NIST_HiSeq_HG002_Homogeneity-10953946/HG002_HiSeq300x_fastq/140609_D00360_0023_BH9UD5ADXX/Project_RM8391_RM8392/Sample_2A1/2A1_CGATGT_L002_R1_001.fastq.gz	Illumina WGS	HG002	Benchmark PSVGT on short reads
HG002	ftp://ftp-trace.ncbi.nlm.nih.gov/ReferenceSamples/giab/data/AshkenazimTrio/HG002_NA24385_son/NIST_HiSeq_HG002_Homogeneity-10953946/HG002_HiSeq300x_fastq/140609_D00360_0023_BH9UD5ADXX/Project_RM8391_RM8392/Sample_2A1/2A1_CGATGT_L002_R1_002.fastq.gz	Illumina WGS	HG002	Benchmark PSVGT on short reads
HG002	ftp://ftp-trace.ncbi.nlm.nih.gov/ReferenceSamples/giab/data/AshkenazimTrio/HG002_NA24385_son/NIST_HiSeq_HG002_Homogeneity-10953946/HG002_HiSeq300x_fastq/140609_D00360_0023_BH9UD5ADXX/Project_RM8391_RM8392/Sample_2A2/2A2_TGACCA_L001_R1_001.fastq.gz	Illumina WGS	HG002	Benchmark PSVGT on short reads
HG002	ftp://ftp-trace.ncbi.nlm.nih.gov/ReferenceSamples/giab/data/AshkenazimTrio/HG002_NA24385_son/NIST_HiSeq_HG002_Homogeneity-10953946/HG002_HiSeq300x_fastq/140609_D00360_0023_BH9UD5ADXX/Project_RM8391_RM8392/Sample_2A2/2A2_TGACCA_L001_R1_002.fastq.gz	Illumina WGS	HG002	Benchmark PSVGT on short reads
HG002	ftp://ftp-trace.ncbi.nlm.nih.gov/ReferenceSamples/giab/data/AshkenazimTrio/HG002_NA24385_son/NIST_HiSeq_HG002_Homogeneity-10953946/HG002_HiSeq300x_fastq/140609_D00360_0023_BH9UD5ADXX/Project_RM8391_RM8392/Sample_2A2/2A2_TGACCA_L002_R1_001.fastq.gz	Illumina WGS	HG002	Benchmark PSVGT on short reads
HG002	ftp://ftp-trace.ncbi.nlm.nih.gov/ReferenceSamples/giab/data/AshkenazimTrio/HG002_NA24385_son/NIST_HiSeq_HG002_Homogeneity-10953946/HG002_HiSeq300x_fastq/140609_D00360_0023_BH9UD5ADXX/Project_RM8391_RM8392/Sample_2A2/2A2_TGACCA_L002_R1_002.fastq.gz	Illumina WGS	HG002	Benchmark PSVGT on short reads
HG002	ftp://ftp-trace.ncbi.nlm.nih.gov/ReferenceSamples/giab/data/AshkenazimTrio/HG002_NA24385_son/NIST_HiSeq_HG002_Homogeneity-10953946/HG002_HiSeq300x_fastq/140609_D00360_0023_BH9UD5ADXX/Project_RM8391_RM8392/Sample_2B1/2B1_CAGATC_L001_R1_001.fastq.gz	Illumina WGS	HG002	Benchmark PSVGT on short reads
HG002	ftp://ftp-trace.ncbi.nlm.nih.gov/ReferenceSamples/giab/data/AshkenazimTrio/HG002_NA24385_son/NIST_HiSeq_HG002_Homogeneity-10953946/HG002_HiSeq300x_fastq/140609_D00360_0023_BH9UD5ADXX/Project_RM8391_RM8392/Sample_2B1/2B1_CAGATC_L001_R1_002.fastq.gz	Illumina WGS	HG002	Benchmark PSVGT on short reads
HG002	ftp://ftp-trace.ncbi.nlm.nih.gov/ReferenceSamples/giab/data/AshkenazimTrio/HG002_NA24385_son/NIST_HiSeq_HG002_Homogeneity-10953946/HG002_HiSeq300x_fastq/140609_D00360_0023_BH9UD5ADXX/Project_RM8391_RM8392/Sample_2B1/2B1_CAGATC_L002_R1_001.fastq.gz	Illumina WGS	HG002	Benchmark PSVGT on short reads
HG002	ftp://ftp-trace.ncbi.nlm.nih.gov/ReferenceSamples/giab/data/AshkenazimTrio/HG002_NA24385_son/NIST_HiSeq_HG002_Homogeneity-10953946/HG002_HiSeq300x_fastq/140609_D00360_0023_BH9UD5ADXX/Project_RM8391_RM8392/Sample_2B1/2B1_CAGATC_L002_R1_002.fastq.gz	Illumina WGS	HG002	Benchmark PSVGT on short reads
HG002	ftp://ftp-trace.ncbi.nlm.nih.gov/ReferenceSamples/giab/data/AshkenazimTrio/HG002_NA24385_son/NIST_HiSeq_HG002_Homogeneity-10953946/HG002_HiSeq300x_fastq/140609_D00360_0023_BH9UD5ADXX/Project_RM8391_RM8392/Sample_2B2/2B2_CCGTCC_L001_R1_001.fastq.gz	Illumina WGS	HG002	Benchmark PSVGT on short reads
HG002	ftp://ftp-trace.ncbi.nlm.nih.gov/ReferenceSamples/giab/data/AshkenazimTrio/HG002_NA24385_son/NIST_HiSeq_HG002_Homogeneity-10953946/HG002_HiSeq300x_fastq/140609_D00360_0023_BH9UD5ADXX/Project_RM8391_RM8392/Sample_2B2/2B2_CCGTCC_L001_R1_002.fastq.gz	Illumina WGS	HG002	Benchmark PSVGT on short reads
HG002	ftp://ftp-trace.ncbi.nlm.nih.gov/ReferenceSamples/giab/data/AshkenazimTrio/HG002_NA24385_son/NIST_HiSeq_HG002_Homogeneity-10953946/HG002_HiSeq300x_fastq/140609_D00360_0023_BH9UD5ADXX/Project_RM8391_RM8392/Sample_2B2/2B2_CCGTCC_L002_R1_001.fastq.gz	Illumina WGS	HG002	Benchmark PSVGT on short reads
HG002	ftp://ftp-trace.ncbi.nlm.nih.gov/ReferenceSamples/giab/data/AshkenazimTrio/HG002_NA24385_son/NIST_HiSeq_HG002_Homogeneity-10953946/HG002_HiSeq300x_fastq/140609_D00360_0023_BH9UD5ADXX/Project_RM8391_RM8392/Sample_2B2/2B2_CCGTCC_L002_R1_002.fastq.gz	Illumina WGS	HG002	Benchmark PSVGT on short reads
HG002	ftp://ftp-trace.ncbi.nlm.nih.gov/ReferenceSamples/giab/data/AshkenazimTrio/HG002_NA24385_son/NIST_HiSeq_HG002_Homogeneity-10953946/HG002_HiSeq300x_fastq/140609_D00360_0023_BH9UD5ADXX/Project_RM8391_RM8392/Sample_2C1/2C1_AGTCAA_L001_R1_001.fastq.gz	Illumina WGS	HG002	Benchmark PSVGT on short reads
HG002	ftp://ftp-trace.ncbi.nlm.nih.gov/ReferenceSamples/giab/data/AshkenazimTrio/HG002_NA24385_son/NIST_HiSeq_HG002_Homogeneity-10953946/HG002_HiSeq300x_fastq/140609_D00360_0023_BH9UD5ADXX/Project_RM8391_RM8392/Sample_2C1/2C1_AGTCAA_L001_R1_002.fastq.gz	Illumina WGS	HG002	Benchmark PSVGT on short reads
HG002	ftp://ftp-trace.ncbi.nlm.nih.gov/ReferenceSamples/giab/data/AshkenazimTrio/HG002_NA24385_son/NIST_HiSeq_HG002_Homogeneity-10953946/HG002_HiSeq300x_fastq/140609_D00360_0023_BH9UD5ADXX/Project_RM8391_RM8392/Sample_2C1/2C1_AGTCAA_L002_R1_001.fastq.gz	Illumina WGS	HG002	Benchmark PSVGT on short reads
HG002	ftp://ftp-trace.ncbi.nlm.nih.gov/ReferenceSamples/giab/data/AshkenazimTrio/HG002_NA24385_son/NIST_HiSeq_HG002_Homogeneity-10953946/HG002_HiSeq300x_fastq/140609_D00360_0023_BH9UD5ADXX/Project_RM8391_RM8392/Sample_2C1/2C1_AGTCAA_L002_R1_002.fastq.gz	Illumina WGS	HG002	Benchmark PSVGT on short reads
HG002	ftp://ftp-trace.ncbi.nlm.nih.gov/ReferenceSamples/giab/data/AshkenazimTrio/HG002_NA24385_son/NIST_HiSeq_HG002_Homogeneity-10953946/HG002_HiSeq300x_fastq/140609_D00360_0023_BH9UD5ADXX/Project_RM8391_RM8392/Sample_2C2/2C2_AGTTCC_L001_R1_001.fastq.gz	Illumina WGS	HG002	Benchmark PSVGT on short reads
HG002	ftp://ftp-trace.ncbi.nlm.nih.gov/ReferenceSamples/giab/data/AshkenazimTrio/HG002_NA24385_son/NIST_HiSeq_HG002_Homogeneity-10953946/HG002_HiSeq300x_fastq/140609_D00360_0023_BH9UD5ADXX/Project_RM8391_RM8392/Sample_2C2/2C2_AGTTCC_L001_R1_002.fastq.gz	Illumina WGS	HG002	Benchmark PSVGT on short reads
HG002	ftp://ftp-trace.ncbi.nlm.nih.gov/ReferenceSamples/giab/data/AshkenazimTrio/HG002_NA24385_son/NIST_HiSeq_HG002_Homogeneity-10953946/HG002_HiSeq300x_fastq/140609_D00360_0023_BH9UD5ADXX/Project_RM8391_RM8392/Sample_2C2/2C2_AGTTCC_L002_R1_001.fastq.gz	Illumina WGS	HG002	Benchmark PSVGT on short reads
HG002	ftp://ftp-trace.ncbi.nlm.nih.gov/ReferenceSamples/giab/data/AshkenazimTrio/HG002_NA24385_son/NIST_HiSeq_HG002_Homogeneity-10953946/HG002_HiSeq300x_fastq/140609_D00360_0023_BH9UD5ADXX/Project_RM8391_RM8392/Sample_2C2/2C2_AGTTCC_L002_R1_002.fastq.gz	Illumina WGS	HG002	Benchmark PSVGT on short reads
HG002	ftp://ftp-trace.ncbi.nlm.nih.gov/ReferenceSamples/giab/data/AshkenazimTrio/HG002_NA24385_son/NIST_HiSeq_HG002_Homogeneity-10953946/HG002_HiSeq300x_fastq/140609_D00360_0023_BH9UD5ADXX/Project_RM8391_RM8392/Sample_2D1/2D1_ATGTCA_L001_R1_001.fastq.gz	Illumina WGS	HG002	Benchmark PSVGT on short reads
HG002	ftp://ftp-trace.ncbi.nlm.nih.gov/ReferenceSamples/giab/data/AshkenazimTrio/HG002_NA24385_son/NIST_HiSeq_HG002_Homogeneity-10953946/HG002_HiSeq300x_fastq/140609_D00360_0023_BH9UD5ADXX/Project_RM8391_RM8392/Sample_2D1/2D1_ATGTCA_L001_R1_002.fastq.gz	Illumina WGS	HG002	Benchmark PSVGT on short reads
HG002	ftp://ftp-trace.ncbi.nlm.nih.gov/ReferenceSamples/giab/data/AshkenazimTrio/HG002_NA24385_son/NIST_HiSeq_HG002_Homogeneity-10953946/HG002_HiSeq300x_fastq/140609_D00360_0023_BH9UD5ADXX/Project_RM8391_RM8392/Sample_2D1/2D1_ATGTCA_L002_R1_001.fastq.gz	Illumina WGS	HG002	Benchmark PSVGT on short reads
HG002	ftp://ftp-trace.ncbi.nlm.nih.gov/ReferenceSamples/giab/data/AshkenazimTrio/HG002_NA24385_son/NIST_HiSeq_HG002_Homogeneity-10953946/HG002_HiSeq300x_fastq/140609_D00360_0023_BH9UD5ADXX/Project_RM8391_RM8392/Sample_2D1/2D1_ATGTCA_L002_R1_002.fastq.gz	Illumina WGS	HG002	Benchmark PSVGT on short reads
HG002	ftp://ftp-trace.ncbi.nlm.nih.gov/ReferenceSamples/giab/data/AshkenazimTrio/HG002_NA24385_son/NIST_HiSeq_HG002_Homogeneity-10953946/HG002_HiSeq300x_fastq/140609_D00360_0023_BH9UD5ADXX/Project_RM8391_RM8392/Sample_2D2/2D2_GTCCGC_L001_R1_001.fastq.gz	Illumina WGS	HG002	Benchmark PSVGT on short reads
HG002	ftp://ftp-trace.ncbi.nlm.nih.gov/ReferenceSamples/giab/data/AshkenazimTrio/HG002_NA24385_son/NIST_HiSeq_HG002_Homogeneity-10953946/HG002_HiSeq300x_fastq/140609_D00360_0023_BH9UD5ADXX/Project_RM8391_RM8392/Sample_2D2/2D2_GTCCGC_L001_R1_002.fastq.gz	Illumina WGS	HG002	Benchmark PSVGT on short reads
HG002	ftp://ftp-trace.ncbi.nlm.nih.gov/ReferenceSamples/giab/data/AshkenazimTrio/HG002_NA24385_son/NIST_HiSeq_HG002_Homogeneity-10953946/HG002_HiSeq300x_fastq/140609_D00360_0023_BH9UD5ADXX/Project_RM8391_RM8392/Sample_2D2/2D2_GTCCGC_L002_R1_001.fastq.gz	Illumina WGS	HG002	Benchmark PSVGT on short reads
HG002	ftp://ftp-trace.ncbi.nlm.nih.gov/ReferenceSamples/giab/data/AshkenazimTrio/HG002_NA24385_son/NIST_HiSeq_HG002_Homogeneity-10953946/HG002_HiSeq300x_fastq/140609_D00360_0023_BH9UD5ADXX/Project_RM8391_RM8392/Sample_2D2/2D2_GTCCGC_L002_R1_002.fastq.gz	Illumina WGS	HG002	Benchmark PSVGT on short reads
HG002	ftp://ftp-trace.ncbi.nlm.nih.gov/ReferenceSamples/giab/data/AshkenazimTrio/HG002_NA24385_son/NIST_HiSeq_HG002_Homogeneity-10953946/HG002_HiSeq300x_fastq/140609_D00360_0023_BH9UD5ADXX/Project_RM8391_RM8392/Sample_2F1/2F1_ACAGTG_L001_R1_001.fastq.gz	Illumina WGS	HG002	Benchmark PSVGT on short reads
HG002	ftp://ftp-trace.ncbi.nlm.nih.gov/ReferenceSamples/giab/data/AshkenazimTrio/HG002_NA24385_son/NIST_HiSeq_HG002_Homogeneity-10953946/HG002_HiSeq300x_fastq/140609_D00360_0023_BH9UD5ADXX/Project_RM8391_RM8392/Sample_2F1/2F1_ACAGTG_L001_R1_002.fastq.gz	Illumina WGS	HG002	Benchmark PSVGT on short reads
HG002	ftp://ftp-trace.ncbi.nlm.nih.gov/ReferenceSamples/giab/data/AshkenazimTrio/HG002_NA24385_son/NIST_HiSeq_HG002_Homogeneity-10953946/HG002_HiSeq300x_fastq/140609_D00360_0023_BH9UD5ADXX/Project_RM8391_RM8392/Sample_2F1/2F1_ACAGTG_L001_R1_003.fastq.gz	Illumina WGS	HG002	Benchmark PSVGT on short reads
HG002	ftp://ftp-trace.ncbi.nlm.nih.gov/ReferenceSamples/giab/data/AshkenazimTrio/HG002_NA24385_son/NIST_HiSeq_HG002_Homogeneity-10953946/HG002_HiSeq300x_fastq/140609_D00360_0023_BH9UD5ADXX/Project_RM8391_RM8392/Sample_2F1/2F1_ACAGTG_L001_R1_004.fastq.gz	Illumina WGS	HG002	Benchmark PSVGT on short reads
HG002	ftp://ftp-trace.ncbi.nlm.nih.gov/ReferenceSamples/giab/data/AshkenazimTrio/HG002_NA24385_son/NIST_HiSeq_HG002_Homogeneity-10953946/HG002_HiSeq300x_fastq/140609_D00360_0023_BH9UD5ADXX/Project_RM8391_RM8392/Sample_2F1/2F1_ACAGTG_L001_R1_005.fastq.gz	Illumina WGS	HG002	Benchmark PSVGT on short reads
HG002	ftp://ftp-trace.ncbi.nlm.nih.gov/ReferenceSamples/giab/data/AshkenazimTrio/HG002_NA24385_son/NIST_HiSeq_HG002_Homogeneity-10953946/HG002_HiSeq300x_fastq/140609_D00360_0023_BH9UD5ADXX/Project_RM8391_RM8392/Sample_2F1/2F1_ACAGTG_L001_R1_006.fastq.gz	Illumina WGS	HG002	Benchmark PSVGT on short reads
HG002	ftp://ftp-trace.ncbi.nlm.nih.gov/ReferenceSamples/giab/data/AshkenazimTrio/HG002_NA24385_son/NIST_HiSeq_HG002_Homogeneity-10953946/HG002_HiSeq300x_fastq/140609_D00360_0023_BH9UD5ADXX/Project_RM8391_RM8392/Sample_2F1/2F1_ACAGTG_L002_R1_001.fastq.gz	Illumina WGS	HG002	Benchmark PSVGT on short reads
HG002	ftp://ftp-trace.ncbi.nlm.nih.gov/ReferenceSamples/giab/data/AshkenazimTrio/HG002_NA24385_son/NIST_HiSeq_HG002_Homogeneity-10953946/HG002_HiSeq300x_fastq/140609_D00360_0023_BH9UD5ADXX/Project_RM8391_RM8392/Sample_2F1/2F1_ACAGTG_L002_R1_002.fastq.gz	Illumina WGS	HG002	Benchmark PSVGT on short reads
HG002	ftp://ftp-trace.ncbi.nlm.nih.gov/ReferenceSamples/giab/data/AshkenazimTrio/HG002_NA24385_son/NIST_HiSeq_HG002_Homogeneity-10953946/HG002_HiSeq300x_fastq/140609_D00360_0023_BH9UD5ADXX/Project_RM8391_RM8392/Sample_2F1/2F1_ACAGTG_L002_R1_003.fastq.gz	Illumina WGS	HG002	Benchmark PSVGT on short reads
HG002	ftp://ftp-trace.ncbi.nlm.nih.gov/ReferenceSamples/giab/data/AshkenazimTrio/HG002_NA24385_son/NIST_HiSeq_HG002_Homogeneity-10953946/HG002_HiSeq300x_fastq/140609_D00360_0023_BH9UD5ADXX/Project_RM8391_RM8392/Sample_2F1/2F1_ACAGTG_L002_R1_004.fastq.gz	Illumina WGS	HG002	Benchmark PSVGT on short reads
HG002	ftp://ftp-trace.ncbi.nlm.nih.gov/ReferenceSamples/giab/data/AshkenazimTrio/HG002_NA24385_son/NIST_HiSeq_HG002_Homogeneity-10953946/HG002_HiSeq300x_fastq/140609_D00360_0023_BH9UD5ADXX/Project_RM8391_RM8392/Sample_2F1/2F1_ACAGTG_L002_R1_005.fastq.gz	Illumina WGS	HG002	Benchmark PSVGT on short reads
HG002	ftp://ftp-trace.ncbi.nlm.nih.gov/ReferenceSamples/giab/data/AshkenazimTrio/HG002_NA24385_son/NIST_HiSeq_HG002_Homogeneity-10953946/HG002_HiSeq300x_fastq/140609_D00360_0023_BH9UD5ADXX/Project_RM8391_RM8392/Sample_2F1/2F1_ACAGTG_L002_R1_006.fastq.gz	Illumina WGS	HG002	Benchmark PSVGT on short reads
HG002	ftp://ftp-trace.ncbi.nlm.nih.gov/ReferenceSamples/giab/data/AshkenazimTrio/HG002_NA24385_son/NIST_HiSeq_HG002_Homogeneity-10953946/HG002_HiSeq300x_fastq/140609_D00360_0023_BH9UD5ADXX/Project_RM8391_RM8392/Sample_2F2/2F2_GCCAAT_L001_R1_001.fastq.gz	Illumina WGS	HG002	Benchmark PSVGT on short reads
HG002	ftp://ftp-trace.ncbi.nlm.nih.gov/ReferenceSamples/giab/data/AshkenazimTrio/HG002_NA24385_son/NIST_HiSeq_HG002_Homogeneity-10953946/HG002_HiSeq300x_fastq/140609_D00360_0023_BH9UD5ADXX/Project_RM8391_RM8392/Sample_2F2/2F2_GCCAAT_L001_R1_002.fastq.gz	Illumina WGS	HG002	Benchmark PSVGT on short reads
HG002	ftp://ftp-trace.ncbi.nlm.nih.gov/ReferenceSamples/giab/data/AshkenazimTrio/HG002_NA24385_son/NIST_HiSeq_HG002_Homogeneity-10953946/HG002_HiSeq300x_fastq/140609_D00360_0023_BH9UD5ADXX/Project_RM8391_RM8392/Sample_2F2/2F2_GCCAAT_L001_R1_003.fastq.gz	Illumina WGS	HG002	Benchmark PSVGT on short reads
HG002	ftp://ftp-trace.ncbi.nlm.nih.gov/ReferenceSamples/giab/data/AshkenazimTrio/HG002_NA24385_son/NIST_HiSeq_HG002_Homogeneity-10953946/HG002_HiSeq300x_fastq/140609_D00360_0023_BH9UD5ADXX/Project_RM8391_RM8392/Sample_2F2/2F2_GCCAAT_L001_R1_004.fastq.gz	Illumina WGS	HG002	Benchmark PSVGT on short reads
HG002	ftp://ftp-trace.ncbi.nlm.nih.gov/ReferenceSamples/giab/data/AshkenazimTrio/HG002_NA24385_son/NIST_HiSeq_HG002_Homogeneity-10953946/HG002_HiSeq300x_fastq/140609_D00360_0023_BH9UD5ADXX/Project_RM8391_RM8392/Sample_2F2/2F2_GCCAAT_L001_R1_005.fastq.gz	Illumina WGS	HG002	Benchmark PSVGT on short reads
HG002	ftp://ftp-trace.ncbi.nlm.nih.gov/ReferenceSamples/giab/data/AshkenazimTrio/HG002_NA24385_son/NIST_HiSeq_HG002_Homogeneity-10953946/HG002_HiSeq300x_fastq/140609_D00360_0023_BH9UD5ADXX/Project_RM8391_RM8392/Sample_2F2/2F2_GCCAAT_L001_R1_006.fastq.gz	Illumina WGS	HG002	Benchmark PSVGT on short reads
HG002	ftp://ftp-trace.ncbi.nlm.nih.gov/ReferenceSamples/giab/data/AshkenazimTrio/HG002_NA24385_son/NIST_HiSeq_HG002_Homogeneity-10953946/HG002_HiSeq300x_fastq/140609_D00360_0023_BH9UD5ADXX/Project_RM8391_RM8392/Sample_2F2/2F2_GCCAAT_L002_R1_001.fastq.gz	Illumina WGS	HG002	Benchmark PSVGT on short reads
HG002	ftp://ftp-trace.ncbi.nlm.nih.gov/ReferenceSamples/giab/data/AshkenazimTrio/HG002_NA24385_son/NIST_HiSeq_HG002_Homogeneity-10953946/HG002_HiSeq300x_fastq/140609_D00360_0023_BH9UD5ADXX/Project_RM8391_RM8392/Sample_2F2/2F2_GCCAAT_L002_R1_002.fastq.gz	Illumina WGS	HG002	Benchmark PSVGT on short reads
HG002	ftp://ftp-trace.ncbi.nlm.nih.gov/ReferenceSamples/giab/data/AshkenazimTrio/HG002_NA24385_son/NIST_HiSeq_HG002_Homogeneity-10953946/HG002_HiSeq300x_fastq/140609_D00360_0023_BH9UD5ADXX/Project_RM8391_RM8392/Sample_2F2/2F2_GCCAAT_L002_R1_003.fastq.gz	Illumina WGS	HG002	Benchmark PSVGT on short reads
HG002	ftp://ftp-trace.ncbi.nlm.nih.gov/ReferenceSamples/giab/data/AshkenazimTrio/HG002_NA24385_son/NIST_HiSeq_HG002_Homogeneity-10953946/HG002_HiSeq300x_fastq/140609_D00360_0023_BH9UD5ADXX/Project_RM8391_RM8392/Sample_2F2/2F2_GCCAAT_L002_R1_004.fastq.gz	Illumina WGS	HG002	Benchmark PSVGT on short reads
HG002	ftp://ftp-trace.ncbi.nlm.nih.gov/ReferenceSamples/giab/data/AshkenazimTrio/HG002_NA24385_son/NIST_HiSeq_HG002_Homogeneity-10953946/HG002_HiSeq300x_fastq/140609_D00360_0023_BH9UD5ADXX/Project_RM8391_RM8392/Sample_2F2/2F2_GCCAAT_L002_R1_005.fastq.gz	Illumina WGS	HG002	Benchmark PSVGT on short reads
HG002	ftp://ftp-trace.ncbi.nlm.nih.gov/ReferenceSamples/giab/data/AshkenazimTrio/HG002_NA24385_son/NIST_HiSeq_HG002_Homogeneity-10953946/HG002_HiSeq300x_fastq/140609_D00360_0023_BH9UD5ADXX/Project_RM8391_RM8392/Sample_2F2/2F2_GCCAAT_L002_R1_006.fastq.gz	Illumina WGS	HG002	Benchmark PSVGT on short reads
HG002	ftp://ftp-trace.ncbi.nlm.nih.gov/ReferenceSamples/giab/data/AshkenazimTrio/HG002_NA24385_son/NIST_HiSeq_HG002_Homogeneity-10953946/HG002_HiSeq300x_fastq/140609_D00360_0023_BH9UD5ADXX/Project_RM8391_RM8392/Sample_2L1/2L1_CTTGTA_L001_R1_001.fastq.gz	Illumina WGS	HG002	Benchmark PSVGT on short reads
HG002	ftp://ftp-trace.ncbi.nlm.nih.gov/ReferenceSamples/giab/data/AshkenazimTrio/HG002_NA24385_son/NIST_HiSeq_HG002_Homogeneity-10953946/HG002_HiSeq300x_fastq/140609_D00360_0023_BH9UD5ADXX/Project_RM8391_RM8392/Sample_2L1/2L1_CTTGTA_L001_R1_002.fastq.gz	Illumina WGS	HG002	Benchmark PSVGT on short reads
HG002	ftp://ftp-trace.ncbi.nlm.nih.gov/ReferenceSamples/giab/data/AshkenazimTrio/HG002_NA24385_son/NIST_HiSeq_HG002_Homogeneity-10953946/HG002_HiSeq300x_fastq/140609_D00360_0023_BH9UD5ADXX/Project_RM8391_RM8392/Sample_2L1/2L1_CTTGTA_L001_R1_003.fastq.gz	Illumina WGS	HG002	Benchmark PSVGT on short reads
HG002	ftp://ftp-trace.ncbi.nlm.nih.gov/ReferenceSamples/giab/data/AshkenazimTrio/HG002_NA24385_son/NIST_HiSeq_HG002_Homogeneity-10953946/HG002_HiSeq300x_fastq/140609_D00360_0023_BH9UD5ADXX/Project_RM8391_RM8392/Sample_2L1/2L1_CTTGTA_L001_R1_004.fastq.gz	Illumina WGS	HG002	Benchmark PSVGT on short reads
HG002	ftp://ftp-trace.ncbi.nlm.nih.gov/ReferenceSamples/giab/data/AshkenazimTrio/HG002_NA24385_son/NIST_HiSeq_HG002_Homogeneity-10953946/HG002_HiSeq300x_fastq/140609_D00360_0023_BH9UD5ADXX/Project_RM8391_RM8392/Sample_2L1/2L1_CTTGTA_L001_R1_005.fastq.gz	Illumina WGS	HG002	Benchmark PSVGT on short reads
HG002	ftp://ftp-trace.ncbi.nlm.nih.gov/ReferenceSamples/giab/data/AshkenazimTrio/HG002_NA24385_son/NIST_HiSeq_HG002_Homogeneity-10953946/HG002_HiSeq300x_fastq/140609_D00360_0023_BH9UD5ADXX/Project_RM8391_RM8392/Sample_2L1/2L1_CTTGTA_L001_R1_006.fastq.gz	Illumina WGS	HG002	Benchmark PSVGT on short reads
HG002	ftp://ftp-trace.ncbi.nlm.nih.gov/ReferenceSamples/giab/data/AshkenazimTrio/HG002_NA24385_son/NIST_HiSeq_HG002_Homogeneity-10953946/HG002_HiSeq300x_fastq/140609_D00360_0023_BH9UD5ADXX/Project_RM8391_RM8392/Sample_2L1/2L1_CTTGTA_L002_R1_001.fastq.gz	Illumina WGS	HG002	Benchmark PSVGT on short reads
HG002	ftp://ftp-trace.ncbi.nlm.nih.gov/ReferenceSamples/giab/data/AshkenazimTrio/HG002_NA24385_son/NIST_HiSeq_HG002_Homogeneity-10953946/HG002_HiSeq300x_fastq/140609_D00360_0023_BH9UD5ADXX/Project_RM8391_RM8392/Sample_2L1/2L1_CTTGTA_L002_R1_002.fastq.gz	Illumina WGS	HG002	Benchmark PSVGT on short reads
HG002	ftp://ftp-trace.ncbi.nlm.nih.gov/ReferenceSamples/giab/data/AshkenazimTrio/HG002_NA24385_son/NIST_HiSeq_HG002_Homogeneity-10953946/HG002_HiSeq300x_fastq/140609_D00360_0023_BH9UD5ADXX/Project_RM8391_RM8392/Sample_2L1/2L1_CTTGTA_L002_R1_003.fastq.gz	Illumina WGS	HG002	Benchmark PSVGT on short reads
HG002	ftp://ftp-trace.ncbi.nlm.nih.gov/ReferenceSamples/giab/data/AshkenazimTrio/HG002_NA24385_son/NIST_HiSeq_HG002_Homogeneity-10953946/HG002_HiSeq300x_fastq/140609_D00360_0023_BH9UD5ADXX/Project_RM8391_RM8392/Sample_2L1/2L1_CTTGTA_L002_R1_004.fastq.gz	Illumina WGS	HG002	Benchmark PSVGT on short reads
HG002	ftp://ftp-trace.ncbi.nlm.nih.gov/ReferenceSamples/giab/data/AshkenazimTrio/HG002_NA24385_son/NIST_HiSeq_HG002_Homogeneity-10953946/HG002_HiSeq300x_fastq/140609_D00360_0023_BH9UD5ADXX/Project_RM8391_RM8392/Sample_2L1/2L1_CTTGTA_L002_R1_005.fastq.gz	Illumina WGS	HG002	Benchmark PSVGT on short reads
HG002	ftp://ftp-trace.ncbi.nlm.nih.gov/ReferenceSamples/giab/data/AshkenazimTrio/HG002_NA24385_son/NIST_HiSeq_HG002_Homogeneity-10953946/HG002_HiSeq300x_fastq/140609_D00360_0023_BH9UD5ADXX/Project_RM8391_RM8392/Sample_2L1/2L1_CTTGTA_L002_R1_006.fastq.gz	Illumina WGS	HG002	Benchmark PSVGT on short reads
HG002	ftp://ftp-trace.ncbi.nlm.nih.gov/ReferenceSamples/giab/data/AshkenazimTrio/HG002_NA24385_son/NIST_HiSeq_HG002_Homogeneity-10953946/HG002_HiSeq300x_fastq/140609_D00360_0023_BH9UD5ADXX/Project_RM8391_RM8392/Sample_2L2/2L2_GTGAAA_L001_R1_001.fastq.gz	Illumina WGS	HG002	Benchmark PSVGT on short reads
HG002	ftp://ftp-trace.ncbi.nlm.nih.gov/ReferenceSamples/giab/data/AshkenazimTrio/HG002_NA24385_son/NIST_HiSeq_HG002_Homogeneity-10953946/HG002_HiSeq300x_fastq/140609_D00360_0023_BH9UD5ADXX/Project_RM8391_RM8392/Sample_2L2/2L2_GTGAAA_L001_R1_002.fastq.gz	Illumina WGS	HG002	Benchmark PSVGT on short reads
HG002	ftp://ftp-trace.ncbi.nlm.nih.gov/ReferenceSamples/giab/data/AshkenazimTrio/HG002_NA24385_son/NIST_HiSeq_HG002_Homogeneity-10953946/HG002_HiSeq300x_fastq/140609_D00360_0023_BH9UD5ADXX/Project_RM8391_RM8392/Sample_2L2/2L2_GTGAAA_L001_R1_003.fastq.gz	Illumina WGS	HG002	Benchmark PSVGT on short reads
HG002	ftp://ftp-trace.ncbi.nlm.nih.gov/ReferenceSamples/giab/data/AshkenazimTrio/HG002_NA24385_son/NIST_HiSeq_HG002_Homogeneity-10953946/HG002_HiSeq300x_fastq/140609_D00360_0023_BH9UD5ADXX/Project_RM8391_RM8392/Sample_2L2/2L2_GTGAAA_L001_R1_004.fastq.gz	Illumina WGS	HG002	Benchmark PSVGT on short reads
HG002	ftp://ftp-trace.ncbi.nlm.nih.gov/ReferenceSamples/giab/data/AshkenazimTrio/HG002_NA24385_son/NIST_HiSeq_HG002_Homogeneity-10953946/HG002_HiSeq300x_fastq/140609_D00360_0023_BH9UD5ADXX/Project_RM8391_RM8392/Sample_2L2/2L2_GTGAAA_L001_R1_005.fastq.gz	Illumina WGS	HG002	Benchmark PSVGT on short reads
HG002	ftp://ftp-trace.ncbi.nlm.nih.gov/ReferenceSamples/giab/data/AshkenazimTrio/HG002_NA24385_son/NIST_HiSeq_HG002_Homogeneity-10953946/HG002_HiSeq300x_fastq/140609_D00360_0023_BH9UD5ADXX/Project_RM8391_RM8392/Sample_2L2/2L2_GTGAAA_L001_R1_006.fastq.gz	Illumina WGS	HG002	Benchmark PSVGT on short reads
HG002	ftp://ftp-trace.ncbi.nlm.nih.gov/ReferenceSamples/giab/data/AshkenazimTrio/HG002_NA24385_son/NIST_HiSeq_HG002_Homogeneity-10953946/HG002_HiSeq300x_fastq/140609_D00360_0023_BH9UD5ADXX/Project_RM8391_RM8392/Sample_2L2/2L2_GTGAAA_L002_R1_001.fastq.gz	Illumina WGS	HG002	Benchmark PSVGT on short reads
HG002	ftp://ftp-trace.ncbi.nlm.nih.gov/ReferenceSamples/giab/data/AshkenazimTrio/HG002_NA24385_son/NIST_HiSeq_HG002_Homogeneity-10953946/HG002_HiSeq300x_fastq/140609_D00360_0023_BH9UD5ADXX/Project_RM8391_RM8392/Sample_2L2/2L2_GTGAAA_L002_R1_002.fastq.gz	Illumina WGS	HG002	Benchmark PSVGT on short reads
HG002	ftp://ftp-trace.ncbi.nlm.nih.gov/ReferenceSamples/giab/data/AshkenazimTrio/HG002_NA24385_son/NIST_HiSeq_HG002_Homogeneity-10953946/HG002_HiSeq300x_fastq/140609_D00360_0023_BH9UD5ADXX/Project_RM8391_RM8392/Sample_2L2/2L2_GTGAAA_L002_R1_003.fastq.gz	Illumina WGS	HG002	Benchmark PSVGT on short reads
HG002	ftp://ftp-trace.ncbi.nlm.nih.gov/ReferenceSamples/giab/data/AshkenazimTrio/HG002_NA24385_son/NIST_HiSeq_HG002_Homogeneity-10953946/HG002_HiSeq300x_fastq/140609_D00360_0023_BH9UD5ADXX/Project_RM8391_RM8392/Sample_2L2/2L2_GTGAAA_L002_R1_004.fastq.gz	Illumina WGS	HG002	Benchmark PSVGT on short reads
HG002	ftp://ftp-trace.ncbi.nlm.nih.gov/ReferenceSamples/giab/data/AshkenazimTrio/HG002_NA24385_son/NIST_HiSeq_HG002_Homogeneity-10953946/HG002_HiSeq300x_fastq/140609_D00360_0023_BH9UD5ADXX/Project_RM8391_RM8392/Sample_2L2/2L2_GTGAAA_L002_R1_005.fastq.gz	Illumina WGS	HG002	Benchmark PSVGT on short reads
HG002	ftp://ftp-trace.ncbi.nlm.nih.gov/ReferenceSamples/giab/data/AshkenazimTrio/HG002_NA24385_son/NIST_HiSeq_HG002_Homogeneity-10953946/HG002_HiSeq300x_fastq/140609_D00360_0023_BH9UD5ADXX/Project_RM8391_RM8392/Sample_2L2/2L2_GTGAAA_L002_R1_006.fastq.gz	Illumina WGS	HG002	Benchmark PSVGT on short reads
HG002	ftp://ftp-trace.ncbi.nlm.nih.gov/ReferenceSamples/giab/data/AshkenazimTrio/HG002_NA24385_son/NIST_HiSeq_HG002_Homogeneity-10953946/HG002_HiSeq300x_fastq/140611_D00360_0024_AH9TKDADXX/Project_RM8391_RM8392/Sample_2A1/2A1_CGATGT_L001_R1_001.fastq.gz	Illumina WGS	HG002	Benchmark PSVGT on short reads
HG002	ftp://ftp-trace.ncbi.nlm.nih.gov/ReferenceSamples/giab/data/AshkenazimTrio/HG002_NA24385_son/NIST_HiSeq_HG002_Homogeneity-10953946/HG002_HiSeq300x_fastq/140611_D00360_0024_AH9TKDADXX/Project_RM8391_RM8392/Sample_2A1/2A1_CGATGT_L001_R1_002.fastq.gz	Illumina WGS	HG002	Benchmark PSVGT on short reads
HG002	ftp://ftp-trace.ncbi.nlm.nih.gov/ReferenceSamples/giab/data/AshkenazimTrio/HG002_NA24385_son/NIST_HiSeq_HG002_Homogeneity-10953946/HG002_HiSeq300x_fastq/140611_D00360_0024_AH9TKDADXX/Project_RM8391_RM8392/Sample_2A1/2A1_CGATGT_L002_R1_001.fastq.gz	Illumina WGS	HG002	Benchmark PSVGT on short reads
HG002	ftp://ftp-trace.ncbi.nlm.nih.gov/ReferenceSamples/giab/data/AshkenazimTrio/HG002_NA24385_son/NIST_HiSeq_HG002_Homogeneity-10953946/HG002_HiSeq300x_fastq/140611_D00360_0024_AH9TKDADXX/Project_RM8391_RM8392/Sample_2A1/2A1_CGATGT_L002_R1_002.fastq.gz	Illumina WGS	HG002	Benchmark PSVGT on short reads
HG002	ftp://ftp-trace.ncbi.nlm.nih.gov/ReferenceSamples/giab/data/AshkenazimTrio/HG002_NA24385_son/NIST_HiSeq_HG002_Homogeneity-10953946/HG002_HiSeq300x_fastq/140611_D00360_0024_AH9TKDADXX/Project_RM8391_RM8392/Sample_2A2/2A2_TGACCA_L001_R1_001.fastq.gz	Illumina WGS	HG002	Benchmark PSVGT on short reads
HG002	ftp://ftp-trace.ncbi.nlm.nih.gov/ReferenceSamples/giab/data/AshkenazimTrio/HG002_NA24385_son/NIST_HiSeq_HG002_Homogeneity-10953946/HG002_HiSeq300x_fastq/140611_D00360_0024_AH9TKDADXX/Project_RM8391_RM8392/Sample_2A2/2A2_TGACCA_L001_R1_002.fastq.gz	Illumina WGS	HG002	Benchmark PSVGT on short reads
HG002	ftp://ftp-trace.ncbi.nlm.nih.gov/ReferenceSamples/giab/data/AshkenazimTrio/HG002_NA24385_son/NIST_HiSeq_HG002_Homogeneity-10953946/HG002_HiSeq300x_fastq/140611_D00360_0024_AH9TKDADXX/Project_RM8391_RM8392/Sample_2A2/2A2_TGACCA_L002_R1_001.fastq.gz	Illumina WGS	HG002	Benchmark PSVGT on short reads
HG002	ftp://ftp-trace.ncbi.nlm.nih.gov/ReferenceSamples/giab/data/AshkenazimTrio/HG002_NA24385_son/NIST_HiSeq_HG002_Homogeneity-10953946/HG002_HiSeq300x_fastq/140611_D00360_0024_AH9TKDADXX/Project_RM8391_RM8392/Sample_2A2/2A2_TGACCA_L002_R1_002.fastq.gz	Illumina WGS	HG002	Benchmark PSVGT on short reads
HG002	ftp://ftp-trace.ncbi.nlm.nih.gov/ReferenceSamples/giab/data/AshkenazimTrio/HG002_NA24385_son/NIST_HiSeq_HG002_Homogeneity-10953946/HG002_HiSeq300x_fastq/140611_D00360_0024_AH9TKDADXX/Project_RM8391_RM8392/Sample_2B1/2B1_CAGATC_L001_R1_001.fastq.gz	Illumina WGS	HG002	Benchmark PSVGT on short reads
HG002	ftp://ftp-trace.ncbi.nlm.nih.gov/ReferenceSamples/giab/data/AshkenazimTrio/HG002_NA24385_son/NIST_HiSeq_HG002_Homogeneity-10953946/HG002_HiSeq300x_fastq/140611_D00360_0024_AH9TKDADXX/Project_RM8391_RM8392/Sample_2B1/2B1_CAGATC_L001_R1_002.fastq.gz	Illumina WGS	HG002	Benchmark PSVGT on short reads
HG002	ftp://ftp-trace.ncbi.nlm.nih.gov/ReferenceSamples/giab/data/AshkenazimTrio/HG002_NA24385_son/NIST_HiSeq_HG002_Homogeneity-10953946/HG002_HiSeq300x_fastq/140611_D00360_0024_AH9TKDADXX/Project_RM8391_RM8392/Sample_2B1/2B1_CAGATC_L002_R1_001.fastq.gz	Illumina WGS	HG002	Benchmark PSVGT on short reads
HG002	ftp://ftp-trace.ncbi.nlm.nih.gov/ReferenceSamples/giab/data/AshkenazimTrio/HG002_NA24385_son/NIST_HiSeq_HG002_Homogeneity-10953946/HG002_HiSeq300x_fastq/140611_D00360_0024_AH9TKDADXX/Project_RM8391_RM8392/Sample_2B1/2B1_CAGATC_L002_R1_002.fastq.gz	Illumina WGS	HG002	Benchmark PSVGT on short reads
HG002	ftp://ftp-trace.ncbi.nlm.nih.gov/ReferenceSamples/giab/data/AshkenazimTrio/HG002_NA24385_son/NIST_HiSeq_HG002_Homogeneity-10953946/HG002_HiSeq300x_fastq/140611_D00360_0024_AH9TKDADXX/Project_RM8391_RM8392/Sample_2B2/2B2_CCGTCC_L001_R1_001.fastq.gz	Illumina WGS	HG002	Benchmark PSVGT on short reads
HG002	ftp://ftp-trace.ncbi.nlm.nih.gov/ReferenceSamples/giab/data/AshkenazimTrio/HG002_NA24385_son/NIST_HiSeq_HG002_Homogeneity-10953946/HG002_HiSeq300x_fastq/140611_D00360_0024_AH9TKDADXX/Project_RM8391_RM8392/Sample_2B2/2B2_CCGTCC_L001_R1_002.fastq.gz	Illumina WGS	HG002	Benchmark PSVGT on short reads
HG002	ftp://ftp-trace.ncbi.nlm.nih.gov/ReferenceSamples/giab/data/AshkenazimTrio/HG002_NA24385_son/NIST_HiSeq_HG002_Homogeneity-10953946/HG002_HiSeq300x_fastq/140611_D00360_0024_AH9TKDADXX/Project_RM8391_RM8392/Sample_2B2/2B2_CCGTCC_L002_R1_001.fastq.gz	Illumina WGS	HG002	Benchmark PSVGT on short reads
HG002	ftp://ftp-trace.ncbi.nlm.nih.gov/ReferenceSamples/giab/data/AshkenazimTrio/HG002_NA24385_son/NIST_HiSeq_HG002_Homogeneity-10953946/HG002_HiSeq300x_fastq/140611_D00360_0024_AH9TKDADXX/Project_RM8391_RM8392/Sample_2B2/2B2_CCGTCC_L002_R1_002.fastq.gz	Illumina WGS	HG002	Benchmark PSVGT on short reads
HG002	ftp://ftp-trace.ncbi.nlm.nih.gov/ReferenceSamples/giab/data/AshkenazimTrio/HG002_NA24385_son/NIST_HiSeq_HG002_Homogeneity-10953946/HG002_HiSeq300x_fastq/140611_D00360_0024_AH9TKDADXX/Project_RM8391_RM8392/Sample_2C1/2C1_AGTCAA_L001_R1_001.fastq.gz	Illumina WGS	HG002	Benchmark PSVGT on short reads
HG002	ftp://ftp-trace.ncbi.nlm.nih.gov/ReferenceSamples/giab/data/AshkenazimTrio/HG002_NA24385_son/NIST_HiSeq_HG002_Homogeneity-10953946/HG002_HiSeq300x_fastq/140611_D00360_0024_AH9TKDADXX/Project_RM8391_RM8392/Sample_2C1/2C1_AGTCAA_L001_R1_002.fastq.gz	Illumina WGS	HG002	Benchmark PSVGT on short reads
HG002	ftp://ftp-trace.ncbi.nlm.nih.gov/ReferenceSamples/giab/data/AshkenazimTrio/HG002_NA24385_son/NIST_HiSeq_HG002_Homogeneity-10953946/HG002_HiSeq300x_fastq/140611_D00360_0024_AH9TKDADXX/Project_RM8391_RM8392/Sample_2C1/2C1_AGTCAA_L002_R1_001.fastq.gz	Illumina WGS	HG002	Benchmark PSVGT on short reads
HG002	ftp://ftp-trace.ncbi.nlm.nih.gov/ReferenceSamples/giab/data/AshkenazimTrio/HG002_NA24385_son/NIST_HiSeq_HG002_Homogeneity-10953946/HG002_HiSeq300x_fastq/140611_D00360_0024_AH9TKDADXX/Project_RM8391_RM8392/Sample_2C1/2C1_AGTCAA_L002_R1_002.fastq.gz	Illumina WGS	HG002	Benchmark PSVGT on short reads
HG002	ftp://ftp-trace.ncbi.nlm.nih.gov/ReferenceSamples/giab/data/AshkenazimTrio/HG002_NA24385_son/NIST_HiSeq_HG002_Homogeneity-10953946/HG002_HiSeq300x_fastq/140611_D00360_0024_AH9TKDADXX/Project_RM8391_RM8392/Sample_2C2/2C2_AGTTCC_L001_R1_001.fastq.gz	Illumina WGS	HG002	Benchmark PSVGT on short reads
HG002	ftp://ftp-trace.ncbi.nlm.nih.gov/ReferenceSamples/giab/data/AshkenazimTrio/HG002_NA24385_son/NIST_HiSeq_HG002_Homogeneity-10953946/HG002_HiSeq300x_fastq/140611_D00360_0024_AH9TKDADXX/Project_RM8391_RM8392/Sample_2C2/2C2_AGTTCC_L001_R1_002.fastq.gz	Illumina WGS	HG002	Benchmark PSVGT on short reads
HG002	ftp://ftp-trace.ncbi.nlm.nih.gov/ReferenceSamples/giab/data/AshkenazimTrio/HG002_NA24385_son/NIST_HiSeq_HG002_Homogeneity-10953946/HG002_HiSeq300x_fastq/140611_D00360_0024_AH9TKDADXX/Project_RM8391_RM8392/Sample_2C2/2C2_AGTTCC_L002_R1_001.fastq.gz	Illumina WGS	HG002	Benchmark PSVGT on short reads
HG002	ftp://ftp-trace.ncbi.nlm.nih.gov/ReferenceSamples/giab/data/AshkenazimTrio/HG002_NA24385_son/NIST_HiSeq_HG002_Homogeneity-10953946/HG002_HiSeq300x_fastq/140611_D00360_0024_AH9TKDADXX/Project_RM8391_RM8392/Sample_2C2/2C2_AGTTCC_L002_R1_002.fastq.gz	Illumina WGS	HG002	Benchmark PSVGT on short reads
HG002	ftp://ftp-trace.ncbi.nlm.nih.gov/ReferenceSamples/giab/data/AshkenazimTrio/HG002_NA24385_son/NIST_HiSeq_HG002_Homogeneity-10953946/HG002_HiSeq300x_fastq/140611_D00360_0024_AH9TKDADXX/Project_RM8391_RM8392/Sample_2D1/2D1_ATGTCA_L001_R1_001.fastq.gz	Illumina WGS	HG002	Benchmark PSVGT on short reads
HG002	ftp://ftp-trace.ncbi.nlm.nih.gov/ReferenceSamples/giab/data/AshkenazimTrio/HG002_NA24385_son/NIST_HiSeq_HG002_Homogeneity-10953946/HG002_HiSeq300x_fastq/140611_D00360_0024_AH9TKDADXX/Project_RM8391_RM8392/Sample_2D1/2D1_ATGTCA_L001_R1_002.fastq.gz	Illumina WGS	HG002	Benchmark PSVGT on short reads
HG002	ftp://ftp-trace.ncbi.nlm.nih.gov/ReferenceSamples/giab/data/AshkenazimTrio/HG002_NA24385_son/NIST_HiSeq_HG002_Homogeneity-10953946/HG002_HiSeq300x_fastq/140611_D00360_0024_AH9TKDADXX/Project_RM8391_RM8392/Sample_2D1/2D1_ATGTCA_L002_R1_001.fastq.gz	Illumina WGS	HG002	Benchmark PSVGT on short reads
HG002	ftp://ftp-trace.ncbi.nlm.nih.gov/ReferenceSamples/giab/data/AshkenazimTrio/HG002_NA24385_son/NIST_HiSeq_HG002_Homogeneity-10953946/HG002_HiSeq300x_fastq/140611_D00360_0024_AH9TKDADXX/Project_RM8391_RM8392/Sample_2D1/2D1_ATGTCA_L002_R1_002.fastq.gz	Illumina WGS	HG002	Benchmark PSVGT on short reads
HG002	ftp://ftp-trace.ncbi.nlm.nih.gov/ReferenceSamples/giab/data/AshkenazimTrio/HG002_NA24385_son/NIST_HiSeq_HG002_Homogeneity-10953946/HG002_HiSeq300x_fastq/140611_D00360_0024_AH9TKDADXX/Project_RM8391_RM8392/Sample_2D2/2D2_GTCCGC_L001_R1_001.fastq.gz	Illumina WGS	HG002	Benchmark PSVGT on short reads
HG002	ftp://ftp-trace.ncbi.nlm.nih.gov/ReferenceSamples/giab/data/AshkenazimTrio/HG002_NA24385_son/NIST_HiSeq_HG002_Homogeneity-10953946/HG002_HiSeq300x_fastq/140611_D00360_0024_AH9TKDADXX/Project_RM8391_RM8392/Sample_2D2/2D2_GTCCGC_L001_R1_002.fastq.gz	Illumina WGS	HG002	Benchmark PSVGT on short reads
HG002	ftp://ftp-trace.ncbi.nlm.nih.gov/ReferenceSamples/giab/data/AshkenazimTrio/HG002_NA24385_son/NIST_HiSeq_HG002_Homogeneity-10953946/HG002_HiSeq300x_fastq/140611_D00360_0024_AH9TKDADXX/Project_RM8391_RM8392/Sample_2D2/2D2_GTCCGC_L002_R1_001.fastq.gz	Illumina WGS	HG002	Benchmark PSVGT on short reads
HG002	ftp://ftp-trace.ncbi.nlm.nih.gov/ReferenceSamples/giab/data/AshkenazimTrio/HG002_NA24385_son/NIST_HiSeq_HG002_Homogeneity-10953946/HG002_HiSeq300x_fastq/140611_D00360_0024_AH9TKDADXX/Project_RM8391_RM8392/Sample_2D2/2D2_GTCCGC_L002_R1_002.fastq.gz	Illumina WGS	HG002	Benchmark PSVGT on short reads
HG002	ftp://ftp-trace.ncbi.nlm.nih.gov/ReferenceSamples/giab/data/AshkenazimTrio/HG002_NA24385_son/NIST_HiSeq_HG002_Homogeneity-10953946/HG002_HiSeq300x_fastq/140611_D00360_0024_AH9TKDADXX/Project_RM8391_RM8392/Sample_2F1/2F1_ACAGTG_L001_R1_001.fastq.gz	Illumina WGS	HG002	Benchmark PSVGT on short reads
HG002	ftp://ftp-trace.ncbi.nlm.nih.gov/ReferenceSamples/giab/data/AshkenazimTrio/HG002_NA24385_son/NIST_HiSeq_HG002_Homogeneity-10953946/HG002_HiSeq300x_fastq/140611_D00360_0024_AH9TKDADXX/Project_RM8391_RM8392/Sample_2F1/2F1_ACAGTG_L001_R1_002.fastq.gz	Illumina WGS	HG002	Benchmark PSVGT on short reads
HG002	ftp://ftp-trace.ncbi.nlm.nih.gov/ReferenceSamples/giab/data/AshkenazimTrio/HG002_NA24385_son/NIST_HiSeq_HG002_Homogeneity-10953946/HG002_HiSeq300x_fastq/140611_D00360_0024_AH9TKDADXX/Project_RM8391_RM8392/Sample_2F1/2F1_ACAGTG_L001_R1_003.fastq.gz	Illumina WGS	HG002	Benchmark PSVGT on short reads
HG002	ftp://ftp-trace.ncbi.nlm.nih.gov/ReferenceSamples/giab/data/AshkenazimTrio/HG002_NA24385_son/NIST_HiSeq_HG002_Homogeneity-10953946/HG002_HiSeq300x_fastq/140611_D00360_0024_AH9TKDADXX/Project_RM8391_RM8392/Sample_2F1/2F1_ACAGTG_L001_R1_004.fastq.gz	Illumina WGS	HG002	Benchmark PSVGT on short reads
HG002	ftp://ftp-trace.ncbi.nlm.nih.gov/ReferenceSamples/giab/data/AshkenazimTrio/HG002_NA24385_son/NIST_HiSeq_HG002_Homogeneity-10953946/HG002_HiSeq300x_fastq/140611_D00360_0024_AH9TKDADXX/Project_RM8391_RM8392/Sample_2F1/2F1_ACAGTG_L001_R1_005.fastq.gz	Illumina WGS	HG002	Benchmark PSVGT on short reads
HG002	ftp://ftp-trace.ncbi.nlm.nih.gov/ReferenceSamples/giab/data/AshkenazimTrio/HG002_NA24385_son/NIST_HiSeq_HG002_Homogeneity-10953946/HG002_HiSeq300x_fastq/140611_D00360_0024_AH9TKDADXX/Project_RM8391_RM8392/Sample_2F1/2F1_ACAGTG_L001_R1_006.fastq.gz	Illumina WGS	HG002	Benchmark PSVGT on short reads
HG002	ftp://ftp-trace.ncbi.nlm.nih.gov/ReferenceSamples/giab/data/AshkenazimTrio/HG002_NA24385_son/NIST_HiSeq_HG002_Homogeneity-10953946/HG002_HiSeq300x_fastq/140611_D00360_0024_AH9TKDADXX/Project_RM8391_RM8392/Sample_2F1/2F1_ACAGTG_L002_R1_001.fastq.gz	Illumina WGS	HG002	Benchmark PSVGT on short reads
HG002	ftp://ftp-trace.ncbi.nlm.nih.gov/ReferenceSamples/giab/data/AshkenazimTrio/HG002_NA24385_son/NIST_HiSeq_HG002_Homogeneity-10953946/HG002_HiSeq300x_fastq/140611_D00360_0024_AH9TKDADXX/Project_RM8391_RM8392/Sample_2F1/2F1_ACAGTG_L002_R1_002.fastq.gz	Illumina WGS	HG002	Benchmark PSVGT on short reads
HG002	ftp://ftp-trace.ncbi.nlm.nih.gov/ReferenceSamples/giab/data/AshkenazimTrio/HG002_NA24385_son/NIST_HiSeq_HG002_Homogeneity-10953946/HG002_HiSeq300x_fastq/140611_D00360_0024_AH9TKDADXX/Project_RM8391_RM8392/Sample_2F1/2F1_ACAGTG_L002_R1_003.fastq.gz	Illumina WGS	HG002	Benchmark PSVGT on short reads
HG002	ftp://ftp-trace.ncbi.nlm.nih.gov/ReferenceSamples/giab/data/AshkenazimTrio/HG002_NA24385_son/NIST_HiSeq_HG002_Homogeneity-10953946/HG002_HiSeq300x_fastq/140611_D00360_0024_AH9TKDADXX/Project_RM8391_RM8392/Sample_2F1/2F1_ACAGTG_L002_R1_004.fastq.gz	Illumina WGS	HG002	Benchmark PSVGT on short reads
HG002	ftp://ftp-trace.ncbi.nlm.nih.gov/ReferenceSamples/giab/data/AshkenazimTrio/HG002_NA24385_son/NIST_HiSeq_HG002_Homogeneity-10953946/HG002_HiSeq300x_fastq/140611_D00360_0024_AH9TKDADXX/Project_RM8391_RM8392/Sample_2F1/2F1_ACAGTG_L002_R1_005.fastq.gz	Illumina WGS	HG002	Benchmark PSVGT on short reads
HG002	ftp://ftp-trace.ncbi.nlm.nih.gov/ReferenceSamples/giab/data/AshkenazimTrio/HG002_NA24385_son/NIST_HiSeq_HG002_Homogeneity-10953946/HG002_HiSeq300x_fastq/140611_D00360_0024_AH9TKDADXX/Project_RM8391_RM8392/Sample_2F1/2F1_ACAGTG_L002_R1_006.fastq.gz	Illumina WGS	HG002	Benchmark PSVGT on short reads
HG002	ftp://ftp-trace.ncbi.nlm.nih.gov/ReferenceSamples/giab/data/AshkenazimTrio/HG002_NA24385_son/NIST_HiSeq_HG002_Homogeneity-10953946/HG002_HiSeq300x_fastq/140611_D00360_0024_AH9TKDADXX/Project_RM8391_RM8392/Sample_2F2/2F2_GCCAAT_L001_R1_001.fastq.gz	Illumina WGS	HG002	Benchmark PSVGT on short reads
HG002	ftp://ftp-trace.ncbi.nlm.nih.gov/ReferenceSamples/giab/data/AshkenazimTrio/HG002_NA24385_son/NIST_HiSeq_HG002_Homogeneity-10953946/HG002_HiSeq300x_fastq/140611_D00360_0024_AH9TKDADXX/Project_RM8391_RM8392/Sample_2F2/2F2_GCCAAT_L001_R1_002.fastq.gz	Illumina WGS	HG002	Benchmark PSVGT on short reads
HG002	ftp://ftp-trace.ncbi.nlm.nih.gov/ReferenceSamples/giab/data/AshkenazimTrio/HG002_NA24385_son/NIST_HiSeq_HG002_Homogeneity-10953946/HG002_HiSeq300x_fastq/140611_D00360_0024_AH9TKDADXX/Project_RM8391_RM8392/Sample_2F2/2F2_GCCAAT_L001_R1_003.fastq.gz	Illumina WGS	HG002	Benchmark PSVGT on short reads
HG002	ftp://ftp-trace.ncbi.nlm.nih.gov/ReferenceSamples/giab/data/AshkenazimTrio/HG002_NA24385_son/NIST_HiSeq_HG002_Homogeneity-10953946/HG002_HiSeq300x_fastq/140611_D00360_0024_AH9TKDADXX/Project_RM8391_RM8392/Sample_2F2/2F2_GCCAAT_L001_R1_004.fastq.gz	Illumina WGS	HG002	Benchmark PSVGT on short reads
HG002	ftp://ftp-trace.ncbi.nlm.nih.gov/ReferenceSamples/giab/data/AshkenazimTrio/HG002_NA24385_son/NIST_HiSeq_HG002_Homogeneity-10953946/HG002_HiSeq300x_fastq/140611_D00360_0024_AH9TKDADXX/Project_RM8391_RM8392/Sample_2F2/2F2_GCCAAT_L001_R1_005.fastq.gz	Illumina WGS	HG002	Benchmark PSVGT on short reads
HG002	ftp://ftp-trace.ncbi.nlm.nih.gov/ReferenceSamples/giab/data/AshkenazimTrio/HG002_NA24385_son/NIST_HiSeq_HG002_Homogeneity-10953946/HG002_HiSeq300x_fastq/140611_D00360_0024_AH9TKDADXX/Project_RM8391_RM8392/Sample_2F2/2F2_GCCAAT_L001_R1_006.fastq.gz	Illumina WGS	HG002	Benchmark PSVGT on short reads
HG002	ftp://ftp-trace.ncbi.nlm.nih.gov/ReferenceSamples/giab/data/AshkenazimTrio/HG002_NA24385_son/NIST_HiSeq_HG002_Homogeneity-10953946/HG002_HiSeq300x_fastq/140611_D00360_0024_AH9TKDADXX/Project_RM8391_RM8392/Sample_2F2/2F2_GCCAAT_L002_R1_001.fastq.gz	Illumina WGS	HG002	Benchmark PSVGT on short reads
HG002	ftp://ftp-trace.ncbi.nlm.nih.gov/ReferenceSamples/giab/data/AshkenazimTrio/HG002_NA24385_son/NIST_HiSeq_HG002_Homogeneity-10953946/HG002_HiSeq300x_fastq/140611_D00360_0024_AH9TKDADXX/Project_RM8391_RM8392/Sample_2F2/2F2_GCCAAT_L002_R1_002.fastq.gz	Illumina WGS	HG002	Benchmark PSVGT on short reads
HG002	ftp://ftp-trace.ncbi.nlm.nih.gov/ReferenceSamples/giab/data/AshkenazimTrio/HG002_NA24385_son/NIST_HiSeq_HG002_Homogeneity-10953946/HG002_HiSeq300x_fastq/140611_D00360_0024_AH9TKDADXX/Project_RM8391_RM8392/Sample_2F2/2F2_GCCAAT_L002_R1_003.fastq.gz	Illumina WGS	HG002	Benchmark PSVGT on short reads
HG002	ftp://ftp-trace.ncbi.nlm.nih.gov/ReferenceSamples/giab/data/AshkenazimTrio/HG002_NA24385_son/NIST_HiSeq_HG002_Homogeneity-10953946/HG002_HiSeq300x_fastq/140611_D00360_0024_AH9TKDADXX/Project_RM8391_RM8392/Sample_2F2/2F2_GCCAAT_L002_R1_004.fastq.gz	Illumina WGS	HG002	Benchmark PSVGT on short reads
HG002	ftp://ftp-trace.ncbi.nlm.nih.gov/ReferenceSamples/giab/data/AshkenazimTrio/HG002_NA24385_son/NIST_HiSeq_HG002_Homogeneity-10953946/HG002_HiSeq300x_fastq/140611_D00360_0024_AH9TKDADXX/Project_RM8391_RM8392/Sample_2F2/2F2_GCCAAT_L002_R1_005.fastq.gz	Illumina WGS	HG002	Benchmark PSVGT on short reads
HG002	ftp://ftp-trace.ncbi.nlm.nih.gov/ReferenceSamples/giab/data/AshkenazimTrio/HG002_NA24385_son/NIST_HiSeq_HG002_Homogeneity-10953946/HG002_HiSeq300x_fastq/140611_D00360_0024_AH9TKDADXX/Project_RM8391_RM8392/Sample_2F2/2F2_GCCAAT_L002_R1_006.fastq.gz	Illumina WGS	HG002	Benchmark PSVGT on short reads
HG002	ftp://ftp-trace.ncbi.nlm.nih.gov/ReferenceSamples/giab/data/AshkenazimTrio/HG002_NA24385_son/NIST_HiSeq_HG002_Homogeneity-10953946/HG002_HiSeq300x_fastq/140611_D00360_0024_AH9TKDADXX/Project_RM8391_RM8392/Sample_2L1/2L1_CTTGTA_L001_R1_001.fastq.gz	Illumina WGS	HG002	Benchmark PSVGT on short reads
HG002	ftp://ftp-trace.ncbi.nlm.nih.gov/ReferenceSamples/giab/data/AshkenazimTrio/HG002_NA24385_son/NIST_HiSeq_HG002_Homogeneity-10953946/HG002_HiSeq300x_fastq/140611_D00360_0024_AH9TKDADXX/Project_RM8391_RM8392/Sample_2L1/2L1_CTTGTA_L001_R1_002.fastq.gz	Illumina WGS	HG002	Benchmark PSVGT on short reads
HG002	ftp://ftp-trace.ncbi.nlm.nih.gov/ReferenceSamples/giab/data/AshkenazimTrio/HG002_NA24385_son/NIST_HiSeq_HG002_Homogeneity-10953946/HG002_HiSeq300x_fastq/140611_D00360_0024_AH9TKDADXX/Project_RM8391_RM8392/Sample_2L1/2L1_CTTGTA_L001_R1_003.fastq.gz	Illumina WGS	HG002	Benchmark PSVGT on short reads
HG002	ftp://ftp-trace.ncbi.nlm.nih.gov/ReferenceSamples/giab/data/AshkenazimTrio/HG002_NA24385_son/NIST_HiSeq_HG002_Homogeneity-10953946/HG002_HiSeq300x_fastq/140611_D00360_0024_AH9TKDADXX/Project_RM8391_RM8392/Sample_2L1/2L1_CTTGTA_L001_R1_004.fastq.gz	Illumina WGS	HG002	Benchmark PSVGT on short reads
HG002	ftp://ftp-trace.ncbi.nlm.nih.gov/ReferenceSamples/giab/data/AshkenazimTrio/HG002_NA24385_son/NIST_HiSeq_HG002_Homogeneity-10953946/HG002_HiSeq300x_fastq/140611_D00360_0024_AH9TKDADXX/Project_RM8391_RM8392/Sample_2L1/2L1_CTTGTA_L001_R1_005.fastq.gz	Illumina WGS	HG002	Benchmark PSVGT on short reads
HG002	ftp://ftp-trace.ncbi.nlm.nih.gov/ReferenceSamples/giab/data/AshkenazimTrio/HG002_NA24385_son/NIST_HiSeq_HG002_Homogeneity-10953946/HG002_HiSeq300x_fastq/140611_D00360_0024_AH9TKDADXX/Project_RM8391_RM8392/Sample_2L1/2L1_CTTGTA_L001_R1_006.fastq.gz	Illumina WGS	HG002	Benchmark PSVGT on short reads
HG002	ftp://ftp-trace.ncbi.nlm.nih.gov/ReferenceSamples/giab/data/AshkenazimTrio/HG002_NA24385_son/NIST_HiSeq_HG002_Homogeneity-10953946/HG002_HiSeq300x_fastq/140611_D00360_0024_AH9TKDADXX/Project_RM8391_RM8392/Sample_2L1/2L1_CTTGTA_L002_R1_001.fastq.gz	Illumina WGS	HG002	Benchmark PSVGT on short reads
HG002	ftp://ftp-trace.ncbi.nlm.nih.gov/ReferenceSamples/giab/data/AshkenazimTrio/HG002_NA24385_son/NIST_HiSeq_HG002_Homogeneity-10953946/HG002_HiSeq300x_fastq/140611_D00360_0024_AH9TKDADXX/Project_RM8391_RM8392/Sample_2L1/2L1_CTTGTA_L002_R1_002.fastq.gz	Illumina WGS	HG002	Benchmark PSVGT on short reads
HG002	ftp://ftp-trace.ncbi.nlm.nih.gov/ReferenceSamples/giab/data/AshkenazimTrio/HG002_NA24385_son/NIST_HiSeq_HG002_Homogeneity-10953946/HG002_HiSeq300x_fastq/140611_D00360_0024_AH9TKDADXX/Project_RM8391_RM8392/Sample_2L1/2L1_CTTGTA_L002_R1_003.fastq.gz	Illumina WGS	HG002	Benchmark PSVGT on short reads
HG002	ftp://ftp-trace.ncbi.nlm.nih.gov/ReferenceSamples/giab/data/AshkenazimTrio/HG002_NA24385_son/NIST_HiSeq_HG002_Homogeneity-10953946/HG002_HiSeq300x_fastq/140611_D00360_0024_AH9TKDADXX/Project_RM8391_RM8392/Sample_2L1/2L1_CTTGTA_L002_R1_004.fastq.gz	Illumina WGS	HG002	Benchmark PSVGT on short reads
HG002	ftp://ftp-trace.ncbi.nlm.nih.gov/ReferenceSamples/giab/data/AshkenazimTrio/HG002_NA24385_son/NIST_HiSeq_HG002_Homogeneity-10953946/HG002_HiSeq300x_fastq/140611_D00360_0024_AH9TKDADXX/Project_RM8391_RM8392/Sample_2L1/2L1_CTTGTA_L002_R1_005.fastq.gz	Illumina WGS	HG002	Benchmark PSVGT on short reads
HG002	ftp://ftp-trace.ncbi.nlm.nih.gov/ReferenceSamples/giab/data/AshkenazimTrio/HG002_NA24385_son/NIST_HiSeq_HG002_Homogeneity-10953946/HG002_HiSeq300x_fastq/140611_D00360_0024_AH9TKDADXX/Project_RM8391_RM8392/Sample_2L1/2L1_CTTGTA_L002_R1_006.fastq.gz	Illumina WGS	HG002	Benchmark PSVGT on short reads
HG002	ftp://ftp-trace.ncbi.nlm.nih.gov/ReferenceSamples/giab/data/AshkenazimTrio/HG002_NA24385_son/NIST_HiSeq_HG002_Homogeneity-10953946/HG002_HiSeq300x_fastq/140611_D00360_0024_AH9TKDADXX/Project_RM8391_RM8392/Sample_2L2/2L2_GTGAAA_L001_R1_001.fastq.gz	Illumina WGS	HG002	Benchmark PSVGT on short reads
HG002	ftp://ftp-trace.ncbi.nlm.nih.gov/ReferenceSamples/giab/data/AshkenazimTrio/HG002_NA24385_son/NIST_HiSeq_HG002_Homogeneity-10953946/HG002_HiSeq300x_fastq/140611_D00360_0024_AH9TKDADXX/Project_RM8391_RM8392/Sample_2L2/2L2_GTGAAA_L001_R1_002.fastq.gz	Illumina WGS	HG002	Benchmark PSVGT on short reads
HG002	ftp://ftp-trace.ncbi.nlm.nih.gov/ReferenceSamples/giab/data/AshkenazimTrio/HG002_NA24385_son/NIST_HiSeq_HG002_Homogeneity-10953946/HG002_HiSeq300x_fastq/140611_D00360_0024_AH9TKDADXX/Project_RM8391_RM8392/Sample_2L2/2L2_GTGAAA_L001_R1_003.fastq.gz	Illumina WGS	HG002	Benchmark PSVGT on short reads
HG002	ftp://ftp-trace.ncbi.nlm.nih.gov/ReferenceSamples/giab/data/AshkenazimTrio/HG002_NA24385_son/NIST_HiSeq_HG002_Homogeneity-10953946/HG002_HiSeq300x_fastq/140611_D00360_0024_AH9TKDADXX/Project_RM8391_RM8392/Sample_2L2/2L2_GTGAAA_L001_R1_004.fastq.gz	Illumina WGS	HG002	Benchmark PSVGT on short reads
HG002	ftp://ftp-trace.ncbi.nlm.nih.gov/ReferenceSamples/giab/data/AshkenazimTrio/HG002_NA24385_son/NIST_HiSeq_HG002_Homogeneity-10953946/HG002_HiSeq300x_fastq/140611_D00360_0024_AH9TKDADXX/Project_RM8391_RM8392/Sample_2L2/2L2_GTGAAA_L001_R1_005.fastq.gz	Illumina WGS	HG002	Benchmark PSVGT on short reads
HG002	ftp://ftp-trace.ncbi.nlm.nih.gov/ReferenceSamples/giab/data/AshkenazimTrio/HG002_NA24385_son/NIST_HiSeq_HG002_Homogeneity-10953946/HG002_HiSeq300x_fastq/140611_D00360_0024_AH9TKDADXX/Project_RM8391_RM8392/Sample_2L2/2L2_GTGAAA_L001_R1_006.fastq.gz	Illumina WGS	HG002	Benchmark PSVGT on short reads
HG002	ftp://ftp-trace.ncbi.nlm.nih.gov/ReferenceSamples/giab/data/AshkenazimTrio/HG002_NA24385_son/NIST_HiSeq_HG002_Homogeneity-10953946/HG002_HiSeq300x_fastq/140611_D00360_0024_AH9TKDADXX/Project_RM8391_RM8392/Sample_2L2/2L2_GTGAAA_L002_R1_001.fastq.gz	Illumina WGS	HG002	Benchmark PSVGT on short reads
HG002	ftp://ftp-trace.ncbi.nlm.nih.gov/ReferenceSamples/giab/data/AshkenazimTrio/HG002_NA24385_son/NIST_HiSeq_HG002_Homogeneity-10953946/HG002_HiSeq300x_fastq/140611_D00360_0024_AH9TKDADXX/Project_RM8391_RM8392/Sample_2L2/2L2_GTGAAA_L002_R1_002.fastq.gz	Illumina WGS	HG002	Benchmark PSVGT on short reads
HG002	ftp://ftp-trace.ncbi.nlm.nih.gov/ReferenceSamples/giab/data/AshkenazimTrio/HG002_NA24385_son/NIST_HiSeq_HG002_Homogeneity-10953946/HG002_HiSeq300x_fastq/140611_D00360_0024_AH9TKDADXX/Project_RM8391_RM8392/Sample_2L2/2L2_GTGAAA_L002_R1_003.fastq.gz	Illumina WGS	HG002	Benchmark PSVGT on short reads
HG002	ftp://ftp-trace.ncbi.nlm.nih.gov/ReferenceSamples/giab/data/AshkenazimTrio/HG002_NA24385_son/NIST_HiSeq_HG002_Homogeneity-10953946/HG002_HiSeq300x_fastq/140611_D00360_0024_AH9TKDADXX/Project_RM8391_RM8392/Sample_2L2/2L2_GTGAAA_L002_R1_004.fastq.gz	Illumina WGS	HG002	Benchmark PSVGT on short reads
HG002	ftp://ftp-trace.ncbi.nlm.nih.gov/ReferenceSamples/giab/data/AshkenazimTrio/HG002_NA24385_son/NIST_HiSeq_HG002_Homogeneity-10953946/HG002_HiSeq300x_fastq/140611_D00360_0024_AH9TKDADXX/Project_RM8391_RM8392/Sample_2L2/2L2_GTGAAA_L002_R1_005.fastq.gz	Illumina WGS	HG002	Benchmark PSVGT on short reads
HG002	ftp://ftp-trace.ncbi.nlm.nih.gov/ReferenceSamples/giab/data/AshkenazimTrio/HG002_NA24385_son/NIST_HiSeq_HG002_Homogeneity-10953946/HG002_HiSeq300x_fastq/140611_D00360_0024_AH9TKDADXX/Project_RM8391_RM8392/Sample_2L2/2L2_GTGAAA_L002_R1_006.fastq.gz	Illumina WGS	HG002	Benchmark PSVGT on short reads
HG002	ftp://ftp-trace.ncbi.nlm.nih.gov/ReferenceSamples/giab/data/AshkenazimTrio/HG002_NA24385_son/NIST_HiSeq_HG002_Homogeneity-10953946/HG002_HiSeq300x_fastq/140611_D00360_0025_BH9UD6ADXX/Project_RM8391_RM8392/Sample_2A1/2A1_CGATGT_L001_R1_001.fastq.gz	Illumina WGS	HG002	Benchmark PSVGT on short reads
HG002	ftp://ftp-trace.ncbi.nlm.nih.gov/ReferenceSamples/giab/data/AshkenazimTrio/HG002_NA24385_son/NIST_HiSeq_HG002_Homogeneity-10953946/HG002_HiSeq300x_fastq/140611_D00360_0025_BH9UD6ADXX/Project_RM8391_RM8392/Sample_2A1/2A1_CGATGT_L001_R1_002.fastq.gz	Illumina WGS	HG002	Benchmark PSVGT on short reads
HG002	ftp://ftp-trace.ncbi.nlm.nih.gov/ReferenceSamples/giab/data/AshkenazimTrio/HG002_NA24385_son/NIST_HiSeq_HG002_Homogeneity-10953946/HG002_HiSeq300x_fastq/140611_D00360_0025_BH9UD6ADXX/Project_RM8391_RM8392/Sample_2A1/2A1_CGATGT_L002_R1_001.fastq.gz	Illumina WGS	HG002	Benchmark PSVGT on short reads
HG002	ftp://ftp-trace.ncbi.nlm.nih.gov/ReferenceSamples/giab/data/AshkenazimTrio/HG002_NA24385_son/NIST_HiSeq_HG002_Homogeneity-10953946/HG002_HiSeq300x_fastq/140611_D00360_0025_BH9UD6ADXX/Project_RM8391_RM8392/Sample_2A1/2A1_CGATGT_L002_R1_002.fastq.gz	Illumina WGS	HG002	Benchmark PSVGT on short reads
HG002	ftp://ftp-trace.ncbi.nlm.nih.gov/ReferenceSamples/giab/data/AshkenazimTrio/HG002_NA24385_son/NIST_HiSeq_HG002_Homogeneity-10953946/HG002_HiSeq300x_fastq/140611_D00360_0025_BH9UD6ADXX/Project_RM8391_RM8392/Sample_2A2/2A2_TGACCA_L001_R1_001.fastq.gz	Illumina WGS	HG002	Benchmark PSVGT on short reads
HG002	ftp://ftp-trace.ncbi.nlm.nih.gov/ReferenceSamples/giab/data/AshkenazimTrio/HG002_NA24385_son/NIST_HiSeq_HG002_Homogeneity-10953946/HG002_HiSeq300x_fastq/140611_D00360_0025_BH9UD6ADXX/Project_RM8391_RM8392/Sample_2A2/2A2_TGACCA_L001_R1_002.fastq.gz	Illumina WGS	HG002	Benchmark PSVGT on short reads
HG002	ftp://ftp-trace.ncbi.nlm.nih.gov/ReferenceSamples/giab/data/AshkenazimTrio/HG002_NA24385_son/NIST_HiSeq_HG002_Homogeneity-10953946/HG002_HiSeq300x_fastq/140611_D00360_0025_BH9UD6ADXX/Project_RM8391_RM8392/Sample_2A2/2A2_TGACCA_L002_R1_001.fastq.gz	Illumina WGS	HG002	Benchmark PSVGT on short reads
HG002	ftp://ftp-trace.ncbi.nlm.nih.gov/ReferenceSamples/giab/data/AshkenazimTrio/HG002_NA24385_son/NIST_HiSeq_HG002_Homogeneity-10953946/HG002_HiSeq300x_fastq/140611_D00360_0025_BH9UD6ADXX/Project_RM8391_RM8392/Sample_2A2/2A2_TGACCA_L002_R1_002.fastq.gz	Illumina WGS	HG002	Benchmark PSVGT on short reads
HG002	ftp://ftp-trace.ncbi.nlm.nih.gov/ReferenceSamples/giab/data/AshkenazimTrio/HG002_NA24385_son/NIST_HiSeq_HG002_Homogeneity-10953946/HG002_HiSeq300x_fastq/140611_D00360_0025_BH9UD6ADXX/Project_RM8391_RM8392/Sample_2B1/2B1_CAGATC_L001_R1_001.fastq.gz	Illumina WGS	HG002	Benchmark PSVGT on short reads
HG002	ftp://ftp-trace.ncbi.nlm.nih.gov/ReferenceSamples/giab/data/AshkenazimTrio/HG002_NA24385_son/NIST_HiSeq_HG002_Homogeneity-10953946/HG002_HiSeq300x_fastq/140611_D00360_0025_BH9UD6ADXX/Project_RM8391_RM8392/Sample_2B1/2B1_CAGATC_L001_R1_002.fastq.gz	Illumina WGS	HG002	Benchmark PSVGT on short reads
HG002	ftp://ftp-trace.ncbi.nlm.nih.gov/ReferenceSamples/giab/data/AshkenazimTrio/HG002_NA24385_son/NIST_HiSeq_HG002_Homogeneity-10953946/HG002_HiSeq300x_fastq/140611_D00360_0025_BH9UD6ADXX/Project_RM8391_RM8392/Sample_2B1/2B1_CAGATC_L002_R1_001.fastq.gz	Illumina WGS	HG002	Benchmark PSVGT on short reads
HG002	ftp://ftp-trace.ncbi.nlm.nih.gov/ReferenceSamples/giab/data/AshkenazimTrio/HG002_NA24385_son/NIST_HiSeq_HG002_Homogeneity-10953946/HG002_HiSeq300x_fastq/140611_D00360_0025_BH9UD6ADXX/Project_RM8391_RM8392/Sample_2B1/2B1_CAGATC_L002_R1_002.fastq.gz	Illumina WGS	HG002	Benchmark PSVGT on short reads
HG002	ftp://ftp-trace.ncbi.nlm.nih.gov/ReferenceSamples/giab/data/AshkenazimTrio/HG002_NA24385_son/NIST_HiSeq_HG002_Homogeneity-10953946/HG002_HiSeq300x_fastq/140611_D00360_0025_BH9UD6ADXX/Project_RM8391_RM8392/Sample_2B2/2B2_CCGTCC_L001_R1_001.fastq.gz	Illumina WGS	HG002	Benchmark PSVGT on short reads
HG002	ftp://ftp-trace.ncbi.nlm.nih.gov/ReferenceSamples/giab/data/AshkenazimTrio/HG002_NA24385_son/NIST_HiSeq_HG002_Homogeneity-10953946/HG002_HiSeq300x_fastq/140611_D00360_0025_BH9UD6ADXX/Project_RM8391_RM8392/Sample_2B2/2B2_CCGTCC_L001_R1_002.fastq.gz	Illumina WGS	HG002	Benchmark PSVGT on short reads
HG002	ftp://ftp-trace.ncbi.nlm.nih.gov/ReferenceSamples/giab/data/AshkenazimTrio/HG002_NA24385_son/NIST_HiSeq_HG002_Homogeneity-10953946/HG002_HiSeq300x_fastq/140611_D00360_0025_BH9UD6ADXX/Project_RM8391_RM8392/Sample_2B2/2B2_CCGTCC_L002_R1_001.fastq.gz	Illumina WGS	HG002	Benchmark PSVGT on short reads
HG002	ftp://ftp-trace.ncbi.nlm.nih.gov/ReferenceSamples/giab/data/AshkenazimTrio/HG002_NA24385_son/NIST_HiSeq_HG002_Homogeneity-10953946/HG002_HiSeq300x_fastq/140611_D00360_0025_BH9UD6ADXX/Project_RM8391_RM8392/Sample_2B2/2B2_CCGTCC_L002_R1_002.fastq.gz	Illumina WGS	HG002	Benchmark PSVGT on short reads
HG002	ftp://ftp-trace.ncbi.nlm.nih.gov/ReferenceSamples/giab/data/AshkenazimTrio/HG002_NA24385_son/NIST_HiSeq_HG002_Homogeneity-10953946/HG002_HiSeq300x_fastq/140611_D00360_0025_BH9UD6ADXX/Project_RM8391_RM8392/Sample_2C1/2C1_AGTCAA_L001_R1_001.fastq.gz	Illumina WGS	HG002	Benchmark PSVGT on short reads
HG002	ftp://ftp-trace.ncbi.nlm.nih.gov/ReferenceSamples/giab/data/AshkenazimTrio/HG002_NA24385_son/NIST_HiSeq_HG002_Homogeneity-10953946/HG002_HiSeq300x_fastq/140611_D00360_0025_BH9UD6ADXX/Project_RM8391_RM8392/Sample_2C1/2C1_AGTCAA_L001_R1_002.fastq.gz	Illumina WGS	HG002	Benchmark PSVGT on short reads
HG002	ftp://ftp-trace.ncbi.nlm.nih.gov/ReferenceSamples/giab/data/AshkenazimTrio/HG002_NA24385_son/NIST_HiSeq_HG002_Homogeneity-10953946/HG002_HiSeq300x_fastq/140611_D00360_0025_BH9UD6ADXX/Project_RM8391_RM8392/Sample_2C1/2C1_AGTCAA_L002_R1_001.fastq.gz	Illumina WGS	HG002	Benchmark PSVGT on short reads
HG002	ftp://ftp-trace.ncbi.nlm.nih.gov/ReferenceSamples/giab/data/AshkenazimTrio/HG002_NA24385_son/NIST_HiSeq_HG002_Homogeneity-10953946/HG002_HiSeq300x_fastq/140611_D00360_0025_BH9UD6ADXX/Project_RM8391_RM8392/Sample_2C1/2C1_AGTCAA_L002_R1_002.fastq.gz	Illumina WGS	HG002	Benchmark PSVGT on short reads
HG002	ftp://ftp-trace.ncbi.nlm.nih.gov/ReferenceSamples/giab/data/AshkenazimTrio/HG002_NA24385_son/NIST_HiSeq_HG002_Homogeneity-10953946/HG002_HiSeq300x_fastq/140611_D00360_0025_BH9UD6ADXX/Project_RM8391_RM8392/Sample_2C2/2C2_AGTTCC_L001_R1_001.fastq.gz	Illumina WGS	HG002	Benchmark PSVGT on short reads
HG002	ftp://ftp-trace.ncbi.nlm.nih.gov/ReferenceSamples/giab/data/AshkenazimTrio/HG002_NA24385_son/NIST_HiSeq_HG002_Homogeneity-10953946/HG002_HiSeq300x_fastq/140611_D00360_0025_BH9UD6ADXX/Project_RM8391_RM8392/Sample_2C2/2C2_AGTTCC_L001_R1_002.fastq.gz	Illumina WGS	HG002	Benchmark PSVGT on short reads
HG002	ftp://ftp-trace.ncbi.nlm.nih.gov/ReferenceSamples/giab/data/AshkenazimTrio/HG002_NA24385_son/NIST_HiSeq_HG002_Homogeneity-10953946/HG002_HiSeq300x_fastq/140611_D00360_0025_BH9UD6ADXX/Project_RM8391_RM8392/Sample_2C2/2C2_AGTTCC_L002_R1_001.fastq.gz	Illumina WGS	HG002	Benchmark PSVGT on short reads
HG002	ftp://ftp-trace.ncbi.nlm.nih.gov/ReferenceSamples/giab/data/AshkenazimTrio/HG002_NA24385_son/NIST_HiSeq_HG002_Homogeneity-10953946/HG002_HiSeq300x_fastq/140611_D00360_0025_BH9UD6ADXX/Project_RM8391_RM8392/Sample_2C2/2C2_AGTTCC_L002_R1_002.fastq.gz	Illumina WGS	HG002	Benchmark PSVGT on short reads
HG002	ftp://ftp-trace.ncbi.nlm.nih.gov/ReferenceSamples/giab/data/AshkenazimTrio/HG002_NA24385_son/NIST_HiSeq_HG002_Homogeneity-10953946/HG002_HiSeq300x_fastq/140611_D00360_0025_BH9UD6ADXX/Project_RM8391_RM8392/Sample_2D1/2D1_ATGTCA_L001_R1_001.fastq.gz	Illumina WGS	HG002	Benchmark PSVGT on short reads
HG002	ftp://ftp-trace.ncbi.nlm.nih.gov/ReferenceSamples/giab/data/AshkenazimTrio/HG002_NA24385_son/NIST_HiSeq_HG002_Homogeneity-10953946/HG002_HiSeq300x_fastq/140611_D00360_0025_BH9UD6ADXX/Project_RM8391_RM8392/Sample_2D1/2D1_ATGTCA_L001_R1_002.fastq.gz	Illumina WGS	HG002	Benchmark PSVGT on short reads
HG002	ftp://ftp-trace.ncbi.nlm.nih.gov/ReferenceSamples/giab/data/AshkenazimTrio/HG002_NA24385_son/NIST_HiSeq_HG002_Homogeneity-10953946/HG002_HiSeq300x_fastq/140611_D00360_0025_BH9UD6ADXX/Project_RM8391_RM8392/Sample_2D1/2D1_ATGTCA_L002_R1_001.fastq.gz	Illumina WGS	HG002	Benchmark PSVGT on short reads
HG002	ftp://ftp-trace.ncbi.nlm.nih.gov/ReferenceSamples/giab/data/AshkenazimTrio/HG002_NA24385_son/NIST_HiSeq_HG002_Homogeneity-10953946/HG002_HiSeq300x_fastq/140611_D00360_0025_BH9UD6ADXX/Project_RM8391_RM8392/Sample_2D1/2D1_ATGTCA_L002_R1_002.fastq.gz	Illumina WGS	HG002	Benchmark PSVGT on short reads
HG002	ftp://ftp-trace.ncbi.nlm.nih.gov/ReferenceSamples/giab/data/AshkenazimTrio/HG002_NA24385_son/NIST_HiSeq_HG002_Homogeneity-10953946/HG002_HiSeq300x_fastq/140611_D00360_0025_BH9UD6ADXX/Project_RM8391_RM8392/Sample_2D2/2D2_GTCCGC_L001_R1_001.fastq.gz	Illumina WGS	HG002	Benchmark PSVGT on short reads
HG002	ftp://ftp-trace.ncbi.nlm.nih.gov/ReferenceSamples/giab/data/AshkenazimTrio/HG002_NA24385_son/NIST_HiSeq_HG002_Homogeneity-10953946/HG002_HiSeq300x_fastq/140611_D00360_0025_BH9UD6ADXX/Project_RM8391_RM8392/Sample_2D2/2D2_GTCCGC_L001_R1_002.fastq.gz	Illumina WGS	HG002	Benchmark PSVGT on short reads
HG002	ftp://ftp-trace.ncbi.nlm.nih.gov/ReferenceSamples/giab/data/AshkenazimTrio/HG002_NA24385_son/NIST_HiSeq_HG002_Homogeneity-10953946/HG002_HiSeq300x_fastq/140611_D00360_0025_BH9UD6ADXX/Project_RM8391_RM8392/Sample_2D2/2D2_GTCCGC_L002_R1_001.fastq.gz	Illumina WGS	HG002	Benchmark PSVGT on short reads
HG002	ftp://ftp-trace.ncbi.nlm.nih.gov/ReferenceSamples/giab/data/AshkenazimTrio/HG002_NA24385_son/NIST_HiSeq_HG002_Homogeneity-10953946/HG002_HiSeq300x_fastq/140611_D00360_0025_BH9UD6ADXX/Project_RM8391_RM8392/Sample_2D2/2D2_GTCCGC_L002_R1_002.fastq.gz	Illumina WGS	HG002	Benchmark PSVGT on short reads
HG002	ftp://ftp-trace.ncbi.nlm.nih.gov/ReferenceSamples/giab/data/AshkenazimTrio/HG002_NA24385_son/NIST_HiSeq_HG002_Homogeneity-10953946/HG002_HiSeq300x_fastq/140611_D00360_0025_BH9UD6ADXX/Project_RM8391_RM8392/Sample_2F1/2F1_ACAGTG_L001_R1_001.fastq.gz	Illumina WGS	HG002	Benchmark PSVGT on short reads
HG002	ftp://ftp-trace.ncbi.nlm.nih.gov/ReferenceSamples/giab/data/AshkenazimTrio/HG002_NA24385_son/NIST_HiSeq_HG002_Homogeneity-10953946/HG002_HiSeq300x_fastq/140611_D00360_0025_BH9UD6ADXX/Project_RM8391_RM8392/Sample_2F1/2F1_ACAGTG_L001_R1_002.fastq.gz	Illumina WGS	HG002	Benchmark PSVGT on short reads
HG002	ftp://ftp-trace.ncbi.nlm.nih.gov/ReferenceSamples/giab/data/AshkenazimTrio/HG002_NA24385_son/NIST_HiSeq_HG002_Homogeneity-10953946/HG002_HiSeq300x_fastq/140611_D00360_0025_BH9UD6ADXX/Project_RM8391_RM8392/Sample_2F1/2F1_ACAGTG_L001_R1_003.fastq.gz	Illumina WGS	HG002	Benchmark PSVGT on short reads
HG002	ftp://ftp-trace.ncbi.nlm.nih.gov/ReferenceSamples/giab/data/AshkenazimTrio/HG002_NA24385_son/NIST_HiSeq_HG002_Homogeneity-10953946/HG002_HiSeq300x_fastq/140611_D00360_0025_BH9UD6ADXX/Project_RM8391_RM8392/Sample_2F1/2F1_ACAGTG_L001_R1_004.fastq.gz	Illumina WGS	HG002	Benchmark PSVGT on short reads
HG002	ftp://ftp-trace.ncbi.nlm.nih.gov/ReferenceSamples/giab/data/AshkenazimTrio/HG002_NA24385_son/NIST_HiSeq_HG002_Homogeneity-10953946/HG002_HiSeq300x_fastq/140611_D00360_0025_BH9UD6ADXX/Project_RM8391_RM8392/Sample_2F1/2F1_ACAGTG_L001_R1_005.fastq.gz	Illumina WGS	HG002	Benchmark PSVGT on short reads
HG002	ftp://ftp-trace.ncbi.nlm.nih.gov/ReferenceSamples/giab/data/AshkenazimTrio/HG002_NA24385_son/NIST_HiSeq_HG002_Homogeneity-10953946/HG002_HiSeq300x_fastq/140611_D00360_0025_BH9UD6ADXX/Project_RM8391_RM8392/Sample_2F1/2F1_ACAGTG_L001_R1_006.fastq.gz	Illumina WGS	HG002	Benchmark PSVGT on short reads
HG002	ftp://ftp-trace.ncbi.nlm.nih.gov/ReferenceSamples/giab/data/AshkenazimTrio/HG002_NA24385_son/NIST_HiSeq_HG002_Homogeneity-10953946/HG002_HiSeq300x_fastq/140611_D00360_0025_BH9UD6ADXX/Project_RM8391_RM8392/Sample_2F1/2F1_ACAGTG_L002_R1_001.fastq.gz	Illumina WGS	HG002	Benchmark PSVGT on short reads
HG002	ftp://ftp-trace.ncbi.nlm.nih.gov/ReferenceSamples/giab/data/AshkenazimTrio/HG002_NA24385_son/NIST_HiSeq_HG002_Homogeneity-10953946/HG002_HiSeq300x_fastq/140611_D00360_0025_BH9UD6ADXX/Project_RM8391_RM8392/Sample_2F1/2F1_ACAGTG_L002_R1_002.fastq.gz	Illumina WGS	HG002	Benchmark PSVGT on short reads
HG002	ftp://ftp-trace.ncbi.nlm.nih.gov/ReferenceSamples/giab/data/AshkenazimTrio/HG002_NA24385_son/NIST_HiSeq_HG002_Homogeneity-10953946/HG002_HiSeq300x_fastq/140611_D00360_0025_BH9UD6ADXX/Project_RM8391_RM8392/Sample_2F1/2F1_ACAGTG_L002_R1_003.fastq.gz	Illumina WGS	HG002	Benchmark PSVGT on short reads
HG002	ftp://ftp-trace.ncbi.nlm.nih.gov/ReferenceSamples/giab/data/AshkenazimTrio/HG002_NA24385_son/NIST_HiSeq_HG002_Homogeneity-10953946/HG002_HiSeq300x_fastq/140611_D00360_0025_BH9UD6ADXX/Project_RM8391_RM8392/Sample_2F1/2F1_ACAGTG_L002_R1_004.fastq.gz	Illumina WGS	HG002	Benchmark PSVGT on short reads
HG002	ftp://ftp-trace.ncbi.nlm.nih.gov/ReferenceSamples/giab/data/AshkenazimTrio/HG002_NA24385_son/NIST_HiSeq_HG002_Homogeneity-10953946/HG002_HiSeq300x_fastq/140611_D00360_0025_BH9UD6ADXX/Project_RM8391_RM8392/Sample_2F1/2F1_ACAGTG_L002_R1_005.fastq.gz	Illumina WGS	HG002	Benchmark PSVGT on short reads
HG002	ftp://ftp-trace.ncbi.nlm.nih.gov/ReferenceSamples/giab/data/AshkenazimTrio/HG002_NA24385_son/NIST_HiSeq_HG002_Homogeneity-10953946/HG002_HiSeq300x_fastq/140611_D00360_0025_BH9UD6ADXX/Project_RM8391_RM8392/Sample_2F1/2F1_ACAGTG_L002_R1_006.fastq.gz	Illumina WGS	HG002	Benchmark PSVGT on short reads
HG002	ftp://ftp-trace.ncbi.nlm.nih.gov/ReferenceSamples/giab/data/AshkenazimTrio/HG002_NA24385_son/NIST_HiSeq_HG002_Homogeneity-10953946/HG002_HiSeq300x_fastq/140611_D00360_0025_BH9UD6ADXX/Project_RM8391_RM8392/Sample_2F2/2F2_GCCAAT_L001_R1_001.fastq.gz	Illumina WGS	HG002	Benchmark PSVGT on short reads
HG002	ftp://ftp-trace.ncbi.nlm.nih.gov/ReferenceSamples/giab/data/AshkenazimTrio/HG002_NA24385_son/NIST_HiSeq_HG002_Homogeneity-10953946/HG002_HiSeq300x_fastq/140611_D00360_0025_BH9UD6ADXX/Project_RM8391_RM8392/Sample_2F2/2F2_GCCAAT_L001_R1_002.fastq.gz	Illumina WGS	HG002	Benchmark PSVGT on short reads
HG002	ftp://ftp-trace.ncbi.nlm.nih.gov/ReferenceSamples/giab/data/AshkenazimTrio/HG002_NA24385_son/NIST_HiSeq_HG002_Homogeneity-10953946/HG002_HiSeq300x_fastq/140611_D00360_0025_BH9UD6ADXX/Project_RM8391_RM8392/Sample_2F2/2F2_GCCAAT_L001_R1_003.fastq.gz	Illumina WGS	HG002	Benchmark PSVGT on short reads
HG002	ftp://ftp-trace.ncbi.nlm.nih.gov/ReferenceSamples/giab/data/AshkenazimTrio/HG002_NA24385_son/NIST_HiSeq_HG002_Homogeneity-10953946/HG002_HiSeq300x_fastq/140611_D00360_0025_BH9UD6ADXX/Project_RM8391_RM8392/Sample_2F2/2F2_GCCAAT_L001_R1_004.fastq.gz	Illumina WGS	HG002	Benchmark PSVGT on short reads
HG002	ftp://ftp-trace.ncbi.nlm.nih.gov/ReferenceSamples/giab/data/AshkenazimTrio/HG002_NA24385_son/NIST_HiSeq_HG002_Homogeneity-10953946/HG002_HiSeq300x_fastq/140611_D00360_0025_BH9UD6ADXX/Project_RM8391_RM8392/Sample_2F2/2F2_GCCAAT_L001_R1_005.fastq.gz	Illumina WGS	HG002	Benchmark PSVGT on short reads
HG002	ftp://ftp-trace.ncbi.nlm.nih.gov/ReferenceSamples/giab/data/AshkenazimTrio/HG002_NA24385_son/NIST_HiSeq_HG002_Homogeneity-10953946/HG002_HiSeq300x_fastq/140611_D00360_0025_BH9UD6ADXX/Project_RM8391_RM8392/Sample_2F2/2F2_GCCAAT_L001_R1_006.fastq.gz	Illumina WGS	HG002	Benchmark PSVGT on short reads
HG002	ftp://ftp-trace.ncbi.nlm.nih.gov/ReferenceSamples/giab/data/AshkenazimTrio/HG002_NA24385_son/NIST_HiSeq_HG002_Homogeneity-10953946/HG002_HiSeq300x_fastq/140611_D00360_0025_BH9UD6ADXX/Project_RM8391_RM8392/Sample_2F2/2F2_GCCAAT_L002_R1_001.fastq.gz	Illumina WGS	HG002	Benchmark PSVGT on short reads
HG002	ftp://ftp-trace.ncbi.nlm.nih.gov/ReferenceSamples/giab/data/AshkenazimTrio/HG002_NA24385_son/NIST_HiSeq_HG002_Homogeneity-10953946/HG002_HiSeq300x_fastq/140611_D00360_0025_BH9UD6ADXX/Project_RM8391_RM8392/Sample_2F2/2F2_GCCAAT_L002_R1_002.fastq.gz	Illumina WGS	HG002	Benchmark PSVGT on short reads
HG002	ftp://ftp-trace.ncbi.nlm.nih.gov/ReferenceSamples/giab/data/AshkenazimTrio/HG002_NA24385_son/NIST_HiSeq_HG002_Homogeneity-10953946/HG002_HiSeq300x_fastq/140611_D00360_0025_BH9UD6ADXX/Project_RM8391_RM8392/Sample_2F2/2F2_GCCAAT_L002_R1_003.fastq.gz	Illumina WGS	HG002	Benchmark PSVGT on short reads
HG002	ftp://ftp-trace.ncbi.nlm.nih.gov/ReferenceSamples/giab/data/AshkenazimTrio/HG002_NA24385_son/NIST_HiSeq_HG002_Homogeneity-10953946/HG002_HiSeq300x_fastq/140611_D00360_0025_BH9UD6ADXX/Project_RM8391_RM8392/Sample_2F2/2F2_GCCAAT_L002_R1_004.fastq.gz	Illumina WGS	HG002	Benchmark PSVGT on short reads
HG002	ftp://ftp-trace.ncbi.nlm.nih.gov/ReferenceSamples/giab/data/AshkenazimTrio/HG002_NA24385_son/NIST_HiSeq_HG002_Homogeneity-10953946/HG002_HiSeq300x_fastq/140611_D00360_0025_BH9UD6ADXX/Project_RM8391_RM8392/Sample_2F2/2F2_GCCAAT_L002_R1_005.fastq.gz	Illumina WGS	HG002	Benchmark PSVGT on short reads
HG002	ftp://ftp-trace.ncbi.nlm.nih.gov/ReferenceSamples/giab/data/AshkenazimTrio/HG002_NA24385_son/NIST_HiSeq_HG002_Homogeneity-10953946/HG002_HiSeq300x_fastq/140611_D00360_0025_BH9UD6ADXX/Project_RM8391_RM8392/Sample_2F2/2F2_GCCAAT_L002_R1_006.fastq.gz	Illumina WGS	HG002	Benchmark PSVGT on short reads
HG002	ftp://ftp-trace.ncbi.nlm.nih.gov/ReferenceSamples/giab/data/AshkenazimTrio/HG002_NA24385_son/NIST_HiSeq_HG002_Homogeneity-10953946/HG002_HiSeq300x_fastq/140611_D00360_0025_BH9UD6ADXX/Project_RM8391_RM8392/Sample_2L1/2L1_CTTGTA_L001_R1_001.fastq.gz	Illumina WGS	HG002	Benchmark PSVGT on short reads
HG002	ftp://ftp-trace.ncbi.nlm.nih.gov/ReferenceSamples/giab/data/AshkenazimTrio/HG002_NA24385_son/NIST_HiSeq_HG002_Homogeneity-10953946/HG002_HiSeq300x_fastq/140611_D00360_0025_BH9UD6ADXX/Project_RM8391_RM8392/Sample_2L1/2L1_CTTGTA_L001_R1_002.fastq.gz	Illumina WGS	HG002	Benchmark PSVGT on short reads
HG002	ftp://ftp-trace.ncbi.nlm.nih.gov/ReferenceSamples/giab/data/AshkenazimTrio/HG002_NA24385_son/NIST_HiSeq_HG002_Homogeneity-10953946/HG002_HiSeq300x_fastq/140611_D00360_0025_BH9UD6ADXX/Project_RM8391_RM8392/Sample_2L1/2L1_CTTGTA_L001_R1_003.fastq.gz	Illumina WGS	HG002	Benchmark PSVGT on short reads
HG002	ftp://ftp-trace.ncbi.nlm.nih.gov/ReferenceSamples/giab/data/AshkenazimTrio/HG002_NA24385_son/NIST_HiSeq_HG002_Homogeneity-10953946/HG002_HiSeq300x_fastq/140611_D00360_0025_BH9UD6ADXX/Project_RM8391_RM8392/Sample_2L1/2L1_CTTGTA_L001_R1_004.fastq.gz	Illumina WGS	HG002	Benchmark PSVGT on short reads
HG002	ftp://ftp-trace.ncbi.nlm.nih.gov/ReferenceSamples/giab/data/AshkenazimTrio/HG002_NA24385_son/NIST_HiSeq_HG002_Homogeneity-10953946/HG002_HiSeq300x_fastq/140611_D00360_0025_BH9UD6ADXX/Project_RM8391_RM8392/Sample_2L1/2L1_CTTGTA_L001_R1_005.fastq.gz	Illumina WGS	HG002	Benchmark PSVGT on short reads
HG002	ftp://ftp-trace.ncbi.nlm.nih.gov/ReferenceSamples/giab/data/AshkenazimTrio/HG002_NA24385_son/NIST_HiSeq_HG002_Homogeneity-10953946/HG002_HiSeq300x_fastq/140611_D00360_0025_BH9UD6ADXX/Project_RM8391_RM8392/Sample_2L1/2L1_CTTGTA_L001_R1_006.fastq.gz	Illumina WGS	HG002	Benchmark PSVGT on short reads
HG002	ftp://ftp-trace.ncbi.nlm.nih.gov/ReferenceSamples/giab/data/AshkenazimTrio/HG002_NA24385_son/NIST_HiSeq_HG002_Homogeneity-10953946/HG002_HiSeq300x_fastq/140611_D00360_0025_BH9UD6ADXX/Project_RM8391_RM8392/Sample_2L1/2L1_CTTGTA_L002_R1_001.fastq.gz	Illumina WGS	HG002	Benchmark PSVGT on short reads
HG002	ftp://ftp-trace.ncbi.nlm.nih.gov/ReferenceSamples/giab/data/AshkenazimTrio/HG002_NA24385_son/NIST_HiSeq_HG002_Homogeneity-10953946/HG002_HiSeq300x_fastq/140611_D00360_0025_BH9UD6ADXX/Project_RM8391_RM8392/Sample_2L1/2L1_CTTGTA_L002_R1_002.fastq.gz	Illumina WGS	HG002	Benchmark PSVGT on short reads
HG002	ftp://ftp-trace.ncbi.nlm.nih.gov/ReferenceSamples/giab/data/AshkenazimTrio/HG002_NA24385_son/NIST_HiSeq_HG002_Homogeneity-10953946/HG002_HiSeq300x_fastq/140611_D00360_0025_BH9UD6ADXX/Project_RM8391_RM8392/Sample_2L1/2L1_CTTGTA_L002_R1_003.fastq.gz	Illumina WGS	HG002	Benchmark PSVGT on short reads
HG002	ftp://ftp-trace.ncbi.nlm.nih.gov/ReferenceSamples/giab/data/AshkenazimTrio/HG002_NA24385_son/NIST_HiSeq_HG002_Homogeneity-10953946/HG002_HiSeq300x_fastq/140611_D00360_0025_BH9UD6ADXX/Project_RM8391_RM8392/Sample_2L1/2L1_CTTGTA_L002_R1_004.fastq.gz	Illumina WGS	HG002	Benchmark PSVGT on short reads
HG002	ftp://ftp-trace.ncbi.nlm.nih.gov/ReferenceSamples/giab/data/AshkenazimTrio/HG002_NA24385_son/NIST_HiSeq_HG002_Homogeneity-10953946/HG002_HiSeq300x_fastq/140611_D00360_0025_BH9UD6ADXX/Project_RM8391_RM8392/Sample_2L1/2L1_CTTGTA_L002_R1_005.fastq.gz	Illumina WGS	HG002	Benchmark PSVGT on short reads
HG002	ftp://ftp-trace.ncbi.nlm.nih.gov/ReferenceSamples/giab/data/AshkenazimTrio/HG002_NA24385_son/NIST_HiSeq_HG002_Homogeneity-10953946/HG002_HiSeq300x_fastq/140611_D00360_0025_BH9UD6ADXX/Project_RM8391_RM8392/Sample_2L1/2L1_CTTGTA_L002_R1_006.fastq.gz	Illumina WGS	HG002	Benchmark PSVGT on short reads
HG002	ftp://ftp-trace.ncbi.nlm.nih.gov/ReferenceSamples/giab/data/AshkenazimTrio/HG002_NA24385_son/NIST_HiSeq_HG002_Homogeneity-10953946/HG002_HiSeq300x_fastq/140611_D00360_0025_BH9UD6ADXX/Project_RM8391_RM8392/Sample_2L2/2L2_GTGAAA_L001_R1_001.fastq.gz	Illumina WGS	HG002	Benchmark PSVGT on short reads
HG002	ftp://ftp-trace.ncbi.nlm.nih.gov/ReferenceSamples/giab/data/AshkenazimTrio/HG002_NA24385_son/NIST_HiSeq_HG002_Homogeneity-10953946/HG002_HiSeq300x_fastq/140611_D00360_0025_BH9UD6ADXX/Project_RM8391_RM8392/Sample_2L2/2L2_GTGAAA_L001_R1_002.fastq.gz	Illumina WGS	HG002	Benchmark PSVGT on short reads
HG002	ftp://ftp-trace.ncbi.nlm.nih.gov/ReferenceSamples/giab/data/AshkenazimTrio/HG002_NA24385_son/NIST_HiSeq_HG002_Homogeneity-10953946/HG002_HiSeq300x_fastq/140611_D00360_0025_BH9UD6ADXX/Project_RM8391_RM8392/Sample_2L2/2L2_GTGAAA_L001_R1_003.fastq.gz	Illumina WGS	HG002	Benchmark PSVGT on short reads
HG002	ftp://ftp-trace.ncbi.nlm.nih.gov/ReferenceSamples/giab/data/AshkenazimTrio/HG002_NA24385_son/NIST_HiSeq_HG002_Homogeneity-10953946/HG002_HiSeq300x_fastq/140611_D00360_0025_BH9UD6ADXX/Project_RM8391_RM8392/Sample_2L2/2L2_GTGAAA_L001_R1_004.fastq.gz	Illumina WGS	HG002	Benchmark PSVGT on short reads
HG002	ftp://ftp-trace.ncbi.nlm.nih.gov/ReferenceSamples/giab/data/AshkenazimTrio/HG002_NA24385_son/NIST_HiSeq_HG002_Homogeneity-10953946/HG002_HiSeq300x_fastq/140611_D00360_0025_BH9UD6ADXX/Project_RM8391_RM8392/Sample_2L2/2L2_GTGAAA_L001_R1_005.fastq.gz	Illumina WGS	HG002	Benchmark PSVGT on short reads
HG002	ftp://ftp-trace.ncbi.nlm.nih.gov/ReferenceSamples/giab/data/AshkenazimTrio/HG002_NA24385_son/NIST_HiSeq_HG002_Homogeneity-10953946/HG002_HiSeq300x_fastq/140611_D00360_0025_BH9UD6ADXX/Project_RM8391_RM8392/Sample_2L2/2L2_GTGAAA_L001_R1_006.fastq.gz	Illumina WGS	HG002	Benchmark PSVGT on short reads
HG002	ftp://ftp-trace.ncbi.nlm.nih.gov/ReferenceSamples/giab/data/AshkenazimTrio/HG002_NA24385_son/NIST_HiSeq_HG002_Homogeneity-10953946/HG002_HiSeq300x_fastq/140611_D00360_0025_BH9UD6ADXX/Project_RM8391_RM8392/Sample_2L2/2L2_GTGAAA_L002_R1_001.fastq.gz	Illumina WGS	HG002	Benchmark PSVGT on short reads
HG002	ftp://ftp-trace.ncbi.nlm.nih.gov/ReferenceSamples/giab/data/AshkenazimTrio/HG002_NA24385_son/NIST_HiSeq_HG002_Homogeneity-10953946/HG002_HiSeq300x_fastq/140611_D00360_0025_BH9UD6ADXX/Project_RM8391_RM8392/Sample_2L2/2L2_GTGAAA_L002_R1_002.fastq.gz	Illumina WGS	HG002	Benchmark PSVGT on short reads
HG002	ftp://ftp-trace.ncbi.nlm.nih.gov/ReferenceSamples/giab/data/AshkenazimTrio/HG002_NA24385_son/NIST_HiSeq_HG002_Homogeneity-10953946/HG002_HiSeq300x_fastq/140611_D00360_0025_BH9UD6ADXX/Project_RM8391_RM8392/Sample_2L2/2L2_GTGAAA_L002_R1_003.fastq.gz	Illumina WGS	HG002	Benchmark PSVGT on short reads
HG002	ftp://ftp-trace.ncbi.nlm.nih.gov/ReferenceSamples/giab/data/AshkenazimTrio/HG002_NA24385_son/NIST_HiSeq_HG002_Homogeneity-10953946/HG002_HiSeq300x_fastq/140611_D00360_0025_BH9UD6ADXX/Project_RM8391_RM8392/Sample_2L2/2L2_GTGAAA_L002_R1_004.fastq.gz	Illumina WGS	HG002	Benchmark PSVGT on short reads
HG002	ftp://ftp-trace.ncbi.nlm.nih.gov/ReferenceSamples/giab/data/AshkenazimTrio/HG002_NA24385_son/NIST_HiSeq_HG002_Homogeneity-10953946/HG002_HiSeq300x_fastq/140611_D00360_0025_BH9UD6ADXX/Project_RM8391_RM8392/Sample_2L2/2L2_GTGAAA_L002_R1_005.fastq.gz	Illumina WGS	HG002	Benchmark PSVGT on short reads
HG002	ftp://ftp-trace.ncbi.nlm.nih.gov/ReferenceSamples/giab/data/AshkenazimTrio/HG002_NA24385_son/NIST_HiSeq_HG002_Homogeneity-10953946/HG002_HiSeq300x_fastq/140611_D00360_0025_BH9UD6ADXX/Project_RM8391_RM8392/Sample_2L2/2L2_GTGAAA_L002_R1_006.fastq.gz	Illumina WGS	HG002	Benchmark PSVGT on short reads
HG002	ftp://ftp-trace.ncbi.nlm.nih.gov/ReferenceSamples/giab/data/AshkenazimTrio/HG002_NA24385_son/NIST_HiSeq_HG002_Homogeneity-10953946/HG002_HiSeq300x_fastq/140613_D00360_0026_AHA2RRADXX/Project_RM8391_RM8392/Sample_2A1/2A1_CGATGT_L001_R1_001.fastq.gz	Illumina WGS	HG002	Benchmark PSVGT on short reads
HG002	ftp://ftp-trace.ncbi.nlm.nih.gov/ReferenceSamples/giab/data/AshkenazimTrio/HG002_NA24385_son/NIST_HiSeq_HG002_Homogeneity-10953946/HG002_HiSeq300x_fastq/140613_D00360_0026_AHA2RRADXX/Project_RM8391_RM8392/Sample_2A1/2A1_CGATGT_L001_R1_002.fastq.gz	Illumina WGS	HG002	Benchmark PSVGT on short reads
HG002	ftp://ftp-trace.ncbi.nlm.nih.gov/ReferenceSamples/giab/data/AshkenazimTrio/HG002_NA24385_son/NIST_HiSeq_HG002_Homogeneity-10953946/HG002_HiSeq300x_fastq/140613_D00360_0026_AHA2RRADXX/Project_RM8391_RM8392/Sample_2A1/2A1_CGATGT_L002_R1_001.fastq.gz	Illumina WGS	HG002	Benchmark PSVGT on short reads
HG002	ftp://ftp-trace.ncbi.nlm.nih.gov/ReferenceSamples/giab/data/AshkenazimTrio/HG002_NA24385_son/NIST_HiSeq_HG002_Homogeneity-10953946/HG002_HiSeq300x_fastq/140613_D00360_0026_AHA2RRADXX/Project_RM8391_RM8392/Sample_2A1/2A1_CGATGT_L002_R1_002.fastq.gz	Illumina WGS	HG002	Benchmark PSVGT on short reads
HG002	ftp://ftp-trace.ncbi.nlm.nih.gov/ReferenceSamples/giab/data/AshkenazimTrio/HG002_NA24385_son/NIST_HiSeq_HG002_Homogeneity-10953946/HG002_HiSeq300x_fastq/140613_D00360_0026_AHA2RRADXX/Project_RM8391_RM8392/Sample_2A2/2A2_TGACCA_L001_R1_001.fastq.gz	Illumina WGS	HG002	Benchmark PSVGT on short reads
HG002	ftp://ftp-trace.ncbi.nlm.nih.gov/ReferenceSamples/giab/data/AshkenazimTrio/HG002_NA24385_son/NIST_HiSeq_HG002_Homogeneity-10953946/HG002_HiSeq300x_fastq/140613_D00360_0026_AHA2RRADXX/Project_RM8391_RM8392/Sample_2A2/2A2_TGACCA_L001_R1_002.fastq.gz	Illumina WGS	HG002	Benchmark PSVGT on short reads
HG002	ftp://ftp-trace.ncbi.nlm.nih.gov/ReferenceSamples/giab/data/AshkenazimTrio/HG002_NA24385_son/NIST_HiSeq_HG002_Homogeneity-10953946/HG002_HiSeq300x_fastq/140613_D00360_0026_AHA2RRADXX/Project_RM8391_RM8392/Sample_2A2/2A2_TGACCA_L002_R1_001.fastq.gz	Illumina WGS	HG002	Benchmark PSVGT on short reads
HG002	ftp://ftp-trace.ncbi.nlm.nih.gov/ReferenceSamples/giab/data/AshkenazimTrio/HG002_NA24385_son/NIST_HiSeq_HG002_Homogeneity-10953946/HG002_HiSeq300x_fastq/140613_D00360_0026_AHA2RRADXX/Project_RM8391_RM8392/Sample_2A2/2A2_TGACCA_L002_R1_002.fastq.gz	Illumina WGS	HG002	Benchmark PSVGT on short reads
HG002	ftp://ftp-trace.ncbi.nlm.nih.gov/ReferenceSamples/giab/data/AshkenazimTrio/HG002_NA24385_son/NIST_HiSeq_HG002_Homogeneity-10953946/HG002_HiSeq300x_fastq/140613_D00360_0026_AHA2RRADXX/Project_RM8391_RM8392/Sample_2B1/2B1_CAGATC_L001_R1_001.fastq.gz	Illumina WGS	HG002	Benchmark PSVGT on short reads
HG002	ftp://ftp-trace.ncbi.nlm.nih.gov/ReferenceSamples/giab/data/AshkenazimTrio/HG002_NA24385_son/NIST_HiSeq_HG002_Homogeneity-10953946/HG002_HiSeq300x_fastq/140613_D00360_0026_AHA2RRADXX/Project_RM8391_RM8392/Sample_2B1/2B1_CAGATC_L001_R1_002.fastq.gz	Illumina WGS	HG002	Benchmark PSVGT on short reads
HG002	ftp://ftp-trace.ncbi.nlm.nih.gov/ReferenceSamples/giab/data/AshkenazimTrio/HG002_NA24385_son/NIST_HiSeq_HG002_Homogeneity-10953946/HG002_HiSeq300x_fastq/140613_D00360_0026_AHA2RRADXX/Project_RM8391_RM8392/Sample_2B1/2B1_CAGATC_L002_R1_001.fastq.gz	Illumina WGS	HG002	Benchmark PSVGT on short reads
HG002	ftp://ftp-trace.ncbi.nlm.nih.gov/ReferenceSamples/giab/data/AshkenazimTrio/HG002_NA24385_son/NIST_HiSeq_HG002_Homogeneity-10953946/HG002_HiSeq300x_fastq/140613_D00360_0026_AHA2RRADXX/Project_RM8391_RM8392/Sample_2B1/2B1_CAGATC_L002_R1_002.fastq.gz	Illumina WGS	HG002	Benchmark PSVGT on short reads
HG002	ftp://ftp-trace.ncbi.nlm.nih.gov/ReferenceSamples/giab/data/AshkenazimTrio/HG002_NA24385_son/NIST_HiSeq_HG002_Homogeneity-10953946/HG002_HiSeq300x_fastq/140613_D00360_0026_AHA2RRADXX/Project_RM8391_RM8392/Sample_2B2/2B2_CCGTCC_L001_R1_001.fastq.gz	Illumina WGS	HG002	Benchmark PSVGT on short reads
HG002	ftp://ftp-trace.ncbi.nlm.nih.gov/ReferenceSamples/giab/data/AshkenazimTrio/HG002_NA24385_son/NIST_HiSeq_HG002_Homogeneity-10953946/HG002_HiSeq300x_fastq/140613_D00360_0026_AHA2RRADXX/Project_RM8391_RM8392/Sample_2B2/2B2_CCGTCC_L001_R1_002.fastq.gz	Illumina WGS	HG002	Benchmark PSVGT on short reads
HG002	ftp://ftp-trace.ncbi.nlm.nih.gov/ReferenceSamples/giab/data/AshkenazimTrio/HG002_NA24385_son/NIST_HiSeq_HG002_Homogeneity-10953946/HG002_HiSeq300x_fastq/140613_D00360_0026_AHA2RRADXX/Project_RM8391_RM8392/Sample_2B2/2B2_CCGTCC_L002_R1_001.fastq.gz	Illumina WGS	HG002	Benchmark PSVGT on short reads
HG002	ftp://ftp-trace.ncbi.nlm.nih.gov/ReferenceSamples/giab/data/AshkenazimTrio/HG002_NA24385_son/NIST_HiSeq_HG002_Homogeneity-10953946/HG002_HiSeq300x_fastq/140613_D00360_0026_AHA2RRADXX/Project_RM8391_RM8392/Sample_2B2/2B2_CCGTCC_L002_R1_002.fastq.gz	Illumina WGS	HG002	Benchmark PSVGT on short reads
HG002	ftp://ftp-trace.ncbi.nlm.nih.gov/ReferenceSamples/giab/data/AshkenazimTrio/HG002_NA24385_son/NIST_HiSeq_HG002_Homogeneity-10953946/HG002_HiSeq300x_fastq/140613_D00360_0026_AHA2RRADXX/Project_RM8391_RM8392/Sample_2C1/2C1_AGTCAA_L001_R1_001.fastq.gz	Illumina WGS	HG002	Benchmark PSVGT on short reads
HG002	ftp://ftp-trace.ncbi.nlm.nih.gov/ReferenceSamples/giab/data/AshkenazimTrio/HG002_NA24385_son/NIST_HiSeq_HG002_Homogeneity-10953946/HG002_HiSeq300x_fastq/140613_D00360_0026_AHA2RRADXX/Project_RM8391_RM8392/Sample_2C1/2C1_AGTCAA_L001_R1_002.fastq.gz	Illumina WGS	HG002	Benchmark PSVGT on short reads
HG002	ftp://ftp-trace.ncbi.nlm.nih.gov/ReferenceSamples/giab/data/AshkenazimTrio/HG002_NA24385_son/NIST_HiSeq_HG002_Homogeneity-10953946/HG002_HiSeq300x_fastq/140613_D00360_0026_AHA2RRADXX/Project_RM8391_RM8392/Sample_2C1/2C1_AGTCAA_L002_R1_001.fastq.gz	Illumina WGS	HG002	Benchmark PSVGT on short reads
HG002	ftp://ftp-trace.ncbi.nlm.nih.gov/ReferenceSamples/giab/data/AshkenazimTrio/HG002_NA24385_son/NIST_HiSeq_HG002_Homogeneity-10953946/HG002_HiSeq300x_fastq/140613_D00360_0026_AHA2RRADXX/Project_RM8391_RM8392/Sample_2C1/2C1_AGTCAA_L002_R1_002.fastq.gz	Illumina WGS	HG002	Benchmark PSVGT on short reads
HG002	ftp://ftp-trace.ncbi.nlm.nih.gov/ReferenceSamples/giab/data/AshkenazimTrio/HG002_NA24385_son/NIST_HiSeq_HG002_Homogeneity-10953946/HG002_HiSeq300x_fastq/140613_D00360_0026_AHA2RRADXX/Project_RM8391_RM8392/Sample_2C2/2C2_AGTTCC_L001_R1_001.fastq.gz	Illumina WGS	HG002	Benchmark PSVGT on short reads
HG002	ftp://ftp-trace.ncbi.nlm.nih.gov/ReferenceSamples/giab/data/AshkenazimTrio/HG002_NA24385_son/NIST_HiSeq_HG002_Homogeneity-10953946/HG002_HiSeq300x_fastq/140613_D00360_0026_AHA2RRADXX/Project_RM8391_RM8392/Sample_2C2/2C2_AGTTCC_L001_R1_002.fastq.gz	Illumina WGS	HG002	Benchmark PSVGT on short reads
HG002	ftp://ftp-trace.ncbi.nlm.nih.gov/ReferenceSamples/giab/data/AshkenazimTrio/HG002_NA24385_son/NIST_HiSeq_HG002_Homogeneity-10953946/HG002_HiSeq300x_fastq/140613_D00360_0026_AHA2RRADXX/Project_RM8391_RM8392/Sample_2C2/2C2_AGTTCC_L002_R1_001.fastq.gz	Illumina WGS	HG002	Benchmark PSVGT on short reads
HG002	ftp://ftp-trace.ncbi.nlm.nih.gov/ReferenceSamples/giab/data/AshkenazimTrio/HG002_NA24385_son/NIST_HiSeq_HG002_Homogeneity-10953946/HG002_HiSeq300x_fastq/140613_D00360_0026_AHA2RRADXX/Project_RM8391_RM8392/Sample_2C2/2C2_AGTTCC_L002_R1_002.fastq.gz	Illumina WGS	HG002	Benchmark PSVGT on short reads
HG002	ftp://ftp-trace.ncbi.nlm.nih.gov/ReferenceSamples/giab/data/AshkenazimTrio/HG002_NA24385_son/NIST_HiSeq_HG002_Homogeneity-10953946/HG002_HiSeq300x_fastq/140613_D00360_0026_AHA2RRADXX/Project_RM8391_RM8392/Sample_2D1/2D1_ATGTCA_L001_R1_001.fastq.gz	Illumina WGS	HG002	Benchmark PSVGT on short reads
HG002	ftp://ftp-trace.ncbi.nlm.nih.gov/ReferenceSamples/giab/data/AshkenazimTrio/HG002_NA24385_son/NIST_HiSeq_HG002_Homogeneity-10953946/HG002_HiSeq300x_fastq/140613_D00360_0026_AHA2RRADXX/Project_RM8391_RM8392/Sample_2D1/2D1_ATGTCA_L001_R1_002.fastq.gz	Illumina WGS	HG002	Benchmark PSVGT on short reads
HG002	ftp://ftp-trace.ncbi.nlm.nih.gov/ReferenceSamples/giab/data/AshkenazimTrio/HG002_NA24385_son/NIST_HiSeq_HG002_Homogeneity-10953946/HG002_HiSeq300x_fastq/140613_D00360_0026_AHA2RRADXX/Project_RM8391_RM8392/Sample_2D1/2D1_ATGTCA_L002_R1_001.fastq.gz	Illumina WGS	HG002	Benchmark PSVGT on short reads
HG002	ftp://ftp-trace.ncbi.nlm.nih.gov/ReferenceSamples/giab/data/AshkenazimTrio/HG002_NA24385_son/NIST_HiSeq_HG002_Homogeneity-10953946/HG002_HiSeq300x_fastq/140613_D00360_0026_AHA2RRADXX/Project_RM8391_RM8392/Sample_2D1/2D1_ATGTCA_L002_R1_002.fastq.gz	Illumina WGS	HG002	Benchmark PSVGT on short reads
HG002	ftp://ftp-trace.ncbi.nlm.nih.gov/ReferenceSamples/giab/data/AshkenazimTrio/HG002_NA24385_son/NIST_HiSeq_HG002_Homogeneity-10953946/HG002_HiSeq300x_fastq/140613_D00360_0026_AHA2RRADXX/Project_RM8391_RM8392/Sample_2D2/2D2_GTCCGC_L001_R1_001.fastq.gz	Illumina WGS	HG002	Benchmark PSVGT on short reads
HG002	ftp://ftp-trace.ncbi.nlm.nih.gov/ReferenceSamples/giab/data/AshkenazimTrio/HG002_NA24385_son/NIST_HiSeq_HG002_Homogeneity-10953946/HG002_HiSeq300x_fastq/140613_D00360_0026_AHA2RRADXX/Project_RM8391_RM8392/Sample_2D2/2D2_GTCCGC_L001_R1_002.fastq.gz	Illumina WGS	HG002	Benchmark PSVGT on short reads
HG002	ftp://ftp-trace.ncbi.nlm.nih.gov/ReferenceSamples/giab/data/AshkenazimTrio/HG002_NA24385_son/NIST_HiSeq_HG002_Homogeneity-10953946/HG002_HiSeq300x_fastq/140613_D00360_0026_AHA2RRADXX/Project_RM8391_RM8392/Sample_2D2/2D2_GTCCGC_L002_R1_001.fastq.gz	Illumina WGS	HG002	Benchmark PSVGT on short reads
HG002	ftp://ftp-trace.ncbi.nlm.nih.gov/ReferenceSamples/giab/data/AshkenazimTrio/HG002_NA24385_son/NIST_HiSeq_HG002_Homogeneity-10953946/HG002_HiSeq300x_fastq/140613_D00360_0026_AHA2RRADXX/Project_RM8391_RM8392/Sample_2D2/2D2_GTCCGC_L002_R1_002.fastq.gz	Illumina WGS	HG002	Benchmark PSVGT on short reads
HG002	ftp://ftp-trace.ncbi.nlm.nih.gov/ReferenceSamples/giab/data/AshkenazimTrio/HG002_NA24385_son/NIST_HiSeq_HG002_Homogeneity-10953946/HG002_HiSeq300x_fastq/140613_D00360_0026_AHA2RRADXX/Project_RM8391_RM8392/Sample_2F1/2F1_ACAGTG_L001_R1_001.fastq.gz	Illumina WGS	HG002	Benchmark PSVGT on short reads
HG002	ftp://ftp-trace.ncbi.nlm.nih.gov/ReferenceSamples/giab/data/AshkenazimTrio/HG002_NA24385_son/NIST_HiSeq_HG002_Homogeneity-10953946/HG002_HiSeq300x_fastq/140613_D00360_0026_AHA2RRADXX/Project_RM8391_RM8392/Sample_2F1/2F1_ACAGTG_L001_R1_002.fastq.gz	Illumina WGS	HG002	Benchmark PSVGT on short reads
HG002	ftp://ftp-trace.ncbi.nlm.nih.gov/ReferenceSamples/giab/data/AshkenazimTrio/HG002_NA24385_son/NIST_HiSeq_HG002_Homogeneity-10953946/HG002_HiSeq300x_fastq/140613_D00360_0026_AHA2RRADXX/Project_RM8391_RM8392/Sample_2F1/2F1_ACAGTG_L001_R1_003.fastq.gz	Illumina WGS	HG002	Benchmark PSVGT on short reads
HG002	ftp://ftp-trace.ncbi.nlm.nih.gov/ReferenceSamples/giab/data/AshkenazimTrio/HG002_NA24385_son/NIST_HiSeq_HG002_Homogeneity-10953946/HG002_HiSeq300x_fastq/140613_D00360_0026_AHA2RRADXX/Project_RM8391_RM8392/Sample_2F1/2F1_ACAGTG_L001_R1_004.fastq.gz	Illumina WGS	HG002	Benchmark PSVGT on short reads
HG002	ftp://ftp-trace.ncbi.nlm.nih.gov/ReferenceSamples/giab/data/AshkenazimTrio/HG002_NA24385_son/NIST_HiSeq_HG002_Homogeneity-10953946/HG002_HiSeq300x_fastq/140613_D00360_0026_AHA2RRADXX/Project_RM8391_RM8392/Sample_2F1/2F1_ACAGTG_L001_R1_005.fastq.gz	Illumina WGS	HG002	Benchmark PSVGT on short reads
HG002	ftp://ftp-trace.ncbi.nlm.nih.gov/ReferenceSamples/giab/data/AshkenazimTrio/HG002_NA24385_son/NIST_HiSeq_HG002_Homogeneity-10953946/HG002_HiSeq300x_fastq/140613_D00360_0026_AHA2RRADXX/Project_RM8391_RM8392/Sample_2F1/2F1_ACAGTG_L001_R1_006.fastq.gz	Illumina WGS	HG002	Benchmark PSVGT on short reads
HG002	ftp://ftp-trace.ncbi.nlm.nih.gov/ReferenceSamples/giab/data/AshkenazimTrio/HG002_NA24385_son/NIST_HiSeq_HG002_Homogeneity-10953946/HG002_HiSeq300x_fastq/140613_D00360_0026_AHA2RRADXX/Project_RM8391_RM8392/Sample_2F1/2F1_ACAGTG_L002_R1_001.fastq.gz	Illumina WGS	HG002	Benchmark PSVGT on short reads
HG002	ftp://ftp-trace.ncbi.nlm.nih.gov/ReferenceSamples/giab/data/AshkenazimTrio/HG002_NA24385_son/NIST_HiSeq_HG002_Homogeneity-10953946/HG002_HiSeq300x_fastq/140613_D00360_0026_AHA2RRADXX/Project_RM8391_RM8392/Sample_2F1/2F1_ACAGTG_L002_R1_002.fastq.gz	Illumina WGS	HG002	Benchmark PSVGT on short reads
HG002	ftp://ftp-trace.ncbi.nlm.nih.gov/ReferenceSamples/giab/data/AshkenazimTrio/HG002_NA24385_son/NIST_HiSeq_HG002_Homogeneity-10953946/HG002_HiSeq300x_fastq/140613_D00360_0026_AHA2RRADXX/Project_RM8391_RM8392/Sample_2F1/2F1_ACAGTG_L002_R1_003.fastq.gz	Illumina WGS	HG002	Benchmark PSVGT on short reads
HG002	ftp://ftp-trace.ncbi.nlm.nih.gov/ReferenceSamples/giab/data/AshkenazimTrio/HG002_NA24385_son/NIST_HiSeq_HG002_Homogeneity-10953946/HG002_HiSeq300x_fastq/140613_D00360_0026_AHA2RRADXX/Project_RM8391_RM8392/Sample_2F1/2F1_ACAGTG_L002_R1_004.fastq.gz	Illumina WGS	HG002	Benchmark PSVGT on short reads
HG002	ftp://ftp-trace.ncbi.nlm.nih.gov/ReferenceSamples/giab/data/AshkenazimTrio/HG002_NA24385_son/NIST_HiSeq_HG002_Homogeneity-10953946/HG002_HiSeq300x_fastq/140613_D00360_0026_AHA2RRADXX/Project_RM8391_RM8392/Sample_2F1/2F1_ACAGTG_L002_R1_005.fastq.gz	Illumina WGS	HG002	Benchmark PSVGT on short reads
HG002	ftp://ftp-trace.ncbi.nlm.nih.gov/ReferenceSamples/giab/data/AshkenazimTrio/HG002_NA24385_son/NIST_HiSeq_HG002_Homogeneity-10953946/HG002_HiSeq300x_fastq/140613_D00360_0026_AHA2RRADXX/Project_RM8391_RM8392/Sample_2F1/2F1_ACAGTG_L002_R1_006.fastq.gz	Illumina WGS	HG002	Benchmark PSVGT on short reads
HG002	ftp://ftp-trace.ncbi.nlm.nih.gov/ReferenceSamples/giab/data/AshkenazimTrio/HG002_NA24385_son/NIST_HiSeq_HG002_Homogeneity-10953946/HG002_HiSeq300x_fastq/140613_D00360_0026_AHA2RRADXX/Project_RM8391_RM8392/Sample_2F2/2F2_GCCAAT_L001_R1_001.fastq.gz	Illumina WGS	HG002	Benchmark PSVGT on short reads
HG002	ftp://ftp-trace.ncbi.nlm.nih.gov/ReferenceSamples/giab/data/AshkenazimTrio/HG002_NA24385_son/NIST_HiSeq_HG002_Homogeneity-10953946/HG002_HiSeq300x_fastq/140613_D00360_0026_AHA2RRADXX/Project_RM8391_RM8392/Sample_2F2/2F2_GCCAAT_L001_R1_002.fastq.gz	Illumina WGS	HG002	Benchmark PSVGT on short reads
HG002	ftp://ftp-trace.ncbi.nlm.nih.gov/ReferenceSamples/giab/data/AshkenazimTrio/HG002_NA24385_son/NIST_HiSeq_HG002_Homogeneity-10953946/HG002_HiSeq300x_fastq/140613_D00360_0026_AHA2RRADXX/Project_RM8391_RM8392/Sample_2F2/2F2_GCCAAT_L001_R1_003.fastq.gz	Illumina WGS	HG002	Benchmark PSVGT on short reads
HG002	ftp://ftp-trace.ncbi.nlm.nih.gov/ReferenceSamples/giab/data/AshkenazimTrio/HG002_NA24385_son/NIST_HiSeq_HG002_Homogeneity-10953946/HG002_HiSeq300x_fastq/140613_D00360_0026_AHA2RRADXX/Project_RM8391_RM8392/Sample_2F2/2F2_GCCAAT_L001_R1_004.fastq.gz	Illumina WGS	HG002	Benchmark PSVGT on short reads
HG002	ftp://ftp-trace.ncbi.nlm.nih.gov/ReferenceSamples/giab/data/AshkenazimTrio/HG002_NA24385_son/NIST_HiSeq_HG002_Homogeneity-10953946/HG002_HiSeq300x_fastq/140613_D00360_0026_AHA2RRADXX/Project_RM8391_RM8392/Sample_2F2/2F2_GCCAAT_L001_R1_005.fastq.gz	Illumina WGS	HG002	Benchmark PSVGT on short reads
HG002	ftp://ftp-trace.ncbi.nlm.nih.gov/ReferenceSamples/giab/data/AshkenazimTrio/HG002_NA24385_son/NIST_HiSeq_HG002_Homogeneity-10953946/HG002_HiSeq300x_fastq/140613_D00360_0026_AHA2RRADXX/Project_RM8391_RM8392/Sample_2F2/2F2_GCCAAT_L001_R1_006.fastq.gz	Illumina WGS	HG002	Benchmark PSVGT on short reads
HG002	ftp://ftp-trace.ncbi.nlm.nih.gov/ReferenceSamples/giab/data/AshkenazimTrio/HG002_NA24385_son/NIST_HiSeq_HG002_Homogeneity-10953946/HG002_HiSeq300x_fastq/140613_D00360_0026_AHA2RRADXX/Project_RM8391_RM8392/Sample_2F2/2F2_GCCAAT_L002_R1_001.fastq.gz	Illumina WGS	HG002	Benchmark PSVGT on short reads
HG002	ftp://ftp-trace.ncbi.nlm.nih.gov/ReferenceSamples/giab/data/AshkenazimTrio/HG002_NA24385_son/NIST_HiSeq_HG002_Homogeneity-10953946/HG002_HiSeq300x_fastq/140613_D00360_0026_AHA2RRADXX/Project_RM8391_RM8392/Sample_2F2/2F2_GCCAAT_L002_R1_002.fastq.gz	Illumina WGS	HG002	Benchmark PSVGT on short reads
HG002	ftp://ftp-trace.ncbi.nlm.nih.gov/ReferenceSamples/giab/data/AshkenazimTrio/HG002_NA24385_son/NIST_HiSeq_HG002_Homogeneity-10953946/HG002_HiSeq300x_fastq/140613_D00360_0026_AHA2RRADXX/Project_RM8391_RM8392/Sample_2F2/2F2_GCCAAT_L002_R1_003.fastq.gz	Illumina WGS	HG002	Benchmark PSVGT on short reads
HG002	ftp://ftp-trace.ncbi.nlm.nih.gov/ReferenceSamples/giab/data/AshkenazimTrio/HG002_NA24385_son/NIST_HiSeq_HG002_Homogeneity-10953946/HG002_HiSeq300x_fastq/140613_D00360_0026_AHA2RRADXX/Project_RM8391_RM8392/Sample_2F2/2F2_GCCAAT_L002_R1_004.fastq.gz	Illumina WGS	HG002	Benchmark PSVGT on short reads
HG002	ftp://ftp-trace.ncbi.nlm.nih.gov/ReferenceSamples/giab/data/AshkenazimTrio/HG002_NA24385_son/NIST_HiSeq_HG002_Homogeneity-10953946/HG002_HiSeq300x_fastq/140613_D00360_0026_AHA2RRADXX/Project_RM8391_RM8392/Sample_2F2/2F2_GCCAAT_L002_R1_005.fastq.gz	Illumina WGS	HG002	Benchmark PSVGT on short reads
HG002	ftp://ftp-trace.ncbi.nlm.nih.gov/ReferenceSamples/giab/data/AshkenazimTrio/HG002_NA24385_son/NIST_HiSeq_HG002_Homogeneity-10953946/HG002_HiSeq300x_fastq/140613_D00360_0026_AHA2RRADXX/Project_RM8391_RM8392/Sample_2F2/2F2_GCCAAT_L002_R1_006.fastq.gz	Illumina WGS	HG002	Benchmark PSVGT on short reads
HG002	ftp://ftp-trace.ncbi.nlm.nih.gov/ReferenceSamples/giab/data/AshkenazimTrio/HG002_NA24385_son/NIST_HiSeq_HG002_Homogeneity-10953946/HG002_HiSeq300x_fastq/140613_D00360_0026_AHA2RRADXX/Project_RM8391_RM8392/Sample_2L1/2L1_CTTGTA_L001_R1_001.fastq.gz	Illumina WGS	HG002	Benchmark PSVGT on short reads
HG002	ftp://ftp-trace.ncbi.nlm.nih.gov/ReferenceSamples/giab/data/AshkenazimTrio/HG002_NA24385_son/NIST_HiSeq_HG002_Homogeneity-10953946/HG002_HiSeq300x_fastq/140613_D00360_0026_AHA2RRADXX/Project_RM8391_RM8392/Sample_2L1/2L1_CTTGTA_L001_R1_002.fastq.gz	Illumina WGS	HG002	Benchmark PSVGT on short reads
HG002	ftp://ftp-trace.ncbi.nlm.nih.gov/ReferenceSamples/giab/data/AshkenazimTrio/HG002_NA24385_son/NIST_HiSeq_HG002_Homogeneity-10953946/HG002_HiSeq300x_fastq/140613_D00360_0026_AHA2RRADXX/Project_RM8391_RM8392/Sample_2L1/2L1_CTTGTA_L001_R1_003.fastq.gz	Illumina WGS	HG002	Benchmark PSVGT on short reads
HG002	ftp://ftp-trace.ncbi.nlm.nih.gov/ReferenceSamples/giab/data/AshkenazimTrio/HG002_NA24385_son/NIST_HiSeq_HG002_Homogeneity-10953946/HG002_HiSeq300x_fastq/140613_D00360_0026_AHA2RRADXX/Project_RM8391_RM8392/Sample_2L1/2L1_CTTGTA_L001_R1_004.fastq.gz	Illumina WGS	HG002	Benchmark PSVGT on short reads
HG002	ftp://ftp-trace.ncbi.nlm.nih.gov/ReferenceSamples/giab/data/AshkenazimTrio/HG002_NA24385_son/NIST_HiSeq_HG002_Homogeneity-10953946/HG002_HiSeq300x_fastq/140613_D00360_0026_AHA2RRADXX/Project_RM8391_RM8392/Sample_2L1/2L1_CTTGTA_L001_R1_005.fastq.gz	Illumina WGS	HG002	Benchmark PSVGT on short reads
HG002	ftp://ftp-trace.ncbi.nlm.nih.gov/ReferenceSamples/giab/data/AshkenazimTrio/HG002_NA24385_son/NIST_HiSeq_HG002_Homogeneity-10953946/HG002_HiSeq300x_fastq/140613_D00360_0026_AHA2RRADXX/Project_RM8391_RM8392/Sample_2L1/2L1_CTTGTA_L001_R1_006.fastq.gz	Illumina WGS	HG002	Benchmark PSVGT on short reads
HG002	ftp://ftp-trace.ncbi.nlm.nih.gov/ReferenceSamples/giab/data/AshkenazimTrio/HG002_NA24385_son/NIST_HiSeq_HG002_Homogeneity-10953946/HG002_HiSeq300x_fastq/140613_D00360_0026_AHA2RRADXX/Project_RM8391_RM8392/Sample_2L1/2L1_CTTGTA_L002_R1_001.fastq.gz	Illumina WGS	HG002	Benchmark PSVGT on short reads
HG002	ftp://ftp-trace.ncbi.nlm.nih.gov/ReferenceSamples/giab/data/AshkenazimTrio/HG002_NA24385_son/NIST_HiSeq_HG002_Homogeneity-10953946/HG002_HiSeq300x_fastq/140613_D00360_0026_AHA2RRADXX/Project_RM8391_RM8392/Sample_2L1/2L1_CTTGTA_L002_R1_002.fastq.gz	Illumina WGS	HG002	Benchmark PSVGT on short reads
HG002	ftp://ftp-trace.ncbi.nlm.nih.gov/ReferenceSamples/giab/data/AshkenazimTrio/HG002_NA24385_son/NIST_HiSeq_HG002_Homogeneity-10953946/HG002_HiSeq300x_fastq/140613_D00360_0026_AHA2RRADXX/Project_RM8391_RM8392/Sample_2L1/2L1_CTTGTA_L002_R1_003.fastq.gz	Illumina WGS	HG002	Benchmark PSVGT on short reads
HG002	ftp://ftp-trace.ncbi.nlm.nih.gov/ReferenceSamples/giab/data/AshkenazimTrio/HG002_NA24385_son/NIST_HiSeq_HG002_Homogeneity-10953946/HG002_HiSeq300x_fastq/140613_D00360_0026_AHA2RRADXX/Project_RM8391_RM8392/Sample_2L1/2L1_CTTGTA_L002_R1_004.fastq.gz	Illumina WGS	HG002	Benchmark PSVGT on short reads
HG002	ftp://ftp-trace.ncbi.nlm.nih.gov/ReferenceSamples/giab/data/AshkenazimTrio/HG002_NA24385_son/NIST_HiSeq_HG002_Homogeneity-10953946/HG002_HiSeq300x_fastq/140613_D00360_0026_AHA2RRADXX/Project_RM8391_RM8392/Sample_2L1/2L1_CTTGTA_L002_R1_005.fastq.gz	Illumina WGS	HG002	Benchmark PSVGT on short reads
HG002	ftp://ftp-trace.ncbi.nlm.nih.gov/ReferenceSamples/giab/data/AshkenazimTrio/HG002_NA24385_son/NIST_HiSeq_HG002_Homogeneity-10953946/HG002_HiSeq300x_fastq/140613_D00360_0026_AHA2RRADXX/Project_RM8391_RM8392/Sample_2L1/2L1_CTTGTA_L002_R1_006.fastq.gz	Illumina WGS	HG002	Benchmark PSVGT on short reads
HG002	ftp://ftp-trace.ncbi.nlm.nih.gov/ReferenceSamples/giab/data/AshkenazimTrio/HG002_NA24385_son/NIST_HiSeq_HG002_Homogeneity-10953946/HG002_HiSeq300x_fastq/140613_D00360_0026_AHA2RRADXX/Project_RM8391_RM8392/Sample_2L2/2L2_GTGAAA_L001_R1_001.fastq.gz	Illumina WGS	HG002	Benchmark PSVGT on short reads
HG002	ftp://ftp-trace.ncbi.nlm.nih.gov/ReferenceSamples/giab/data/AshkenazimTrio/HG002_NA24385_son/NIST_HiSeq_HG002_Homogeneity-10953946/HG002_HiSeq300x_fastq/140613_D00360_0026_AHA2RRADXX/Project_RM8391_RM8392/Sample_2L2/2L2_GTGAAA_L001_R1_002.fastq.gz	Illumina WGS	HG002	Benchmark PSVGT on short reads
HG002	ftp://ftp-trace.ncbi.nlm.nih.gov/ReferenceSamples/giab/data/AshkenazimTrio/HG002_NA24385_son/NIST_HiSeq_HG002_Homogeneity-10953946/HG002_HiSeq300x_fastq/140613_D00360_0026_AHA2RRADXX/Project_RM8391_RM8392/Sample_2L2/2L2_GTGAAA_L001_R1_003.fastq.gz	Illumina WGS	HG002	Benchmark PSVGT on short reads
HG002	ftp://ftp-trace.ncbi.nlm.nih.gov/ReferenceSamples/giab/data/AshkenazimTrio/HG002_NA24385_son/NIST_HiSeq_HG002_Homogeneity-10953946/HG002_HiSeq300x_fastq/140613_D00360_0026_AHA2RRADXX/Project_RM8391_RM8392/Sample_2L2/2L2_GTGAAA_L001_R1_004.fastq.gz	Illumina WGS	HG002	Benchmark PSVGT on short reads
HG002	ftp://ftp-trace.ncbi.nlm.nih.gov/ReferenceSamples/giab/data/AshkenazimTrio/HG002_NA24385_son/NIST_HiSeq_HG002_Homogeneity-10953946/HG002_HiSeq300x_fastq/140613_D00360_0026_AHA2RRADXX/Project_RM8391_RM8392/Sample_2L2/2L2_GTGAAA_L001_R1_005.fastq.gz	Illumina WGS	HG002	Benchmark PSVGT on short reads
HG002	ftp://ftp-trace.ncbi.nlm.nih.gov/ReferenceSamples/giab/data/AshkenazimTrio/HG002_NA24385_son/NIST_HiSeq_HG002_Homogeneity-10953946/HG002_HiSeq300x_fastq/140613_D00360_0026_AHA2RRADXX/Project_RM8391_RM8392/Sample_2L2/2L2_GTGAAA_L001_R1_006.fastq.gz	Illumina WGS	HG002	Benchmark PSVGT on short reads
HG002	ftp://ftp-trace.ncbi.nlm.nih.gov/ReferenceSamples/giab/data/AshkenazimTrio/HG002_NA24385_son/NIST_HiSeq_HG002_Homogeneity-10953946/HG002_HiSeq300x_fastq/140613_D00360_0026_AHA2RRADXX/Project_RM8391_RM8392/Sample_2L2/2L2_GTGAAA_L002_R1_001.fastq.gz	Illumina WGS	HG002	Benchmark PSVGT on short reads
HG002	ftp://ftp-trace.ncbi.nlm.nih.gov/ReferenceSamples/giab/data/AshkenazimTrio/HG002_NA24385_son/NIST_HiSeq_HG002_Homogeneity-10953946/HG002_HiSeq300x_fastq/140613_D00360_0026_AHA2RRADXX/Project_RM8391_RM8392/Sample_2L2/2L2_GTGAAA_L002_R1_002.fastq.gz	Illumina WGS	HG002	Benchmark PSVGT on short reads
HG002	ftp://ftp-trace.ncbi.nlm.nih.gov/ReferenceSamples/giab/data/AshkenazimTrio/HG002_NA24385_son/NIST_HiSeq_HG002_Homogeneity-10953946/HG002_HiSeq300x_fastq/140613_D00360_0026_AHA2RRADXX/Project_RM8391_RM8392/Sample_2L2/2L2_GTGAAA_L002_R1_003.fastq.gz	Illumina WGS	HG002	Benchmark PSVGT on short reads
HG002	ftp://ftp-trace.ncbi.nlm.nih.gov/ReferenceSamples/giab/data/AshkenazimTrio/HG002_NA24385_son/NIST_HiSeq_HG002_Homogeneity-10953946/HG002_HiSeq300x_fastq/140613_D00360_0026_AHA2RRADXX/Project_RM8391_RM8392/Sample_2L2/2L2_GTGAAA_L002_R1_004.fastq.gz	Illumina WGS	HG002	Benchmark PSVGT on short reads
HG002	ftp://ftp-trace.ncbi.nlm.nih.gov/ReferenceSamples/giab/data/AshkenazimTrio/HG002_NA24385_son/NIST_HiSeq_HG002_Homogeneity-10953946/HG002_HiSeq300x_fastq/140613_D00360_0026_AHA2RRADXX/Project_RM8391_RM8392/Sample_2L2/2L2_GTGAAA_L002_R1_005.fastq.gz	Illumina WGS	HG002	Benchmark PSVGT on short reads
HG002	ftp://ftp-trace.ncbi.nlm.nih.gov/ReferenceSamples/giab/data/AshkenazimTrio/HG002_NA24385_son/NIST_HiSeq_HG002_Homogeneity-10953946/HG002_HiSeq300x_fastq/140613_D00360_0026_AHA2RRADXX/Project_RM8391_RM8392/Sample_2L2/2L2_GTGAAA_L002_R1_006.fastq.gz	Illumina WGS	HG002	Benchmark PSVGT on short reads
HG002	ftp://ftp-trace.ncbi.nlm.nih.gov/ReferenceSamples/giab/data/AshkenazimTrio/HG002_NA24385_son/NIST_HiSeq_HG002_Homogeneity-10953946/HG002_HiSeq300x_fastq/140613_D00360_0027_BHA2TEADXX/Project_RM8391_RM8392/Sample_2A1/2A1_CGATGT_L001_R1_001.fastq.gz	Illumina WGS	HG002	Benchmark PSVGT on short reads
HG002	ftp://ftp-trace.ncbi.nlm.nih.gov/ReferenceSamples/giab/data/AshkenazimTrio/HG002_NA24385_son/NIST_HiSeq_HG002_Homogeneity-10953946/HG002_HiSeq300x_fastq/140613_D00360_0027_BHA2TEADXX/Project_RM8391_RM8392/Sample_2A1/2A1_CGATGT_L001_R1_002.fastq.gz	Illumina WGS	HG002	Benchmark PSVGT on short reads
HG002	ftp://ftp-trace.ncbi.nlm.nih.gov/ReferenceSamples/giab/data/AshkenazimTrio/HG002_NA24385_son/NIST_HiSeq_HG002_Homogeneity-10953946/HG002_HiSeq300x_fastq/140613_D00360_0027_BHA2TEADXX/Project_RM8391_RM8392/Sample_2A1/2A1_CGATGT_L002_R1_001.fastq.gz	Illumina WGS	HG002	Benchmark PSVGT on short reads
HG002	ftp://ftp-trace.ncbi.nlm.nih.gov/ReferenceSamples/giab/data/AshkenazimTrio/HG002_NA24385_son/NIST_HiSeq_HG002_Homogeneity-10953946/HG002_HiSeq300x_fastq/140613_D00360_0027_BHA2TEADXX/Project_RM8391_RM8392/Sample_2A1/2A1_CGATGT_L002_R1_002.fastq.gz	Illumina WGS	HG002	Benchmark PSVGT on short reads
HG002	ftp://ftp-trace.ncbi.nlm.nih.gov/ReferenceSamples/giab/data/AshkenazimTrio/HG002_NA24385_son/NIST_HiSeq_HG002_Homogeneity-10953946/HG002_HiSeq300x_fastq/140613_D00360_0027_BHA2TEADXX/Project_RM8391_RM8392/Sample_2A2/2A2_TGACCA_L001_R1_001.fastq.gz	Illumina WGS	HG002	Benchmark PSVGT on short reads
HG002	ftp://ftp-trace.ncbi.nlm.nih.gov/ReferenceSamples/giab/data/AshkenazimTrio/HG002_NA24385_son/NIST_HiSeq_HG002_Homogeneity-10953946/HG002_HiSeq300x_fastq/140613_D00360_0027_BHA2TEADXX/Project_RM8391_RM8392/Sample_2A2/2A2_TGACCA_L001_R1_002.fastq.gz	Illumina WGS	HG002	Benchmark PSVGT on short reads
HG002	ftp://ftp-trace.ncbi.nlm.nih.gov/ReferenceSamples/giab/data/AshkenazimTrio/HG002_NA24385_son/NIST_HiSeq_HG002_Homogeneity-10953946/HG002_HiSeq300x_fastq/140613_D00360_0027_BHA2TEADXX/Project_RM8391_RM8392/Sample_2A2/2A2_TGACCA_L002_R1_001.fastq.gz	Illumina WGS	HG002	Benchmark PSVGT on short reads
HG002	ftp://ftp-trace.ncbi.nlm.nih.gov/ReferenceSamples/giab/data/AshkenazimTrio/HG002_NA24385_son/NIST_HiSeq_HG002_Homogeneity-10953946/HG002_HiSeq300x_fastq/140613_D00360_0027_BHA2TEADXX/Project_RM8391_RM8392/Sample_2A2/2A2_TGACCA_L002_R1_002.fastq.gz	Illumina WGS	HG002	Benchmark PSVGT on short reads
HG002	ftp://ftp-trace.ncbi.nlm.nih.gov/ReferenceSamples/giab/data/AshkenazimTrio/HG002_NA24385_son/NIST_HiSeq_HG002_Homogeneity-10953946/HG002_HiSeq300x_fastq/140613_D00360_0027_BHA2TEADXX/Project_RM8391_RM8392/Sample_2B1/2B1_CAGATC_L001_R1_001.fastq.gz	Illumina WGS	HG002	Benchmark PSVGT on short reads
HG002	ftp://ftp-trace.ncbi.nlm.nih.gov/ReferenceSamples/giab/data/AshkenazimTrio/HG002_NA24385_son/NIST_HiSeq_HG002_Homogeneity-10953946/HG002_HiSeq300x_fastq/140613_D00360_0027_BHA2TEADXX/Project_RM8391_RM8392/Sample_2B1/2B1_CAGATC_L001_R1_002.fastq.gz	Illumina WGS	HG002	Benchmark PSVGT on short reads
HG002	ftp://ftp-trace.ncbi.nlm.nih.gov/ReferenceSamples/giab/data/AshkenazimTrio/HG002_NA24385_son/NIST_HiSeq_HG002_Homogeneity-10953946/HG002_HiSeq300x_fastq/140613_D00360_0027_BHA2TEADXX/Project_RM8391_RM8392/Sample_2B1/2B1_CAGATC_L002_R1_001.fastq.gz	Illumina WGS	HG002	Benchmark PSVGT on short reads
HG002	ftp://ftp-trace.ncbi.nlm.nih.gov/ReferenceSamples/giab/data/AshkenazimTrio/HG002_NA24385_son/NIST_HiSeq_HG002_Homogeneity-10953946/HG002_HiSeq300x_fastq/140613_D00360_0027_BHA2TEADXX/Project_RM8391_RM8392/Sample_2B1/2B1_CAGATC_L002_R1_002.fastq.gz	Illumina WGS	HG002	Benchmark PSVGT on short reads
HG002	ftp://ftp-trace.ncbi.nlm.nih.gov/ReferenceSamples/giab/data/AshkenazimTrio/HG002_NA24385_son/NIST_HiSeq_HG002_Homogeneity-10953946/HG002_HiSeq300x_fastq/140613_D00360_0027_BHA2TEADXX/Project_RM8391_RM8392/Sample_2B2/2B2_CCGTCC_L001_R1_001.fastq.gz	Illumina WGS	HG002	Benchmark PSVGT on short reads
HG002	ftp://ftp-trace.ncbi.nlm.nih.gov/ReferenceSamples/giab/data/AshkenazimTrio/HG002_NA24385_son/NIST_HiSeq_HG002_Homogeneity-10953946/HG002_HiSeq300x_fastq/140613_D00360_0027_BHA2TEADXX/Project_RM8391_RM8392/Sample_2B2/2B2_CCGTCC_L001_R1_002.fastq.gz	Illumina WGS	HG002	Benchmark PSVGT on short reads
HG002	ftp://ftp-trace.ncbi.nlm.nih.gov/ReferenceSamples/giab/data/AshkenazimTrio/HG002_NA24385_son/NIST_HiSeq_HG002_Homogeneity-10953946/HG002_HiSeq300x_fastq/140613_D00360_0027_BHA2TEADXX/Project_RM8391_RM8392/Sample_2B2/2B2_CCGTCC_L002_R1_001.fastq.gz	Illumina WGS	HG002	Benchmark PSVGT on short reads
HG002	ftp://ftp-trace.ncbi.nlm.nih.gov/ReferenceSamples/giab/data/AshkenazimTrio/HG002_NA24385_son/NIST_HiSeq_HG002_Homogeneity-10953946/HG002_HiSeq300x_fastq/140613_D00360_0027_BHA2TEADXX/Project_RM8391_RM8392/Sample_2B2/2B2_CCGTCC_L002_R1_002.fastq.gz	Illumina WGS	HG002	Benchmark PSVGT on short reads
HG002	ftp://ftp-trace.ncbi.nlm.nih.gov/ReferenceSamples/giab/data/AshkenazimTrio/HG002_NA24385_son/NIST_HiSeq_HG002_Homogeneity-10953946/HG002_HiSeq300x_fastq/140613_D00360_0027_BHA2TEADXX/Project_RM8391_RM8392/Sample_2C1/2C1_AGTCAA_L001_R1_001.fastq.gz	Illumina WGS	HG002	Benchmark PSVGT on short reads
HG002	ftp://ftp-trace.ncbi.nlm.nih.gov/ReferenceSamples/giab/data/AshkenazimTrio/HG002_NA24385_son/NIST_HiSeq_HG002_Homogeneity-10953946/HG002_HiSeq300x_fastq/140613_D00360_0027_BHA2TEADXX/Project_RM8391_RM8392/Sample_2C1/2C1_AGTCAA_L001_R1_002.fastq.gz	Illumina WGS	HG002	Benchmark PSVGT on short reads
HG002	ftp://ftp-trace.ncbi.nlm.nih.gov/ReferenceSamples/giab/data/AshkenazimTrio/HG002_NA24385_son/NIST_HiSeq_HG002_Homogeneity-10953946/HG002_HiSeq300x_fastq/140613_D00360_0027_BHA2TEADXX/Project_RM8391_RM8392/Sample_2C1/2C1_AGTCAA_L002_R1_001.fastq.gz	Illumina WGS	HG002	Benchmark PSVGT on short reads
HG002	ftp://ftp-trace.ncbi.nlm.nih.gov/ReferenceSamples/giab/data/AshkenazimTrio/HG002_NA24385_son/NIST_HiSeq_HG002_Homogeneity-10953946/HG002_HiSeq300x_fastq/140613_D00360_0027_BHA2TEADXX/Project_RM8391_RM8392/Sample_2C1/2C1_AGTCAA_L002_R1_002.fastq.gz	Illumina WGS	HG002	Benchmark PSVGT on short reads
HG002	ftp://ftp-trace.ncbi.nlm.nih.gov/ReferenceSamples/giab/data/AshkenazimTrio/HG002_NA24385_son/NIST_HiSeq_HG002_Homogeneity-10953946/HG002_HiSeq300x_fastq/140613_D00360_0027_BHA2TEADXX/Project_RM8391_RM8392/Sample_2C2/2C2_AGTTCC_L001_R1_001.fastq.gz	Illumina WGS	HG002	Benchmark PSVGT on short reads
HG002	ftp://ftp-trace.ncbi.nlm.nih.gov/ReferenceSamples/giab/data/AshkenazimTrio/HG002_NA24385_son/NIST_HiSeq_HG002_Homogeneity-10953946/HG002_HiSeq300x_fastq/140613_D00360_0027_BHA2TEADXX/Project_RM8391_RM8392/Sample_2C2/2C2_AGTTCC_L001_R1_002.fastq.gz	Illumina WGS	HG002	Benchmark PSVGT on short reads
HG002	ftp://ftp-trace.ncbi.nlm.nih.gov/ReferenceSamples/giab/data/AshkenazimTrio/HG002_NA24385_son/NIST_HiSeq_HG002_Homogeneity-10953946/HG002_HiSeq300x_fastq/140613_D00360_0027_BHA2TEADXX/Project_RM8391_RM8392/Sample_2C2/2C2_AGTTCC_L002_R1_001.fastq.gz	Illumina WGS	HG002	Benchmark PSVGT on short reads
HG002	ftp://ftp-trace.ncbi.nlm.nih.gov/ReferenceSamples/giab/data/AshkenazimTrio/HG002_NA24385_son/NIST_HiSeq_HG002_Homogeneity-10953946/HG002_HiSeq300x_fastq/140613_D00360_0027_BHA2TEADXX/Project_RM8391_RM8392/Sample_2C2/2C2_AGTTCC_L002_R1_002.fastq.gz	Illumina WGS	HG002	Benchmark PSVGT on short reads
HG002	ftp://ftp-trace.ncbi.nlm.nih.gov/ReferenceSamples/giab/data/AshkenazimTrio/HG002_NA24385_son/NIST_HiSeq_HG002_Homogeneity-10953946/HG002_HiSeq300x_fastq/140613_D00360_0027_BHA2TEADXX/Project_RM8391_RM8392/Sample_2D1/2D1_ATGTCA_L001_R1_001.fastq.gz	Illumina WGS	HG002	Benchmark PSVGT on short reads
HG002	ftp://ftp-trace.ncbi.nlm.nih.gov/ReferenceSamples/giab/data/AshkenazimTrio/HG002_NA24385_son/NIST_HiSeq_HG002_Homogeneity-10953946/HG002_HiSeq300x_fastq/140613_D00360_0027_BHA2TEADXX/Project_RM8391_RM8392/Sample_2D1/2D1_ATGTCA_L001_R1_002.fastq.gz	Illumina WGS	HG002	Benchmark PSVGT on short reads
HG002	ftp://ftp-trace.ncbi.nlm.nih.gov/ReferenceSamples/giab/data/AshkenazimTrio/HG002_NA24385_son/NIST_HiSeq_HG002_Homogeneity-10953946/HG002_HiSeq300x_fastq/140613_D00360_0027_BHA2TEADXX/Project_RM8391_RM8392/Sample_2D1/2D1_ATGTCA_L002_R1_001.fastq.gz	Illumina WGS	HG002	Benchmark PSVGT on short reads
HG002	ftp://ftp-trace.ncbi.nlm.nih.gov/ReferenceSamples/giab/data/AshkenazimTrio/HG002_NA24385_son/NIST_HiSeq_HG002_Homogeneity-10953946/HG002_HiSeq300x_fastq/140613_D00360_0027_BHA2TEADXX/Project_RM8391_RM8392/Sample_2D1/2D1_ATGTCA_L002_R1_002.fastq.gz	Illumina WGS	HG002	Benchmark PSVGT on short reads
HG002	ftp://ftp-trace.ncbi.nlm.nih.gov/ReferenceSamples/giab/data/AshkenazimTrio/HG002_NA24385_son/NIST_HiSeq_HG002_Homogeneity-10953946/HG002_HiSeq300x_fastq/140613_D00360_0027_BHA2TEADXX/Project_RM8391_RM8392/Sample_2D2/2D2_GTCCGC_L001_R1_001.fastq.gz	Illumina WGS	HG002	Benchmark PSVGT on short reads
HG002	ftp://ftp-trace.ncbi.nlm.nih.gov/ReferenceSamples/giab/data/AshkenazimTrio/HG002_NA24385_son/NIST_HiSeq_HG002_Homogeneity-10953946/HG002_HiSeq300x_fastq/140613_D00360_0027_BHA2TEADXX/Project_RM8391_RM8392/Sample_2D2/2D2_GTCCGC_L001_R1_002.fastq.gz	Illumina WGS	HG002	Benchmark PSVGT on short reads
HG002	ftp://ftp-trace.ncbi.nlm.nih.gov/ReferenceSamples/giab/data/AshkenazimTrio/HG002_NA24385_son/NIST_HiSeq_HG002_Homogeneity-10953946/HG002_HiSeq300x_fastq/140613_D00360_0027_BHA2TEADXX/Project_RM8391_RM8392/Sample_2D2/2D2_GTCCGC_L002_R1_001.fastq.gz	Illumina WGS	HG002	Benchmark PSVGT on short reads
HG002	ftp://ftp-trace.ncbi.nlm.nih.gov/ReferenceSamples/giab/data/AshkenazimTrio/HG002_NA24385_son/NIST_HiSeq_HG002_Homogeneity-10953946/HG002_HiSeq300x_fastq/140613_D00360_0027_BHA2TEADXX/Project_RM8391_RM8392/Sample_2D2/2D2_GTCCGC_L002_R1_002.fastq.gz	Illumina WGS	HG002	Benchmark PSVGT on short reads
HG002	ftp://ftp-trace.ncbi.nlm.nih.gov/ReferenceSamples/giab/data/AshkenazimTrio/HG002_NA24385_son/NIST_HiSeq_HG002_Homogeneity-10953946/HG002_HiSeq300x_fastq/140613_D00360_0027_BHA2TEADXX/Project_RM8391_RM8392/Sample_2F1/2F1_ACAGTG_L001_R1_001.fastq.gz	Illumina WGS	HG002	Benchmark PSVGT on short reads
HG002	ftp://ftp-trace.ncbi.nlm.nih.gov/ReferenceSamples/giab/data/AshkenazimTrio/HG002_NA24385_son/NIST_HiSeq_HG002_Homogeneity-10953946/HG002_HiSeq300x_fastq/140613_D00360_0027_BHA2TEADXX/Project_RM8391_RM8392/Sample_2F1/2F1_ACAGTG_L001_R1_002.fastq.gz	Illumina WGS	HG002	Benchmark PSVGT on short reads
HG002	ftp://ftp-trace.ncbi.nlm.nih.gov/ReferenceSamples/giab/data/AshkenazimTrio/HG002_NA24385_son/NIST_HiSeq_HG002_Homogeneity-10953946/HG002_HiSeq300x_fastq/140613_D00360_0027_BHA2TEADXX/Project_RM8391_RM8392/Sample_2F1/2F1_ACAGTG_L001_R1_003.fastq.gz	Illumina WGS	HG002	Benchmark PSVGT on short reads
HG002	ftp://ftp-trace.ncbi.nlm.nih.gov/ReferenceSamples/giab/data/AshkenazimTrio/HG002_NA24385_son/NIST_HiSeq_HG002_Homogeneity-10953946/HG002_HiSeq300x_fastq/140613_D00360_0027_BHA2TEADXX/Project_RM8391_RM8392/Sample_2F1/2F1_ACAGTG_L001_R1_004.fastq.gz	Illumina WGS	HG002	Benchmark PSVGT on short reads
HG002	ftp://ftp-trace.ncbi.nlm.nih.gov/ReferenceSamples/giab/data/AshkenazimTrio/HG002_NA24385_son/NIST_HiSeq_HG002_Homogeneity-10953946/HG002_HiSeq300x_fastq/140613_D00360_0027_BHA2TEADXX/Project_RM8391_RM8392/Sample_2F1/2F1_ACAGTG_L001_R1_005.fastq.gz	Illumina WGS	HG002	Benchmark PSVGT on short reads
HG002	ftp://ftp-trace.ncbi.nlm.nih.gov/ReferenceSamples/giab/data/AshkenazimTrio/HG002_NA24385_son/NIST_HiSeq_HG002_Homogeneity-10953946/HG002_HiSeq300x_fastq/140613_D00360_0027_BHA2TEADXX/Project_RM8391_RM8392/Sample_2F1/2F1_ACAGTG_L001_R1_006.fastq.gz	Illumina WGS	HG002	Benchmark PSVGT on short reads
HG002	ftp://ftp-trace.ncbi.nlm.nih.gov/ReferenceSamples/giab/data/AshkenazimTrio/HG002_NA24385_son/NIST_HiSeq_HG002_Homogeneity-10953946/HG002_HiSeq300x_fastq/140613_D00360_0027_BHA2TEADXX/Project_RM8391_RM8392/Sample_2F1/2F1_ACAGTG_L002_R1_001.fastq.gz	Illumina WGS	HG002	Benchmark PSVGT on short reads
HG002	ftp://ftp-trace.ncbi.nlm.nih.gov/ReferenceSamples/giab/data/AshkenazimTrio/HG002_NA24385_son/NIST_HiSeq_HG002_Homogeneity-10953946/HG002_HiSeq300x_fastq/140613_D00360_0027_BHA2TEADXX/Project_RM8391_RM8392/Sample_2F1/2F1_ACAGTG_L002_R1_002.fastq.gz	Illumina WGS	HG002	Benchmark PSVGT on short reads
HG002	ftp://ftp-trace.ncbi.nlm.nih.gov/ReferenceSamples/giab/data/AshkenazimTrio/HG002_NA24385_son/NIST_HiSeq_HG002_Homogeneity-10953946/HG002_HiSeq300x_fastq/140613_D00360_0027_BHA2TEADXX/Project_RM8391_RM8392/Sample_2F1/2F1_ACAGTG_L002_R1_003.fastq.gz	Illumina WGS	HG002	Benchmark PSVGT on short reads
HG002	ftp://ftp-trace.ncbi.nlm.nih.gov/ReferenceSamples/giab/data/AshkenazimTrio/HG002_NA24385_son/NIST_HiSeq_HG002_Homogeneity-10953946/HG002_HiSeq300x_fastq/140613_D00360_0027_BHA2TEADXX/Project_RM8391_RM8392/Sample_2F1/2F1_ACAGTG_L002_R1_004.fastq.gz	Illumina WGS	HG002	Benchmark PSVGT on short reads
HG002	ftp://ftp-trace.ncbi.nlm.nih.gov/ReferenceSamples/giab/data/AshkenazimTrio/HG002_NA24385_son/NIST_HiSeq_HG002_Homogeneity-10953946/HG002_HiSeq300x_fastq/140613_D00360_0027_BHA2TEADXX/Project_RM8391_RM8392/Sample_2F1/2F1_ACAGTG_L002_R1_005.fastq.gz	Illumina WGS	HG002	Benchmark PSVGT on short reads
HG002	ftp://ftp-trace.ncbi.nlm.nih.gov/ReferenceSamples/giab/data/AshkenazimTrio/HG002_NA24385_son/NIST_HiSeq_HG002_Homogeneity-10953946/HG002_HiSeq300x_fastq/140613_D00360_0027_BHA2TEADXX/Project_RM8391_RM8392/Sample_2F1/2F1_ACAGTG_L002_R1_006.fastq.gz	Illumina WGS	HG002	Benchmark PSVGT on short reads
HG002	ftp://ftp-trace.ncbi.nlm.nih.gov/ReferenceSamples/giab/data/AshkenazimTrio/HG002_NA24385_son/NIST_HiSeq_HG002_Homogeneity-10953946/HG002_HiSeq300x_fastq/140613_D00360_0027_BHA2TEADXX/Project_RM8391_RM8392/Sample_2F2/2F2_GCCAAT_L001_R1_001.fastq.gz	Illumina WGS	HG002	Benchmark PSVGT on short reads
HG002	ftp://ftp-trace.ncbi.nlm.nih.gov/ReferenceSamples/giab/data/AshkenazimTrio/HG002_NA24385_son/NIST_HiSeq_HG002_Homogeneity-10953946/HG002_HiSeq300x_fastq/140613_D00360_0027_BHA2TEADXX/Project_RM8391_RM8392/Sample_2F2/2F2_GCCAAT_L001_R1_002.fastq.gz	Illumina WGS	HG002	Benchmark PSVGT on short reads
HG002	ftp://ftp-trace.ncbi.nlm.nih.gov/ReferenceSamples/giab/data/AshkenazimTrio/HG002_NA24385_son/NIST_HiSeq_HG002_Homogeneity-10953946/HG002_HiSeq300x_fastq/140613_D00360_0027_BHA2TEADXX/Project_RM8391_RM8392/Sample_2F2/2F2_GCCAAT_L001_R1_003.fastq.gz	Illumina WGS	HG002	Benchmark PSVGT on short reads
HG002	ftp://ftp-trace.ncbi.nlm.nih.gov/ReferenceSamples/giab/data/AshkenazimTrio/HG002_NA24385_son/NIST_HiSeq_HG002_Homogeneity-10953946/HG002_HiSeq300x_fastq/140613_D00360_0027_BHA2TEADXX/Project_RM8391_RM8392/Sample_2F2/2F2_GCCAAT_L001_R1_004.fastq.gz	Illumina WGS	HG002	Benchmark PSVGT on short reads
HG002	ftp://ftp-trace.ncbi.nlm.nih.gov/ReferenceSamples/giab/data/AshkenazimTrio/HG002_NA24385_son/NIST_HiSeq_HG002_Homogeneity-10953946/HG002_HiSeq300x_fastq/140613_D00360_0027_BHA2TEADXX/Project_RM8391_RM8392/Sample_2F2/2F2_GCCAAT_L001_R1_005.fastq.gz	Illumina WGS	HG002	Benchmark PSVGT on short reads
HG002	ftp://ftp-trace.ncbi.nlm.nih.gov/ReferenceSamples/giab/data/AshkenazimTrio/HG002_NA24385_son/NIST_HiSeq_HG002_Homogeneity-10953946/HG002_HiSeq300x_fastq/140613_D00360_0027_BHA2TEADXX/Project_RM8391_RM8392/Sample_2F2/2F2_GCCAAT_L001_R1_006.fastq.gz	Illumina WGS	HG002	Benchmark PSVGT on short reads
HG002	ftp://ftp-trace.ncbi.nlm.nih.gov/ReferenceSamples/giab/data/AshkenazimTrio/HG002_NA24385_son/NIST_HiSeq_HG002_Homogeneity-10953946/HG002_HiSeq300x_fastq/140613_D00360_0027_BHA2TEADXX/Project_RM8391_RM8392/Sample_2F2/2F2_GCCAAT_L002_R1_001.fastq.gz	Illumina WGS	HG002	Benchmark PSVGT on short reads
HG002	ftp://ftp-trace.ncbi.nlm.nih.gov/ReferenceSamples/giab/data/AshkenazimTrio/HG002_NA24385_son/NIST_HiSeq_HG002_Homogeneity-10953946/HG002_HiSeq300x_fastq/140613_D00360_0027_BHA2TEADXX/Project_RM8391_RM8392/Sample_2F2/2F2_GCCAAT_L002_R1_002.fastq.gz	Illumina WGS	HG002	Benchmark PSVGT on short reads
HG002	ftp://ftp-trace.ncbi.nlm.nih.gov/ReferenceSamples/giab/data/AshkenazimTrio/HG002_NA24385_son/NIST_HiSeq_HG002_Homogeneity-10953946/HG002_HiSeq300x_fastq/140613_D00360_0027_BHA2TEADXX/Project_RM8391_RM8392/Sample_2F2/2F2_GCCAAT_L002_R1_003.fastq.gz	Illumina WGS	HG002	Benchmark PSVGT on short reads
HG002	ftp://ftp-trace.ncbi.nlm.nih.gov/ReferenceSamples/giab/data/AshkenazimTrio/HG002_NA24385_son/NIST_HiSeq_HG002_Homogeneity-10953946/HG002_HiSeq300x_fastq/140613_D00360_0027_BHA2TEADXX/Project_RM8391_RM8392/Sample_2F2/2F2_GCCAAT_L002_R1_004.fastq.gz	Illumina WGS	HG002	Benchmark PSVGT on short reads
HG002	ftp://ftp-trace.ncbi.nlm.nih.gov/ReferenceSamples/giab/data/AshkenazimTrio/HG002_NA24385_son/NIST_HiSeq_HG002_Homogeneity-10953946/HG002_HiSeq300x_fastq/140613_D00360_0027_BHA2TEADXX/Project_RM8391_RM8392/Sample_2F2/2F2_GCCAAT_L002_R1_005.fastq.gz	Illumina WGS	HG002	Benchmark PSVGT on short reads
HG002	ftp://ftp-trace.ncbi.nlm.nih.gov/ReferenceSamples/giab/data/AshkenazimTrio/HG002_NA24385_son/NIST_HiSeq_HG002_Homogeneity-10953946/HG002_HiSeq300x_fastq/140613_D00360_0027_BHA2TEADXX/Project_RM8391_RM8392/Sample_2F2/2F2_GCCAAT_L002_R1_006.fastq.gz	Illumina WGS	HG002	Benchmark PSVGT on short reads
HG002	ftp://ftp-trace.ncbi.nlm.nih.gov/ReferenceSamples/giab/data/AshkenazimTrio/HG002_NA24385_son/NIST_HiSeq_HG002_Homogeneity-10953946/HG002_HiSeq300x_fastq/140613_D00360_0027_BHA2TEADXX/Project_RM8391_RM8392/Sample_2L1/2L1_CTTGTA_L001_R1_001.fastq.gz	Illumina WGS	HG002	Benchmark PSVGT on short reads
HG002	ftp://ftp-trace.ncbi.nlm.nih.gov/ReferenceSamples/giab/data/AshkenazimTrio/HG002_NA24385_son/NIST_HiSeq_HG002_Homogeneity-10953946/HG002_HiSeq300x_fastq/140613_D00360_0027_BHA2TEADXX/Project_RM8391_RM8392/Sample_2L1/2L1_CTTGTA_L001_R1_002.fastq.gz	Illumina WGS	HG002	Benchmark PSVGT on short reads
HG002	ftp://ftp-trace.ncbi.nlm.nih.gov/ReferenceSamples/giab/data/AshkenazimTrio/HG002_NA24385_son/NIST_HiSeq_HG002_Homogeneity-10953946/HG002_HiSeq300x_fastq/140613_D00360_0027_BHA2TEADXX/Project_RM8391_RM8392/Sample_2L1/2L1_CTTGTA_L001_R1_003.fastq.gz	Illumina WGS	HG002	Benchmark PSVGT on short reads
HG002	ftp://ftp-trace.ncbi.nlm.nih.gov/ReferenceSamples/giab/data/AshkenazimTrio/HG002_NA24385_son/NIST_HiSeq_HG002_Homogeneity-10953946/HG002_HiSeq300x_fastq/140613_D00360_0027_BHA2TEADXX/Project_RM8391_RM8392/Sample_2L1/2L1_CTTGTA_L001_R1_004.fastq.gz	Illumina WGS	HG002	Benchmark PSVGT on short reads
HG002	ftp://ftp-trace.ncbi.nlm.nih.gov/ReferenceSamples/giab/data/AshkenazimTrio/HG002_NA24385_son/NIST_HiSeq_HG002_Homogeneity-10953946/HG002_HiSeq300x_fastq/140613_D00360_0027_BHA2TEADXX/Project_RM8391_RM8392/Sample_2L1/2L1_CTTGTA_L001_R1_005.fastq.gz	Illumina WGS	HG002	Benchmark PSVGT on short reads
HG002	ftp://ftp-trace.ncbi.nlm.nih.gov/ReferenceSamples/giab/data/AshkenazimTrio/HG002_NA24385_son/NIST_HiSeq_HG002_Homogeneity-10953946/HG002_HiSeq300x_fastq/140613_D00360_0027_BHA2TEADXX/Project_RM8391_RM8392/Sample_2L1/2L1_CTTGTA_L001_R1_006.fastq.gz	Illumina WGS	HG002	Benchmark PSVGT on short reads
HG002	ftp://ftp-trace.ncbi.nlm.nih.gov/ReferenceSamples/giab/data/AshkenazimTrio/HG002_NA24385_son/NIST_HiSeq_HG002_Homogeneity-10953946/HG002_HiSeq300x_fastq/140613_D00360_0027_BHA2TEADXX/Project_RM8391_RM8392/Sample_2L1/2L1_CTTGTA_L002_R1_001.fastq.gz	Illumina WGS	HG002	Benchmark PSVGT on short reads
HG002	ftp://ftp-trace.ncbi.nlm.nih.gov/ReferenceSamples/giab/data/AshkenazimTrio/HG002_NA24385_son/NIST_HiSeq_HG002_Homogeneity-10953946/HG002_HiSeq300x_fastq/140613_D00360_0027_BHA2TEADXX/Project_RM8391_RM8392/Sample_2L1/2L1_CTTGTA_L002_R1_002.fastq.gz	Illumina WGS	HG002	Benchmark PSVGT on short reads
HG002	ftp://ftp-trace.ncbi.nlm.nih.gov/ReferenceSamples/giab/data/AshkenazimTrio/HG002_NA24385_son/NIST_HiSeq_HG002_Homogeneity-10953946/HG002_HiSeq300x_fastq/140613_D00360_0027_BHA2TEADXX/Project_RM8391_RM8392/Sample_2L1/2L1_CTTGTA_L002_R1_003.fastq.gz	Illumina WGS	HG002	Benchmark PSVGT on short reads
HG002	ftp://ftp-trace.ncbi.nlm.nih.gov/ReferenceSamples/giab/data/AshkenazimTrio/HG002_NA24385_son/NIST_HiSeq_HG002_Homogeneity-10953946/HG002_HiSeq300x_fastq/140613_D00360_0027_BHA2TEADXX/Project_RM8391_RM8392/Sample_2L1/2L1_CTTGTA_L002_R1_004.fastq.gz	Illumina WGS	HG002	Benchmark PSVGT on short reads
HG002	ftp://ftp-trace.ncbi.nlm.nih.gov/ReferenceSamples/giab/data/AshkenazimTrio/HG002_NA24385_son/NIST_HiSeq_HG002_Homogeneity-10953946/HG002_HiSeq300x_fastq/140613_D00360_0027_BHA2TEADXX/Project_RM8391_RM8392/Sample_2L1/2L1_CTTGTA_L002_R1_005.fastq.gz	Illumina WGS	HG002	Benchmark PSVGT on short reads
HG002	ftp://ftp-trace.ncbi.nlm.nih.gov/ReferenceSamples/giab/data/AshkenazimTrio/HG002_NA24385_son/NIST_HiSeq_HG002_Homogeneity-10953946/HG002_HiSeq300x_fastq/140613_D00360_0027_BHA2TEADXX/Project_RM8391_RM8392/Sample_2L1/2L1_CTTGTA_L002_R1_006.fastq.gz	Illumina WGS	HG002	Benchmark PSVGT on short reads
HG002	ftp://ftp-trace.ncbi.nlm.nih.gov/ReferenceSamples/giab/data/AshkenazimTrio/HG002_NA24385_son/NIST_HiSeq_HG002_Homogeneity-10953946/HG002_HiSeq300x_fastq/140613_D00360_0027_BHA2TEADXX/Project_RM8391_RM8392/Sample_2L2/2L2_GTGAAA_L001_R1_001.fastq.gz	Illumina WGS	HG002	Benchmark PSVGT on short reads
HG002	ftp://ftp-trace.ncbi.nlm.nih.gov/ReferenceSamples/giab/data/AshkenazimTrio/HG002_NA24385_son/NIST_HiSeq_HG002_Homogeneity-10953946/HG002_HiSeq300x_fastq/140613_D00360_0027_BHA2TEADXX/Project_RM8391_RM8392/Sample_2L2/2L2_GTGAAA_L001_R1_002.fastq.gz	Illumina WGS	HG002	Benchmark PSVGT on short reads
HG002	ftp://ftp-trace.ncbi.nlm.nih.gov/ReferenceSamples/giab/data/AshkenazimTrio/HG002_NA24385_son/NIST_HiSeq_HG002_Homogeneity-10953946/HG002_HiSeq300x_fastq/140613_D00360_0027_BHA2TEADXX/Project_RM8391_RM8392/Sample_2L2/2L2_GTGAAA_L001_R1_003.fastq.gz	Illumina WGS	HG002	Benchmark PSVGT on short reads
HG002	ftp://ftp-trace.ncbi.nlm.nih.gov/ReferenceSamples/giab/data/AshkenazimTrio/HG002_NA24385_son/NIST_HiSeq_HG002_Homogeneity-10953946/HG002_HiSeq300x_fastq/140613_D00360_0027_BHA2TEADXX/Project_RM8391_RM8392/Sample_2L2/2L2_GTGAAA_L001_R1_004.fastq.gz	Illumina WGS	HG002	Benchmark PSVGT on short reads
HG002	ftp://ftp-trace.ncbi.nlm.nih.gov/ReferenceSamples/giab/data/AshkenazimTrio/HG002_NA24385_son/NIST_HiSeq_HG002_Homogeneity-10953946/HG002_HiSeq300x_fastq/140613_D00360_0027_BHA2TEADXX/Project_RM8391_RM8392/Sample_2L2/2L2_GTGAAA_L001_R1_005.fastq.gz	Illumina WGS	HG002	Benchmark PSVGT on short reads
HG002	ftp://ftp-trace.ncbi.nlm.nih.gov/ReferenceSamples/giab/data/AshkenazimTrio/HG002_NA24385_son/NIST_HiSeq_HG002_Homogeneity-10953946/HG002_HiSeq300x_fastq/140613_D00360_0027_BHA2TEADXX/Project_RM8391_RM8392/Sample_2L2/2L2_GTGAAA_L001_R1_006.fastq.gz	Illumina WGS	HG002	Benchmark PSVGT on short reads
HG002	ftp://ftp-trace.ncbi.nlm.nih.gov/ReferenceSamples/giab/data/AshkenazimTrio/HG002_NA24385_son/NIST_HiSeq_HG002_Homogeneity-10953946/HG002_HiSeq300x_fastq/140613_D00360_0027_BHA2TEADXX/Project_RM8391_RM8392/Sample_2L2/2L2_GTGAAA_L002_R1_001.fastq.gz	Illumina WGS	HG002	Benchmark PSVGT on short reads
HG002	ftp://ftp-trace.ncbi.nlm.nih.gov/ReferenceSamples/giab/data/AshkenazimTrio/HG002_NA24385_son/NIST_HiSeq_HG002_Homogeneity-10953946/HG002_HiSeq300x_fastq/140613_D00360_0027_BHA2TEADXX/Project_RM8391_RM8392/Sample_2L2/2L2_GTGAAA_L002_R1_002.fastq.gz	Illumina WGS	HG002	Benchmark PSVGT on short reads
HG002	ftp://ftp-trace.ncbi.nlm.nih.gov/ReferenceSamples/giab/data/AshkenazimTrio/HG002_NA24385_son/NIST_HiSeq_HG002_Homogeneity-10953946/HG002_HiSeq300x_fastq/140613_D00360_0027_BHA2TEADXX/Project_RM8391_RM8392/Sample_2L2/2L2_GTGAAA_L002_R1_003.fastq.gz	Illumina WGS	HG002	Benchmark PSVGT on short reads
HG002	ftp://ftp-trace.ncbi.nlm.nih.gov/ReferenceSamples/giab/data/AshkenazimTrio/HG002_NA24385_son/NIST_HiSeq_HG002_Homogeneity-10953946/HG002_HiSeq300x_fastq/140613_D00360_0027_BHA2TEADXX/Project_RM8391_RM8392/Sample_2L2/2L2_GTGAAA_L002_R1_004.fastq.gz	Illumina WGS	HG002	Benchmark PSVGT on short reads
HG002	ftp://ftp-trace.ncbi.nlm.nih.gov/ReferenceSamples/giab/data/AshkenazimTrio/HG002_NA24385_son/NIST_HiSeq_HG002_Homogeneity-10953946/HG002_HiSeq300x_fastq/140613_D00360_0027_BHA2TEADXX/Project_RM8391_RM8392/Sample_2L2/2L2_GTGAAA_L002_R1_005.fastq.gz	Illumina WGS	HG002	Benchmark PSVGT on short reads
HG002	ftp://ftp-trace.ncbi.nlm.nih.gov/ReferenceSamples/giab/data/AshkenazimTrio/HG002_NA24385_son/NIST_HiSeq_HG002_Homogeneity-10953946/HG002_HiSeq300x_fastq/140613_D00360_0027_BHA2TEADXX/Project_RM8391_RM8392/Sample_2L2/2L2_GTGAAA_L002_R1_006.fastq.gz	Illumina WGS	HG002	Benchmark PSVGT on short reads
HG002	ftp://ftp-trace.ncbi.nlm.nih.gov/ReferenceSamples/giab/data/AshkenazimTrio/HG002_NA24385_son/NIST_HiSeq_HG002_Homogeneity-10953946/HG002_HiSeq300x_fastq/140616_D00360_0028_AHA2RLADXX/Project_RM8391_RM8392/Sample_2A1/2A1_CGATGT_L001_R1_001.fastq.gz	Illumina WGS	HG002	Benchmark PSVGT on short reads
HG002	ftp://ftp-trace.ncbi.nlm.nih.gov/ReferenceSamples/giab/data/AshkenazimTrio/HG002_NA24385_son/NIST_HiSeq_HG002_Homogeneity-10953946/HG002_HiSeq300x_fastq/140616_D00360_0028_AHA2RLADXX/Project_RM8391_RM8392/Sample_2A1/2A1_CGATGT_L001_R1_002.fastq.gz	Illumina WGS	HG002	Benchmark PSVGT on short reads
HG002	ftp://ftp-trace.ncbi.nlm.nih.gov/ReferenceSamples/giab/data/AshkenazimTrio/HG002_NA24385_son/NIST_HiSeq_HG002_Homogeneity-10953946/HG002_HiSeq300x_fastq/140616_D00360_0028_AHA2RLADXX/Project_RM8391_RM8392/Sample_2A1/2A1_CGATGT_L002_R1_001.fastq.gz	Illumina WGS	HG002	Benchmark PSVGT on short reads
HG002	ftp://ftp-trace.ncbi.nlm.nih.gov/ReferenceSamples/giab/data/AshkenazimTrio/HG002_NA24385_son/NIST_HiSeq_HG002_Homogeneity-10953946/HG002_HiSeq300x_fastq/140616_D00360_0028_AHA2RLADXX/Project_RM8391_RM8392/Sample_2A1/2A1_CGATGT_L002_R1_002.fastq.gz	Illumina WGS	HG002	Benchmark PSVGT on short reads
HG002	ftp://ftp-trace.ncbi.nlm.nih.gov/ReferenceSamples/giab/data/AshkenazimTrio/HG002_NA24385_son/NIST_HiSeq_HG002_Homogeneity-10953946/HG002_HiSeq300x_fastq/140616_D00360_0028_AHA2RLADXX/Project_RM8391_RM8392/Sample_2A2/2A2_TGACCA_L001_R1_001.fastq.gz	Illumina WGS	HG002	Benchmark PSVGT on short reads
HG002	ftp://ftp-trace.ncbi.nlm.nih.gov/ReferenceSamples/giab/data/AshkenazimTrio/HG002_NA24385_son/NIST_HiSeq_HG002_Homogeneity-10953946/HG002_HiSeq300x_fastq/140616_D00360_0028_AHA2RLADXX/Project_RM8391_RM8392/Sample_2A2/2A2_TGACCA_L001_R1_002.fastq.gz	Illumina WGS	HG002	Benchmark PSVGT on short reads
HG002	ftp://ftp-trace.ncbi.nlm.nih.gov/ReferenceSamples/giab/data/AshkenazimTrio/HG002_NA24385_son/NIST_HiSeq_HG002_Homogeneity-10953946/HG002_HiSeq300x_fastq/140616_D00360_0028_AHA2RLADXX/Project_RM8391_RM8392/Sample_2A2/2A2_TGACCA_L002_R1_001.fastq.gz	Illumina WGS	HG002	Benchmark PSVGT on short reads
HG002	ftp://ftp-trace.ncbi.nlm.nih.gov/ReferenceSamples/giab/data/AshkenazimTrio/HG002_NA24385_son/NIST_HiSeq_HG002_Homogeneity-10953946/HG002_HiSeq300x_fastq/140616_D00360_0028_AHA2RLADXX/Project_RM8391_RM8392/Sample_2A2/2A2_TGACCA_L002_R1_002.fastq.gz	Illumina WGS	HG002	Benchmark PSVGT on short reads
HG002	ftp://ftp-trace.ncbi.nlm.nih.gov/ReferenceSamples/giab/data/AshkenazimTrio/HG002_NA24385_son/NIST_HiSeq_HG002_Homogeneity-10953946/HG002_HiSeq300x_fastq/140616_D00360_0028_AHA2RLADXX/Project_RM8391_RM8392/Sample_2B1/2B1_CAGATC_L001_R1_001.fastq.gz	Illumina WGS	HG002	Benchmark PSVGT on short reads
HG002	ftp://ftp-trace.ncbi.nlm.nih.gov/ReferenceSamples/giab/data/AshkenazimTrio/HG002_NA24385_son/NIST_HiSeq_HG002_Homogeneity-10953946/HG002_HiSeq300x_fastq/140616_D00360_0028_AHA2RLADXX/Project_RM8391_RM8392/Sample_2B1/2B1_CAGATC_L001_R1_002.fastq.gz	Illumina WGS	HG002	Benchmark PSVGT on short reads
HG002	ftp://ftp-trace.ncbi.nlm.nih.gov/ReferenceSamples/giab/data/AshkenazimTrio/HG002_NA24385_son/NIST_HiSeq_HG002_Homogeneity-10953946/HG002_HiSeq300x_fastq/140616_D00360_0028_AHA2RLADXX/Project_RM8391_RM8392/Sample_2B1/2B1_CAGATC_L002_R1_001.fastq.gz	Illumina WGS	HG002	Benchmark PSVGT on short reads
HG002	ftp://ftp-trace.ncbi.nlm.nih.gov/ReferenceSamples/giab/data/AshkenazimTrio/HG002_NA24385_son/NIST_HiSeq_HG002_Homogeneity-10953946/HG002_HiSeq300x_fastq/140616_D00360_0028_AHA2RLADXX/Project_RM8391_RM8392/Sample_2B1/2B1_CAGATC_L002_R1_002.fastq.gz	Illumina WGS	HG002	Benchmark PSVGT on short reads
HG002	ftp://ftp-trace.ncbi.nlm.nih.gov/ReferenceSamples/giab/data/AshkenazimTrio/HG002_NA24385_son/NIST_HiSeq_HG002_Homogeneity-10953946/HG002_HiSeq300x_fastq/140616_D00360_0028_AHA2RLADXX/Project_RM8391_RM8392/Sample_2B2/2B2_CCGTCC_L001_R1_001.fastq.gz	Illumina WGS	HG002	Benchmark PSVGT on short reads
HG002	ftp://ftp-trace.ncbi.nlm.nih.gov/ReferenceSamples/giab/data/AshkenazimTrio/HG002_NA24385_son/NIST_HiSeq_HG002_Homogeneity-10953946/HG002_HiSeq300x_fastq/140616_D00360_0028_AHA2RLADXX/Project_RM8391_RM8392/Sample_2B2/2B2_CCGTCC_L001_R1_002.fastq.gz	Illumina WGS	HG002	Benchmark PSVGT on short reads
HG002	ftp://ftp-trace.ncbi.nlm.nih.gov/ReferenceSamples/giab/data/AshkenazimTrio/HG002_NA24385_son/NIST_HiSeq_HG002_Homogeneity-10953946/HG002_HiSeq300x_fastq/140616_D00360_0028_AHA2RLADXX/Project_RM8391_RM8392/Sample_2B2/2B2_CCGTCC_L002_R1_001.fastq.gz	Illumina WGS	HG002	Benchmark PSVGT on short reads
HG002	ftp://ftp-trace.ncbi.nlm.nih.gov/ReferenceSamples/giab/data/AshkenazimTrio/HG002_NA24385_son/NIST_HiSeq_HG002_Homogeneity-10953946/HG002_HiSeq300x_fastq/140616_D00360_0028_AHA2RLADXX/Project_RM8391_RM8392/Sample_2B2/2B2_CCGTCC_L002_R1_002.fastq.gz	Illumina WGS	HG002	Benchmark PSVGT on short reads
HG002	ftp://ftp-trace.ncbi.nlm.nih.gov/ReferenceSamples/giab/data/AshkenazimTrio/HG002_NA24385_son/NIST_HiSeq_HG002_Homogeneity-10953946/HG002_HiSeq300x_fastq/140616_D00360_0028_AHA2RLADXX/Project_RM8391_RM8392/Sample_2C1/2C1_AGTCAA_L001_R1_001.fastq.gz	Illumina WGS	HG002	Benchmark PSVGT on short reads
HG002	ftp://ftp-trace.ncbi.nlm.nih.gov/ReferenceSamples/giab/data/AshkenazimTrio/HG002_NA24385_son/NIST_HiSeq_HG002_Homogeneity-10953946/HG002_HiSeq300x_fastq/140616_D00360_0028_AHA2RLADXX/Project_RM8391_RM8392/Sample_2C1/2C1_AGTCAA_L001_R1_002.fastq.gz	Illumina WGS	HG002	Benchmark PSVGT on short reads
HG002	ftp://ftp-trace.ncbi.nlm.nih.gov/ReferenceSamples/giab/data/AshkenazimTrio/HG002_NA24385_son/NIST_HiSeq_HG002_Homogeneity-10953946/HG002_HiSeq300x_fastq/140616_D00360_0028_AHA2RLADXX/Project_RM8391_RM8392/Sample_2C1/2C1_AGTCAA_L002_R1_001.fastq.gz	Illumina WGS	HG002	Benchmark PSVGT on short reads
HG002	ftp://ftp-trace.ncbi.nlm.nih.gov/ReferenceSamples/giab/data/AshkenazimTrio/HG002_NA24385_son/NIST_HiSeq_HG002_Homogeneity-10953946/HG002_HiSeq300x_fastq/140616_D00360_0028_AHA2RLADXX/Project_RM8391_RM8392/Sample_2C1/2C1_AGTCAA_L002_R1_002.fastq.gz	Illumina WGS	HG002	Benchmark PSVGT on short reads
HG002	ftp://ftp-trace.ncbi.nlm.nih.gov/ReferenceSamples/giab/data/AshkenazimTrio/HG002_NA24385_son/NIST_HiSeq_HG002_Homogeneity-10953946/HG002_HiSeq300x_fastq/140616_D00360_0028_AHA2RLADXX/Project_RM8391_RM8392/Sample_2C2/2C2_AGTTCC_L001_R1_001.fastq.gz	Illumina WGS	HG002	Benchmark PSVGT on short reads
HG002	ftp://ftp-trace.ncbi.nlm.nih.gov/ReferenceSamples/giab/data/AshkenazimTrio/HG002_NA24385_son/NIST_HiSeq_HG002_Homogeneity-10953946/HG002_HiSeq300x_fastq/140616_D00360_0028_AHA2RLADXX/Project_RM8391_RM8392/Sample_2C2/2C2_AGTTCC_L001_R1_002.fastq.gz	Illumina WGS	HG002	Benchmark PSVGT on short reads
HG002	ftp://ftp-trace.ncbi.nlm.nih.gov/ReferenceSamples/giab/data/AshkenazimTrio/HG002_NA24385_son/NIST_HiSeq_HG002_Homogeneity-10953946/HG002_HiSeq300x_fastq/140616_D00360_0028_AHA2RLADXX/Project_RM8391_RM8392/Sample_2C2/2C2_AGTTCC_L002_R1_001.fastq.gz	Illumina WGS	HG002	Benchmark PSVGT on short reads
HG002	ftp://ftp-trace.ncbi.nlm.nih.gov/ReferenceSamples/giab/data/AshkenazimTrio/HG002_NA24385_son/NIST_HiSeq_HG002_Homogeneity-10953946/HG002_HiSeq300x_fastq/140616_D00360_0028_AHA2RLADXX/Project_RM8391_RM8392/Sample_2C2/2C2_AGTTCC_L002_R1_002.fastq.gz	Illumina WGS	HG002	Benchmark PSVGT on short reads
HG002	ftp://ftp-trace.ncbi.nlm.nih.gov/ReferenceSamples/giab/data/AshkenazimTrio/HG002_NA24385_son/NIST_HiSeq_HG002_Homogeneity-10953946/HG002_HiSeq300x_fastq/140616_D00360_0028_AHA2RLADXX/Project_RM8391_RM8392/Sample_2D1/2D1_ATGTCA_L001_R1_001.fastq.gz	Illumina WGS	HG002	Benchmark PSVGT on short reads
HG002	ftp://ftp-trace.ncbi.nlm.nih.gov/ReferenceSamples/giab/data/AshkenazimTrio/HG002_NA24385_son/NIST_HiSeq_HG002_Homogeneity-10953946/HG002_HiSeq300x_fastq/140616_D00360_0028_AHA2RLADXX/Project_RM8391_RM8392/Sample_2D1/2D1_ATGTCA_L001_R1_002.fastq.gz	Illumina WGS	HG002	Benchmark PSVGT on short reads
HG002	ftp://ftp-trace.ncbi.nlm.nih.gov/ReferenceSamples/giab/data/AshkenazimTrio/HG002_NA24385_son/NIST_HiSeq_HG002_Homogeneity-10953946/HG002_HiSeq300x_fastq/140616_D00360_0028_AHA2RLADXX/Project_RM8391_RM8392/Sample_2D1/2D1_ATGTCA_L002_R1_001.fastq.gz	Illumina WGS	HG002	Benchmark PSVGT on short reads
HG002	ftp://ftp-trace.ncbi.nlm.nih.gov/ReferenceSamples/giab/data/AshkenazimTrio/HG002_NA24385_son/NIST_HiSeq_HG002_Homogeneity-10953946/HG002_HiSeq300x_fastq/140616_D00360_0028_AHA2RLADXX/Project_RM8391_RM8392/Sample_2D1/2D1_ATGTCA_L002_R1_002.fastq.gz	Illumina WGS	HG002	Benchmark PSVGT on short reads
HG002	ftp://ftp-trace.ncbi.nlm.nih.gov/ReferenceSamples/giab/data/AshkenazimTrio/HG002_NA24385_son/NIST_HiSeq_HG002_Homogeneity-10953946/HG002_HiSeq300x_fastq/140616_D00360_0028_AHA2RLADXX/Project_RM8391_RM8392/Sample_2D2/2D2_GTCCGC_L001_R1_001.fastq.gz	Illumina WGS	HG002	Benchmark PSVGT on short reads
HG002	ftp://ftp-trace.ncbi.nlm.nih.gov/ReferenceSamples/giab/data/AshkenazimTrio/HG002_NA24385_son/NIST_HiSeq_HG002_Homogeneity-10953946/HG002_HiSeq300x_fastq/140616_D00360_0028_AHA2RLADXX/Project_RM8391_RM8392/Sample_2D2/2D2_GTCCGC_L001_R1_002.fastq.gz	Illumina WGS	HG002	Benchmark PSVGT on short reads
HG002	ftp://ftp-trace.ncbi.nlm.nih.gov/ReferenceSamples/giab/data/AshkenazimTrio/HG002_NA24385_son/NIST_HiSeq_HG002_Homogeneity-10953946/HG002_HiSeq300x_fastq/140616_D00360_0028_AHA2RLADXX/Project_RM8391_RM8392/Sample_2D2/2D2_GTCCGC_L002_R1_001.fastq.gz	Illumina WGS	HG002	Benchmark PSVGT on short reads
HG002	ftp://ftp-trace.ncbi.nlm.nih.gov/ReferenceSamples/giab/data/AshkenazimTrio/HG002_NA24385_son/NIST_HiSeq_HG002_Homogeneity-10953946/HG002_HiSeq300x_fastq/140616_D00360_0028_AHA2RLADXX/Project_RM8391_RM8392/Sample_2D2/2D2_GTCCGC_L002_R1_002.fastq.gz	Illumina WGS	HG002	Benchmark PSVGT on short reads
HG002	ftp://ftp-trace.ncbi.nlm.nih.gov/ReferenceSamples/giab/data/AshkenazimTrio/HG002_NA24385_son/NIST_HiSeq_HG002_Homogeneity-10953946/HG002_HiSeq300x_fastq/140616_D00360_0028_AHA2RLADXX/Project_RM8391_RM8392/Sample_2F1/2F1_ACAGTG_L001_R1_001.fastq.gz	Illumina WGS	HG002	Benchmark PSVGT on short reads
HG002	ftp://ftp-trace.ncbi.nlm.nih.gov/ReferenceSamples/giab/data/AshkenazimTrio/HG002_NA24385_son/NIST_HiSeq_HG002_Homogeneity-10953946/HG002_HiSeq300x_fastq/140616_D00360_0028_AHA2RLADXX/Project_RM8391_RM8392/Sample_2F1/2F1_ACAGTG_L001_R1_002.fastq.gz	Illumina WGS	HG002	Benchmark PSVGT on short reads
HG002	ftp://ftp-trace.ncbi.nlm.nih.gov/ReferenceSamples/giab/data/AshkenazimTrio/HG002_NA24385_son/NIST_HiSeq_HG002_Homogeneity-10953946/HG002_HiSeq300x_fastq/140616_D00360_0028_AHA2RLADXX/Project_RM8391_RM8392/Sample_2F1/2F1_ACAGTG_L001_R1_003.fastq.gz	Illumina WGS	HG002	Benchmark PSVGT on short reads
HG002	ftp://ftp-trace.ncbi.nlm.nih.gov/ReferenceSamples/giab/data/AshkenazimTrio/HG002_NA24385_son/NIST_HiSeq_HG002_Homogeneity-10953946/HG002_HiSeq300x_fastq/140616_D00360_0028_AHA2RLADXX/Project_RM8391_RM8392/Sample_2F1/2F1_ACAGTG_L001_R1_004.fastq.gz	Illumina WGS	HG002	Benchmark PSVGT on short reads
HG002	ftp://ftp-trace.ncbi.nlm.nih.gov/ReferenceSamples/giab/data/AshkenazimTrio/HG002_NA24385_son/NIST_HiSeq_HG002_Homogeneity-10953946/HG002_HiSeq300x_fastq/140616_D00360_0028_AHA2RLADXX/Project_RM8391_RM8392/Sample_2F1/2F1_ACAGTG_L001_R1_005.fastq.gz	Illumina WGS	HG002	Benchmark PSVGT on short reads
HG002	ftp://ftp-trace.ncbi.nlm.nih.gov/ReferenceSamples/giab/data/AshkenazimTrio/HG002_NA24385_son/NIST_HiSeq_HG002_Homogeneity-10953946/HG002_HiSeq300x_fastq/140616_D00360_0028_AHA2RLADXX/Project_RM8391_RM8392/Sample_2F1/2F1_ACAGTG_L001_R1_006.fastq.gz	Illumina WGS	HG002	Benchmark PSVGT on short reads
HG002	ftp://ftp-trace.ncbi.nlm.nih.gov/ReferenceSamples/giab/data/AshkenazimTrio/HG002_NA24385_son/NIST_HiSeq_HG002_Homogeneity-10953946/HG002_HiSeq300x_fastq/140616_D00360_0028_AHA2RLADXX/Project_RM8391_RM8392/Sample_2F1/2F1_ACAGTG_L002_R1_001.fastq.gz	Illumina WGS	HG002	Benchmark PSVGT on short reads
HG002	ftp://ftp-trace.ncbi.nlm.nih.gov/ReferenceSamples/giab/data/AshkenazimTrio/HG002_NA24385_son/NIST_HiSeq_HG002_Homogeneity-10953946/HG002_HiSeq300x_fastq/140616_D00360_0028_AHA2RLADXX/Project_RM8391_RM8392/Sample_2F1/2F1_ACAGTG_L002_R1_002.fastq.gz	Illumina WGS	HG002	Benchmark PSVGT on short reads
HG002	ftp://ftp-trace.ncbi.nlm.nih.gov/ReferenceSamples/giab/data/AshkenazimTrio/HG002_NA24385_son/NIST_HiSeq_HG002_Homogeneity-10953946/HG002_HiSeq300x_fastq/140616_D00360_0028_AHA2RLADXX/Project_RM8391_RM8392/Sample_2F1/2F1_ACAGTG_L002_R1_003.fastq.gz	Illumina WGS	HG002	Benchmark PSVGT on short reads
HG002	ftp://ftp-trace.ncbi.nlm.nih.gov/ReferenceSamples/giab/data/AshkenazimTrio/HG002_NA24385_son/NIST_HiSeq_HG002_Homogeneity-10953946/HG002_HiSeq300x_fastq/140616_D00360_0028_AHA2RLADXX/Project_RM8391_RM8392/Sample_2F1/2F1_ACAGTG_L002_R1_004.fastq.gz	Illumina WGS	HG002	Benchmark PSVGT on short reads
HG002	ftp://ftp-trace.ncbi.nlm.nih.gov/ReferenceSamples/giab/data/AshkenazimTrio/HG002_NA24385_son/NIST_HiSeq_HG002_Homogeneity-10953946/HG002_HiSeq300x_fastq/140616_D00360_0028_AHA2RLADXX/Project_RM8391_RM8392/Sample_2F1/2F1_ACAGTG_L002_R1_005.fastq.gz	Illumina WGS	HG002	Benchmark PSVGT on short reads
HG002	ftp://ftp-trace.ncbi.nlm.nih.gov/ReferenceSamples/giab/data/AshkenazimTrio/HG002_NA24385_son/NIST_HiSeq_HG002_Homogeneity-10953946/HG002_HiSeq300x_fastq/140616_D00360_0028_AHA2RLADXX/Project_RM8391_RM8392/Sample_2F1/2F1_ACAGTG_L002_R1_006.fastq.gz	Illumina WGS	HG002	Benchmark PSVGT on short reads
HG002	ftp://ftp-trace.ncbi.nlm.nih.gov/ReferenceSamples/giab/data/AshkenazimTrio/HG002_NA24385_son/NIST_HiSeq_HG002_Homogeneity-10953946/HG002_HiSeq300x_fastq/140616_D00360_0028_AHA2RLADXX/Project_RM8391_RM8392/Sample_2F2/2F2_GCCAAT_L001_R1_001.fastq.gz	Illumina WGS	HG002	Benchmark PSVGT on short reads
HG002	ftp://ftp-trace.ncbi.nlm.nih.gov/ReferenceSamples/giab/data/AshkenazimTrio/HG002_NA24385_son/NIST_HiSeq_HG002_Homogeneity-10953946/HG002_HiSeq300x_fastq/140616_D00360_0028_AHA2RLADXX/Project_RM8391_RM8392/Sample_2F2/2F2_GCCAAT_L001_R1_002.fastq.gz	Illumina WGS	HG002	Benchmark PSVGT on short reads
HG002	ftp://ftp-trace.ncbi.nlm.nih.gov/ReferenceSamples/giab/data/AshkenazimTrio/HG002_NA24385_son/NIST_HiSeq_HG002_Homogeneity-10953946/HG002_HiSeq300x_fastq/140616_D00360_0028_AHA2RLADXX/Project_RM8391_RM8392/Sample_2F2/2F2_GCCAAT_L001_R1_003.fastq.gz	Illumina WGS	HG002	Benchmark PSVGT on short reads
HG002	ftp://ftp-trace.ncbi.nlm.nih.gov/ReferenceSamples/giab/data/AshkenazimTrio/HG002_NA24385_son/NIST_HiSeq_HG002_Homogeneity-10953946/HG002_HiSeq300x_fastq/140616_D00360_0028_AHA2RLADXX/Project_RM8391_RM8392/Sample_2F2/2F2_GCCAAT_L001_R1_004.fastq.gz	Illumina WGS	HG002	Benchmark PSVGT on short reads
HG002	ftp://ftp-trace.ncbi.nlm.nih.gov/ReferenceSamples/giab/data/AshkenazimTrio/HG002_NA24385_son/NIST_HiSeq_HG002_Homogeneity-10953946/HG002_HiSeq300x_fastq/140616_D00360_0028_AHA2RLADXX/Project_RM8391_RM8392/Sample_2F2/2F2_GCCAAT_L001_R1_005.fastq.gz	Illumina WGS	HG002	Benchmark PSVGT on short reads
HG002	ftp://ftp-trace.ncbi.nlm.nih.gov/ReferenceSamples/giab/data/AshkenazimTrio/HG002_NA24385_son/NIST_HiSeq_HG002_Homogeneity-10953946/HG002_HiSeq300x_fastq/140616_D00360_0028_AHA2RLADXX/Project_RM8391_RM8392/Sample_2F2/2F2_GCCAAT_L001_R1_006.fastq.gz	Illumina WGS	HG002	Benchmark PSVGT on short reads
HG002	ftp://ftp-trace.ncbi.nlm.nih.gov/ReferenceSamples/giab/data/AshkenazimTrio/HG002_NA24385_son/NIST_HiSeq_HG002_Homogeneity-10953946/HG002_HiSeq300x_fastq/140616_D00360_0028_AHA2RLADXX/Project_RM8391_RM8392/Sample_2F2/2F2_GCCAAT_L002_R1_001.fastq.gz	Illumina WGS	HG002	Benchmark PSVGT on short reads
HG002	ftp://ftp-trace.ncbi.nlm.nih.gov/ReferenceSamples/giab/data/AshkenazimTrio/HG002_NA24385_son/NIST_HiSeq_HG002_Homogeneity-10953946/HG002_HiSeq300x_fastq/140616_D00360_0028_AHA2RLADXX/Project_RM8391_RM8392/Sample_2F2/2F2_GCCAAT_L002_R1_002.fastq.gz	Illumina WGS	HG002	Benchmark PSVGT on short reads
HG002	ftp://ftp-trace.ncbi.nlm.nih.gov/ReferenceSamples/giab/data/AshkenazimTrio/HG002_NA24385_son/NIST_HiSeq_HG002_Homogeneity-10953946/HG002_HiSeq300x_fastq/140616_D00360_0028_AHA2RLADXX/Project_RM8391_RM8392/Sample_2F2/2F2_GCCAAT_L002_R1_003.fastq.gz	Illumina WGS	HG002	Benchmark PSVGT on short reads
HG002	ftp://ftp-trace.ncbi.nlm.nih.gov/ReferenceSamples/giab/data/AshkenazimTrio/HG002_NA24385_son/NIST_HiSeq_HG002_Homogeneity-10953946/HG002_HiSeq300x_fastq/140616_D00360_0028_AHA2RLADXX/Project_RM8391_RM8392/Sample_2F2/2F2_GCCAAT_L002_R1_004.fastq.gz	Illumina WGS	HG002	Benchmark PSVGT on short reads
HG002	ftp://ftp-trace.ncbi.nlm.nih.gov/ReferenceSamples/giab/data/AshkenazimTrio/HG002_NA24385_son/NIST_HiSeq_HG002_Homogeneity-10953946/HG002_HiSeq300x_fastq/140616_D00360_0028_AHA2RLADXX/Project_RM8391_RM8392/Sample_2F2/2F2_GCCAAT_L002_R1_005.fastq.gz	Illumina WGS	HG002	Benchmark PSVGT on short reads
HG002	ftp://ftp-trace.ncbi.nlm.nih.gov/ReferenceSamples/giab/data/AshkenazimTrio/HG002_NA24385_son/NIST_HiSeq_HG002_Homogeneity-10953946/HG002_HiSeq300x_fastq/140616_D00360_0028_AHA2RLADXX/Project_RM8391_RM8392/Sample_2F2/2F2_GCCAAT_L002_R1_006.fastq.gz	Illumina WGS	HG002	Benchmark PSVGT on short reads
HG002	ftp://ftp-trace.ncbi.nlm.nih.gov/ReferenceSamples/giab/data/AshkenazimTrio/HG002_NA24385_son/NIST_HiSeq_HG002_Homogeneity-10953946/HG002_HiSeq300x_fastq/140616_D00360_0028_AHA2RLADXX/Project_RM8391_RM8392/Sample_2L1/2L1_CTTGTA_L001_R1_001.fastq.gz	Illumina WGS	HG002	Benchmark PSVGT on short reads
HG002	ftp://ftp-trace.ncbi.nlm.nih.gov/ReferenceSamples/giab/data/AshkenazimTrio/HG002_NA24385_son/NIST_HiSeq_HG002_Homogeneity-10953946/HG002_HiSeq300x_fastq/140616_D00360_0028_AHA2RLADXX/Project_RM8391_RM8392/Sample_2L1/2L1_CTTGTA_L001_R1_002.fastq.gz	Illumina WGS	HG002	Benchmark PSVGT on short reads
HG002	ftp://ftp-trace.ncbi.nlm.nih.gov/ReferenceSamples/giab/data/AshkenazimTrio/HG002_NA24385_son/NIST_HiSeq_HG002_Homogeneity-10953946/HG002_HiSeq300x_fastq/140616_D00360_0028_AHA2RLADXX/Project_RM8391_RM8392/Sample_2L1/2L1_CTTGTA_L001_R1_003.fastq.gz	Illumina WGS	HG002	Benchmark PSVGT on short reads
HG002	ftp://ftp-trace.ncbi.nlm.nih.gov/ReferenceSamples/giab/data/AshkenazimTrio/HG002_NA24385_son/NIST_HiSeq_HG002_Homogeneity-10953946/HG002_HiSeq300x_fastq/140616_D00360_0028_AHA2RLADXX/Project_RM8391_RM8392/Sample_2L1/2L1_CTTGTA_L001_R1_004.fastq.gz	Illumina WGS	HG002	Benchmark PSVGT on short reads
HG002	ftp://ftp-trace.ncbi.nlm.nih.gov/ReferenceSamples/giab/data/AshkenazimTrio/HG002_NA24385_son/NIST_HiSeq_HG002_Homogeneity-10953946/HG002_HiSeq300x_fastq/140616_D00360_0028_AHA2RLADXX/Project_RM8391_RM8392/Sample_2L1/2L1_CTTGTA_L001_R1_005.fastq.gz	Illumina WGS	HG002	Benchmark PSVGT on short reads
HG002	ftp://ftp-trace.ncbi.nlm.nih.gov/ReferenceSamples/giab/data/AshkenazimTrio/HG002_NA24385_son/NIST_HiSeq_HG002_Homogeneity-10953946/HG002_HiSeq300x_fastq/140616_D00360_0028_AHA2RLADXX/Project_RM8391_RM8392/Sample_2L1/2L1_CTTGTA_L001_R1_006.fastq.gz	Illumina WGS	HG002	Benchmark PSVGT on short reads
HG002	ftp://ftp-trace.ncbi.nlm.nih.gov/ReferenceSamples/giab/data/AshkenazimTrio/HG002_NA24385_son/NIST_HiSeq_HG002_Homogeneity-10953946/HG002_HiSeq300x_fastq/140616_D00360_0028_AHA2RLADXX/Project_RM8391_RM8392/Sample_2L1/2L1_CTTGTA_L002_R1_001.fastq.gz	Illumina WGS	HG002	Benchmark PSVGT on short reads
HG002	ftp://ftp-trace.ncbi.nlm.nih.gov/ReferenceSamples/giab/data/AshkenazimTrio/HG002_NA24385_son/NIST_HiSeq_HG002_Homogeneity-10953946/HG002_HiSeq300x_fastq/140616_D00360_0028_AHA2RLADXX/Project_RM8391_RM8392/Sample_2L1/2L1_CTTGTA_L002_R1_002.fastq.gz	Illumina WGS	HG002	Benchmark PSVGT on short reads
HG002	ftp://ftp-trace.ncbi.nlm.nih.gov/ReferenceSamples/giab/data/AshkenazimTrio/HG002_NA24385_son/NIST_HiSeq_HG002_Homogeneity-10953946/HG002_HiSeq300x_fastq/140616_D00360_0028_AHA2RLADXX/Project_RM8391_RM8392/Sample_2L1/2L1_CTTGTA_L002_R1_003.fastq.gz	Illumina WGS	HG002	Benchmark PSVGT on short reads
HG002	ftp://ftp-trace.ncbi.nlm.nih.gov/ReferenceSamples/giab/data/AshkenazimTrio/HG002_NA24385_son/NIST_HiSeq_HG002_Homogeneity-10953946/HG002_HiSeq300x_fastq/140616_D00360_0028_AHA2RLADXX/Project_RM8391_RM8392/Sample_2L1/2L1_CTTGTA_L002_R1_004.fastq.gz	Illumina WGS	HG002	Benchmark PSVGT on short reads
HG002	ftp://ftp-trace.ncbi.nlm.nih.gov/ReferenceSamples/giab/data/AshkenazimTrio/HG002_NA24385_son/NIST_HiSeq_HG002_Homogeneity-10953946/HG002_HiSeq300x_fastq/140616_D00360_0028_AHA2RLADXX/Project_RM8391_RM8392/Sample_2L1/2L1_CTTGTA_L002_R1_005.fastq.gz	Illumina WGS	HG002	Benchmark PSVGT on short reads
HG002	ftp://ftp-trace.ncbi.nlm.nih.gov/ReferenceSamples/giab/data/AshkenazimTrio/HG002_NA24385_son/NIST_HiSeq_HG002_Homogeneity-10953946/HG002_HiSeq300x_fastq/140616_D00360_0028_AHA2RLADXX/Project_RM8391_RM8392/Sample_2L1/2L1_CTTGTA_L002_R1_006.fastq.gz	Illumina WGS	HG002	Benchmark PSVGT on short reads
HG002	ftp://ftp-trace.ncbi.nlm.nih.gov/ReferenceSamples/giab/data/AshkenazimTrio/HG002_NA24385_son/NIST_HiSeq_HG002_Homogeneity-10953946/HG002_HiSeq300x_fastq/140616_D00360_0028_AHA2RLADXX/Project_RM8391_RM8392/Sample_2L2/2L2_GTGAAA_L001_R1_001.fastq.gz	Illumina WGS	HG002	Benchmark PSVGT on short reads
HG002	ftp://ftp-trace.ncbi.nlm.nih.gov/ReferenceSamples/giab/data/AshkenazimTrio/HG002_NA24385_son/NIST_HiSeq_HG002_Homogeneity-10953946/HG002_HiSeq300x_fastq/140616_D00360_0028_AHA2RLADXX/Project_RM8391_RM8392/Sample_2L2/2L2_GTGAAA_L001_R1_002.fastq.gz	Illumina WGS	HG002	Benchmark PSVGT on short reads
HG002	ftp://ftp-trace.ncbi.nlm.nih.gov/ReferenceSamples/giab/data/AshkenazimTrio/HG002_NA24385_son/NIST_HiSeq_HG002_Homogeneity-10953946/HG002_HiSeq300x_fastq/140616_D00360_0028_AHA2RLADXX/Project_RM8391_RM8392/Sample_2L2/2L2_GTGAAA_L001_R1_003.fastq.gz	Illumina WGS	HG002	Benchmark PSVGT on short reads
HG002	ftp://ftp-trace.ncbi.nlm.nih.gov/ReferenceSamples/giab/data/AshkenazimTrio/HG002_NA24385_son/NIST_HiSeq_HG002_Homogeneity-10953946/HG002_HiSeq300x_fastq/140616_D00360_0028_AHA2RLADXX/Project_RM8391_RM8392/Sample_2L2/2L2_GTGAAA_L001_R1_004.fastq.gz	Illumina WGS	HG002	Benchmark PSVGT on short reads
HG002	ftp://ftp-trace.ncbi.nlm.nih.gov/ReferenceSamples/giab/data/AshkenazimTrio/HG002_NA24385_son/NIST_HiSeq_HG002_Homogeneity-10953946/HG002_HiSeq300x_fastq/140616_D00360_0028_AHA2RLADXX/Project_RM8391_RM8392/Sample_2L2/2L2_GTGAAA_L001_R1_005.fastq.gz	Illumina WGS	HG002	Benchmark PSVGT on short reads
HG002	ftp://ftp-trace.ncbi.nlm.nih.gov/ReferenceSamples/giab/data/AshkenazimTrio/HG002_NA24385_son/NIST_HiSeq_HG002_Homogeneity-10953946/HG002_HiSeq300x_fastq/140616_D00360_0028_AHA2RLADXX/Project_RM8391_RM8392/Sample_2L2/2L2_GTGAAA_L001_R1_006.fastq.gz	Illumina WGS	HG002	Benchmark PSVGT on short reads
HG002	ftp://ftp-trace.ncbi.nlm.nih.gov/ReferenceSamples/giab/data/AshkenazimTrio/HG002_NA24385_son/NIST_HiSeq_HG002_Homogeneity-10953946/HG002_HiSeq300x_fastq/140616_D00360_0028_AHA2RLADXX/Project_RM8391_RM8392/Sample_2L2/2L2_GTGAAA_L002_R1_001.fastq.gz	Illumina WGS	HG002	Benchmark PSVGT on short reads
HG002	ftp://ftp-trace.ncbi.nlm.nih.gov/ReferenceSamples/giab/data/AshkenazimTrio/HG002_NA24385_son/NIST_HiSeq_HG002_Homogeneity-10953946/HG002_HiSeq300x_fastq/140616_D00360_0028_AHA2RLADXX/Project_RM8391_RM8392/Sample_2L2/2L2_GTGAAA_L002_R1_002.fastq.gz	Illumina WGS	HG002	Benchmark PSVGT on short reads
HG002	ftp://ftp-trace.ncbi.nlm.nih.gov/ReferenceSamples/giab/data/AshkenazimTrio/HG002_NA24385_son/NIST_HiSeq_HG002_Homogeneity-10953946/HG002_HiSeq300x_fastq/140616_D00360_0028_AHA2RLADXX/Project_RM8391_RM8392/Sample_2L2/2L2_GTGAAA_L002_R1_003.fastq.gz	Illumina WGS	HG002	Benchmark PSVGT on short reads
HG002	ftp://ftp-trace.ncbi.nlm.nih.gov/ReferenceSamples/giab/data/AshkenazimTrio/HG002_NA24385_son/NIST_HiSeq_HG002_Homogeneity-10953946/HG002_HiSeq300x_fastq/140616_D00360_0028_AHA2RLADXX/Project_RM8391_RM8392/Sample_2L2/2L2_GTGAAA_L002_R1_004.fastq.gz	Illumina WGS	HG002	Benchmark PSVGT on short reads
HG002	ftp://ftp-trace.ncbi.nlm.nih.gov/ReferenceSamples/giab/data/AshkenazimTrio/HG002_NA24385_son/NIST_HiSeq_HG002_Homogeneity-10953946/HG002_HiSeq300x_fastq/140616_D00360_0028_AHA2RLADXX/Project_RM8391_RM8392/Sample_2L2/2L2_GTGAAA_L002_R1_005.fastq.gz	Illumina WGS	HG002	Benchmark PSVGT on short reads
HG002	ftp://ftp-trace.ncbi.nlm.nih.gov/ReferenceSamples/giab/data/AshkenazimTrio/HG002_NA24385_son/NIST_HiSeq_HG002_Homogeneity-10953946/HG002_HiSeq300x_fastq/140616_D00360_0028_AHA2RLADXX/Project_RM8391_RM8392/Sample_2L2/2L2_GTGAAA_L002_R1_006.fastq.gz	Illumina WGS	HG002	Benchmark PSVGT on short reads
HG002	ftp://ftp-trace.ncbi.nlm.nih.gov/ReferenceSamples/giab/data/AshkenazimTrio/HG002_NA24385_son/NIST_HiSeq_HG002_Homogeneity-10953946/HG002_HiSeq300x_fastq/140616_D00360_0029_BHA2WPADXX/Project_RM8391_RM8392/Sample_2A1/2A1_CGATGT_L001_R1_001.fastq.gz	Illumina WGS	HG002	Benchmark PSVGT on short reads
HG002	ftp://ftp-trace.ncbi.nlm.nih.gov/ReferenceSamples/giab/data/AshkenazimTrio/HG002_NA24385_son/NIST_HiSeq_HG002_Homogeneity-10953946/HG002_HiSeq300x_fastq/140616_D00360_0029_BHA2WPADXX/Project_RM8391_RM8392/Sample_2A1/2A1_CGATGT_L001_R1_002.fastq.gz	Illumina WGS	HG002	Benchmark PSVGT on short reads
HG002	ftp://ftp-trace.ncbi.nlm.nih.gov/ReferenceSamples/giab/data/AshkenazimTrio/HG002_NA24385_son/NIST_HiSeq_HG002_Homogeneity-10953946/HG002_HiSeq300x_fastq/140616_D00360_0029_BHA2WPADXX/Project_RM8391_RM8392/Sample_2A1/2A1_CGATGT_L002_R1_001.fastq.gz	Illumina WGS	HG002	Benchmark PSVGT on short reads
HG002	ftp://ftp-trace.ncbi.nlm.nih.gov/ReferenceSamples/giab/data/AshkenazimTrio/HG002_NA24385_son/NIST_HiSeq_HG002_Homogeneity-10953946/HG002_HiSeq300x_fastq/140616_D00360_0029_BHA2WPADXX/Project_RM8391_RM8392/Sample_2A1/2A1_CGATGT_L002_R1_002.fastq.gz	Illumina WGS	HG002	Benchmark PSVGT on short reads
HG002	ftp://ftp-trace.ncbi.nlm.nih.gov/ReferenceSamples/giab/data/AshkenazimTrio/HG002_NA24385_son/NIST_HiSeq_HG002_Homogeneity-10953946/HG002_HiSeq300x_fastq/140616_D00360_0029_BHA2WPADXX/Project_RM8391_RM8392/Sample_2A2/2A2_TGACCA_L001_R1_001.fastq.gz	Illumina WGS	HG002	Benchmark PSVGT on short reads
HG002	ftp://ftp-trace.ncbi.nlm.nih.gov/ReferenceSamples/giab/data/AshkenazimTrio/HG002_NA24385_son/NIST_HiSeq_HG002_Homogeneity-10953946/HG002_HiSeq300x_fastq/140616_D00360_0029_BHA2WPADXX/Project_RM8391_RM8392/Sample_2A2/2A2_TGACCA_L001_R1_002.fastq.gz	Illumina WGS	HG002	Benchmark PSVGT on short reads
HG002	ftp://ftp-trace.ncbi.nlm.nih.gov/ReferenceSamples/giab/data/AshkenazimTrio/HG002_NA24385_son/NIST_HiSeq_HG002_Homogeneity-10953946/HG002_HiSeq300x_fastq/140616_D00360_0029_BHA2WPADXX/Project_RM8391_RM8392/Sample_2A2/2A2_TGACCA_L002_R1_001.fastq.gz	Illumina WGS	HG002	Benchmark PSVGT on short reads
HG002	ftp://ftp-trace.ncbi.nlm.nih.gov/ReferenceSamples/giab/data/AshkenazimTrio/HG002_NA24385_son/NIST_HiSeq_HG002_Homogeneity-10953946/HG002_HiSeq300x_fastq/140616_D00360_0029_BHA2WPADXX/Project_RM8391_RM8392/Sample_2A2/2A2_TGACCA_L002_R1_002.fastq.gz	Illumina WGS	HG002	Benchmark PSVGT on short reads
HG002	ftp://ftp-trace.ncbi.nlm.nih.gov/ReferenceSamples/giab/data/AshkenazimTrio/HG002_NA24385_son/NIST_HiSeq_HG002_Homogeneity-10953946/HG002_HiSeq300x_fastq/140616_D00360_0029_BHA2WPADXX/Project_RM8391_RM8392/Sample_2B1/2B1_CAGATC_L001_R1_001.fastq.gz	Illumina WGS	HG002	Benchmark PSVGT on short reads
HG002	ftp://ftp-trace.ncbi.nlm.nih.gov/ReferenceSamples/giab/data/AshkenazimTrio/HG002_NA24385_son/NIST_HiSeq_HG002_Homogeneity-10953946/HG002_HiSeq300x_fastq/140616_D00360_0029_BHA2WPADXX/Project_RM8391_RM8392/Sample_2B1/2B1_CAGATC_L001_R1_002.fastq.gz	Illumina WGS	HG002	Benchmark PSVGT on short reads
HG002	ftp://ftp-trace.ncbi.nlm.nih.gov/ReferenceSamples/giab/data/AshkenazimTrio/HG002_NA24385_son/NIST_HiSeq_HG002_Homogeneity-10953946/HG002_HiSeq300x_fastq/140616_D00360_0029_BHA2WPADXX/Project_RM8391_RM8392/Sample_2B1/2B1_CAGATC_L002_R1_001.fastq.gz	Illumina WGS	HG002	Benchmark PSVGT on short reads
HG002	ftp://ftp-trace.ncbi.nlm.nih.gov/ReferenceSamples/giab/data/AshkenazimTrio/HG002_NA24385_son/NIST_HiSeq_HG002_Homogeneity-10953946/HG002_HiSeq300x_fastq/140616_D00360_0029_BHA2WPADXX/Project_RM8391_RM8392/Sample_2B1/2B1_CAGATC_L002_R1_002.fastq.gz	Illumina WGS	HG002	Benchmark PSVGT on short reads
HG002	ftp://ftp-trace.ncbi.nlm.nih.gov/ReferenceSamples/giab/data/AshkenazimTrio/HG002_NA24385_son/NIST_HiSeq_HG002_Homogeneity-10953946/HG002_HiSeq300x_fastq/140616_D00360_0029_BHA2WPADXX/Project_RM8391_RM8392/Sample_2B2/2B2_CCGTCC_L001_R1_001.fastq.gz	Illumina WGS	HG002	Benchmark PSVGT on short reads
HG002	ftp://ftp-trace.ncbi.nlm.nih.gov/ReferenceSamples/giab/data/AshkenazimTrio/HG002_NA24385_son/NIST_HiSeq_HG002_Homogeneity-10953946/HG002_HiSeq300x_fastq/140616_D00360_0029_BHA2WPADXX/Project_RM8391_RM8392/Sample_2B2/2B2_CCGTCC_L001_R1_002.fastq.gz	Illumina WGS	HG002	Benchmark PSVGT on short reads
HG002	ftp://ftp-trace.ncbi.nlm.nih.gov/ReferenceSamples/giab/data/AshkenazimTrio/HG002_NA24385_son/NIST_HiSeq_HG002_Homogeneity-10953946/HG002_HiSeq300x_fastq/140616_D00360_0029_BHA2WPADXX/Project_RM8391_RM8392/Sample_2B2/2B2_CCGTCC_L002_R1_001.fastq.gz	Illumina WGS	HG002	Benchmark PSVGT on short reads
HG002	ftp://ftp-trace.ncbi.nlm.nih.gov/ReferenceSamples/giab/data/AshkenazimTrio/HG002_NA24385_son/NIST_HiSeq_HG002_Homogeneity-10953946/HG002_HiSeq300x_fastq/140616_D00360_0029_BHA2WPADXX/Project_RM8391_RM8392/Sample_2B2/2B2_CCGTCC_L002_R1_002.fastq.gz	Illumina WGS	HG002	Benchmark PSVGT on short reads
HG002	ftp://ftp-trace.ncbi.nlm.nih.gov/ReferenceSamples/giab/data/AshkenazimTrio/HG002_NA24385_son/NIST_HiSeq_HG002_Homogeneity-10953946/HG002_HiSeq300x_fastq/140616_D00360_0029_BHA2WPADXX/Project_RM8391_RM8392/Sample_2C1/2C1_AGTCAA_L001_R1_001.fastq.gz	Illumina WGS	HG002	Benchmark PSVGT on short reads
HG002	ftp://ftp-trace.ncbi.nlm.nih.gov/ReferenceSamples/giab/data/AshkenazimTrio/HG002_NA24385_son/NIST_HiSeq_HG002_Homogeneity-10953946/HG002_HiSeq300x_fastq/140616_D00360_0029_BHA2WPADXX/Project_RM8391_RM8392/Sample_2C1/2C1_AGTCAA_L001_R1_002.fastq.gz	Illumina WGS	HG002	Benchmark PSVGT on short reads
HG002	ftp://ftp-trace.ncbi.nlm.nih.gov/ReferenceSamples/giab/data/AshkenazimTrio/HG002_NA24385_son/NIST_HiSeq_HG002_Homogeneity-10953946/HG002_HiSeq300x_fastq/140616_D00360_0029_BHA2WPADXX/Project_RM8391_RM8392/Sample_2C1/2C1_AGTCAA_L002_R1_001.fastq.gz	Illumina WGS	HG002	Benchmark PSVGT on short reads
HG002	ftp://ftp-trace.ncbi.nlm.nih.gov/ReferenceSamples/giab/data/AshkenazimTrio/HG002_NA24385_son/NIST_HiSeq_HG002_Homogeneity-10953946/HG002_HiSeq300x_fastq/140616_D00360_0029_BHA2WPADXX/Project_RM8391_RM8392/Sample_2C1/2C1_AGTCAA_L002_R1_002.fastq.gz	Illumina WGS	HG002	Benchmark PSVGT on short reads
HG002	ftp://ftp-trace.ncbi.nlm.nih.gov/ReferenceSamples/giab/data/AshkenazimTrio/HG002_NA24385_son/NIST_HiSeq_HG002_Homogeneity-10953946/HG002_HiSeq300x_fastq/140616_D00360_0029_BHA2WPADXX/Project_RM8391_RM8392/Sample_2C2/2C2_AGTTCC_L001_R1_001.fastq.gz	Illumina WGS	HG002	Benchmark PSVGT on short reads
HG002	ftp://ftp-trace.ncbi.nlm.nih.gov/ReferenceSamples/giab/data/AshkenazimTrio/HG002_NA24385_son/NIST_HiSeq_HG002_Homogeneity-10953946/HG002_HiSeq300x_fastq/140616_D00360_0029_BHA2WPADXX/Project_RM8391_RM8392/Sample_2C2/2C2_AGTTCC_L001_R1_002.fastq.gz	Illumina WGS	HG002	Benchmark PSVGT on short reads
HG002	ftp://ftp-trace.ncbi.nlm.nih.gov/ReferenceSamples/giab/data/AshkenazimTrio/HG002_NA24385_son/NIST_HiSeq_HG002_Homogeneity-10953946/HG002_HiSeq300x_fastq/140616_D00360_0029_BHA2WPADXX/Project_RM8391_RM8392/Sample_2C2/2C2_AGTTCC_L002_R1_001.fastq.gz	Illumina WGS	HG002	Benchmark PSVGT on short reads
HG002	ftp://ftp-trace.ncbi.nlm.nih.gov/ReferenceSamples/giab/data/AshkenazimTrio/HG002_NA24385_son/NIST_HiSeq_HG002_Homogeneity-10953946/HG002_HiSeq300x_fastq/140616_D00360_0029_BHA2WPADXX/Project_RM8391_RM8392/Sample_2C2/2C2_AGTTCC_L002_R1_002.fastq.gz	Illumina WGS	HG002	Benchmark PSVGT on short reads
HG002	ftp://ftp-trace.ncbi.nlm.nih.gov/ReferenceSamples/giab/data/AshkenazimTrio/HG002_NA24385_son/NIST_HiSeq_HG002_Homogeneity-10953946/HG002_HiSeq300x_fastq/140616_D00360_0029_BHA2WPADXX/Project_RM8391_RM8392/Sample_2D1/2D1_ATGTCA_L001_R1_001.fastq.gz	Illumina WGS	HG002	Benchmark PSVGT on short reads
HG002	ftp://ftp-trace.ncbi.nlm.nih.gov/ReferenceSamples/giab/data/AshkenazimTrio/HG002_NA24385_son/NIST_HiSeq_HG002_Homogeneity-10953946/HG002_HiSeq300x_fastq/140616_D00360_0029_BHA2WPADXX/Project_RM8391_RM8392/Sample_2D1/2D1_ATGTCA_L001_R1_002.fastq.gz	Illumina WGS	HG002	Benchmark PSVGT on short reads
HG002	ftp://ftp-trace.ncbi.nlm.nih.gov/ReferenceSamples/giab/data/AshkenazimTrio/HG002_NA24385_son/NIST_HiSeq_HG002_Homogeneity-10953946/HG002_HiSeq300x_fastq/140616_D00360_0029_BHA2WPADXX/Project_RM8391_RM8392/Sample_2D1/2D1_ATGTCA_L002_R1_001.fastq.gz	Illumina WGS	HG002	Benchmark PSVGT on short reads
HG002	ftp://ftp-trace.ncbi.nlm.nih.gov/ReferenceSamples/giab/data/AshkenazimTrio/HG002_NA24385_son/NIST_HiSeq_HG002_Homogeneity-10953946/HG002_HiSeq300x_fastq/140616_D00360_0029_BHA2WPADXX/Project_RM8391_RM8392/Sample_2D1/2D1_ATGTCA_L002_R1_002.fastq.gz	Illumina WGS	HG002	Benchmark PSVGT on short reads
HG002	ftp://ftp-trace.ncbi.nlm.nih.gov/ReferenceSamples/giab/data/AshkenazimTrio/HG002_NA24385_son/NIST_HiSeq_HG002_Homogeneity-10953946/HG002_HiSeq300x_fastq/140616_D00360_0029_BHA2WPADXX/Project_RM8391_RM8392/Sample_2D2/2D2_GTCCGC_L001_R1_001.fastq.gz	Illumina WGS	HG002	Benchmark PSVGT on short reads
HG002	ftp://ftp-trace.ncbi.nlm.nih.gov/ReferenceSamples/giab/data/AshkenazimTrio/HG002_NA24385_son/NIST_HiSeq_HG002_Homogeneity-10953946/HG002_HiSeq300x_fastq/140616_D00360_0029_BHA2WPADXX/Project_RM8391_RM8392/Sample_2D2/2D2_GTCCGC_L001_R1_002.fastq.gz	Illumina WGS	HG002	Benchmark PSVGT on short reads
HG002	ftp://ftp-trace.ncbi.nlm.nih.gov/ReferenceSamples/giab/data/AshkenazimTrio/HG002_NA24385_son/NIST_HiSeq_HG002_Homogeneity-10953946/HG002_HiSeq300x_fastq/140616_D00360_0029_BHA2WPADXX/Project_RM8391_RM8392/Sample_2D2/2D2_GTCCGC_L002_R1_001.fastq.gz	Illumina WGS	HG002	Benchmark PSVGT on short reads
HG002	ftp://ftp-trace.ncbi.nlm.nih.gov/ReferenceSamples/giab/data/AshkenazimTrio/HG002_NA24385_son/NIST_HiSeq_HG002_Homogeneity-10953946/HG002_HiSeq300x_fastq/140616_D00360_0029_BHA2WPADXX/Project_RM8391_RM8392/Sample_2D2/2D2_GTCCGC_L002_R1_002.fastq.gz	Illumina WGS	HG002	Benchmark PSVGT on short reads
HG002	ftp://ftp-trace.ncbi.nlm.nih.gov/ReferenceSamples/giab/data/AshkenazimTrio/HG002_NA24385_son/NIST_HiSeq_HG002_Homogeneity-10953946/HG002_HiSeq300x_fastq/140616_D00360_0029_BHA2WPADXX/Project_RM8391_RM8392/Sample_2F1/2F1_ACAGTG_L001_R1_001.fastq.gz	Illumina WGS	HG002	Benchmark PSVGT on short reads
HG002	ftp://ftp-trace.ncbi.nlm.nih.gov/ReferenceSamples/giab/data/AshkenazimTrio/HG002_NA24385_son/NIST_HiSeq_HG002_Homogeneity-10953946/HG002_HiSeq300x_fastq/140616_D00360_0029_BHA2WPADXX/Project_RM8391_RM8392/Sample_2F1/2F1_ACAGTG_L001_R1_002.fastq.gz	Illumina WGS	HG002	Benchmark PSVGT on short reads
HG002	ftp://ftp-trace.ncbi.nlm.nih.gov/ReferenceSamples/giab/data/AshkenazimTrio/HG002_NA24385_son/NIST_HiSeq_HG002_Homogeneity-10953946/HG002_HiSeq300x_fastq/140616_D00360_0029_BHA2WPADXX/Project_RM8391_RM8392/Sample_2F1/2F1_ACAGTG_L001_R1_003.fastq.gz	Illumina WGS	HG002	Benchmark PSVGT on short reads
HG002	ftp://ftp-trace.ncbi.nlm.nih.gov/ReferenceSamples/giab/data/AshkenazimTrio/HG002_NA24385_son/NIST_HiSeq_HG002_Homogeneity-10953946/HG002_HiSeq300x_fastq/140616_D00360_0029_BHA2WPADXX/Project_RM8391_RM8392/Sample_2F1/2F1_ACAGTG_L001_R1_004.fastq.gz	Illumina WGS	HG002	Benchmark PSVGT on short reads
HG002	ftp://ftp-trace.ncbi.nlm.nih.gov/ReferenceSamples/giab/data/AshkenazimTrio/HG002_NA24385_son/NIST_HiSeq_HG002_Homogeneity-10953946/HG002_HiSeq300x_fastq/140616_D00360_0029_BHA2WPADXX/Project_RM8391_RM8392/Sample_2F1/2F1_ACAGTG_L001_R1_005.fastq.gz	Illumina WGS	HG002	Benchmark PSVGT on short reads
HG002	ftp://ftp-trace.ncbi.nlm.nih.gov/ReferenceSamples/giab/data/AshkenazimTrio/HG002_NA24385_son/NIST_HiSeq_HG002_Homogeneity-10953946/HG002_HiSeq300x_fastq/140616_D00360_0029_BHA2WPADXX/Project_RM8391_RM8392/Sample_2F1/2F1_ACAGTG_L001_R1_006.fastq.gz	Illumina WGS	HG002	Benchmark PSVGT on short reads
HG002	ftp://ftp-trace.ncbi.nlm.nih.gov/ReferenceSamples/giab/data/AshkenazimTrio/HG002_NA24385_son/NIST_HiSeq_HG002_Homogeneity-10953946/HG002_HiSeq300x_fastq/140616_D00360_0029_BHA2WPADXX/Project_RM8391_RM8392/Sample_2F1/2F1_ACAGTG_L002_R1_001.fastq.gz	Illumina WGS	HG002	Benchmark PSVGT on short reads
HG002	ftp://ftp-trace.ncbi.nlm.nih.gov/ReferenceSamples/giab/data/AshkenazimTrio/HG002_NA24385_son/NIST_HiSeq_HG002_Homogeneity-10953946/HG002_HiSeq300x_fastq/140616_D00360_0029_BHA2WPADXX/Project_RM8391_RM8392/Sample_2F1/2F1_ACAGTG_L002_R1_002.fastq.gz	Illumina WGS	HG002	Benchmark PSVGT on short reads
HG002	ftp://ftp-trace.ncbi.nlm.nih.gov/ReferenceSamples/giab/data/AshkenazimTrio/HG002_NA24385_son/NIST_HiSeq_HG002_Homogeneity-10953946/HG002_HiSeq300x_fastq/140616_D00360_0029_BHA2WPADXX/Project_RM8391_RM8392/Sample_2F1/2F1_ACAGTG_L002_R1_003.fastq.gz	Illumina WGS	HG002	Benchmark PSVGT on short reads
HG002	ftp://ftp-trace.ncbi.nlm.nih.gov/ReferenceSamples/giab/data/AshkenazimTrio/HG002_NA24385_son/NIST_HiSeq_HG002_Homogeneity-10953946/HG002_HiSeq300x_fastq/140616_D00360_0029_BHA2WPADXX/Project_RM8391_RM8392/Sample_2F1/2F1_ACAGTG_L002_R1_004.fastq.gz	Illumina WGS	HG002	Benchmark PSVGT on short reads
HG002	ftp://ftp-trace.ncbi.nlm.nih.gov/ReferenceSamples/giab/data/AshkenazimTrio/HG002_NA24385_son/NIST_HiSeq_HG002_Homogeneity-10953946/HG002_HiSeq300x_fastq/140616_D00360_0029_BHA2WPADXX/Project_RM8391_RM8392/Sample_2F1/2F1_ACAGTG_L002_R1_005.fastq.gz	Illumina WGS	HG002	Benchmark PSVGT on short reads
HG002	ftp://ftp-trace.ncbi.nlm.nih.gov/ReferenceSamples/giab/data/AshkenazimTrio/HG002_NA24385_son/NIST_HiSeq_HG002_Homogeneity-10953946/HG002_HiSeq300x_fastq/140616_D00360_0029_BHA2WPADXX/Project_RM8391_RM8392/Sample_2F1/2F1_ACAGTG_L002_R1_006.fastq.gz	Illumina WGS	HG002	Benchmark PSVGT on short reads
HG002	ftp://ftp-trace.ncbi.nlm.nih.gov/ReferenceSamples/giab/data/AshkenazimTrio/HG002_NA24385_son/NIST_HiSeq_HG002_Homogeneity-10953946/HG002_HiSeq300x_fastq/140616_D00360_0029_BHA2WPADXX/Project_RM8391_RM8392/Sample_2F2/2F2_GCCAAT_L001_R1_001.fastq.gz	Illumina WGS	HG002	Benchmark PSVGT on short reads
HG002	ftp://ftp-trace.ncbi.nlm.nih.gov/ReferenceSamples/giab/data/AshkenazimTrio/HG002_NA24385_son/NIST_HiSeq_HG002_Homogeneity-10953946/HG002_HiSeq300x_fastq/140616_D00360_0029_BHA2WPADXX/Project_RM8391_RM8392/Sample_2F2/2F2_GCCAAT_L001_R1_002.fastq.gz	Illumina WGS	HG002	Benchmark PSVGT on short reads
HG002	ftp://ftp-trace.ncbi.nlm.nih.gov/ReferenceSamples/giab/data/AshkenazimTrio/HG002_NA24385_son/NIST_HiSeq_HG002_Homogeneity-10953946/HG002_HiSeq300x_fastq/140616_D00360_0029_BHA2WPADXX/Project_RM8391_RM8392/Sample_2F2/2F2_GCCAAT_L001_R1_003.fastq.gz	Illumina WGS	HG002	Benchmark PSVGT on short reads
HG002	ftp://ftp-trace.ncbi.nlm.nih.gov/ReferenceSamples/giab/data/AshkenazimTrio/HG002_NA24385_son/NIST_HiSeq_HG002_Homogeneity-10953946/HG002_HiSeq300x_fastq/140616_D00360_0029_BHA2WPADXX/Project_RM8391_RM8392/Sample_2F2/2F2_GCCAAT_L001_R1_004.fastq.gz	Illumina WGS	HG002	Benchmark PSVGT on short reads
HG002	ftp://ftp-trace.ncbi.nlm.nih.gov/ReferenceSamples/giab/data/AshkenazimTrio/HG002_NA24385_son/NIST_HiSeq_HG002_Homogeneity-10953946/HG002_HiSeq300x_fastq/140616_D00360_0029_BHA2WPADXX/Project_RM8391_RM8392/Sample_2F2/2F2_GCCAAT_L001_R1_005.fastq.gz	Illumina WGS	HG002	Benchmark PSVGT on short reads
HG002	ftp://ftp-trace.ncbi.nlm.nih.gov/ReferenceSamples/giab/data/AshkenazimTrio/HG002_NA24385_son/NIST_HiSeq_HG002_Homogeneity-10953946/HG002_HiSeq300x_fastq/140616_D00360_0029_BHA2WPADXX/Project_RM8391_RM8392/Sample_2F2/2F2_GCCAAT_L001_R1_006.fastq.gz	Illumina WGS	HG002	Benchmark PSVGT on short reads
HG002	ftp://ftp-trace.ncbi.nlm.nih.gov/ReferenceSamples/giab/data/AshkenazimTrio/HG002_NA24385_son/NIST_HiSeq_HG002_Homogeneity-10953946/HG002_HiSeq300x_fastq/140616_D00360_0029_BHA2WPADXX/Project_RM8391_RM8392/Sample_2F2/2F2_GCCAAT_L002_R1_001.fastq.gz	Illumina WGS	HG002	Benchmark PSVGT on short reads
HG002	ftp://ftp-trace.ncbi.nlm.nih.gov/ReferenceSamples/giab/data/AshkenazimTrio/HG002_NA24385_son/NIST_HiSeq_HG002_Homogeneity-10953946/HG002_HiSeq300x_fastq/140616_D00360_0029_BHA2WPADXX/Project_RM8391_RM8392/Sample_2F2/2F2_GCCAAT_L002_R1_002.fastq.gz	Illumina WGS	HG002	Benchmark PSVGT on short reads
HG002	ftp://ftp-trace.ncbi.nlm.nih.gov/ReferenceSamples/giab/data/AshkenazimTrio/HG002_NA24385_son/NIST_HiSeq_HG002_Homogeneity-10953946/HG002_HiSeq300x_fastq/140616_D00360_0029_BHA2WPADXX/Project_RM8391_RM8392/Sample_2F2/2F2_GCCAAT_L002_R1_003.fastq.gz	Illumina WGS	HG002	Benchmark PSVGT on short reads
HG002	ftp://ftp-trace.ncbi.nlm.nih.gov/ReferenceSamples/giab/data/AshkenazimTrio/HG002_NA24385_son/NIST_HiSeq_HG002_Homogeneity-10953946/HG002_HiSeq300x_fastq/140616_D00360_0029_BHA2WPADXX/Project_RM8391_RM8392/Sample_2F2/2F2_GCCAAT_L002_R1_004.fastq.gz	Illumina WGS	HG002	Benchmark PSVGT on short reads
HG002	ftp://ftp-trace.ncbi.nlm.nih.gov/ReferenceSamples/giab/data/AshkenazimTrio/HG002_NA24385_son/NIST_HiSeq_HG002_Homogeneity-10953946/HG002_HiSeq300x_fastq/140616_D00360_0029_BHA2WPADXX/Project_RM8391_RM8392/Sample_2F2/2F2_GCCAAT_L002_R1_005.fastq.gz	Illumina WGS	HG002	Benchmark PSVGT on short reads
HG002	ftp://ftp-trace.ncbi.nlm.nih.gov/ReferenceSamples/giab/data/AshkenazimTrio/HG002_NA24385_son/NIST_HiSeq_HG002_Homogeneity-10953946/HG002_HiSeq300x_fastq/140616_D00360_0029_BHA2WPADXX/Project_RM8391_RM8392/Sample_2F2/2F2_GCCAAT_L002_R1_006.fastq.gz	Illumina WGS	HG002	Benchmark PSVGT on short reads
HG002	ftp://ftp-trace.ncbi.nlm.nih.gov/ReferenceSamples/giab/data/AshkenazimTrio/HG002_NA24385_son/NIST_HiSeq_HG002_Homogeneity-10953946/HG002_HiSeq300x_fastq/140616_D00360_0029_BHA2WPADXX/Project_RM8391_RM8392/Sample_2L1/2L1_CTTGTA_L001_R1_001.fastq.gz	Illumina WGS	HG002	Benchmark PSVGT on short reads
HG002	ftp://ftp-trace.ncbi.nlm.nih.gov/ReferenceSamples/giab/data/AshkenazimTrio/HG002_NA24385_son/NIST_HiSeq_HG002_Homogeneity-10953946/HG002_HiSeq300x_fastq/140616_D00360_0029_BHA2WPADXX/Project_RM8391_RM8392/Sample_2L1/2L1_CTTGTA_L001_R1_002.fastq.gz	Illumina WGS	HG002	Benchmark PSVGT on short reads
HG002	ftp://ftp-trace.ncbi.nlm.nih.gov/ReferenceSamples/giab/data/AshkenazimTrio/HG002_NA24385_son/NIST_HiSeq_HG002_Homogeneity-10953946/HG002_HiSeq300x_fastq/140616_D00360_0029_BHA2WPADXX/Project_RM8391_RM8392/Sample_2L1/2L1_CTTGTA_L001_R1_003.fastq.gz	Illumina WGS	HG002	Benchmark PSVGT on short reads
HG002	ftp://ftp-trace.ncbi.nlm.nih.gov/ReferenceSamples/giab/data/AshkenazimTrio/HG002_NA24385_son/NIST_HiSeq_HG002_Homogeneity-10953946/HG002_HiSeq300x_fastq/140616_D00360_0029_BHA2WPADXX/Project_RM8391_RM8392/Sample_2L1/2L1_CTTGTA_L001_R1_004.fastq.gz	Illumina WGS	HG002	Benchmark PSVGT on short reads
HG002	ftp://ftp-trace.ncbi.nlm.nih.gov/ReferenceSamples/giab/data/AshkenazimTrio/HG002_NA24385_son/NIST_HiSeq_HG002_Homogeneity-10953946/HG002_HiSeq300x_fastq/140616_D00360_0029_BHA2WPADXX/Project_RM8391_RM8392/Sample_2L1/2L1_CTTGTA_L001_R1_005.fastq.gz	Illumina WGS	HG002	Benchmark PSVGT on short reads
HG002	ftp://ftp-trace.ncbi.nlm.nih.gov/ReferenceSamples/giab/data/AshkenazimTrio/HG002_NA24385_son/NIST_HiSeq_HG002_Homogeneity-10953946/HG002_HiSeq300x_fastq/140616_D00360_0029_BHA2WPADXX/Project_RM8391_RM8392/Sample_2L1/2L1_CTTGTA_L001_R1_006.fastq.gz	Illumina WGS	HG002	Benchmark PSVGT on short reads
HG002	ftp://ftp-trace.ncbi.nlm.nih.gov/ReferenceSamples/giab/data/AshkenazimTrio/HG002_NA24385_son/NIST_HiSeq_HG002_Homogeneity-10953946/HG002_HiSeq300x_fastq/140616_D00360_0029_BHA2WPADXX/Project_RM8391_RM8392/Sample_2L1/2L1_CTTGTA_L002_R1_001.fastq.gz	Illumina WGS	HG002	Benchmark PSVGT on short reads
HG002	ftp://ftp-trace.ncbi.nlm.nih.gov/ReferenceSamples/giab/data/AshkenazimTrio/HG002_NA24385_son/NIST_HiSeq_HG002_Homogeneity-10953946/HG002_HiSeq300x_fastq/140616_D00360_0029_BHA2WPADXX/Project_RM8391_RM8392/Sample_2L1/2L1_CTTGTA_L002_R1_002.fastq.gz	Illumina WGS	HG002	Benchmark PSVGT on short reads
HG002	ftp://ftp-trace.ncbi.nlm.nih.gov/ReferenceSamples/giab/data/AshkenazimTrio/HG002_NA24385_son/NIST_HiSeq_HG002_Homogeneity-10953946/HG002_HiSeq300x_fastq/140616_D00360_0029_BHA2WPADXX/Project_RM8391_RM8392/Sample_2L1/2L1_CTTGTA_L002_R1_003.fastq.gz	Illumina WGS	HG002	Benchmark PSVGT on short reads
HG002	ftp://ftp-trace.ncbi.nlm.nih.gov/ReferenceSamples/giab/data/AshkenazimTrio/HG002_NA24385_son/NIST_HiSeq_HG002_Homogeneity-10953946/HG002_HiSeq300x_fastq/140616_D00360_0029_BHA2WPADXX/Project_RM8391_RM8392/Sample_2L1/2L1_CTTGTA_L002_R1_004.fastq.gz	Illumina WGS	HG002	Benchmark PSVGT on short reads
HG002	ftp://ftp-trace.ncbi.nlm.nih.gov/ReferenceSamples/giab/data/AshkenazimTrio/HG002_NA24385_son/NIST_HiSeq_HG002_Homogeneity-10953946/HG002_HiSeq300x_fastq/140616_D00360_0029_BHA2WPADXX/Project_RM8391_RM8392/Sample_2L1/2L1_CTTGTA_L002_R1_005.fastq.gz	Illumina WGS	HG002	Benchmark PSVGT on short reads
HG002	ftp://ftp-trace.ncbi.nlm.nih.gov/ReferenceSamples/giab/data/AshkenazimTrio/HG002_NA24385_son/NIST_HiSeq_HG002_Homogeneity-10953946/HG002_HiSeq300x_fastq/140616_D00360_0029_BHA2WPADXX/Project_RM8391_RM8392/Sample_2L1/2L1_CTTGTA_L002_R1_006.fastq.gz	Illumina WGS	HG002	Benchmark PSVGT on short reads
HG002	ftp://ftp-trace.ncbi.nlm.nih.gov/ReferenceSamples/giab/data/AshkenazimTrio/HG002_NA24385_son/NIST_HiSeq_HG002_Homogeneity-10953946/HG002_HiSeq300x_fastq/140616_D00360_0029_BHA2WPADXX/Project_RM8391_RM8392/Sample_2L2/2L2_GTGAAA_L001_R1_001.fastq.gz	Illumina WGS	HG002	Benchmark PSVGT on short reads
HG002	ftp://ftp-trace.ncbi.nlm.nih.gov/ReferenceSamples/giab/data/AshkenazimTrio/HG002_NA24385_son/NIST_HiSeq_HG002_Homogeneity-10953946/HG002_HiSeq300x_fastq/140616_D00360_0029_BHA2WPADXX/Project_RM8391_RM8392/Sample_2L2/2L2_GTGAAA_L001_R1_002.fastq.gz	Illumina WGS	HG002	Benchmark PSVGT on short reads
HG002	ftp://ftp-trace.ncbi.nlm.nih.gov/ReferenceSamples/giab/data/AshkenazimTrio/HG002_NA24385_son/NIST_HiSeq_HG002_Homogeneity-10953946/HG002_HiSeq300x_fastq/140616_D00360_0029_BHA2WPADXX/Project_RM8391_RM8392/Sample_2L2/2L2_GTGAAA_L001_R1_003.fastq.gz	Illumina WGS	HG002	Benchmark PSVGT on short reads
HG002	ftp://ftp-trace.ncbi.nlm.nih.gov/ReferenceSamples/giab/data/AshkenazimTrio/HG002_NA24385_son/NIST_HiSeq_HG002_Homogeneity-10953946/HG002_HiSeq300x_fastq/140616_D00360_0029_BHA2WPADXX/Project_RM8391_RM8392/Sample_2L2/2L2_GTGAAA_L001_R1_004.fastq.gz	Illumina WGS	HG002	Benchmark PSVGT on short reads
HG002	ftp://ftp-trace.ncbi.nlm.nih.gov/ReferenceSamples/giab/data/AshkenazimTrio/HG002_NA24385_son/NIST_HiSeq_HG002_Homogeneity-10953946/HG002_HiSeq300x_fastq/140616_D00360_0029_BHA2WPADXX/Project_RM8391_RM8392/Sample_2L2/2L2_GTGAAA_L001_R1_005.fastq.gz	Illumina WGS	HG002	Benchmark PSVGT on short reads
HG002	ftp://ftp-trace.ncbi.nlm.nih.gov/ReferenceSamples/giab/data/AshkenazimTrio/HG002_NA24385_son/NIST_HiSeq_HG002_Homogeneity-10953946/HG002_HiSeq300x_fastq/140616_D00360_0029_BHA2WPADXX/Project_RM8391_RM8392/Sample_2L2/2L2_GTGAAA_L001_R1_006.fastq.gz	Illumina WGS	HG002	Benchmark PSVGT on short reads
HG002	ftp://ftp-trace.ncbi.nlm.nih.gov/ReferenceSamples/giab/data/AshkenazimTrio/HG002_NA24385_son/NIST_HiSeq_HG002_Homogeneity-10953946/HG002_HiSeq300x_fastq/140616_D00360_0029_BHA2WPADXX/Project_RM8391_RM8392/Sample_2L2/2L2_GTGAAA_L002_R1_001.fastq.gz	Illumina WGS	HG002	Benchmark PSVGT on short reads
HG002	ftp://ftp-trace.ncbi.nlm.nih.gov/ReferenceSamples/giab/data/AshkenazimTrio/HG002_NA24385_son/NIST_HiSeq_HG002_Homogeneity-10953946/HG002_HiSeq300x_fastq/140616_D00360_0029_BHA2WPADXX/Project_RM8391_RM8392/Sample_2L2/2L2_GTGAAA_L002_R1_002.fastq.gz	Illumina WGS	HG002	Benchmark PSVGT on short reads
HG002	ftp://ftp-trace.ncbi.nlm.nih.gov/ReferenceSamples/giab/data/AshkenazimTrio/HG002_NA24385_son/NIST_HiSeq_HG002_Homogeneity-10953946/HG002_HiSeq300x_fastq/140616_D00360_0029_BHA2WPADXX/Project_RM8391_RM8392/Sample_2L2/2L2_GTGAAA_L002_R1_003.fastq.gz	Illumina WGS	HG002	Benchmark PSVGT on short reads
HG002	ftp://ftp-trace.ncbi.nlm.nih.gov/ReferenceSamples/giab/data/AshkenazimTrio/HG002_NA24385_son/NIST_HiSeq_HG002_Homogeneity-10953946/HG002_HiSeq300x_fastq/140616_D00360_0029_BHA2WPADXX/Project_RM8391_RM8392/Sample_2L2/2L2_GTGAAA_L002_R1_004.fastq.gz	Illumina WGS	HG002	Benchmark PSVGT on short reads
HG002	ftp://ftp-trace.ncbi.nlm.nih.gov/ReferenceSamples/giab/data/AshkenazimTrio/HG002_NA24385_son/NIST_HiSeq_HG002_Homogeneity-10953946/HG002_HiSeq300x_fastq/140616_D00360_0029_BHA2WPADXX/Project_RM8391_RM8392/Sample_2L2/2L2_GTGAAA_L002_R1_005.fastq.gz	Illumina WGS	HG002	Benchmark PSVGT on short reads
HG002	ftp://ftp-trace.ncbi.nlm.nih.gov/ReferenceSamples/giab/data/AshkenazimTrio/HG002_NA24385_son/NIST_HiSeq_HG002_Homogeneity-10953946/HG002_HiSeq300x_fastq/140616_D00360_0029_BHA2WPADXX/Project_RM8391_RM8392/Sample_2L2/2L2_GTGAAA_L002_R1_006.fastq.gz	Illumina WGS	HG002	Benchmark PSVGT on short reads
HG002	https://sra-pub-src-2.s3.amazonaws.com/SRR10382245/m64011_190830_220126.fastq.1	PacBio CCS	HG002	Benchmark HG002 on long reads
HG002	https://sra-pub-src-2.s3.amazonaws.com/SRR10382244/m64011_190901_095311.fastq.1	PacBio CCS	HG002	Benchmark HG002 on long reads
HG002	https://sra-pub-src-2.s3.amazonaws.com/SRR10382249/m64012_190920_173625.fastq.1	PacBio CCS	HG002	Benchmark HG002 on long reads
HG002	https://sra-pub-src-2.s3.amazonaws.com/SRR10382248/m64012_190921_234837.fastq.1	PacBio CCS	HG002	Benchmark HG002 on long reads
HG002	https://sra-pub-src-2.s3.amazonaws.com/SRR10382247/m64015_190920_185703.fastq.1	PacBio CCS	HG002	Benchmark HG002 on long reads
HG002	https://sra-pub-src-2.s3.amazonaws.com/SRR10382246/m64015_190922_010918.fastq.1	PacBio CCS	HG002	Benchmark HG002 on long reads
HG002	ftp://ftp-trace.ncbi.nlm.nih.gov/ReferenceSamples/giab/data/AshkenazimTrio/HG002_NA24385_son/UCSC_Ultralong_OxfordNanopore_Promethion/GM24385_1.fastq.gz	Oxford Nanopore ultralong Promethion	HG002	Benchmark HG002 on long reads
HG002	ftp://ftp-trace.ncbi.nlm.nih.gov/ReferenceSamples/giab/data/AshkenazimTrio/HG002_NA24385_son/UCSC_Ultralong_OxfordNanopore_Promethion/GM24385_2.fastq.gz	Oxford Nanopore ultralong Promethion	HG002	Benchmark HG002 on long reads
HG002	ftp://ftp-trace.ncbi.nlm.nih.gov/ReferenceSamples/giab/data/AshkenazimTrio/HG002_NA24385_son/UCSC_Ultralong_OxfordNanopore_Promethion/GM24385_3.fastq.gz	Oxford Nanopore ultralong Promethion	HG002	Benchmark HG002 on long reads
HG002	ftp://ftp-trace.ncbi.nlm.nih.gov/ReferenceSamples/giab/data/AshkenazimTrio/HG002_NA24385_son/PacBio_MtSinai_NIST/PacBio_fasta/m140612_020550_42156.subreads.fasta.gz	PacBio CLR	HG002	Benchmark HG002 on long reads
HG002	ftp://ftp-trace.ncbi.nlm.nih.gov/ReferenceSamples/giab/data/AshkenazimTrio/HG002_NA24385_son/PacBio_MtSinai_NIST/PacBio_fasta/m140612_082500_42156.subreads.fasta.gz	PacBio CLR	HG002	Benchmark HG002 on long reads
HG002	ftp://ftp-trace.ncbi.nlm.nih.gov/ReferenceSamples/giab/data/AshkenazimTrio/HG002_NA24385_son/PacBio_MtSinai_NIST/PacBio_fasta/m140614_092436_42156.subreads.fasta.gz	PacBio CLR	HG002	Benchmark HG002 on long reads
HG002	ftp://ftp-trace.ncbi.nlm.nih.gov/ReferenceSamples/giab/data/AshkenazimTrio/HG002_NA24385_son/PacBio_MtSinai_NIST/PacBio_fasta/m140614_154356_42156.subreads.fasta.gz	PacBio CLR	HG002	Benchmark HG002 on long reads
HG002	ftp://ftp-trace.ncbi.nlm.nih.gov/ReferenceSamples/giab/data/AshkenazimTrio/HG002_NA24385_son/PacBio_MtSinai_NIST/PacBio_fasta/m141004_003611_42156.subreads.fasta.gz	PacBio CLR	HG002	Benchmark HG002 on long reads
HG002	ftp://ftp-trace.ncbi.nlm.nih.gov/ReferenceSamples/giab/data/AshkenazimTrio/HG002_NA24385_son/PacBio_MtSinai_NIST/PacBio_fasta/m141004_065519_42156.subreads.fasta.gz	PacBio CLR	HG002	Benchmark HG002 on long reads
HG002	ftp://ftp-trace.ncbi.nlm.nih.gov/ReferenceSamples/giab/data/AshkenazimTrio/HG002_NA24385_son/PacBio_MtSinai_NIST/PacBio_fasta/m141007_105101_42156.subreads.fasta.gz	PacBio CLR	HG002	Benchmark HG002 on long reads
HG002	ftp://ftp-trace.ncbi.nlm.nih.gov/ReferenceSamples/giab/data/AshkenazimTrio/HG002_NA24385_son/PacBio_MtSinai_NIST/PacBio_fasta/m141007_170730_42156.subreads.fasta.gz	PacBio CLR	HG002	Benchmark HG002 on long reads
HG002	ftp://ftp-trace.ncbi.nlm.nih.gov/ReferenceSamples/giab/data/AshkenazimTrio/HG002_NA24385_son/PacBio_MtSinai_NIST/PacBio_fasta/m141007_232646_42156.subreads.fasta.gz	PacBio CLR	HG002	Benchmark HG002 on long reads
HG002	ftp://ftp-trace.ncbi.nlm.nih.gov/ReferenceSamples/giab/data/AshkenazimTrio/HG002_NA24385_son/PacBio_MtSinai_NIST/PacBio_fasta/m141008_054919_42156.subreads.fasta.gz	PacBio CLR	HG002	Benchmark HG002 on long reads
HG002	ftp://ftp-trace.ncbi.nlm.nih.gov/ReferenceSamples/giab/data/AshkenazimTrio/HG002_NA24385_son/PacBio_MtSinai_NIST/PacBio_fasta/m141008_121115_42156.subreads.fasta.gz	PacBio CLR	HG002	Benchmark HG002 on long reads
HG002	ftp://ftp-trace.ncbi.nlm.nih.gov/ReferenceSamples/giab/data/AshkenazimTrio/HG002_NA24385_son/PacBio_MtSinai_NIST/PacBio_fasta/m141008_135459_42177.subreads.fasta.gz	PacBio CLR	HG002	Benchmark HG002 on long reads
HG002	ftp://ftp-trace.ncbi.nlm.nih.gov/ReferenceSamples/giab/data/AshkenazimTrio/HG002_NA24385_son/PacBio_MtSinai_NIST/PacBio_fasta/m141008_201617_42177.subreads.fasta.gz	PacBio CLR	HG002	Benchmark HG002 on long reads
HG002	ftp://ftp-trace.ncbi.nlm.nih.gov/ReferenceSamples/giab/data/AshkenazimTrio/HG002_NA24385_son/PacBio_MtSinai_NIST/PacBio_fasta/m141012_032032_42177.subreads.fasta.gz	PacBio CLR	HG002	Benchmark HG002 on long reads
HG002	ftp://ftp-trace.ncbi.nlm.nih.gov/ReferenceSamples/giab/data/AshkenazimTrio/HG002_NA24385_son/PacBio_MtSinai_NIST/PacBio_fasta/m141012_093908_42177.subreads.fasta.gz	PacBio CLR	HG002	Benchmark HG002 on long reads
HG002	ftp://ftp-trace.ncbi.nlm.nih.gov/ReferenceSamples/giab/data/AshkenazimTrio/HG002_NA24385_son/PacBio_MtSinai_NIST/PacBio_fasta/m141012_160036_42177.subreads.fasta.gz	PacBio CLR	HG002	Benchmark HG002 on long reads
HG002	ftp://ftp-trace.ncbi.nlm.nih.gov/ReferenceSamples/giab/data/AshkenazimTrio/HG002_NA24385_son/PacBio_MtSinai_NIST/PacBio_fasta/m141114_203257_42156.subreads.fasta.gz	PacBio CLR	HG002	Benchmark HG002 on long reads
HG002	ftp://ftp-trace.ncbi.nlm.nih.gov/ReferenceSamples/giab/data/AshkenazimTrio/HG002_NA24385_son/PacBio_MtSinai_NIST/PacBio_fasta/m141115_025211_42156.subreads.fasta.gz	PacBio CLR	HG002	Benchmark HG002 on long reads
HG002	ftp://ftp-trace.ncbi.nlm.nih.gov/ReferenceSamples/giab/data/AshkenazimTrio/HG002_NA24385_son/PacBio_MtSinai_NIST/PacBio_fasta/m141118_043300_42156.subreads.fasta.gz	PacBio CLR	HG002	Benchmark HG002 on long reads
HG002	ftp://ftp-trace.ncbi.nlm.nih.gov/ReferenceSamples/giab/data/AshkenazimTrio/HG002_NA24385_son/PacBio_MtSinai_NIST/PacBio_fasta/m141118_105052_42156.subreads.fasta.gz	PacBio CLR	HG002	Benchmark HG002 on long reads
HG002	ftp://ftp-trace.ncbi.nlm.nih.gov/ReferenceSamples/giab/data/AshkenazimTrio/HG002_NA24385_son/PacBio_MtSinai_NIST/PacBio_fasta/m141118_171015_42156.subreads.fasta.gz	PacBio CLR	HG002	Benchmark HG002 on long reads
HG002	ftp://ftp-trace.ncbi.nlm.nih.gov/ReferenceSamples/giab/data/AshkenazimTrio/HG002_NA24385_son/PacBio_MtSinai_NIST/PacBio_fasta/m141118_232934_42156.subreads.fasta.gz	PacBio CLR	HG002	Benchmark HG002 on long reads
HG002	ftp://ftp-trace.ncbi.nlm.nih.gov/ReferenceSamples/giab/data/AshkenazimTrio/HG002_NA24385_son/PacBio_MtSinai_NIST/PacBio_fasta/m141119_234821_42156.subreads.fasta.gz	PacBio CLR	HG002	Benchmark HG002 on long reads
HG002	ftp://ftp-trace.ncbi.nlm.nih.gov/ReferenceSamples/giab/data/AshkenazimTrio/HG002_NA24385_son/PacBio_MtSinai_NIST/PacBio_fasta/m141120_060729_42156.subreads.fasta.gz	PacBio CLR	HG002	Benchmark HG002 on long reads
HG002	ftp://ftp-trace.ncbi.nlm.nih.gov/ReferenceSamples/giab/data/AshkenazimTrio/HG002_NA24385_son/PacBio_MtSinai_NIST/PacBio_fasta/m141120_122856_42156.subreads.fasta.gz	PacBio CLR	HG002	Benchmark HG002 on long reads
HG002	ftp://ftp-trace.ncbi.nlm.nih.gov/ReferenceSamples/giab/data/AshkenazimTrio/HG002_NA24385_son/PacBio_MtSinai_NIST/PacBio_fasta/m141120_184610_42156.subreads.fasta.gz	PacBio CLR	HG002	Benchmark HG002 on long reads
HG002	ftp://ftp-trace.ncbi.nlm.nih.gov/ReferenceSamples/giab/data/AshkenazimTrio/HG002_NA24385_son/PacBio_MtSinai_NIST/PacBio_fasta/m141121_041751_42156.subreads.fasta.gz	PacBio CLR	HG002	Benchmark HG002 on long reads
HG002	ftp://ftp-trace.ncbi.nlm.nih.gov/ReferenceSamples/giab/data/AshkenazimTrio/HG002_NA24385_son/PacBio_MtSinai_NIST/PacBio_fasta/m141121_103624_42156.subreads.fasta.gz	PacBio CLR	HG002	Benchmark HG002 on long reads
HG002	ftp://ftp-trace.ncbi.nlm.nih.gov/ReferenceSamples/giab/data/AshkenazimTrio/HG002_NA24385_son/PacBio_MtSinai_NIST/PacBio_fasta/m141121_165532_42156.subreads.fasta.gz	PacBio CLR	HG002	Benchmark HG002 on long reads
HG002	ftp://ftp-trace.ncbi.nlm.nih.gov/ReferenceSamples/giab/data/AshkenazimTrio/HG002_NA24385_son/PacBio_MtSinai_NIST/PacBio_fasta/m141121_231437_42156.subreads.fasta.gz	PacBio CLR	HG002	Benchmark HG002 on long reads
HG002	ftp://ftp-trace.ncbi.nlm.nih.gov/ReferenceSamples/giab/data/AshkenazimTrio/HG002_NA24385_son/PacBio_MtSinai_NIST/PacBio_fasta/m141124_065146_42156.subreads.fasta.gz	PacBio CLR	HG002	Benchmark HG002 on long reads
HG002	ftp://ftp-trace.ncbi.nlm.nih.gov/ReferenceSamples/giab/data/AshkenazimTrio/HG002_NA24385_son/PacBio_MtSinai_NIST/PacBio_fasta/m141124_131042_42156.subreads.fasta.gz	PacBio CLR	HG002	Benchmark HG002 on long reads
HG002	ftp://ftp-trace.ncbi.nlm.nih.gov/ReferenceSamples/giab/data/AshkenazimTrio/HG002_NA24385_son/PacBio_MtSinai_NIST/PacBio_fasta/m141124_192948_42156.subreads.fasta.gz	PacBio CLR	HG002	Benchmark HG002 on long reads
HG002	ftp://ftp-trace.ncbi.nlm.nih.gov/ReferenceSamples/giab/data/AshkenazimTrio/HG002_NA24385_son/PacBio_MtSinai_NIST/PacBio_fasta/m141125_014852_42156.subreads.fasta.gz	PacBio CLR	HG002	Benchmark HG002 on long reads
HG002	ftp://ftp-trace.ncbi.nlm.nih.gov/ReferenceSamples/giab/data/AshkenazimTrio/HG002_NA24385_son/PacBio_MtSinai_NIST/PacBio_fasta/m141125_080805_42156.subreads.fasta.gz	PacBio CLR	HG002	Benchmark HG002 on long reads
HG002	ftp://ftp-trace.ncbi.nlm.nih.gov/ReferenceSamples/giab/data/AshkenazimTrio/HG002_NA24385_son/PacBio_MtSinai_NIST/PacBio_fasta/m141125_142738_42156.subreads.fasta.gz	PacBio CLR	HG002	Benchmark HG002 on long reads
HG002	ftp://ftp-trace.ncbi.nlm.nih.gov/ReferenceSamples/giab/data/AshkenazimTrio/HG002_NA24385_son/PacBio_MtSinai_NIST/PacBio_fasta/m141126_040754_42156.subreads.fasta.gz	PacBio CLR	HG002	Benchmark HG002 on long reads
HG002	ftp://ftp-trace.ncbi.nlm.nih.gov/ReferenceSamples/giab/data/AshkenazimTrio/HG002_NA24385_son/PacBio_MtSinai_NIST/PacBio_fasta/m141126_102554_42156.subreads.fasta.gz	PacBio CLR	HG002	Benchmark HG002 on long reads
HG002	ftp://ftp-trace.ncbi.nlm.nih.gov/ReferenceSamples/giab/data/AshkenazimTrio/HG002_NA24385_son/PacBio_MtSinai_NIST/PacBio_fasta/m141126_164454_42156.subreads.fasta.gz	PacBio CLR	HG002	Benchmark HG002 on long reads
HG002	ftp://ftp-trace.ncbi.nlm.nih.gov/ReferenceSamples/giab/data/AshkenazimTrio/HG002_NA24385_son/PacBio_MtSinai_NIST/PacBio_fasta/m141126_230423_42156.subreads.fasta.gz	PacBio CLR	HG002	Benchmark HG002 on long reads
HG002	ftp://ftp-trace.ncbi.nlm.nih.gov/ReferenceSamples/giab/data/AshkenazimTrio/HG002_NA24385_son/PacBio_MtSinai_NIST/PacBio_fasta/m141129_070930_42156.subreads.fasta.gz	PacBio CLR	HG002	Benchmark HG002 on long reads
HG002	ftp://ftp-trace.ncbi.nlm.nih.gov/ReferenceSamples/giab/data/AshkenazimTrio/HG002_NA24385_son/PacBio_MtSinai_NIST/PacBio_fasta/m141129_132748_42156.subreads.fasta.gz	PacBio CLR	HG002	Benchmark HG002 on long reads
HG002	ftp://ftp-trace.ncbi.nlm.nih.gov/ReferenceSamples/giab/data/AshkenazimTrio/HG002_NA24385_son/PacBio_MtSinai_NIST/PacBio_fasta/m141129_194859_42156.subreads.fasta.gz	PacBio CLR	HG002	Benchmark HG002 on long reads
HG002	ftp://ftp-trace.ncbi.nlm.nih.gov/ReferenceSamples/giab/data/AshkenazimTrio/HG002_NA24385_son/PacBio_MtSinai_NIST/PacBio_fasta/m141130_020554_42156.subreads.fasta.gz	PacBio CLR	HG002	Benchmark HG002 on long reads
HG002	ftp://ftp-trace.ncbi.nlm.nih.gov/ReferenceSamples/giab/data/AshkenazimTrio/HG002_NA24385_son/PacBio_MtSinai_NIST/PacBio_fasta/m141130_082727_42156.subreads.fasta.gz	PacBio CLR	HG002	Benchmark HG002 on long reads
HG002	ftp://ftp-trace.ncbi.nlm.nih.gov/ReferenceSamples/giab/data/AshkenazimTrio/HG002_NA24385_son/PacBio_MtSinai_NIST/PacBio_fasta/m141130_144724_42156.subreads.fasta.gz	PacBio CLR	HG002	Benchmark HG002 on long reads
HG002	ftp://ftp-trace.ncbi.nlm.nih.gov/ReferenceSamples/giab/data/AshkenazimTrio/HG002_NA24385_son/PacBio_MtSinai_NIST/PacBio_fasta/m141202_060128_42156.subreads.fasta.gz	PacBio CLR	HG002	Benchmark HG002 on long reads
HG002	ftp://ftp-trace.ncbi.nlm.nih.gov/ReferenceSamples/giab/data/AshkenazimTrio/HG002_NA24385_son/PacBio_MtSinai_NIST/PacBio_fasta/m141202_122138_42156.subreads.fasta.gz	PacBio CLR	HG002	Benchmark HG002 on long reads
HG002	ftp://ftp-trace.ncbi.nlm.nih.gov/ReferenceSamples/giab/data/AshkenazimTrio/HG002_NA24385_son/PacBio_MtSinai_NIST/PacBio_fasta/m141202_184002_42156.subreads.fasta.gz	PacBio CLR	HG002	Benchmark HG002 on long reads
HG002	ftp://ftp-trace.ncbi.nlm.nih.gov/ReferenceSamples/giab/data/AshkenazimTrio/HG002_NA24385_son/PacBio_MtSinai_NIST/PacBio_fasta/m141203_010033_42156.subreads.fasta.gz	PacBio CLR	HG002	Benchmark HG002 on long reads
HG002	ftp://ftp-trace.ncbi.nlm.nih.gov/ReferenceSamples/giab/data/AshkenazimTrio/HG002_NA24385_son/PacBio_MtSinai_NIST/PacBio_fasta/m141203_072135_42156.subreads.fasta.gz	PacBio CLR	HG002	Benchmark HG002 on long reads
HG002	ftp://ftp-trace.ncbi.nlm.nih.gov/ReferenceSamples/giab/data/AshkenazimTrio/HG002_NA24385_son/PacBio_MtSinai_NIST/PacBio_fasta/m141203_134235_42156.subreads.fasta.gz	PacBio CLR	HG002	Benchmark HG002 on long reads
HG002	ftp://ftp-trace.ncbi.nlm.nih.gov/ReferenceSamples/giab/data/AshkenazimTrio/HG002_NA24385_son/PacBio_MtSinai_NIST/PacBio_fasta/m141203_200625_42156.subreads.fasta.gz	PacBio CLR	HG002	Benchmark HG002 on long reads
HG002	ftp://ftp-trace.ncbi.nlm.nih.gov/ReferenceSamples/giab/data/AshkenazimTrio/HG002_NA24385_son/PacBio_MtSinai_NIST/PacBio_fasta/m141204_022607_42156.subreads.fasta.gz	PacBio CLR	HG002	Benchmark HG002 on long reads
HG002	ftp://ftp-trace.ncbi.nlm.nih.gov/ReferenceSamples/giab/data/AshkenazimTrio/HG002_NA24385_son/PacBio_MtSinai_NIST/PacBio_fasta/m141207_095219_42163.subreads.fasta.gz	PacBio CLR	HG002	Benchmark HG002 on long reads
HG002	ftp://ftp-trace.ncbi.nlm.nih.gov/ReferenceSamples/giab/data/AshkenazimTrio/HG002_NA24385_son/PacBio_MtSinai_NIST/PacBio_fasta/m141207_160908_42163.subreads.fasta.gz	PacBio CLR	HG002	Benchmark HG002 on long reads
HG002	ftp://ftp-trace.ncbi.nlm.nih.gov/ReferenceSamples/giab/data/AshkenazimTrio/HG002_NA24385_son/PacBio_MtSinai_NIST/PacBio_fasta/m141207_222838_42163.subreads.fasta.gz	PacBio CLR	HG002	Benchmark HG002 on long reads
HG002	ftp://ftp-trace.ncbi.nlm.nih.gov/ReferenceSamples/giab/data/AshkenazimTrio/HG002_NA24385_son/PacBio_MtSinai_NIST/PacBio_fasta/m141208_044734_42163.subreads.fasta.gz	PacBio CLR	HG002	Benchmark HG002 on long reads
HG002	ftp://ftp-trace.ncbi.nlm.nih.gov/ReferenceSamples/giab/data/AshkenazimTrio/HG002_NA24385_son/PacBio_MtSinai_NIST/PacBio_fasta/m141210_105204_42163.subreads.fasta.gz	PacBio CLR	HG002	Benchmark HG002 on long reads
HG002	ftp://ftp-trace.ncbi.nlm.nih.gov/ReferenceSamples/giab/data/AshkenazimTrio/HG002_NA24385_son/PacBio_MtSinai_NIST/PacBio_fasta/m141210_171117_42163.subreads.fasta.gz	PacBio CLR	HG002	Benchmark HG002 on long reads
HG002	ftp://ftp-trace.ncbi.nlm.nih.gov/ReferenceSamples/giab/data/AshkenazimTrio/HG002_NA24385_son/PacBio_MtSinai_NIST/PacBio_fasta/m141211_043339_42177.subreads.fasta.gz	PacBio CLR	HG002	Benchmark HG002 on long reads
HG002	ftp://ftp-trace.ncbi.nlm.nih.gov/ReferenceSamples/giab/data/AshkenazimTrio/HG002_NA24385_son/PacBio_MtSinai_NIST/PacBio_fasta/m141211_104910_42177.subreads.fasta.gz	PacBio CLR	HG002	Benchmark HG002 on long reads
HG002	ftp://ftp-trace.ncbi.nlm.nih.gov/ReferenceSamples/giab/data/AshkenazimTrio/HG002_NA24385_son/PacBio_MtSinai_NIST/PacBio_fasta/m141222_190327_42163.subreads.fasta.gz	PacBio CLR	HG002	Benchmark HG002 on long reads
HG002	ftp://ftp-trace.ncbi.nlm.nih.gov/ReferenceSamples/giab/data/AshkenazimTrio/HG002_NA24385_son/PacBio_MtSinai_NIST/PacBio_fasta/m141223_012647_42163.subreads.fasta.gz	PacBio CLR	HG002	Benchmark HG002 on long reads
HG002	ftp://ftp-trace.ncbi.nlm.nih.gov/ReferenceSamples/giab/data/AshkenazimTrio/HG002_NA24385_son/PacBio_MtSinai_NIST/PacBio_fasta/m141223_074153_42163.subreads.fasta.gz	PacBio CLR	HG002	Benchmark HG002 on long reads
HG002	ftp://ftp-trace.ncbi.nlm.nih.gov/ReferenceSamples/giab/data/AshkenazimTrio/HG002_NA24385_son/PacBio_MtSinai_NIST/PacBio_fasta/m141224_133842_42177.subreads.fasta.gz	PacBio CLR	HG002	Benchmark HG002 on long reads
HG002	ftp://ftp-trace.ncbi.nlm.nih.gov/ReferenceSamples/giab/data/AshkenazimTrio/HG002_NA24385_son/PacBio_MtSinai_NIST/PacBio_fasta/m141224_220915_42177.subreads.fasta.gz	PacBio CLR	HG002	Benchmark HG002 on long reads
HG002	ftp://ftp-trace.ncbi.nlm.nih.gov/ReferenceSamples/giab/data/AshkenazimTrio/HG002_NA24385_son/PacBio_MtSinai_NIST/PacBio_fasta/m141225_043134_42177.subreads.fasta.gz	PacBio CLR	HG002	Benchmark HG002 on long reads
HG002	ftp://ftp-trace.ncbi.nlm.nih.gov/ReferenceSamples/giab/data/AshkenazimTrio/HG002_NA24385_son/PacBio_MtSinai_NIST/PacBio_fasta/m141227_203142_42156.subreads.fasta.gz	PacBio CLR	HG002	Benchmark HG002 on long reads
HG002	ftp://ftp-trace.ncbi.nlm.nih.gov/ReferenceSamples/giab/data/AshkenazimTrio/HG002_NA24385_son/PacBio_MtSinai_NIST/PacBio_fasta/m141228_025602_42156.subreads.fasta.gz	PacBio CLR	HG002	Benchmark HG002 on long reads
HG002	ftp://ftp-trace.ncbi.nlm.nih.gov/ReferenceSamples/giab/data/AshkenazimTrio/HG002_NA24385_son/PacBio_MtSinai_NIST/PacBio_fasta/m141228_092303_42156.subreads.fasta.gz	PacBio CLR	HG002	Benchmark HG002 on long reads
HG002	ftp://ftp-trace.ncbi.nlm.nih.gov/ReferenceSamples/giab/data/AshkenazimTrio/HG002_NA24385_son/PacBio_MtSinai_NIST/PacBio_fasta/m141228_154532_42156.subreads.fasta.gz	PacBio CLR	HG002	Benchmark HG002 on long reads
HG002	ftp://ftp-trace.ncbi.nlm.nih.gov/ReferenceSamples/giab/data/AshkenazimTrio/HG002_NA24385_son/PacBio_MtSinai_NIST/PacBio_fasta/m141229_001808_42156.subreads.fasta.gz	PacBio CLR	HG002	Benchmark HG002 on long reads
HG002	ftp://ftp-trace.ncbi.nlm.nih.gov/ReferenceSamples/giab/data/AshkenazimTrio/HG002_NA24385_son/PacBio_MtSinai_NIST/PacBio_fasta/m141229_064248_42156.subreads.fasta.gz	PacBio CLR	HG002	Benchmark HG002 on long reads
HG002	ftp://ftp-trace.ncbi.nlm.nih.gov/ReferenceSamples/giab/data/AshkenazimTrio/HG002_NA24385_son/PacBio_MtSinai_NIST/PacBio_fasta/m141229_130433_42156.subreads.fasta.gz	PacBio CLR	HG002	Benchmark HG002 on long reads
HG002	ftp://ftp-trace.ncbi.nlm.nih.gov/ReferenceSamples/giab/data/AshkenazimTrio/HG002_NA24385_son/PacBio_MtSinai_NIST/PacBio_fasta/m141229_192903_42156.subreads.fasta.gz	PacBio CLR	HG002	Benchmark HG002 on long reads
HG002	ftp://ftp-trace.ncbi.nlm.nih.gov/ReferenceSamples/giab/data/AshkenazimTrio/HG002_NA24385_son/PacBio_MtSinai_NIST/PacBio_fasta/m141230_185412_42163.subreads.fasta.gz	PacBio CLR	HG002	Benchmark HG002 on long reads
HG002	ftp://ftp-trace.ncbi.nlm.nih.gov/ReferenceSamples/giab/data/AshkenazimTrio/HG002_NA24385_son/PacBio_MtSinai_NIST/PacBio_fasta/m141231_011325_42163.subreads.fasta.gz	PacBio CLR	HG002	Benchmark HG002 on long reads
HG002	ftp://ftp-trace.ncbi.nlm.nih.gov/ReferenceSamples/giab/data/AshkenazimTrio/HG002_NA24385_son/PacBio_MtSinai_NIST/PacBio_fasta/m141231_073633_42163.subreads.fasta.gz	PacBio CLR	HG002	Benchmark HG002 on long reads
HG002	ftp://ftp-trace.ncbi.nlm.nih.gov/ReferenceSamples/giab/data/AshkenazimTrio/HG002_NA24385_son/PacBio_MtSinai_NIST/PacBio_fasta/m141231_135355_42163.subreads.fasta.gz	PacBio CLR	HG002	Benchmark HG002 on long reads
HG002	ftp://ftp-trace.ncbi.nlm.nih.gov/ReferenceSamples/giab/data/AshkenazimTrio/HG002_NA24385_son/PacBio_MtSinai_NIST/PacBio_fasta/m150104_052356_42177.subreads.fasta.gz	PacBio CLR	HG002	Benchmark HG002 on long reads
HG002	ftp://ftp-trace.ncbi.nlm.nih.gov/ReferenceSamples/giab/data/AshkenazimTrio/HG002_NA24385_son/PacBio_MtSinai_NIST/PacBio_fasta/m150104_114301_42177.subreads.fasta.gz	PacBio CLR	HG002	Benchmark HG002 on long reads
HG002	ftp://ftp-trace.ncbi.nlm.nih.gov/ReferenceSamples/giab/data/AshkenazimTrio/HG002_NA24385_son/PacBio_MtSinai_NIST/PacBio_fasta/m150104_180420_42177.subreads.fasta.gz	PacBio CLR	HG002	Benchmark HG002 on long reads
HG002	ftp://ftp-trace.ncbi.nlm.nih.gov/ReferenceSamples/giab/data/AshkenazimTrio/HG002_NA24385_son/PacBio_MtSinai_NIST/PacBio_fasta/m150105_002357_42177.subreads.fasta.gz	PacBio CLR	HG002	Benchmark HG002 on long reads
HG002	ftp://ftp-trace.ncbi.nlm.nih.gov/ReferenceSamples/giab/data/AshkenazimTrio/HG002_NA24385_son/PacBio_MtSinai_NIST/PacBio_fasta/m150105_064027_42177.subreads.fasta.gz	PacBio CLR	HG002	Benchmark HG002 on long reads
HG002	ftp://ftp-trace.ncbi.nlm.nih.gov/ReferenceSamples/giab/data/AshkenazimTrio/HG002_NA24385_son/PacBio_MtSinai_NIST/PacBio_fasta/m150105_125953_42177.subreads.fasta.gz	PacBio CLR	HG002	Benchmark HG002 on long reads
HG002	ftp://ftp-trace.ncbi.nlm.nih.gov/ReferenceSamples/giab/data/AshkenazimTrio/HG002_NA24385_son/PacBio_MtSinai_NIST/PacBio_fasta/m150105_192231_42177.subreads.fasta.gz	PacBio CLR	HG002	Benchmark HG002 on long reads
HG002	ftp://ftp-trace.ncbi.nlm.nih.gov/ReferenceSamples/giab/data/AshkenazimTrio/HG002_NA24385_son/PacBio_MtSinai_NIST/PacBio_fasta/m150106_014109_42177.subreads.fasta.gz	PacBio CLR	HG002	Benchmark HG002 on long reads
HG002	ftp://ftp-trace.ncbi.nlm.nih.gov/ReferenceSamples/giab/data/AshkenazimTrio/HG002_NA24385_son/PacBio_MtSinai_NIST/PacBio_fasta/m150106_030341_42163.subreads.fasta.gz	PacBio CLR	HG002	Benchmark HG002 on long reads
HG002	ftp://ftp-trace.ncbi.nlm.nih.gov/ReferenceSamples/giab/data/AshkenazimTrio/HG002_NA24385_son/PacBio_MtSinai_NIST/PacBio_fasta/m150106_092507_42163.subreads.fasta.gz	PacBio CLR	HG002	Benchmark HG002 on long reads
HG002	ftp://ftp-trace.ncbi.nlm.nih.gov/ReferenceSamples/giab/data/AshkenazimTrio/HG002_NA24385_son/PacBio_MtSinai_NIST/PacBio_fasta/m150106_154558_42163.subreads.fasta.gz	PacBio CLR	HG002	Benchmark HG002 on long reads
HG002	ftp://ftp-trace.ncbi.nlm.nih.gov/ReferenceSamples/giab/data/AshkenazimTrio/HG002_NA24385_son/PacBio_MtSinai_NIST/PacBio_fasta/m150107_042351_42163.subreads.fasta.gz	PacBio CLR	HG002	Benchmark HG002 on long reads
HG002	ftp://ftp-trace.ncbi.nlm.nih.gov/ReferenceSamples/giab/data/AshkenazimTrio/HG002_NA24385_son/PacBio_MtSinai_NIST/PacBio_fasta/m150107_103943_42163.subreads.fasta.gz	PacBio CLR	HG002	Benchmark HG002 on long reads
HG002	ftp://ftp-trace.ncbi.nlm.nih.gov/ReferenceSamples/giab/data/AshkenazimTrio/HG002_NA24385_son/PacBio_MtSinai_NIST/PacBio_fasta/m150107_232026_42163.subreads.fasta.gz	PacBio CLR	HG002	Benchmark HG002 on long reads
HG002	ftp://ftp-trace.ncbi.nlm.nih.gov/ReferenceSamples/giab/data/AshkenazimTrio/HG002_NA24385_son/PacBio_MtSinai_NIST/PacBio_fasta/m150109_220407_42163.subreads.fasta.gz	PacBio CLR	HG002	Benchmark HG002 on long reads
HG002	ftp://ftp-trace.ncbi.nlm.nih.gov/ReferenceSamples/giab/data/AshkenazimTrio/HG002_NA24385_son/PacBio_MtSinai_NIST/PacBio_fasta/m150110_042518_42163.subreads.fasta.gz	PacBio CLR	HG002	Benchmark HG002 on long reads
HG002	ftp://ftp-trace.ncbi.nlm.nih.gov/ReferenceSamples/giab/data/AshkenazimTrio/HG002_NA24385_son/PacBio_MtSinai_NIST/PacBio_fasta/m150110_104156_42163.subreads.fasta.gz	PacBio CLR	HG002	Benchmark HG002 on long reads
HG002	ftp://ftp-trace.ncbi.nlm.nih.gov/ReferenceSamples/giab/data/AshkenazimTrio/HG002_NA24385_son/PacBio_MtSinai_NIST/PacBio_fasta/m150110_170014_42163.subreads.fasta.gz	PacBio CLR	HG002	Benchmark HG002 on long reads
HG002	ftp://ftp-trace.ncbi.nlm.nih.gov/ReferenceSamples/giab/data/AshkenazimTrio/HG002_NA24385_son/PacBio_MtSinai_NIST/PacBio_fasta/m150110_232147_42163.subreads.fasta.gz	PacBio CLR	HG002	Benchmark HG002 on long reads
HG002	ftp://ftp-trace.ncbi.nlm.nih.gov/ReferenceSamples/giab/data/AshkenazimTrio/HG002_NA24385_son/PacBio_MtSinai_NIST/PacBio_fasta/m150111_053828_42163.subreads.fasta.gz	PacBio CLR	HG002	Benchmark HG002 on long reads
HG002	ftp://ftp-trace.ncbi.nlm.nih.gov/ReferenceSamples/giab/data/AshkenazimTrio/HG002_NA24385_son/PacBio_MtSinai_NIST/PacBio_fasta/m150111_120318_42163.subreads.fasta.gz	PacBio CLR	HG002	Benchmark HG002 on long reads
HG002	ftp://ftp-trace.ncbi.nlm.nih.gov/ReferenceSamples/giab/data/AshkenazimTrio/HG002_NA24385_son/PacBio_MtSinai_NIST/PacBio_fasta/m150111_182307_42163.subreads.fasta.gz	PacBio CLR	HG002	Benchmark HG002 on long reads
HG002	ftp://ftp-trace.ncbi.nlm.nih.gov/ReferenceSamples/giab/data/AshkenazimTrio/HG002_NA24385_son/PacBio_MtSinai_NIST/PacBio_fasta/m150115_071022_42156.subreads.fasta.gz	PacBio CLR	HG002	Benchmark HG002 on long reads
HG002	ftp://ftp-trace.ncbi.nlm.nih.gov/ReferenceSamples/giab/data/AshkenazimTrio/HG002_NA24385_son/PacBio_MtSinai_NIST/PacBio_fasta/m150115_132713_42156.subreads.fasta.gz	PacBio CLR	HG002	Benchmark HG002 on long reads
HG002	ftp://ftp-trace.ncbi.nlm.nih.gov/ReferenceSamples/giab/data/AshkenazimTrio/HG002_NA24385_son/PacBio_MtSinai_NIST/PacBio_fasta/m150115_194636_42156.subreads.fasta.gz	PacBio CLR	HG002	Benchmark HG002 on long reads
HG002	ftp://ftp-trace.ncbi.nlm.nih.gov/ReferenceSamples/giab/data/AshkenazimTrio/HG002_NA24385_son/PacBio_MtSinai_NIST/PacBio_fasta/m150116_020812_42156.subreads.fasta.gz	PacBio CLR	HG002	Benchmark HG002 on long reads
HG002	ftp://ftp-trace.ncbi.nlm.nih.gov/ReferenceSamples/giab/data/AshkenazimTrio/HG002_NA24385_son/PacBio_MtSinai_NIST/PacBio_fasta/m150116_082508_42156.subreads.fasta.gz	PacBio CLR	HG002	Benchmark HG002 on long reads
HG002	ftp://ftp-trace.ncbi.nlm.nih.gov/ReferenceSamples/giab/data/AshkenazimTrio/HG002_NA24385_son/PacBio_MtSinai_NIST/PacBio_fasta/m150116_144703_42156.subreads.fasta.gz	PacBio CLR	HG002	Benchmark HG002 on long reads
HG002	ftp://ftp-trace.ncbi.nlm.nih.gov/ReferenceSamples/giab/data/AshkenazimTrio/HG002_NA24385_son/PacBio_MtSinai_NIST/PacBio_fasta/m150121_002905_42163.subreads.fasta.gz	PacBio CLR	HG002	Benchmark HG002 on long reads
HG002	ftp://ftp-trace.ncbi.nlm.nih.gov/ReferenceSamples/giab/data/AshkenazimTrio/HG002_NA24385_son/PacBio_MtSinai_NIST/PacBio_fasta/m150121_004822_42156.subreads.fasta.gz	PacBio CLR	HG002	Benchmark HG002 on long reads
HG002	ftp://ftp-trace.ncbi.nlm.nih.gov/ReferenceSamples/giab/data/AshkenazimTrio/HG002_NA24385_son/PacBio_MtSinai_NIST/PacBio_fasta/m150121_064521_42163.subreads.fasta.gz	PacBio CLR	HG002	Benchmark HG002 on long reads
HG002	ftp://ftp-trace.ncbi.nlm.nih.gov/ReferenceSamples/giab/data/AshkenazimTrio/HG002_NA24385_son/PacBio_MtSinai_NIST/PacBio_fasta/m150121_070331_42156.subreads.fasta.gz	PacBio CLR	HG002	Benchmark HG002 on long reads
HG002	ftp://ftp-trace.ncbi.nlm.nih.gov/ReferenceSamples/giab/data/AshkenazimTrio/HG002_NA24385_son/PacBio_MtSinai_NIST/PacBio_fasta/m150121_130130_42163.subreads.fasta.gz	PacBio CLR	HG002	Benchmark HG002 on long reads
HG002	ftp://ftp-trace.ncbi.nlm.nih.gov/ReferenceSamples/giab/data/AshkenazimTrio/HG002_NA24385_son/PacBio_MtSinai_NIST/PacBio_fasta/m150121_131941_42156.subreads.fasta.gz	PacBio CLR	HG002	Benchmark HG002 on long reads
HG002	ftp://ftp-trace.ncbi.nlm.nih.gov/ReferenceSamples/giab/data/AshkenazimTrio/HG002_NA24385_son/PacBio_MtSinai_NIST/PacBio_fasta/m150121_191806_42163.subreads.fasta.gz	PacBio CLR	HG002	Benchmark HG002 on long reads
HG002	ftp://ftp-trace.ncbi.nlm.nih.gov/ReferenceSamples/giab/data/AshkenazimTrio/HG002_NA24385_son/PacBio_MtSinai_NIST/PacBio_fasta/m150121_193615_42156.subreads.fasta.gz	PacBio CLR	HG002	Benchmark HG002 on long reads
HG002	ftp://ftp-trace.ncbi.nlm.nih.gov/ReferenceSamples/giab/data/AshkenazimTrio/HG002_NA24385_son/PacBio_MtSinai_NIST/PacBio_fasta/m150122_013411_42163.subreads.fasta.gz	PacBio CLR	HG002	Benchmark HG002 on long reads
HG002	ftp://ftp-trace.ncbi.nlm.nih.gov/ReferenceSamples/giab/data/AshkenazimTrio/HG002_NA24385_son/PacBio_MtSinai_NIST/PacBio_fasta/m150122_015221_42156.subreads.fasta.gz	PacBio CLR	HG002	Benchmark HG002 on long reads
HG002	ftp://ftp-trace.ncbi.nlm.nih.gov/ReferenceSamples/giab/data/AshkenazimTrio/HG002_NA24385_son/PacBio_MtSinai_NIST/PacBio_fasta/m150122_075028_42163.subreads.fasta.gz	PacBio CLR	HG002	Benchmark HG002 on long reads
HG002	ftp://ftp-trace.ncbi.nlm.nih.gov/ReferenceSamples/giab/data/AshkenazimTrio/HG002_NA24385_son/PacBio_MtSinai_NIST/PacBio_fasta/m150122_080841_42156.subreads.fasta.gz	PacBio CLR	HG002	Benchmark HG002 on long reads
HG002	ftp://ftp-trace.ncbi.nlm.nih.gov/ReferenceSamples/giab/data/AshkenazimTrio/HG002_NA24385_son/PacBio_MtSinai_NIST/PacBio_fasta/m150123_002317_42163.subreads.fasta.gz	PacBio CLR	HG002	Benchmark HG002 on long reads
HG002	ftp://ftp-trace.ncbi.nlm.nih.gov/ReferenceSamples/giab/data/AshkenazimTrio/HG002_NA24385_son/PacBio_MtSinai_NIST/PacBio_fasta/m150123_063937_42163.subreads.fasta.gz	PacBio CLR	HG002	Benchmark HG002 on long reads
HG002	ftp://ftp-trace.ncbi.nlm.nih.gov/ReferenceSamples/giab/data/AshkenazimTrio/HG002_NA24385_son/PacBio_MtSinai_NIST/PacBio_fasta/m150123_125557_42163.subreads.fasta.gz	PacBio CLR	HG002	Benchmark HG002 on long reads
HG002	ftp://ftp-trace.ncbi.nlm.nih.gov/ReferenceSamples/giab/data/AshkenazimTrio/HG002_NA24385_son/PacBio_MtSinai_NIST/PacBio_fasta/m150123_185255_42177.subreads.fasta.gz	PacBio CLR	HG002	Benchmark HG002 on long reads
HG002	ftp://ftp-trace.ncbi.nlm.nih.gov/ReferenceSamples/giab/data/AshkenazimTrio/HG002_NA24385_son/PacBio_MtSinai_NIST/PacBio_fasta/m150123_191227_42163.subreads.fasta.gz	PacBio CLR	HG002	Benchmark HG002 on long reads
HG002	ftp://ftp-trace.ncbi.nlm.nih.gov/ReferenceSamples/giab/data/AshkenazimTrio/HG002_NA24385_son/PacBio_MtSinai_NIST/PacBio_fasta/m150124_010846_42177.subreads.fasta.gz	PacBio CLR	HG002	Benchmark HG002 on long reads
HG002	ftp://ftp-trace.ncbi.nlm.nih.gov/ReferenceSamples/giab/data/AshkenazimTrio/HG002_NA24385_son/PacBio_MtSinai_NIST/PacBio_fasta/m150124_012843_42163.subreads.fasta.gz	PacBio CLR	HG002	Benchmark HG002 on long reads
HG002	ftp://ftp-trace.ncbi.nlm.nih.gov/ReferenceSamples/giab/data/AshkenazimTrio/HG002_NA24385_son/PacBio_MtSinai_NIST/PacBio_fasta/m150124_072937_42177.subreads.fasta.gz	PacBio CLR	HG002	Benchmark HG002 on long reads
HG002	ftp://ftp-trace.ncbi.nlm.nih.gov/ReferenceSamples/giab/data/AshkenazimTrio/HG002_NA24385_son/PacBio_MtSinai_NIST/PacBio_fasta/m150124_074513_42163.subreads.fasta.gz	PacBio CLR	HG002	Benchmark HG002 on long reads
HG002	ftp://ftp-trace.ncbi.nlm.nih.gov/ReferenceSamples/giab/data/AshkenazimTrio/HG002_NA24385_son/PacBio_MtSinai_NIST/PacBio_fasta/m150124_135118_42177.subreads.fasta.gz	PacBio CLR	HG002	Benchmark HG002 on long reads
HG002	ftp://ftp-trace.ncbi.nlm.nih.gov/ReferenceSamples/giab/data/AshkenazimTrio/HG002_NA24385_son/PacBio_MtSinai_NIST/PacBio_fasta/m150124_140408_42163.subreads.fasta.gz	PacBio CLR	HG002	Benchmark HG002 on long reads
HG002	ftp://ftp-trace.ncbi.nlm.nih.gov/ReferenceSamples/giab/data/AshkenazimTrio/HG002_NA24385_son/PacBio_MtSinai_NIST/PacBio_fasta/m150124_194017_42156.subreads.fasta.gz	PacBio CLR	HG002	Benchmark HG002 on long reads
HG002	ftp://ftp-trace.ncbi.nlm.nih.gov/ReferenceSamples/giab/data/AshkenazimTrio/HG002_NA24385_son/PacBio_MtSinai_NIST/PacBio_fasta/m150124_201043_42177.subreads.fasta.gz	PacBio CLR	HG002	Benchmark HG002 on long reads
HG002	ftp://ftp-trace.ncbi.nlm.nih.gov/ReferenceSamples/giab/data/AshkenazimTrio/HG002_NA24385_son/PacBio_MtSinai_NIST/PacBio_fasta/m150124_201759_42163.subreads.fasta.gz	PacBio CLR	HG002	Benchmark HG002 on long reads
HG002	ftp://ftp-trace.ncbi.nlm.nih.gov/ReferenceSamples/giab/data/AshkenazimTrio/HG002_NA24385_son/PacBio_MtSinai_NIST/PacBio_fasta/m150125_015640_42156.subreads.fasta.gz	PacBio CLR	HG002	Benchmark HG002 on long reads
HG002	ftp://ftp-trace.ncbi.nlm.nih.gov/ReferenceSamples/giab/data/AshkenazimTrio/HG002_NA24385_son/PacBio_MtSinai_NIST/PacBio_fasta/m150125_023225_42177.subreads.fasta.gz	PacBio CLR	HG002	Benchmark HG002 on long reads
HG002	ftp://ftp-trace.ncbi.nlm.nih.gov/ReferenceSamples/giab/data/AshkenazimTrio/HG002_NA24385_son/PacBio_MtSinai_NIST/PacBio_fasta/m150125_045059_42163.subreads.fasta.gz	PacBio CLR	HG002	Benchmark HG002 on long reads
HG002	ftp://ftp-trace.ncbi.nlm.nih.gov/ReferenceSamples/giab/data/AshkenazimTrio/HG002_NA24385_son/PacBio_MtSinai_NIST/PacBio_fasta/m150125_082021_42156.subreads.fasta.gz	PacBio CLR	HG002	Benchmark HG002 on long reads
HG002	ftp://ftp-trace.ncbi.nlm.nih.gov/ReferenceSamples/giab/data/AshkenazimTrio/HG002_NA24385_son/PacBio_MtSinai_NIST/PacBio_fasta/m150125_085113_42177.subreads.fasta.gz	PacBio CLR	HG002	Benchmark HG002 on long reads
HG002	ftp://ftp-trace.ncbi.nlm.nih.gov/ReferenceSamples/giab/data/AshkenazimTrio/HG002_NA24385_son/PacBio_MtSinai_NIST/PacBio_fasta/m150125_110521_42163.subreads.fasta.gz	PacBio CLR	HG002	Benchmark HG002 on long reads
HG002	ftp://ftp-trace.ncbi.nlm.nih.gov/ReferenceSamples/giab/data/AshkenazimTrio/HG002_NA24385_son/PacBio_MtSinai_NIST/PacBio_fasta/m150125_144047_42156.subreads.fasta.gz	PacBio CLR	HG002	Benchmark HG002 on long reads
HG002	ftp://ftp-trace.ncbi.nlm.nih.gov/ReferenceSamples/giab/data/AshkenazimTrio/HG002_NA24385_son/PacBio_MtSinai_NIST/PacBio_fasta/m150125_172210_42163.subreads.fasta.gz	PacBio CLR	HG002	Benchmark HG002 on long reads
HG002	ftp://ftp-trace.ncbi.nlm.nih.gov/ReferenceSamples/giab/data/AshkenazimTrio/HG002_NA24385_son/PacBio_MtSinai_NIST/PacBio_fasta/m150125_205714_42156.subreads.fasta.gz	PacBio CLR	HG002	Benchmark HG002 on long reads
HG002	ftp://ftp-trace.ncbi.nlm.nih.gov/ReferenceSamples/giab/data/AshkenazimTrio/HG002_NA24385_son/PacBio_MtSinai_NIST/PacBio_fasta/m150125_233800_42163.subreads.fasta.gz	PacBio CLR	HG002	Benchmark HG002 on long reads
HG002	ftp://ftp-trace.ncbi.nlm.nih.gov/ReferenceSamples/giab/data/AshkenazimTrio/HG002_NA24385_son/PacBio_MtSinai_NIST/PacBio_fasta/m150126_031811_42156.subreads.fasta.gz	PacBio CLR	HG002	Benchmark HG002 on long reads
HG002	ftp://ftp-trace.ncbi.nlm.nih.gov/ReferenceSamples/giab/data/AshkenazimTrio/HG002_NA24385_son/PacBio_MtSinai_NIST/PacBio_fasta/m150126_055426_42163.subreads.fasta.gz	PacBio CLR	HG002	Benchmark HG002 on long reads
HG002	ftp://ftp-trace.ncbi.nlm.nih.gov/ReferenceSamples/giab/data/AshkenazimTrio/HG002_NA24385_son/PacBio_MtSinai_NIST/PacBio_fasta/m150126_093705_42156.subreads.fasta.gz	PacBio CLR	HG002	Benchmark HG002 on long reads
HG002	ftp://ftp-trace.ncbi.nlm.nih.gov/ReferenceSamples/giab/data/AshkenazimTrio/HG002_NA24385_son/PacBio_MtSinai_NIST/PacBio_fasta/m150126_121037_42163.subreads.fasta.gz	PacBio CLR	HG002	Benchmark HG002 on long reads
HG002	ftp://ftp-trace.ncbi.nlm.nih.gov/ReferenceSamples/giab/data/AshkenazimTrio/HG002_NA24385_son/PacBio_MtSinai_NIST/PacBio_fasta/m150126_183011_42163.subreads.fasta.gz	PacBio CLR	HG002	Benchmark HG002 on long reads
HG002	ftp://ftp-trace.ncbi.nlm.nih.gov/ReferenceSamples/giab/data/AshkenazimTrio/HG002_NA24385_son/PacBio_MtSinai_NIST/PacBio_fasta/m150127_004314_42163.subreads.fasta.gz	PacBio CLR	HG002	Benchmark HG002 on long reads
HG002	ftp://ftp-trace.ncbi.nlm.nih.gov/ReferenceSamples/giab/data/AshkenazimTrio/HG002_NA24385_son/PacBio_MtSinai_NIST/PacBio_fasta/m150129_030257_42163.subreads.fasta.gz	PacBio CLR	HG002	Benchmark HG002 on long reads
HG002	ftp://ftp-trace.ncbi.nlm.nih.gov/ReferenceSamples/giab/data/AshkenazimTrio/HG002_NA24385_son/PacBio_MtSinai_NIST/PacBio_fasta/m150129_031217_42177.subreads.fasta.gz	PacBio CLR	HG002	Benchmark HG002 on long reads
HG002	ftp://ftp-trace.ncbi.nlm.nih.gov/ReferenceSamples/giab/data/AshkenazimTrio/HG002_NA24385_son/PacBio_MtSinai_NIST/PacBio_fasta/m150129_092208_42163.subreads.fasta.gz	PacBio CLR	HG002	Benchmark HG002 on long reads
HG002	ftp://ftp-trace.ncbi.nlm.nih.gov/ReferenceSamples/giab/data/AshkenazimTrio/HG002_NA24385_son/PacBio_MtSinai_NIST/PacBio_fasta/m150129_092719_42177.subreads.fasta.gz	PacBio CLR	HG002	Benchmark HG002 on long reads
HG002	ftp://ftp-trace.ncbi.nlm.nih.gov/ReferenceSamples/giab/data/AshkenazimTrio/HG002_NA24385_son/PacBio_MtSinai_NIST/PacBio_fasta/m150129_154132_42177.subreads.fasta.gz	PacBio CLR	HG002	Benchmark HG002 on long reads
HG002	ftp://ftp-trace.ncbi.nlm.nih.gov/ReferenceSamples/giab/data/AshkenazimTrio/HG002_NA24385_son/PacBio_MtSinai_NIST/PacBio_fasta/m150129_154506_42163.subreads.fasta.gz	PacBio CLR	HG002	Benchmark HG002 on long reads
HG002	ftp://ftp-trace.ncbi.nlm.nih.gov/ReferenceSamples/giab/data/AshkenazimTrio/HG002_NA24385_son/PacBio_MtSinai_NIST/PacBio_fasta/m150129_215808_42177.subreads.fasta.gz	PacBio CLR	HG002	Benchmark HG002 on long reads
HG002	ftp://ftp-trace.ncbi.nlm.nih.gov/ReferenceSamples/giab/data/AshkenazimTrio/HG002_NA24385_son/PacBio_MtSinai_NIST/PacBio_fasta/m150129_220045_42163.subreads.fasta.gz	PacBio CLR	HG002	Benchmark HG002 on long reads
HG002	ftp://ftp-trace.ncbi.nlm.nih.gov/ReferenceSamples/giab/data/AshkenazimTrio/HG002_NA24385_son/PacBio_MtSinai_NIST/PacBio_fasta/m150130_022735_42156.subreads.fasta.gz	PacBio CLR	HG002	Benchmark HG002 on long reads
HG002	ftp://ftp-trace.ncbi.nlm.nih.gov/ReferenceSamples/giab/data/AshkenazimTrio/HG002_NA24385_son/PacBio_MtSinai_NIST/PacBio_fasta/m150130_041419_42177.subreads.fasta.gz	PacBio CLR	HG002	Benchmark HG002 on long reads
HG002	ftp://ftp-trace.ncbi.nlm.nih.gov/ReferenceSamples/giab/data/AshkenazimTrio/HG002_NA24385_son/PacBio_MtSinai_NIST/PacBio_fasta/m150130_084316_42156.subreads.fasta.gz	PacBio CLR	HG002	Benchmark HG002 on long reads
HG002	ftp://ftp-trace.ncbi.nlm.nih.gov/ReferenceSamples/giab/data/AshkenazimTrio/HG002_NA24385_son/PacBio_MtSinai_NIST/PacBio_fasta/m150130_103025_42177.subreads.fasta.gz	PacBio CLR	HG002	Benchmark HG002 on long reads
HG002	ftp://ftp-trace.ncbi.nlm.nih.gov/ReferenceSamples/giab/data/AshkenazimTrio/HG002_NA24385_son/PacBio_MtSinai_NIST/PacBio_fasta/m150130_145930_42156.subreads.fasta.gz	PacBio CLR	HG002	Benchmark HG002 on long reads
HG002	ftp://ftp-trace.ncbi.nlm.nih.gov/ReferenceSamples/giab/data/AshkenazimTrio/HG002_NA24385_son/PacBio_MtSinai_NIST/PacBio_fasta/m150130_165055_42177.subreads.fasta.gz	PacBio CLR	HG002	Benchmark HG002 on long reads
HG002	ftp://ftp-trace.ncbi.nlm.nih.gov/ReferenceSamples/giab/data/AshkenazimTrio/HG002_NA24385_son/PacBio_MtSinai_NIST/PacBio_fasta/m150130_211544_42156.subreads.fasta.gz	PacBio CLR	HG002	Benchmark HG002 on long reads
HG002	ftp://ftp-trace.ncbi.nlm.nih.gov/ReferenceSamples/giab/data/AshkenazimTrio/HG002_NA24385_son/PacBio_MtSinai_NIST/PacBio_fasta/m150131_015113_42163.subreads.fasta.gz	PacBio CLR	HG002	Benchmark HG002 on long reads
HG002	ftp://ftp-trace.ncbi.nlm.nih.gov/ReferenceSamples/giab/data/AshkenazimTrio/HG002_NA24385_son/PacBio_MtSinai_NIST/PacBio_fasta/m150131_033204_42156.subreads.fasta.gz	PacBio CLR	HG002	Benchmark HG002 on long reads
HG002	ftp://ftp-trace.ncbi.nlm.nih.gov/ReferenceSamples/giab/data/AshkenazimTrio/HG002_NA24385_son/PacBio_MtSinai_NIST/PacBio_fasta/m150131_080744_42163.subreads.fasta.gz	PacBio CLR	HG002	Benchmark HG002 on long reads
HG002	ftp://ftp-trace.ncbi.nlm.nih.gov/ReferenceSamples/giab/data/AshkenazimTrio/HG002_NA24385_son/PacBio_MtSinai_NIST/PacBio_fasta/m150131_095117_42156.subreads.fasta.gz	PacBio CLR	HG002	Benchmark HG002 on long reads
HG002	ftp://ftp-trace.ncbi.nlm.nih.gov/ReferenceSamples/giab/data/AshkenazimTrio/HG002_NA24385_son/PacBio_MtSinai_NIST/PacBio_fasta/m150131_142353_42163.subreads.fasta.gz	PacBio CLR	HG002	Benchmark HG002 on long reads
HG002	ftp://ftp-trace.ncbi.nlm.nih.gov/ReferenceSamples/giab/data/AshkenazimTrio/HG002_NA24385_son/PacBio_MtSinai_NIST/PacBio_fasta/m150131_161359_42156.subreads.fasta.gz	PacBio CLR	HG002	Benchmark HG002 on long reads
HG002	ftp://ftp-trace.ncbi.nlm.nih.gov/ReferenceSamples/giab/data/AshkenazimTrio/HG002_NA24385_son/PacBio_MtSinai_NIST/PacBio_fasta/m150131_204023_42163.subreads.fasta.gz	PacBio CLR	HG002	Benchmark HG002 on long reads
HG002	ftp://ftp-trace.ncbi.nlm.nih.gov/ReferenceSamples/giab/data/AshkenazimTrio/HG002_NA24385_son/PacBio_MtSinai_NIST/PacBio_fasta/m150131_222943_42156.subreads.fasta.gz	PacBio CLR	HG002	Benchmark HG002 on long reads
HG002	ftp://ftp-trace.ncbi.nlm.nih.gov/ReferenceSamples/giab/data/AshkenazimTrio/HG002_NA24385_son/PacBio_MtSinai_NIST/PacBio_fasta/m150201_025636_42163.subreads.fasta.gz	PacBio CLR	HG002	Benchmark HG002 on long reads
HG002	ftp://ftp-trace.ncbi.nlm.nih.gov/ReferenceSamples/giab/data/AshkenazimTrio/HG002_NA24385_son/PacBio_MtSinai_NIST/PacBio_fasta/m150201_070534_42156.subreads.fasta.gz	PacBio CLR	HG002	Benchmark HG002 on long reads
HG002	ftp://ftp-trace.ncbi.nlm.nih.gov/ReferenceSamples/giab/data/AshkenazimTrio/HG002_NA24385_son/PacBio_MtSinai_NIST/PacBio_fasta/m150201_091546_42163.subreads.fasta.gz	PacBio CLR	HG002	Benchmark HG002 on long reads
HG002	ftp://ftp-trace.ncbi.nlm.nih.gov/ReferenceSamples/giab/data/AshkenazimTrio/HG002_NA24385_son/PacBio_MtSinai_NIST/PacBio_fasta/m150201_132016_42156.subreads.fasta.gz	PacBio CLR	HG002	Benchmark HG002 on long reads
HG002	ftp://ftp-trace.ncbi.nlm.nih.gov/ReferenceSamples/giab/data/AshkenazimTrio/HG002_NA24385_son/PacBio_MtSinai_NIST/PacBio_fasta/m150201_153803_42163.subreads.fasta.gz	PacBio CLR	HG002	Benchmark HG002 on long reads
HG002	ftp://ftp-trace.ncbi.nlm.nih.gov/ReferenceSamples/giab/data/AshkenazimTrio/HG002_NA24385_son/PacBio_MtSinai_NIST/PacBio_fasta/m150201_193636_42156.subreads.fasta.gz	PacBio CLR	HG002	Benchmark HG002 on long reads
HG002	ftp://ftp-trace.ncbi.nlm.nih.gov/ReferenceSamples/giab/data/AshkenazimTrio/HG002_NA24385_son/PacBio_MtSinai_NIST/PacBio_fasta/m150201_215412_42163.subreads.fasta.gz	PacBio CLR	HG002	Benchmark HG002 on long reads
HG002	ftp://ftp-trace.ncbi.nlm.nih.gov/ReferenceSamples/giab/data/AshkenazimTrio/HG002_NA24385_son/PacBio_MtSinai_NIST/PacBio_fasta/m150202_015256_42156.subreads.fasta.gz	PacBio CLR	HG002	Benchmark HG002 on long reads
HG002	ftp://ftp-trace.ncbi.nlm.nih.gov/ReferenceSamples/giab/data/AshkenazimTrio/HG002_NA24385_son/PacBio_MtSinai_NIST/PacBio_fasta/m150202_063008_42163.subreads.fasta.gz	PacBio CLR	HG002	Benchmark HG002 on long reads
HG002	ftp://ftp-trace.ncbi.nlm.nih.gov/ReferenceSamples/giab/data/AshkenazimTrio/HG002_NA24385_son/PacBio_MtSinai_NIST/PacBio_fasta/m150202_071750_42177.subreads.fasta.gz	PacBio CLR	HG002	Benchmark HG002 on long reads
HG002	ftp://ftp-trace.ncbi.nlm.nih.gov/ReferenceSamples/giab/data/AshkenazimTrio/HG002_NA24385_son/PacBio_MtSinai_NIST/PacBio_fasta/m150202_080928_42156.subreads.fasta.gz	PacBio CLR	HG002	Benchmark HG002 on long reads
HG002	ftp://ftp-trace.ncbi.nlm.nih.gov/ReferenceSamples/giab/data/AshkenazimTrio/HG002_NA24385_son/PacBio_MtSinai_NIST/PacBio_fasta/m150202_124445_42163.subreads.fasta.gz	PacBio CLR	HG002	Benchmark HG002 on long reads
HG002	ftp://ftp-trace.ncbi.nlm.nih.gov/ReferenceSamples/giab/data/AshkenazimTrio/HG002_NA24385_son/PacBio_MtSinai_NIST/PacBio_fasta/m150202_133241_42177.subreads.fasta.gz	PacBio CLR	HG002	Benchmark HG002 on long reads
HG002	ftp://ftp-trace.ncbi.nlm.nih.gov/ReferenceSamples/giab/data/AshkenazimTrio/HG002_NA24385_son/PacBio_MtSinai_NIST/PacBio_fasta/m150202_142836_42156.subreads.fasta.gz	PacBio CLR	HG002	Benchmark HG002 on long reads
HG002	ftp://ftp-trace.ncbi.nlm.nih.gov/ReferenceSamples/giab/data/AshkenazimTrio/HG002_NA24385_son/PacBio_MtSinai_NIST/PacBio_fasta/m150202_190108_42163.subreads.fasta.gz	PacBio CLR	HG002	Benchmark HG002 on long reads
HG002	ftp://ftp-trace.ncbi.nlm.nih.gov/ReferenceSamples/giab/data/AshkenazimTrio/HG002_NA24385_son/PacBio_MtSinai_NIST/PacBio_fasta/m150202_194911_42177.subreads.fasta.gz	PacBio CLR	HG002	Benchmark HG002 on long reads
HG002	ftp://ftp-trace.ncbi.nlm.nih.gov/ReferenceSamples/giab/data/AshkenazimTrio/HG002_NA24385_son/PacBio_MtSinai_NIST/PacBio_fasta/m150202_205059_42156.subreads.fasta.gz	PacBio CLR	HG002	Benchmark HG002 on long reads
HG002	ftp://ftp-trace.ncbi.nlm.nih.gov/ReferenceSamples/giab/data/AshkenazimTrio/HG002_NA24385_son/PacBio_MtSinai_NIST/PacBio_fasta/m150203_011715_42163.subreads.fasta.gz	PacBio CLR	HG002	Benchmark HG002 on long reads
HG002	ftp://ftp-trace.ncbi.nlm.nih.gov/ReferenceSamples/giab/data/AshkenazimTrio/HG002_NA24385_son/PacBio_MtSinai_NIST/PacBio_fasta/m150203_020544_42177.subreads.fasta.gz	PacBio CLR	HG002	Benchmark HG002 on long reads
HG002	ftp://ftp-trace.ncbi.nlm.nih.gov/ReferenceSamples/giab/data/AshkenazimTrio/HG002_NA24385_son/PacBio_MtSinai_NIST/PacBio_fasta/m150203_030655_42156.subreads.fasta.gz	PacBio CLR	HG002	Benchmark HG002 on long reads
HG002	ftp://ftp-trace.ncbi.nlm.nih.gov/ReferenceSamples/giab/data/AshkenazimTrio/HG002_NA24385_son/PacBio_MtSinai_NIST/PacBio_fasta/m150203_073346_42163.subreads.fasta.gz	PacBio CLR	HG002	Benchmark HG002 on long reads
HG002	ftp://ftp-trace.ncbi.nlm.nih.gov/ReferenceSamples/giab/data/AshkenazimTrio/HG002_NA24385_son/PacBio_MtSinai_NIST/PacBio_fasta/m150203_082154_42177.subreads.fasta.gz	PacBio CLR	HG002	Benchmark HG002 on long reads
HG002	ftp://ftp-trace.ncbi.nlm.nih.gov/ReferenceSamples/giab/data/AshkenazimTrio/HG002_NA24385_son/PacBio_MtSinai_NIST/PacBio_fasta/m150203_135249_42163.subreads.fasta.gz	PacBio CLR	HG002	Benchmark HG002 on long reads
HG002	ftp://ftp-trace.ncbi.nlm.nih.gov/ReferenceSamples/giab/data/AshkenazimTrio/HG002_NA24385_son/PacBio_MtSinai_NIST/PacBio_fasta/m150203_144059_42177.subreads.fasta.gz	PacBio CLR	HG002	Benchmark HG002 on long reads
HG002	ftp://ftp-trace.ncbi.nlm.nih.gov/ReferenceSamples/giab/data/AshkenazimTrio/HG002_NA24385_son/PacBio_MtSinai_NIST/PacBio_fasta/m150203_201518_42163.subreads.fasta.gz	PacBio CLR	HG002	Benchmark HG002 on long reads
HG002	ftp://ftp-trace.ncbi.nlm.nih.gov/ReferenceSamples/giab/data/AshkenazimTrio/HG002_NA24385_son/PacBio_MtSinai_NIST/PacBio_fasta/m150203_210324_42177.subreads.fasta.gz	PacBio CLR	HG002	Benchmark HG002 on long reads
HG002	ftp://ftp-trace.ncbi.nlm.nih.gov/ReferenceSamples/giab/data/AshkenazimTrio/HG002_NA24385_son/PacBio_MtSinai_NIST/PacBio_fasta/m150204_023115_42163.subreads.fasta.gz	PacBio CLR	HG002	Benchmark HG002 on long reads
HG002	ftp://ftp-trace.ncbi.nlm.nih.gov/ReferenceSamples/giab/data/AshkenazimTrio/HG002_NA24385_son/PacBio_MtSinai_NIST/PacBio_fasta/m150204_031927_42177.subreads.fasta.gz	PacBio CLR	HG002	Benchmark HG002 on long reads
HG002	ftp://ftp-trace.ncbi.nlm.nih.gov/ReferenceSamples/giab/data/AshkenazimTrio/HG002_NA24385_son/PacBio_MtSinai_NIST/PacBio_fasta/m150204_103948_42156.subreads.fasta.gz	PacBio CLR	HG002	Benchmark HG002 on long reads
HG002	ftp://ftp-trace.ncbi.nlm.nih.gov/ReferenceSamples/giab/data/AshkenazimTrio/HG002_NA24385_son/PacBio_MtSinai_NIST/PacBio_fasta/m150204_165901_42156.subreads.fasta.gz	PacBio CLR	HG002	Benchmark HG002 on long reads
HG002	ftp://ftp-trace.ncbi.nlm.nih.gov/ReferenceSamples/giab/data/AshkenazimTrio/HG002_NA24385_son/PacBio_MtSinai_NIST/PacBio_fasta/m150204_231815_42156.subreads.fasta.gz	PacBio CLR	HG002	Benchmark HG002 on long reads
HG002	ftp://ftp-trace.ncbi.nlm.nih.gov/ReferenceSamples/giab/data/AshkenazimTrio/HG002_NA24385_son/PacBio_MtSinai_NIST/PacBio_fasta/m150205_053738_42156.subreads.fasta.gz	PacBio CLR	HG002	Benchmark HG002 on long reads
HG002	ftp://ftp-trace.ncbi.nlm.nih.gov/ReferenceSamples/giab/data/AshkenazimTrio/HG002_NA24385_son/PacBio_MtSinai_NIST/PacBio_fasta/m150205_120032_42156.subreads.fasta.gz	PacBio CLR	HG002	Benchmark HG002 on long reads
HG002	ftp://ftp-trace.ncbi.nlm.nih.gov/ReferenceSamples/giab/data/AshkenazimTrio/HG002_NA24385_son/PacBio_MtSinai_NIST/PacBio_fasta/m150205_181553_42156.subreads.fasta.gz	PacBio CLR	HG002	Benchmark HG002 on long reads
HG002	ftp://ftp-trace.ncbi.nlm.nih.gov/ReferenceSamples/giab/data/AshkenazimTrio/HG002_NA24385_son/PacBio_MtSinai_NIST/PacBio_fasta/m150206_002524_42163.subreads.fasta.gz	PacBio CLR	HG002	Benchmark HG002 on long reads
HG002	ftp://ftp-trace.ncbi.nlm.nih.gov/ReferenceSamples/giab/data/AshkenazimTrio/HG002_NA24385_son/PacBio_MtSinai_NIST/PacBio_fasta/m150206_064449_42163.subreads.fasta.gz	PacBio CLR	HG002	Benchmark HG002 on long reads
HG002	ftp://ftp-trace.ncbi.nlm.nih.gov/ReferenceSamples/giab/data/AshkenazimTrio/HG002_NA24385_son/PacBio_MtSinai_NIST/PacBio_fasta/m150206_130655_42163.subreads.fasta.gz	PacBio CLR	HG002	Benchmark HG002 on long reads
HG002	ftp://ftp-trace.ncbi.nlm.nih.gov/ReferenceSamples/giab/data/AshkenazimTrio/HG002_NA24385_son/PacBio_MtSinai_NIST/PacBio_fasta/m150207_003049_42163.subreads.fasta.gz	PacBio CLR	HG002	Benchmark HG002 on long reads
HG002	ftp://ftp-trace.ncbi.nlm.nih.gov/ReferenceSamples/giab/data/AshkenazimTrio/HG002_NA24385_son/PacBio_MtSinai_NIST/PacBio_fasta/m150207_065017_42163.subreads.fasta.gz	PacBio CLR	HG002	Benchmark HG002 on long reads
HG002	ftp://ftp-trace.ncbi.nlm.nih.gov/ReferenceSamples/giab/data/AshkenazimTrio/HG002_NA24385_son/PacBio_MtSinai_NIST/PacBio_fasta/m150207_130915_42163.subreads.fasta.gz	PacBio CLR	HG002	Benchmark HG002 on long reads
HG002	ftp://ftp-trace.ncbi.nlm.nih.gov/ReferenceSamples/giab/data/AshkenazimTrio/HG002_NA24385_son/PacBio_MtSinai_NIST/PacBio_fasta/m150207_192829_42163.subreads.fasta.gz	PacBio CLR	HG002	Benchmark HG002 on long reads
HG002	ftp://ftp-trace.ncbi.nlm.nih.gov/ReferenceSamples/giab/data/AshkenazimTrio/HG002_NA24385_son/PacBio_MtSinai_NIST/PacBio_fasta/m150208_014741_42163.subreads.fasta.gz	PacBio CLR	HG002	Benchmark HG002 on long reads
HG002	ftp://ftp-trace.ncbi.nlm.nih.gov/ReferenceSamples/giab/data/AshkenazimTrio/HG002_NA24385_son/PacBio_MtSinai_NIST/PacBio_fasta/m150208_080654_42163.subreads.fasta.gz	PacBio CLR	HG002	Benchmark HG002 on long reads
HG002	ftp://ftp-trace.ncbi.nlm.nih.gov/ReferenceSamples/giab/data/AshkenazimTrio/HG002_NA24385_son/PacBio_MtSinai_NIST/PacBio_fasta/m150208_142859_42163.subreads.fasta.gz	PacBio CLR	HG002	Benchmark HG002 on long reads
HG002	ftp://ftp-trace.ncbi.nlm.nih.gov/ReferenceSamples/giab/data/AshkenazimTrio/HG002_NA24385_son/PacBio_MtSinai_NIST/PacBio_fasta/m150208_204533_42163.subreads.fasta.gz	PacBio CLR	HG002	Benchmark HG002 on long reads
HG002	ftp://ftp-trace.ncbi.nlm.nih.gov/ReferenceSamples/giab/data/AshkenazimTrio/HG002_NA24385_son/PacBio_MtSinai_NIST/PacBio_fasta/m150209_050949_42163.subreads.fasta.gz	PacBio CLR	HG002	Benchmark HG002 on long reads
HG002	ftp://ftp-trace.ncbi.nlm.nih.gov/ReferenceSamples/giab/data/AshkenazimTrio/HG002_NA24385_son/PacBio_MtSinai_NIST/PacBio_fasta/m150209_112726_42163.subreads.fasta.gz	PacBio CLR	HG002	Benchmark HG002 on long reads
HG002	ftp://ftp-trace.ncbi.nlm.nih.gov/ReferenceSamples/giab/data/AshkenazimTrio/HG002_NA24385_son/PacBio_MtSinai_NIST/PacBio_fasta/m150209_174639_42163.subreads.fasta.gz	PacBio CLR	HG002	Benchmark HG002 on long reads
HG002	ftp://ftp-trace.ncbi.nlm.nih.gov/ReferenceSamples/giab/data/AshkenazimTrio/HG002_NA24385_son/PacBio_MtSinai_NIST/PacBio_fasta/m150210_000552_42163.subreads.fasta.gz	PacBio CLR	HG002	Benchmark HG002 on long reads
HG002	ftp://ftp-trace.ncbi.nlm.nih.gov/ReferenceSamples/giab/data/AshkenazimTrio/HG002_NA24385_son/PacBio_MtSinai_NIST/PacBio_fasta/m150210_062505_42163.subreads.fasta.gz	PacBio CLR	HG002	Benchmark HG002 on long reads
HG002	ftp://ftp-trace.ncbi.nlm.nih.gov/ReferenceSamples/giab/data/AshkenazimTrio/HG002_NA24385_son/PacBio_MtSinai_NIST/PacBio_fasta/m150210_124418_42163.subreads.fasta.gz	PacBio CLR	HG002	Benchmark HG002 on long reads
HG002	ftp://ftp-trace.ncbi.nlm.nih.gov/ReferenceSamples/giab/data/AshkenazimTrio/HG002_NA24385_son/PacBio_MtSinai_NIST/PacBio_fasta/m150211_010455_42163.subreads.fasta.gz	PacBio CLR	HG002	Benchmark HG002 on long reads
HG002	ftp://ftp-trace.ncbi.nlm.nih.gov/ReferenceSamples/giab/data/AshkenazimTrio/HG002_NA24385_son/PacBio_MtSinai_NIST/PacBio_fasta/m150211_072408_42163.subreads.fasta.gz	PacBio CLR	HG002	Benchmark HG002 on long reads
HG002	ftp://ftp-trace.ncbi.nlm.nih.gov/ReferenceSamples/giab/data/AshkenazimTrio/HG002_NA24385_son/PacBio_MtSinai_NIST/PacBio_fasta/m150211_134321_42163.subreads.fasta.gz	PacBio CLR	HG002	Benchmark HG002 on long reads
HG002	ftp://ftp-trace.ncbi.nlm.nih.gov/ReferenceSamples/giab/data/AshkenazimTrio/HG002_NA24385_son/PacBio_MtSinai_NIST/PacBio_fasta/m150211_200234_42163.subreads.fasta.gz	PacBio CLR	HG002	Benchmark HG002 on long reads
HG002	ftp://ftp-trace.ncbi.nlm.nih.gov/ReferenceSamples/giab/data/AshkenazimTrio/HG002_NA24385_son/PacBio_MtSinai_NIST/PacBio_fasta/m150212_001104_42177.subreads.fasta.gz	PacBio CLR	HG002	Benchmark HG002 on long reads
HG002	ftp://ftp-trace.ncbi.nlm.nih.gov/ReferenceSamples/giab/data/AshkenazimTrio/HG002_NA24385_son/PacBio_MtSinai_NIST/PacBio_fasta/m150212_022147_42163.subreads.fasta.gz	PacBio CLR	HG002	Benchmark HG002 on long reads
HG002	ftp://ftp-trace.ncbi.nlm.nih.gov/ReferenceSamples/giab/data/AshkenazimTrio/HG002_NA24385_son/PacBio_MtSinai_NIST/PacBio_fasta/m150212_063017_42177.subreads.fasta.gz	PacBio CLR	HG002	Benchmark HG002 on long reads
HG002	ftp://ftp-trace.ncbi.nlm.nih.gov/ReferenceSamples/giab/data/AshkenazimTrio/HG002_NA24385_son/PacBio_MtSinai_NIST/PacBio_fasta/m150212_084112_42163.subreads.fasta.gz	PacBio CLR	HG002	Benchmark HG002 on long reads
HG002	ftp://ftp-trace.ncbi.nlm.nih.gov/ReferenceSamples/giab/data/AshkenazimTrio/HG002_NA24385_son/PacBio_MtSinai_NIST/PacBio_fasta/m150212_124930_42177.subreads.fasta.gz	PacBio CLR	HG002	Benchmark HG002 on long reads
HG002	ftp://ftp-trace.ncbi.nlm.nih.gov/ReferenceSamples/giab/data/AshkenazimTrio/HG002_NA24385_son/PacBio_MtSinai_NIST/PacBio_fasta/m150212_150358_42163.subreads.fasta.gz	PacBio CLR	HG002	Benchmark HG002 on long reads
HG002	ftp://ftp-trace.ncbi.nlm.nih.gov/ReferenceSamples/giab/data/AshkenazimTrio/HG002_NA24385_son/PacBio_MtSinai_NIST/PacBio_fasta/m150212_190843_42177.subreads.fasta.gz	PacBio CLR	HG002	Benchmark HG002 on long reads
HG002	ftp://ftp-trace.ncbi.nlm.nih.gov/ReferenceSamples/giab/data/AshkenazimTrio/HG002_NA24385_son/PacBio_MtSinai_NIST/PacBio_fasta/m150212_211940_42163.subreads.fasta.gz	PacBio CLR	HG002	Benchmark HG002 on long reads
HG002	ftp://ftp-trace.ncbi.nlm.nih.gov/ReferenceSamples/giab/data/AshkenazimTrio/HG002_NA24385_son/PacBio_MtSinai_NIST/PacBio_fasta/m150213_054428_42163.subreads.fasta.gz	PacBio CLR	HG002	Benchmark HG002 on long reads
HG002	ftp://ftp-trace.ncbi.nlm.nih.gov/ReferenceSamples/giab/data/AshkenazimTrio/HG002_NA24385_son/PacBio_MtSinai_NIST/PacBio_fasta/m150213_120132_42163.subreads.fasta.gz	PacBio CLR	HG002	Benchmark HG002 on long reads
HG002	ftp://ftp-trace.ncbi.nlm.nih.gov/ReferenceSamples/giab/data/AshkenazimTrio/HG002_NA24385_son/PacBio_MtSinai_NIST/PacBio_fasta/m150215_025731_42156.subreads.fasta.gz	PacBio CLR	HG002	Benchmark HG002 on long reads
HG002	ftp://ftp-trace.ncbi.nlm.nih.gov/ReferenceSamples/giab/data/AshkenazimTrio/HG002_NA24385_son/PacBio_MtSinai_NIST/PacBio_fasta/m150215_061036_42177.subreads.fasta.gz	PacBio CLR	HG002	Benchmark HG002 on long reads
HG002	ftp://ftp-trace.ncbi.nlm.nih.gov/ReferenceSamples/giab/data/AshkenazimTrio/HG002_NA24385_son/PacBio_MtSinai_NIST/PacBio_fasta/m150215_091401_42156.subreads.fasta.gz	PacBio CLR	HG002	Benchmark HG002 on long reads
HG002	ftp://ftp-trace.ncbi.nlm.nih.gov/ReferenceSamples/giab/data/AshkenazimTrio/HG002_NA24385_son/PacBio_MtSinai_NIST/PacBio_fasta/m150215_122941_42177.subreads.fasta.gz	PacBio CLR	HG002	Benchmark HG002 on long reads
HG002	ftp://ftp-trace.ncbi.nlm.nih.gov/ReferenceSamples/giab/data/AshkenazimTrio/HG002_NA24385_son/PacBio_MtSinai_NIST/PacBio_fasta/m150215_153747_42156.subreads.fasta.gz	PacBio CLR	HG002	Benchmark HG002 on long reads
HG002	ftp://ftp-trace.ncbi.nlm.nih.gov/ReferenceSamples/giab/data/AshkenazimTrio/HG002_NA24385_son/PacBio_MtSinai_NIST/PacBio_fasta/m150215_185239_42177.subreads.fasta.gz	PacBio CLR	HG002	Benchmark HG002 on long reads
HG002	ftp://ftp-trace.ncbi.nlm.nih.gov/ReferenceSamples/giab/data/AshkenazimTrio/HG002_NA24385_son/PacBio_MtSinai_NIST/PacBio_fasta/m150215_215335_42156.subreads.fasta.gz	PacBio CLR	HG002	Benchmark HG002 on long reads
HG002	ftp://ftp-trace.ncbi.nlm.nih.gov/ReferenceSamples/giab/data/AshkenazimTrio/HG002_NA24385_son/PacBio_MtSinai_NIST/PacBio_fasta/m150216_011055_42177.subreads.fasta.gz	PacBio CLR	HG002	Benchmark HG002 on long reads
HG002	ftp://ftp-trace.ncbi.nlm.nih.gov/ReferenceSamples/giab/data/AshkenazimTrio/HG002_NA24385_son/PacBio_MtSinai_NIST/PacBio_fasta/m150216_062108_42156.subreads.fasta.gz	PacBio CLR	HG002	Benchmark HG002 on long reads
HG002	ftp://ftp-trace.ncbi.nlm.nih.gov/ReferenceSamples/giab/data/AshkenazimTrio/HG002_NA24385_son/PacBio_MtSinai_NIST/PacBio_fasta/m150216_123755_42156.subreads.fasta.gz	PacBio CLR	HG002	Benchmark HG002 on long reads
HG002	ftp://ftp-trace.ncbi.nlm.nih.gov/ReferenceSamples/giab/data/AshkenazimTrio/HG002_NA24385_son/PacBio_MtSinai_NIST/PacBio_fasta/m150216_185716_42156.subreads.fasta.gz	PacBio CLR	HG002	Benchmark HG002 on long reads
HG002	ftp://ftp-trace.ncbi.nlm.nih.gov/ReferenceSamples/giab/data/AshkenazimTrio/HG002_NA24385_son/PacBio_MtSinai_NIST/PacBio_fasta/m150217_011615_42156.subreads.fasta.gz	PacBio CLR	HG002	Benchmark HG002 on long reads
HG002	ftp://ftp-trace.ncbi.nlm.nih.gov/ReferenceSamples/giab/data/AshkenazimTrio/HG002_NA24385_son/PacBio_MtSinai_NIST/PacBio_fasta/m150217_073528_42156.subreads.fasta.gz	PacBio CLR	HG002	Benchmark HG002 on long reads
HG002	ftp://ftp-trace.ncbi.nlm.nih.gov/ReferenceSamples/giab/data/AshkenazimTrio/HG002_NA24385_son/PacBio_MtSinai_NIST/PacBio_fasta/m150217_135441_42156.subreads.fasta.gz	PacBio CLR	HG002	Benchmark HG002 on long reads
HG002	ftp://ftp-trace.ncbi.nlm.nih.gov/ReferenceSamples/giab/data/AshkenazimTrio/HG002_NA24385_son/PacBio_MtSinai_NIST/PacBio_fasta/m150217_201729_42156.subreads.fasta.gz	PacBio CLR	HG002	Benchmark HG002 on long reads
HG002	ftp://ftp-trace.ncbi.nlm.nih.gov/ReferenceSamples/giab/data/AshkenazimTrio/HG002_NA24385_son/PacBio_MtSinai_NIST/PacBio_fasta/m150218_023507_42156.subreads.fasta.gz	PacBio CLR	HG002	Benchmark HG002 on long reads
HG002	ftp://ftp-trace.ncbi.nlm.nih.gov/ReferenceSamples/giab/data/AshkenazimTrio/HG002_NA24385_son/PacBio_MtSinai_NIST/PacBio_fasta/m150219_010608_42163.subreads.fasta.gz	PacBio CLR	HG002	Benchmark HG002 on long reads
HG002	ftp://ftp-trace.ncbi.nlm.nih.gov/ReferenceSamples/giab/data/AshkenazimTrio/HG002_NA24385_son/PacBio_MtSinai_NIST/PacBio_fasta/m150219_072459_42163.subreads.fasta.gz	PacBio CLR	HG002	Benchmark HG002 on long reads
HG002	ftp://ftp-trace.ncbi.nlm.nih.gov/ReferenceSamples/giab/data/AshkenazimTrio/HG002_NA24385_son/PacBio_MtSinai_NIST/PacBio_fasta/m150219_134412_42163.subreads.fasta.gz	PacBio CLR	HG002	Benchmark HG002 on long reads
HG002	ftp://ftp-trace.ncbi.nlm.nih.gov/ReferenceSamples/giab/data/AshkenazimTrio/HG002_NA24385_son/PacBio_MtSinai_NIST/PacBio_fasta/m150219_200325_42163.subreads.fasta.gz	PacBio CLR	HG002	Benchmark HG002 on long reads
HG002	ftp://ftp-trace.ncbi.nlm.nih.gov/ReferenceSamples/giab/data/AshkenazimTrio/HG002_NA24385_son/PacBio_MtSinai_NIST/PacBio_fasta/m150220_022242_42163.subreads.fasta.gz	PacBio CLR	HG002	Benchmark HG002 on long reads
HG002	ftp://ftp-trace.ncbi.nlm.nih.gov/ReferenceSamples/giab/data/AshkenazimTrio/HG002_NA24385_son/PacBio_MtSinai_NIST/PacBio_fasta/m150220_084151_42163.subreads.fasta.gz	PacBio CLR	HG002	Benchmark HG002 on long reads
HG002	ftp://ftp-trace.ncbi.nlm.nih.gov/ReferenceSamples/giab/data/AshkenazimTrio/HG002_NA24385_son/PacBio_MtSinai_NIST/PacBio_fasta/m150220_150351_42163.subreads.fasta.gz	PacBio CLR	HG002	Benchmark HG002 on long reads
HG002	ftp://ftp-trace.ncbi.nlm.nih.gov/ReferenceSamples/giab/data/AshkenazimTrio/HG002_NA24385_son/PacBio_MtSinai_NIST/PacBio_fasta/m150221_003109_42177.subreads.fasta.gz	PacBio CLR	HG002	Benchmark HG002 on long reads
HG002	ftp://ftp-trace.ncbi.nlm.nih.gov/ReferenceSamples/giab/data/AshkenazimTrio/HG002_NA24385_son/PacBio_MtSinai_NIST/PacBio_fasta/m150221_004056_42156.subreads.fasta.gz	PacBio CLR	HG002	Benchmark HG002 on long reads
HG002	ftp://ftp-trace.ncbi.nlm.nih.gov/ReferenceSamples/giab/data/AshkenazimTrio/HG002_NA24385_son/PacBio_MtSinai_NIST/PacBio_fasta/m150221_065149_42177.subreads.fasta.gz	PacBio CLR	HG002	Benchmark HG002 on long reads
HG002	ftp://ftp-trace.ncbi.nlm.nih.gov/ReferenceSamples/giab/data/AshkenazimTrio/HG002_NA24385_son/PacBio_MtSinai_NIST/PacBio_fasta/m150221_065910_42156.subreads.fasta.gz	PacBio CLR	HG002	Benchmark HG002 on long reads
HG002	ftp://ftp-trace.ncbi.nlm.nih.gov/ReferenceSamples/giab/data/AshkenazimTrio/HG002_NA24385_son/PacBio_MtSinai_NIST/PacBio_fasta/m150221_131133_42177.subreads.fasta.gz	PacBio CLR	HG002	Benchmark HG002 on long reads
HG002	ftp://ftp-trace.ncbi.nlm.nih.gov/ReferenceSamples/giab/data/AshkenazimTrio/HG002_NA24385_son/PacBio_MtSinai_NIST/PacBio_fasta/m150221_131823_42156.subreads.fasta.gz	PacBio CLR	HG002	Benchmark HG002 on long reads
HG002	ftp://ftp-trace.ncbi.nlm.nih.gov/ReferenceSamples/giab/data/AshkenazimTrio/HG002_NA24385_son/PacBio_MtSinai_NIST/PacBio_fasta/m150221_193226_42177.subreads.fasta.gz	PacBio CLR	HG002	Benchmark HG002 on long reads
HG002	ftp://ftp-trace.ncbi.nlm.nih.gov/ReferenceSamples/giab/data/AshkenazimTrio/HG002_NA24385_son/PacBio_MtSinai_NIST/PacBio_fasta/m150221_193749_42156.subreads.fasta.gz	PacBio CLR	HG002	Benchmark HG002 on long reads
HG002	ftp://ftp-trace.ncbi.nlm.nih.gov/ReferenceSamples/giab/data/AshkenazimTrio/HG002_NA24385_son/PacBio_MtSinai_NIST/PacBio_fasta/m150222_015316_42177.subreads.fasta.gz	PacBio CLR	HG002	Benchmark HG002 on long reads
HG002	ftp://ftp-trace.ncbi.nlm.nih.gov/ReferenceSamples/giab/data/AshkenazimTrio/HG002_NA24385_son/PacBio_MtSinai_NIST/PacBio_fasta/m150222_015652_42156.subreads.fasta.gz	PacBio CLR	HG002	Benchmark HG002 on long reads
HG002	ftp://ftp-trace.ncbi.nlm.nih.gov/ReferenceSamples/giab/data/AshkenazimTrio/HG002_NA24385_son/PacBio_MtSinai_NIST/PacBio_fasta/m150222_081345_42177.subreads.fasta.gz	PacBio CLR	HG002	Benchmark HG002 on long reads
HG002	ftp://ftp-trace.ncbi.nlm.nih.gov/ReferenceSamples/giab/data/AshkenazimTrio/HG002_NA24385_son/PacBio_MtSinai_NIST/PacBio_fasta/m150222_081617_42156.subreads.fasta.gz	PacBio CLR	HG002	Benchmark HG002 on long reads
HG002	ftp://ftp-trace.ncbi.nlm.nih.gov/ReferenceSamples/giab/data/AshkenazimTrio/HG002_NA24385_son/PacBio_MtSinai_NIST/PacBio_fasta/m150222_143834_42156.subreads.fasta.gz	PacBio CLR	HG002	Benchmark HG002 on long reads
HG002	ftp://ftp-trace.ncbi.nlm.nih.gov/ReferenceSamples/giab/data/AshkenazimTrio/HG002_NA24385_son/PacBio_MtSinai_NIST/PacBio_fasta/m150222_204301_42177.subreads.fasta.gz	PacBio CLR	HG002	Benchmark HG002 on long reads
HG002	ftp://ftp-trace.ncbi.nlm.nih.gov/ReferenceSamples/giab/data/AshkenazimTrio/HG002_NA24385_son/PacBio_MtSinai_NIST/PacBio_fasta/m150222_205428_42156.subreads.fasta.gz	PacBio CLR	HG002	Benchmark HG002 on long reads
HG002	ftp://ftp-trace.ncbi.nlm.nih.gov/ReferenceSamples/giab/data/AshkenazimTrio/HG002_NA24385_son/PacBio_MtSinai_NIST/PacBio_fasta/m150223_051122_42177.subreads.fasta.gz	PacBio CLR	HG002	Benchmark HG002 on long reads
HG002	ftp://ftp-trace.ncbi.nlm.nih.gov/ReferenceSamples/giab/data/AshkenazimTrio/HG002_NA24385_son/PacBio_MtSinai_NIST/PacBio_fasta/m150223_052224_42156.subreads.fasta.gz	PacBio CLR	HG002	Benchmark HG002 on long reads
HG002	ftp://ftp-trace.ncbi.nlm.nih.gov/ReferenceSamples/giab/data/AshkenazimTrio/HG002_NA24385_son/PacBio_MtSinai_NIST/PacBio_fasta/m150223_113024_42177.subreads.fasta.gz	PacBio CLR	HG002	Benchmark HG002 on long reads
HG002	ftp://ftp-trace.ncbi.nlm.nih.gov/ReferenceSamples/giab/data/AshkenazimTrio/HG002_NA24385_son/PacBio_MtSinai_NIST/PacBio_fasta/m150223_114004_42156.subreads.fasta.gz	PacBio CLR	HG002	Benchmark HG002 on long reads
HG002	ftp://ftp-trace.ncbi.nlm.nih.gov/ReferenceSamples/giab/data/AshkenazimTrio/HG002_NA24385_son/PacBio_MtSinai_NIST/PacBio_fasta/m150223_174943_42177.subreads.fasta.gz	PacBio CLR	HG002	Benchmark HG002 on long reads
HG002	ftp://ftp-trace.ncbi.nlm.nih.gov/ReferenceSamples/giab/data/AshkenazimTrio/HG002_NA24385_son/PacBio_MtSinai_NIST/PacBio_fasta/m150223_175917_42156.subreads.fasta.gz	PacBio CLR	HG002	Benchmark HG002 on long reads
HG002	ftp://ftp-trace.ncbi.nlm.nih.gov/ReferenceSamples/giab/data/AshkenazimTrio/HG002_NA24385_son/PacBio_MtSinai_NIST/PacBio_fasta/m150224_000927_42177.subreads.fasta.gz	PacBio CLR	HG002	Benchmark HG002 on long reads
HG002	ftp://ftp-trace.ncbi.nlm.nih.gov/ReferenceSamples/giab/data/AshkenazimTrio/HG002_NA24385_son/PacBio_MtSinai_NIST/PacBio_fasta/m150224_001830_42156.subreads.fasta.gz	PacBio CLR	HG002	Benchmark HG002 on long reads
HG002	ftp://ftp-trace.ncbi.nlm.nih.gov/ReferenceSamples/giab/data/AshkenazimTrio/HG002_NA24385_son/PacBio_MtSinai_NIST/PacBio_fasta/m150224_062910_42177.subreads.fasta.gz	PacBio CLR	HG002	Benchmark HG002 on long reads
HG002	ftp://ftp-trace.ncbi.nlm.nih.gov/ReferenceSamples/giab/data/AshkenazimTrio/HG002_NA24385_son/PacBio_MtSinai_NIST/PacBio_fasta/m150224_063755_42156.subreads.fasta.gz	PacBio CLR	HG002	Benchmark HG002 on long reads
HG002	ftp://ftp-trace.ncbi.nlm.nih.gov/ReferenceSamples/giab/data/AshkenazimTrio/HG002_NA24385_son/PacBio_MtSinai_NIST/PacBio_fasta/m150224_124902_42177.subreads.fasta.gz	PacBio CLR	HG002	Benchmark HG002 on long reads
HG002	ftp://ftp-trace.ncbi.nlm.nih.gov/ReferenceSamples/giab/data/AshkenazimTrio/HG002_NA24385_son/PacBio_MtSinai_NIST/PacBio_fasta/m150224_125656_42156.subreads.fasta.gz	PacBio CLR	HG002	Benchmark HG002 on long reads
HG002	ftp://ftp-trace.ncbi.nlm.nih.gov/ReferenceSamples/giab/data/AshkenazimTrio/HG002_NA24385_son/PacBio_MtSinai_NIST/PacBio_fasta/m150224_191026_42177.subreads.fasta.gz	PacBio CLR	HG002	Benchmark HG002 on long reads
HG002	ftp://ftp-trace.ncbi.nlm.nih.gov/ReferenceSamples/giab/data/AshkenazimTrio/HG002_NA24385_son/PacBio_MtSinai_NIST/PacBio_fasta/m150224_192013_42156.subreads.fasta.gz	PacBio CLR	HG002	Benchmark HG002 on long reads
HG002	ftp://ftp-trace.ncbi.nlm.nih.gov/ReferenceSamples/giab/data/AshkenazimTrio/HG002_NA24385_son/PacBio_MtSinai_NIST/PacBio_fasta/m150225_012540_42177.subreads.fasta.gz	PacBio CLR	HG002	Benchmark HG002 on long reads
HG002	ftp://ftp-trace.ncbi.nlm.nih.gov/ReferenceSamples/giab/data/AshkenazimTrio/HG002_NA24385_son/PacBio_MtSinai_NIST/PacBio_fasta/m150225_013529_42156.subreads.fasta.gz	PacBio CLR	HG002	Benchmark HG002 on long reads
HG00864 phased genome	https://ftp.1000genomes.ebi.ac.uk/vol1/ftp/data_collections/HGSVC2/release/v1.0/assemblies/20200612_HHU_assembly-results_CLR_v12/assemblies/phased/v12_HG00864_hgsvc_pbsq2-clr_1000-flye.h1-un.arrow-p1.fasta .	PacBio CLR	HG00864 phased genome	Benchmark on diploid phased datasets
HG00864 phased genome	https://ftp.1000genomes.ebi.ac.uk/vol1/ftp/data_collections/HGSVC2/release/v1.0/assemblies/20200612_HHU_assembly-results_CLR_v12/assemblies/phased/v12_HG00864_hgsvc_pbsq2-clr_1000-flye.h1-un.arrow-p1.fasta.fai .	PacBio CLR	HG00864 phased genome	Benchmark on diploid phased datasets
HG00864 phased genome	https://ftp.1000genomes.ebi.ac.uk/vol1/ftp/data_collections/HGSVC2/release/v1.0/assemblies/20200612_HHU_assembly-results_CLR_v12/assemblies/phased/v12_HG00864_hgsvc_pbsq2-clr_1000-flye.h2-un.arrow-p1.fasta .	PacBio CLR	HG00864 phased genome	Benchmark on diploid phased datasets
HG00864 phased genome	https://ftp.1000genomes.ebi.ac.uk/vol1/ftp/data_collections/HGSVC2/release/v1.0/assemblies/20200612_HHU_assembly-results_CLR_v12/assemblies/phased/v12_HG00864_hgsvc_pbsq2-clr_1000-flye.h2-un.arrow-p1.fasta.fai .	PacBio CLR	HG00864 phased genome	Benchmark on diploid phased datasets
HG01596 phased genome	https://ftp.1000genomes.ebi.ac.uk/vol1/ftp/data_collections/HGSVC2/release/v1.0/assemblies/20200612_HHU_assembly-results_CLR_v12/assemblies/phased/v12_HG01596_hgsvc_pbsq2-clr_1000-flye.h1-un.arrow-p1.fasta .	PacBio CLR	HG01596 phased genome	Benchmark on diploid phased datasets
HG01596 phased genome	https://ftp.1000genomes.ebi.ac.uk/vol1/ftp/data_collections/HGSVC2/release/v1.0/assemblies/20200612_HHU_assembly-results_CLR_v12/assemblies/phased/v12_HG01596_hgsvc_pbsq2-clr_1000-flye.h1-un.arrow-p1.fasta.fai .	PacBio CLR	HG01596 phased genome	Benchmark on diploid phased datasets
HG01596 phased genome	https://ftp.1000genomes.ebi.ac.uk/vol1/ftp/data_collections/HGSVC2/release/v1.0/assemblies/20200612_HHU_assembly-results_CLR_v12/assemblies/phased/v12_HG01596_hgsvc_pbsq2-clr_1000-flye.h2-un.arrow-p1.fasta .	PacBio CLR	HG01596 phased genome	Benchmark on diploid phased datasets
HG01596 phased genome	https://ftp.1000genomes.ebi.ac.uk/vol1/ftp/data_collections/HGSVC2/release/v1.0/assemblies/20200612_HHU_assembly-results_CLR_v12/assemblies/phased/v12_HG01596_hgsvc_pbsq2-clr_1000-flye.h2-un.arrow-p1.fasta.fai .	PacBio CLR	HG01596 phased genome	Benchmark on diploid phased datasets
HG02818 phased genome	https://ftp.1000genomes.ebi.ac.uk/vol1/ftp/data_collections/HGSVC2/release/v1.0/assemblies/20200717_HHU_assembly-results_CCS_v12/assemblies/phased/v12_HG02818_hgsvc_pbsq2-ccs_1000-pereg.h1-un.racon-p2.fasta	PacBio CCS	HG02818 phased genome	Benchmark on diploid phased datasets
HG02818 phased genome	https://ftp.1000genomes.ebi.ac.uk/vol1/ftp/data_collections/HGSVC2/release/v1.0/assemblies/20200717_HHU_assembly-results_CCS_v12/assemblies/phased/v12_HG02818_hgsvc_pbsq2-ccs_1000-pereg.h1-un.racon-p2.fasta.fai	PacBio CCS	HG02818 phased genome	Benchmark on diploid phased datasets
HG02818 phased genome	https://ftp.1000genomes.ebi.ac.uk/vol1/ftp/data_collections/HGSVC2/release/v1.0/assemblies/20200717_HHU_assembly-results_CCS_v12/assemblies/phased/v12_HG02818_hgsvc_pbsq2-ccs_1000-pereg.h2-un.racon-p2.fasta	PacBio CCS	HG02818 phased genome	Benchmark on diploid phased datasets
HG02818 phased genome	https://ftp.1000genomes.ebi.ac.uk/vol1/ftp/data_collections/HGSVC2/release/v1.0/assemblies/20200717_HHU_assembly-results_CCS_v12/assemblies/phased/v12_HG02818_hgsvc_pbsq2-ccs_1000-pereg.h2-un.racon-p2.fasta.fai	PacBio CCS	HG02818 phased genome	Benchmark on diploid phased datasets
HG00512 phased genome	https://ftp.1000genomes.ebi.ac.uk/vol1/ftp/data_collections/HGSVC2/release/v1.0/assemblies/20200628_HHU_assembly-results_CCS_v12/assemblies/phased/v12_HG00512_hgsvc_pbsq2-ccs_1000-pereg.h1-un.racon-p2.fasta	PacBio CCS	HG00512 phased genome	Benchmark on diploid phased datasets
HG00512 phased genome	https://ftp.1000genomes.ebi.ac.uk/vol1/ftp/data_collections/HGSVC2/release/v1.0/assemblies/20200628_HHU_assembly-results_CCS_v12/assemblies/phased/v12_HG00512_hgsvc_pbsq2-ccs_1000-pereg.h1-un.racon-p2.fasta.fai	PacBio CCS	HG00512 phased genome	Benchmark on diploid phased datasets
HG00512 phased genome	https://ftp.1000genomes.ebi.ac.uk/vol1/ftp/data_collections/HGSVC2/release/v1.0/assemblies/20200628_HHU_assembly-results_CCS_v12/assemblies/phased/v12_HG00512_hgsvc_pbsq2-ccs_1000-pereg.h2-un.racon-p2.fasta	PacBio CCS	HG00512 phased genome	Benchmark on diploid phased datasets
HG00512 phased genome	https://ftp.1000genomes.ebi.ac.uk/vol1/ftp/data_collections/HGSVC2/release/v1.0/assemblies/20200628_HHU_assembly-results_CCS_v12/assemblies/phased/v12_HG00512_hgsvc_pbsq2-ccs_1000-pereg.h2-un.racon-p2.fasta.fai	PacBio CCS	HG00512 phased genome	Benchmark on diploid phased datasets
HG02818	https://ftp.1000genomes.ebi.ac.uk/vol1/ftp/data_collections/HGSVC2/release/v1.0/assemblies/20200717_HHU_assembly-results_CCS_v12/haploid_reads/v12_HG02818_hgsvc_pbsq2-ccs_1000.h1-un.cluster1.fastq.gz	PacBio CCS	HG02818	Benchmark on diploid phased datasets
HG02818	https://ftp.1000genomes.ebi.ac.uk/vol1/ftp/data_collections/HGSVC2/release/v1.0/assemblies/20200717_HHU_assembly-results_CCS_v12/haploid_reads/v12_HG02818_hgsvc_pbsq2-ccs_1000.h1-un.cluster2.fastq.gz	PacBio CCS	HG02818	Benchmark on diploid phased datasets
HG02818	https://ftp.1000genomes.ebi.ac.uk/vol1/ftp/data_collections/HGSVC2/release/v1.0/assemblies/20200717_HHU_assembly-results_CCS_v12/haploid_reads/v12_HG02818_hgsvc_pbsq2-ccs_1000.h1-un.cluster3.fastq.gz	PacBio CCS	HG02818	Benchmark on diploid phased datasets
HG02818	https://ftp.1000genomes.ebi.ac.uk/vol1/ftp/data_collections/HGSVC2/release/v1.0/assemblies/20200717_HHU_assembly-results_CCS_v12/haploid_reads/v12_HG02818_hgsvc_pbsq2-ccs_1000.h1-un.cluster4.fastq.gz	PacBio CCS	HG02818	Benchmark on diploid phased datasets
HG02818	https://ftp.1000genomes.ebi.ac.uk/vol1/ftp/data_collections/HGSVC2/release/v1.0/assemblies/20200717_HHU_assembly-results_CCS_v12/haploid_reads/v12_HG02818_hgsvc_pbsq2-ccs_1000.h1-un.cluster5.fastq.gz	PacBio CCS	HG02818	Benchmark on diploid phased datasets
HG02818	https://ftp.1000genomes.ebi.ac.uk/vol1/ftp/data_collections/HGSVC2/release/v1.0/assemblies/20200717_HHU_assembly-results_CCS_v12/haploid_reads/v12_HG02818_hgsvc_pbsq2-ccs_1000.h1-un.cluster6.fastq.gz	PacBio CCS	HG02818	Benchmark on diploid phased datasets
HG02818	https://ftp.1000genomes.ebi.ac.uk/vol1/ftp/data_collections/HGSVC2/release/v1.0/assemblies/20200717_HHU_assembly-results_CCS_v12/haploid_reads/v12_HG02818_hgsvc_pbsq2-ccs_1000.h1-un.cluster7.fastq.gz	PacBio CCS	HG02818	Benchmark on diploid phased datasets
HG02818	https://ftp.1000genomes.ebi.ac.uk/vol1/ftp/data_collections/HGSVC2/release/v1.0/assemblies/20200717_HHU_assembly-results_CCS_v12/haploid_reads/v12_HG02818_hgsvc_pbsq2-ccs_1000.h1-un.cluster8.fastq.gz	PacBio CCS	HG02818	Benchmark on diploid phased datasets
HG02818	https://ftp.1000genomes.ebi.ac.uk/vol1/ftp/data_collections/HGSVC2/release/v1.0/assemblies/20200717_HHU_assembly-results_CCS_v12/haploid_reads/v12_HG02818_hgsvc_pbsq2-ccs_1000.h1-un.cluster9.fastq.gz	PacBio CCS	HG02818	Benchmark on diploid phased datasets
HG02818	https://ftp.1000genomes.ebi.ac.uk/vol1/ftp/data_collections/HGSVC2/release/v1.0/assemblies/20200717_HHU_assembly-results_CCS_v12/haploid_reads/v12_HG02818_hgsvc_pbsq2-ccs_1000.h1-un.cluster10.fastq.gz	PacBio CCS	HG02818	Benchmark on diploid phased datasets
HG02818	https://ftp.1000genomes.ebi.ac.uk/vol1/ftp/data_collections/HGSVC2/release/v1.0/assemblies/20200717_HHU_assembly-results_CCS_v12/haploid_reads/v12_HG02818_hgsvc_pbsq2-ccs_1000.h1-un.cluster11.fastq.gz	PacBio CCS	HG02818	Benchmark on diploid phased datasets
HG02818	https://ftp.1000genomes.ebi.ac.uk/vol1/ftp/data_collections/HGSVC2/release/v1.0/assemblies/20200717_HHU_assembly-results_CCS_v12/haploid_reads/v12_HG02818_hgsvc_pbsq2-ccs_1000.h1-un.cluster12.fastq.gz	PacBio CCS	HG02818	Benchmark on diploid phased datasets
HG02818	https://ftp.1000genomes.ebi.ac.uk/vol1/ftp/data_collections/HGSVC2/release/v1.0/assemblies/20200717_HHU_assembly-results_CCS_v12/haploid_reads/v12_HG02818_hgsvc_pbsq2-ccs_1000.h1-un.cluster13.fastq.gz	PacBio CCS	HG02818	Benchmark on diploid phased datasets
HG02818	https://ftp.1000genomes.ebi.ac.uk/vol1/ftp/data_collections/HGSVC2/release/v1.0/assemblies/20200717_HHU_assembly-results_CCS_v12/haploid_reads/v12_HG02818_hgsvc_pbsq2-ccs_1000.h1-un.cluster14.fastq.gz	PacBio CCS	HG02818	Benchmark on diploid phased datasets
HG02818	https://ftp.1000genomes.ebi.ac.uk/vol1/ftp/data_collections/HGSVC2/release/v1.0/assemblies/20200717_HHU_assembly-results_CCS_v12/haploid_reads/v12_HG02818_hgsvc_pbsq2-ccs_1000.h1-un.cluster15.fastq.gz	PacBio CCS	HG02818	Benchmark on diploid phased datasets
HG02818	https://ftp.1000genomes.ebi.ac.uk/vol1/ftp/data_collections/HGSVC2/release/v1.0/assemblies/20200717_HHU_assembly-results_CCS_v12/haploid_reads/v12_HG02818_hgsvc_pbsq2-ccs_1000.h1-un.cluster16.fastq.gz	PacBio CCS	HG02818	Benchmark on diploid phased datasets
HG02818	https://ftp.1000genomes.ebi.ac.uk/vol1/ftp/data_collections/HGSVC2/release/v1.0/assemblies/20200717_HHU_assembly-results_CCS_v12/haploid_reads/v12_HG02818_hgsvc_pbsq2-ccs_1000.h1-un.cluster17.fastq.gz	PacBio CCS	HG02818	Benchmark on diploid phased datasets
HG02818	https://ftp.1000genomes.ebi.ac.uk/vol1/ftp/data_collections/HGSVC2/release/v1.0/assemblies/20200717_HHU_assembly-results_CCS_v12/haploid_reads/v12_HG02818_hgsvc_pbsq2-ccs_1000.h1-un.cluster18.fastq.gz	PacBio CCS	HG02818	Benchmark on diploid phased datasets
HG02818	https://ftp.1000genomes.ebi.ac.uk/vol1/ftp/data_collections/HGSVC2/release/v1.0/assemblies/20200717_HHU_assembly-results_CCS_v12/haploid_reads/v12_HG02818_hgsvc_pbsq2-ccs_1000.h1-un.cluster19.fastq.gz	PacBio CCS	HG02818	Benchmark on diploid phased datasets
HG02818	https://ftp.1000genomes.ebi.ac.uk/vol1/ftp/data_collections/HGSVC2/release/v1.0/assemblies/20200717_HHU_assembly-results_CCS_v12/haploid_reads/v12_HG02818_hgsvc_pbsq2-ccs_1000.h1-un.cluster20.fastq.gz	PacBio CCS	HG02818	Benchmark on diploid phased datasets
HG02818	https://ftp.1000genomes.ebi.ac.uk/vol1/ftp/data_collections/HGSVC2/release/v1.0/assemblies/20200717_HHU_assembly-results_CCS_v12/haploid_reads/v12_HG02818_hgsvc_pbsq2-ccs_1000.h1-un.cluster21.fastq.gz	PacBio CCS	HG02818	Benchmark on diploid phased datasets
HG02818	https://ftp.1000genomes.ebi.ac.uk/vol1/ftp/data_collections/HGSVC2/release/v1.0/assemblies/20200717_HHU_assembly-results_CCS_v12/haploid_reads/v12_HG02818_hgsvc_pbsq2-ccs_1000.h1-un.cluster22.fastq.gz	PacBio CCS	HG02818	Benchmark on diploid phased datasets
HG02818	https://ftp.1000genomes.ebi.ac.uk/vol1/ftp/data_collections/HGSVC2/release/v1.0/assemblies/20200717_HHU_assembly-results_CCS_v12/haploid_reads/v12_HG02818_hgsvc_pbsq2-ccs_1000.h1-un.cluster23.fastq.gz	PacBio CCS	HG02818	Benchmark on diploid phased datasets
HG02818	https://ftp.1000genomes.ebi.ac.uk/vol1/ftp/data_collections/HGSVC2/release/v1.0/assemblies/20200717_HHU_assembly-results_CCS_v12/haploid_reads/v12_HG02818_hgsvc_pbsq2-ccs_1000.h1-un.cluster24.fastq.gz	PacBio CCS	HG02818	Benchmark on diploid phased datasets
HG02818	https://ftp.1000genomes.ebi.ac.uk/vol1/ftp/data_collections/HGSVC2/release/v1.0/assemblies/20200717_HHU_assembly-results_CCS_v12/haploid_reads/v12_HG02818_hgsvc_pbsq2-ccs_1000.h2-un.cluster1.fastq.gz	PacBio CCS	HG02818	Benchmark on diploid phased datasets
HG02818	https://ftp.1000genomes.ebi.ac.uk/vol1/ftp/data_collections/HGSVC2/release/v1.0/assemblies/20200717_HHU_assembly-results_CCS_v12/haploid_reads/v12_HG02818_hgsvc_pbsq2-ccs_1000.h2-un.cluster2.fastq.gz	PacBio CCS	HG02818	Benchmark on diploid phased datasets
HG02818	https://ftp.1000genomes.ebi.ac.uk/vol1/ftp/data_collections/HGSVC2/release/v1.0/assemblies/20200717_HHU_assembly-results_CCS_v12/haploid_reads/v12_HG02818_hgsvc_pbsq2-ccs_1000.h2-un.cluster3.fastq.gz	PacBio CCS	HG02818	Benchmark on diploid phased datasets
HG02818	https://ftp.1000genomes.ebi.ac.uk/vol1/ftp/data_collections/HGSVC2/release/v1.0/assemblies/20200717_HHU_assembly-results_CCS_v12/haploid_reads/v12_HG02818_hgsvc_pbsq2-ccs_1000.h2-un.cluster4.fastq.gz	PacBio CCS	HG02818	Benchmark on diploid phased datasets
HG02818	https://ftp.1000genomes.ebi.ac.uk/vol1/ftp/data_collections/HGSVC2/release/v1.0/assemblies/20200717_HHU_assembly-results_CCS_v12/haploid_reads/v12_HG02818_hgsvc_pbsq2-ccs_1000.h2-un.cluster5.fastq.gz	PacBio CCS	HG02818	Benchmark on diploid phased datasets
HG02818	https://ftp.1000genomes.ebi.ac.uk/vol1/ftp/data_collections/HGSVC2/release/v1.0/assemblies/20200717_HHU_assembly-results_CCS_v12/haploid_reads/v12_HG02818_hgsvc_pbsq2-ccs_1000.h2-un.cluster6.fastq.gz	PacBio CCS	HG02818	Benchmark on diploid phased datasets
HG02818	https://ftp.1000genomes.ebi.ac.uk/vol1/ftp/data_collections/HGSVC2/release/v1.0/assemblies/20200717_HHU_assembly-results_CCS_v12/haploid_reads/v12_HG02818_hgsvc_pbsq2-ccs_1000.h2-un.cluster7.fastq.gz	PacBio CCS	HG02818	Benchmark on diploid phased datasets
HG02818	https://ftp.1000genomes.ebi.ac.uk/vol1/ftp/data_collections/HGSVC2/release/v1.0/assemblies/20200717_HHU_assembly-results_CCS_v12/haploid_reads/v12_HG02818_hgsvc_pbsq2-ccs_1000.h2-un.cluster8.fastq.gz	PacBio CCS	HG02818	Benchmark on diploid phased datasets
HG02818	https://ftp.1000genomes.ebi.ac.uk/vol1/ftp/data_collections/HGSVC2/release/v1.0/assemblies/20200717_HHU_assembly-results_CCS_v12/haploid_reads/v12_HG02818_hgsvc_pbsq2-ccs_1000.h2-un.cluster9.fastq.gz	PacBio CCS	HG02818	Benchmark on diploid phased datasets
HG02818	https://ftp.1000genomes.ebi.ac.uk/vol1/ftp/data_collections/HGSVC2/release/v1.0/assemblies/20200717_HHU_assembly-results_CCS_v12/haploid_reads/v12_HG02818_hgsvc_pbsq2-ccs_1000.h2-un.cluster10.fastq.gz	PacBio CCS	HG02818	Benchmark on diploid phased datasets
HG02818	https://ftp.1000genomes.ebi.ac.uk/vol1/ftp/data_collections/HGSVC2/release/v1.0/assemblies/20200717_HHU_assembly-results_CCS_v12/haploid_reads/v12_HG02818_hgsvc_pbsq2-ccs_1000.h2-un.cluster11.fastq.gz	PacBio CCS	HG02818	Benchmark on diploid phased datasets
HG02818	https://ftp.1000genomes.ebi.ac.uk/vol1/ftp/data_collections/HGSVC2/release/v1.0/assemblies/20200717_HHU_assembly-results_CCS_v12/haploid_reads/v12_HG02818_hgsvc_pbsq2-ccs_1000.h2-un.cluster12.fastq.gz	PacBio CCS	HG02818	Benchmark on diploid phased datasets
HG02818	https://ftp.1000genomes.ebi.ac.uk/vol1/ftp/data_collections/HGSVC2/release/v1.0/assemblies/20200717_HHU_assembly-results_CCS_v12/haploid_reads/v12_HG02818_hgsvc_pbsq2-ccs_1000.h2-un.cluster13.fastq.gz	PacBio CCS	HG02818	Benchmark on diploid phased datasets
HG02818	https://ftp.1000genomes.ebi.ac.uk/vol1/ftp/data_collections/HGSVC2/release/v1.0/assemblies/20200717_HHU_assembly-results_CCS_v12/haploid_reads/v12_HG02818_hgsvc_pbsq2-ccs_1000.h2-un.cluster14.fastq.gz	PacBio CCS	HG02818	Benchmark on diploid phased datasets
HG02818	https://ftp.1000genomes.ebi.ac.uk/vol1/ftp/data_collections/HGSVC2/release/v1.0/assemblies/20200717_HHU_assembly-results_CCS_v12/haploid_reads/v12_HG02818_hgsvc_pbsq2-ccs_1000.h2-un.cluster15.fastq.gz	PacBio CCS	HG02818	Benchmark on diploid phased datasets
HG02818	https://ftp.1000genomes.ebi.ac.uk/vol1/ftp/data_collections/HGSVC2/release/v1.0/assemblies/20200717_HHU_assembly-results_CCS_v12/haploid_reads/v12_HG02818_hgsvc_pbsq2-ccs_1000.h2-un.cluster16.fastq.gz	PacBio CCS	HG02818	Benchmark on diploid phased datasets
HG02818	https://ftp.1000genomes.ebi.ac.uk/vol1/ftp/data_collections/HGSVC2/release/v1.0/assemblies/20200717_HHU_assembly-results_CCS_v12/haploid_reads/v12_HG02818_hgsvc_pbsq2-ccs_1000.h2-un.cluster17.fastq.gz	PacBio CCS	HG02818	Benchmark on diploid phased datasets
HG02818	https://ftp.1000genomes.ebi.ac.uk/vol1/ftp/data_collections/HGSVC2/release/v1.0/assemblies/20200717_HHU_assembly-results_CCS_v12/haploid_reads/v12_HG02818_hgsvc_pbsq2-ccs_1000.h2-un.cluster18.fastq.gz	PacBio CCS	HG02818	Benchmark on diploid phased datasets
HG02818	https://ftp.1000genomes.ebi.ac.uk/vol1/ftp/data_collections/HGSVC2/release/v1.0/assemblies/20200717_HHU_assembly-results_CCS_v12/haploid_reads/v12_HG02818_hgsvc_pbsq2-ccs_1000.h2-un.cluster19.fastq.gz	PacBio CCS	HG02818	Benchmark on diploid phased datasets
HG02818	https://ftp.1000genomes.ebi.ac.uk/vol1/ftp/data_collections/HGSVC2/release/v1.0/assemblies/20200717_HHU_assembly-results_CCS_v12/haploid_reads/v12_HG02818_hgsvc_pbsq2-ccs_1000.h2-un.cluster20.fastq.gz	PacBio CCS	HG02818	Benchmark on diploid phased datasets
HG02818	https://ftp.1000genomes.ebi.ac.uk/vol1/ftp/data_collections/HGSVC2/release/v1.0/assemblies/20200717_HHU_assembly-results_CCS_v12/haploid_reads/v12_HG02818_hgsvc_pbsq2-ccs_1000.h2-un.cluster21.fastq.gz	PacBio CCS	HG02818	Benchmark on diploid phased datasets
HG02818	https://ftp.1000genomes.ebi.ac.uk/vol1/ftp/data_collections/HGSVC2/release/v1.0/assemblies/20200717_HHU_assembly-results_CCS_v12/haploid_reads/v12_HG02818_hgsvc_pbsq2-ccs_1000.h2-un.cluster22.fastq.gz	PacBio CCS	HG02818	Benchmark on diploid phased datasets
HG02818	https://ftp.1000genomes.ebi.ac.uk/vol1/ftp/data_collections/HGSVC2/release/v1.0/assemblies/20200717_HHU_assembly-results_CCS_v12/haploid_reads/v12_HG02818_hgsvc_pbsq2-ccs_1000.h2-un.cluster23.fastq.gz	PacBio CCS	HG02818	Benchmark on diploid phased datasets
HG02818	https://ftp.1000genomes.ebi.ac.uk/vol1/ftp/data_collections/HGSVC2/release/v1.0/assemblies/20200717_HHU_assembly-results_CCS_v12/haploid_reads/v12_HG02818_hgsvc_pbsq2-ccs_1000.h2-un.cluster24.fastq.gz	PacBio CCS	HG02818	Benchmark on diploid phased datasets
HG00512	https://ftp.1000genomes.ebi.ac.uk/vol1/ftp/data_collections/HGSVC2/release/v1.0/assemblies/20200628_HHU_assembly-results_CCS_v12/haploid_reads/v12_HG00512_hgsvc_pbsq2-ccs_1000.h1-un.cluster1.fastq.gz	PacBio CCS	HG00512	Benchmark on diploid phased datasets
HG00512	https://ftp.1000genomes.ebi.ac.uk/vol1/ftp/data_collections/HGSVC2/release/v1.0/assemblies/20200628_HHU_assembly-results_CCS_v12/haploid_reads/v12_HG00512_hgsvc_pbsq2-ccs_1000.h1-un.cluster2.fastq.gz	PacBio CCS	HG00512	Benchmark on diploid phased datasets
HG00512	https://ftp.1000genomes.ebi.ac.uk/vol1/ftp/data_collections/HGSVC2/release/v1.0/assemblies/20200628_HHU_assembly-results_CCS_v12/haploid_reads/v12_HG00512_hgsvc_pbsq2-ccs_1000.h1-un.cluster3.fastq.gz	PacBio CCS	HG00512	Benchmark on diploid phased datasets
HG00512	https://ftp.1000genomes.ebi.ac.uk/vol1/ftp/data_collections/HGSVC2/release/v1.0/assemblies/20200628_HHU_assembly-results_CCS_v12/haploid_reads/v12_HG00512_hgsvc_pbsq2-ccs_1000.h1-un.cluster4.fastq.gz	PacBio CCS	HG00512	Benchmark on diploid phased datasets
HG00512	https://ftp.1000genomes.ebi.ac.uk/vol1/ftp/data_collections/HGSVC2/release/v1.0/assemblies/20200628_HHU_assembly-results_CCS_v12/haploid_reads/v12_HG00512_hgsvc_pbsq2-ccs_1000.h1-un.cluster5.fastq.gz	PacBio CCS	HG00512	Benchmark on diploid phased datasets
HG00512	https://ftp.1000genomes.ebi.ac.uk/vol1/ftp/data_collections/HGSVC2/release/v1.0/assemblies/20200628_HHU_assembly-results_CCS_v12/haploid_reads/v12_HG00512_hgsvc_pbsq2-ccs_1000.h1-un.cluster6.fastq.gz	PacBio CCS	HG00512	Benchmark on diploid phased datasets
HG00512	https://ftp.1000genomes.ebi.ac.uk/vol1/ftp/data_collections/HGSVC2/release/v1.0/assemblies/20200628_HHU_assembly-results_CCS_v12/haploid_reads/v12_HG00512_hgsvc_pbsq2-ccs_1000.h1-un.cluster7.fastq.gz	PacBio CCS	HG00512	Benchmark on diploid phased datasets
HG00512	https://ftp.1000genomes.ebi.ac.uk/vol1/ftp/data_collections/HGSVC2/release/v1.0/assemblies/20200628_HHU_assembly-results_CCS_v12/haploid_reads/v12_HG00512_hgsvc_pbsq2-ccs_1000.h1-un.cluster8.fastq.gz	PacBio CCS	HG00512	Benchmark on diploid phased datasets
HG00512	https://ftp.1000genomes.ebi.ac.uk/vol1/ftp/data_collections/HGSVC2/release/v1.0/assemblies/20200628_HHU_assembly-results_CCS_v12/haploid_reads/v12_HG00512_hgsvc_pbsq2-ccs_1000.h1-un.cluster9.fastq.gz	PacBio CCS	HG00512	Benchmark on diploid phased datasets
HG00512	https://ftp.1000genomes.ebi.ac.uk/vol1/ftp/data_collections/HGSVC2/release/v1.0/assemblies/20200628_HHU_assembly-results_CCS_v12/haploid_reads/v12_HG00512_hgsvc_pbsq2-ccs_1000.h1-un.cluster10.fastq.gz	PacBio CCS	HG00512	Benchmark on diploid phased datasets
HG00512	https://ftp.1000genomes.ebi.ac.uk/vol1/ftp/data_collections/HGSVC2/release/v1.0/assemblies/20200628_HHU_assembly-results_CCS_v12/haploid_reads/v12_HG00512_hgsvc_pbsq2-ccs_1000.h1-un.cluster11.fastq.gz	PacBio CCS	HG00512	Benchmark on diploid phased datasets
HG00512	https://ftp.1000genomes.ebi.ac.uk/vol1/ftp/data_collections/HGSVC2/release/v1.0/assemblies/20200628_HHU_assembly-results_CCS_v12/haploid_reads/v12_HG00512_hgsvc_pbsq2-ccs_1000.h1-un.cluster12.fastq.gz	PacBio CCS	HG00512	Benchmark on diploid phased datasets
HG00512	https://ftp.1000genomes.ebi.ac.uk/vol1/ftp/data_collections/HGSVC2/release/v1.0/assemblies/20200628_HHU_assembly-results_CCS_v12/haploid_reads/v12_HG00512_hgsvc_pbsq2-ccs_1000.h1-un.cluster13.fastq.gz	PacBio CCS	HG00512	Benchmark on diploid phased datasets
HG00512	https://ftp.1000genomes.ebi.ac.uk/vol1/ftp/data_collections/HGSVC2/release/v1.0/assemblies/20200628_HHU_assembly-results_CCS_v12/haploid_reads/v12_HG00512_hgsvc_pbsq2-ccs_1000.h1-un.cluster14.fastq.gz	PacBio CCS	HG00512	Benchmark on diploid phased datasets
HG00512	https://ftp.1000genomes.ebi.ac.uk/vol1/ftp/data_collections/HGSVC2/release/v1.0/assemblies/20200628_HHU_assembly-results_CCS_v12/haploid_reads/v12_HG00512_hgsvc_pbsq2-ccs_1000.h1-un.cluster15.fastq.gz	PacBio CCS	HG00512	Benchmark on diploid phased datasets
HG00512	https://ftp.1000genomes.ebi.ac.uk/vol1/ftp/data_collections/HGSVC2/release/v1.0/assemblies/20200628_HHU_assembly-results_CCS_v12/haploid_reads/v12_HG00512_hgsvc_pbsq2-ccs_1000.h1-un.cluster16.fastq.gz	PacBio CCS	HG00512	Benchmark on diploid phased datasets
HG00512	https://ftp.1000genomes.ebi.ac.uk/vol1/ftp/data_collections/HGSVC2/release/v1.0/assemblies/20200628_HHU_assembly-results_CCS_v12/haploid_reads/v12_HG00512_hgsvc_pbsq2-ccs_1000.h1-un.cluster17.fastq.gz	PacBio CCS	HG00512	Benchmark on diploid phased datasets
HG00512	https://ftp.1000genomes.ebi.ac.uk/vol1/ftp/data_collections/HGSVC2/release/v1.0/assemblies/20200628_HHU_assembly-results_CCS_v12/haploid_reads/v12_HG00512_hgsvc_pbsq2-ccs_1000.h1-un.cluster18.fastq.gz	PacBio CCS	HG00512	Benchmark on diploid phased datasets
HG00512	https://ftp.1000genomes.ebi.ac.uk/vol1/ftp/data_collections/HGSVC2/release/v1.0/assemblies/20200628_HHU_assembly-results_CCS_v12/haploid_reads/v12_HG00512_hgsvc_pbsq2-ccs_1000.h1-un.cluster19.fastq.gz	PacBio CCS	HG00512	Benchmark on diploid phased datasets
HG00512	https://ftp.1000genomes.ebi.ac.uk/vol1/ftp/data_collections/HGSVC2/release/v1.0/assemblies/20200628_HHU_assembly-results_CCS_v12/haploid_reads/v12_HG00512_hgsvc_pbsq2-ccs_1000.h1-un.cluster20.fastq.gz	PacBio CCS	HG00512	Benchmark on diploid phased datasets
HG00512	https://ftp.1000genomes.ebi.ac.uk/vol1/ftp/data_collections/HGSVC2/release/v1.0/assemblies/20200628_HHU_assembly-results_CCS_v12/haploid_reads/v12_HG00512_hgsvc_pbsq2-ccs_1000.h1-un.cluster21.fastq.gz	PacBio CCS	HG00512	Benchmark on diploid phased datasets
HG00512	https://ftp.1000genomes.ebi.ac.uk/vol1/ftp/data_collections/HGSVC2/release/v1.0/assemblies/20200628_HHU_assembly-results_CCS_v12/haploid_reads/v12_HG00512_hgsvc_pbsq2-ccs_1000.h1-un.cluster22.fastq.gz	PacBio CCS	HG00512	Benchmark on diploid phased datasets
HG00512	https://ftp.1000genomes.ebi.ac.uk/vol1/ftp/data_collections/HGSVC2/release/v1.0/assemblies/20200628_HHU_assembly-results_CCS_v12/haploid_reads/v12_HG00512_hgsvc_pbsq2-ccs_1000.h1-un.cluster23.fastq.gz	PacBio CCS	HG00512	Benchmark on diploid phased datasets
HG00512	https://ftp.1000genomes.ebi.ac.uk/vol1/ftp/data_collections/HGSVC2/release/v1.0/assemblies/20200628_HHU_assembly-results_CCS_v12/haploid_reads/v12_HG00512_hgsvc_pbsq2-ccs_1000.h1-un.cluster24.fastq.gz	PacBio CCS	HG00512	Benchmark on diploid phased datasets
HG00512	https://ftp.1000genomes.ebi.ac.uk/vol1/ftp/data_collections/HGSVC2/release/v1.0/assemblies/20200628_HHU_assembly-results_CCS_v12/haploid_reads/v12_HG00512_hgsvc_pbsq2-ccs_1000.h2-un.cluster1.fastq.gz	PacBio CCS	HG00512	Benchmark on diploid phased datasets
HG00512	https://ftp.1000genomes.ebi.ac.uk/vol1/ftp/data_collections/HGSVC2/release/v1.0/assemblies/20200628_HHU_assembly-results_CCS_v12/haploid_reads/v12_HG00512_hgsvc_pbsq2-ccs_1000.h2-un.cluster2.fastq.gz	PacBio CCS	HG00512	Benchmark on diploid phased datasets
HG00512	https://ftp.1000genomes.ebi.ac.uk/vol1/ftp/data_collections/HGSVC2/release/v1.0/assemblies/20200628_HHU_assembly-results_CCS_v12/haploid_reads/v12_HG00512_hgsvc_pbsq2-ccs_1000.h2-un.cluster3.fastq.gz	PacBio CCS	HG00512	Benchmark on diploid phased datasets
HG00512	https://ftp.1000genomes.ebi.ac.uk/vol1/ftp/data_collections/HGSVC2/release/v1.0/assemblies/20200628_HHU_assembly-results_CCS_v12/haploid_reads/v12_HG00512_hgsvc_pbsq2-ccs_1000.h2-un.cluster4.fastq.gz	PacBio CCS	HG00512	Benchmark on diploid phased datasets
HG00512	https://ftp.1000genomes.ebi.ac.uk/vol1/ftp/data_collections/HGSVC2/release/v1.0/assemblies/20200628_HHU_assembly-results_CCS_v12/haploid_reads/v12_HG00512_hgsvc_pbsq2-ccs_1000.h2-un.cluster5.fastq.gz	PacBio CCS	HG00512	Benchmark on diploid phased datasets
HG00512	https://ftp.1000genomes.ebi.ac.uk/vol1/ftp/data_collections/HGSVC2/release/v1.0/assemblies/20200628_HHU_assembly-results_CCS_v12/haploid_reads/v12_HG00512_hgsvc_pbsq2-ccs_1000.h2-un.cluster6.fastq.gz	PacBio CCS	HG00512	Benchmark on diploid phased datasets
HG00512	https://ftp.1000genomes.ebi.ac.uk/vol1/ftp/data_collections/HGSVC2/release/v1.0/assemblies/20200628_HHU_assembly-results_CCS_v12/haploid_reads/v12_HG00512_hgsvc_pbsq2-ccs_1000.h2-un.cluster7.fastq.gz	PacBio CCS	HG00512	Benchmark on diploid phased datasets
HG00512	https://ftp.1000genomes.ebi.ac.uk/vol1/ftp/data_collections/HGSVC2/release/v1.0/assemblies/20200628_HHU_assembly-results_CCS_v12/haploid_reads/v12_HG00512_hgsvc_pbsq2-ccs_1000.h2-un.cluster8.fastq.gz	PacBio CCS	HG00512	Benchmark on diploid phased datasets
HG00512	https://ftp.1000genomes.ebi.ac.uk/vol1/ftp/data_collections/HGSVC2/release/v1.0/assemblies/20200628_HHU_assembly-results_CCS_v12/haploid_reads/v12_HG00512_hgsvc_pbsq2-ccs_1000.h2-un.cluster9.fastq.gz	PacBio CCS	HG00512	Benchmark on diploid phased datasets
HG00512	https://ftp.1000genomes.ebi.ac.uk/vol1/ftp/data_collections/HGSVC2/release/v1.0/assemblies/20200628_HHU_assembly-results_CCS_v12/haploid_reads/v12_HG00512_hgsvc_pbsq2-ccs_1000.h2-un.cluster10.fastq.gz	PacBio CCS	HG00512	Benchmark on diploid phased datasets
HG00512	https://ftp.1000genomes.ebi.ac.uk/vol1/ftp/data_collections/HGSVC2/release/v1.0/assemblies/20200628_HHU_assembly-results_CCS_v12/haploid_reads/v12_HG00512_hgsvc_pbsq2-ccs_1000.h2-un.cluster11.fastq.gz	PacBio CCS	HG00512	Benchmark on diploid phased datasets
HG00512	https://ftp.1000genomes.ebi.ac.uk/vol1/ftp/data_collections/HGSVC2/release/v1.0/assemblies/20200628_HHU_assembly-results_CCS_v12/haploid_reads/v12_HG00512_hgsvc_pbsq2-ccs_1000.h2-un.cluster12.fastq.gz	PacBio CCS	HG00512	Benchmark on diploid phased datasets
HG00512	https://ftp.1000genomes.ebi.ac.uk/vol1/ftp/data_collections/HGSVC2/release/v1.0/assemblies/20200628_HHU_assembly-results_CCS_v12/haploid_reads/v12_HG00512_hgsvc_pbsq2-ccs_1000.h2-un.cluster13.fastq.gz	PacBio CCS	HG00512	Benchmark on diploid phased datasets
HG00512	https://ftp.1000genomes.ebi.ac.uk/vol1/ftp/data_collections/HGSVC2/release/v1.0/assemblies/20200628_HHU_assembly-results_CCS_v12/haploid_reads/v12_HG00512_hgsvc_pbsq2-ccs_1000.h2-un.cluster14.fastq.gz	PacBio CCS	HG00512	Benchmark on diploid phased datasets
HG00512	https://ftp.1000genomes.ebi.ac.uk/vol1/ftp/data_collections/HGSVC2/release/v1.0/assemblies/20200628_HHU_assembly-results_CCS_v12/haploid_reads/v12_HG00512_hgsvc_pbsq2-ccs_1000.h2-un.cluster15.fastq.gz	PacBio CCS	HG00512	Benchmark on diploid phased datasets
HG00512	https://ftp.1000genomes.ebi.ac.uk/vol1/ftp/data_collections/HGSVC2/release/v1.0/assemblies/20200628_HHU_assembly-results_CCS_v12/haploid_reads/v12_HG00512_hgsvc_pbsq2-ccs_1000.h2-un.cluster16.fastq.gz	PacBio CCS	HG00512	Benchmark on diploid phased datasets
[truncated: 102 more rows]

## Sheet: Table S2
Supplementary Table 2. List of simulated SV
Chromosome	Start position	End position	SV type	SV length	Genotype
1	248758451	248758501	Deletion	50	heterozygous
1	248719508	248720191	Deletion	683	heterozygous
[truncated: 21,998 more rows]

## Sheet: Table S3
Supplementary Table 3. Summary performance on on simulated phased assemblies
[truncated: 6 more rows]

[truncated: 11 more sheets: Table S4, Table S5, Table S6, Table S7, Table S8, Table S9, Table S10, Table S11, Table S12, Table S13, Table S14]
